# Supplementary material for: Genomic, Epigenomic, and Transcriptomic Profiling towards Identifying Omics Features and Specific Biomarkers That Distinguish Uterine Leiomyosarcoma and Leiomyoma at Molecular Levels
Source: Hindawi journal article supplement (doi:10.1155/2015/412068), 2015-01-01
Supplement: f4 [file 412068.f4.pdf]

**Table S3: full list of candidate expression markers selected using filter conditions shown in Table S2**

| Type          | Normalized log2 intensity |      |      |      |      |      |      |      |      |        |         | Gene<br>Symbol | ProbeName        | Description  | RefSeq<br>Accession                                                                                                  |              |
|---------------|---------------------------|------|------|------|------|------|------|------|------|--------|---------|----------------|------------------|--------------|----------------------------------------------------------------------------------------------------------------------|--------------|
|               | NM1                       | NM2  | NM3  | LM1  | LM2  | LM3  | LMS1 | LMS2 | LMS3 | SK-UT1 | SK-UT1E |                |                  |              |                                                                                                                      | SKN          |
| NMLM-specific | 12.8                      | 13.2 | 12.5 | 13.9 | 13.7 | 15.0 | 3.1  | 2.7  | 2.3  | 2.7    | 2.7     | 2.8            | <i>PGR</i>       | A_32_P49199  | Homo sapiens progesterone receptor (PGR), transcript variant 2, mRNA                                                 | NM_000926    |
|               | 9.3                       | 12.0 | 8.9  | 7.4  | 7.5  | 9.7  | 3.3  | 3.3  | 3.2  | 3.0    | 2.8     | 4.1            | <i>ACKR1</i>     | A_23_P115161 | Homo sapiens atypical chemokine receptor 1 (Duffy blood group) (ACKR1), transcript variant 2, mRNA                   | NM_002036    |
|               | 10.0                      | 6.8  | 8.4  | 8.8  | 6.7  | 7.8  | 3.3  | 2.8  | 2.4  | 2.6    | 2.6     | 2.7            | <i>DPP6</i>      | A_24_P6552   | Homo sapiens dipeptidyl-peptidase 6 (DPP6), transcript variant 3, mRNA                                               | NM_001039350 |
|               | 7.8                       | 8.6  | 7.5  | 7.7  | 6.4  | 8.7  | 2.5  | 2.5  | 2.5  | 2.4    | 2.4     | 2.4            | <i>RIC3</i>      | A_24_P35537  | Homo sapiens RIC3 acetylcholine receptor chaperone (RIC3), transcript variant 1, mRNA                                | NM_024557    |
| NM-specific   | 6.3                       | 10.5 | 9.4  | 2.8  | 3.4  | 6.4  | 3.2  | 2.6  | 2.3  | 2.8    | 2.8     | 2.8            | <i>CYP4B1</i>    | A_23_P114713 | Homo sapiens cytochrome P450, family 4, subfamily B, polypeptide 1 (CYP4B1), transcript variant 2, mRNA              | NM_000779    |
|               | 6.6                       | 9.6  | 8.1  | 3.3  | 2.6  | 6.7  | 3.9  | 2.7  | 2.7  | 2.8    | 2.7     | 3.0            | <i>STEAP4</i>    | A_24_P351906 | Homo sapiens STEAP family member 4 (STEAP4), transcript variant 1, mRNA                                              | NM_024636    |
|               | 8.4                       | 7.6  | 7.6  | 4.1  | 5.3  | 3.1  | 3.6  | 3.9  | 3.6  | 2.6    | 3.0     | 3.4            | <i>MS4A2</i>     | A_23_P1904   | Homo sapiens membrane-spanning 4-domains, subfamily A, member 2 (MS4A2), transcript variant 1, mRNA                  | NM_000139    |
|               | 7.1                       | 7.8  | 8.2  | 4.5  | 4.9  | 3.1  | 2.8  | 2.6  | 2.6  | 2.9    | 3.5     | 3.1            | <i>LCN6</i>      | A_23_P63184  | Homo sapiens lipocalin 6 (LCN6), mRNA                                                                                | NM_198946    |
| LM-specific   | 4.6                       | 4.3  | 2.2  | 10.3 | 9.8  | 8.2  | 4.0  | 4.0  | 3.0  | 3.0    | 2.9     | 3.2            | <i>SMPX</i>      | A_23_P253542 | Homo sapiens small muscle protein, X-linked (SMPX), transcript variant 1, mRNA                                       | NM_014332    |
| LMS-specific  | 3.9                       | 3.4  | 3.7  | 2.7  | 3.2  | 3.1  | 10.5 | 12.0 | 9.8  | 10.1   | 10.8    | 12.9           | <i>FOXD1</i>     | A_32_P34920  | Homo sapiens forkhead box D1 (FOXD1), mRNA                                                                           | NM_004472    |
|               | 4.9                       | 3.3  | 4.1  | 3.5  | 4.7  | 3.1  | 11.6 | 9.7  | 10.6 | 13.4   | 12.9    | 12.4           | <i>CDCA2</i>     | A_23_P385861 | Homo sapiens cell division cycle associated 2 (CDCA2), mRNA                                                          | NM_152562    |
|               | 2.7                       | 3.0  | 2.3  | 4.3  | 4.8  | 5.1  | 11.1 | 9.7  | 10.1 | 12.4   | 12.3    | 11.5           | <i>MELK</i>      | A_23_P94422  | Homo sapiens maternal embryonic leucine zipper kinase (MELK), transcript variant 1, mRNA                             | NM_014791    |
|               | 2.9                       | 2.5  | 2.8  | 3.9  | 3.9  | 3.1  | 10.9 | 9.3  | 10.5 | 12.7   | 13.1    | 11.9           | <i>TICRR</i>     | A_32_P109296 | Homo sapiens TOPBP1-interacting checkpoint and replication regulator (TICRR), mRNA                                   | NM_152259    |
|               | 2.5                       | 2.9  | 2.2  | 3.3  | 2.5  | 3.1  | 11.1 | 9.5  | 9.7  | 11.6   | 11.4    | 11.1           | <i>KIF4A</i>     | A_23_P148475 | Homo sapiens kinesin family member 4A (KIF4A), mRNA                                                                  | NM_012310    |
|               | 2.8                       | 2.8  | 2.5  | 4.4  | 2.3  | 3.1  | 9.4  | 9.5  | 11.0 | 9.2    | 9.5     | 7.7            | <i>GPR158</i>    | A_24_P349117 | Homo sapiens G protein-coupled receptor 158 (GPR158), mRNA                                                           | NM_020752    |
|               | 2.7                       | 4.0  | 4.4  | 3.4  | 3.6  | 4.9  | 10.2 | 8.9  | 9.3  | 11.0   | 10.7    | 9.3            | <i>MTFR2</i>     | A_23_P253752 | Homo sapiens mitochondrial fission regulator 2 (MTFR2), transcript variant 2, mRNA                                   | NM_138419    |
|               | 2.3                       | 4.0  | 2.4  | 2.9  | 2.9  | 3.1  | 10.3 | 8.9  | 9.0  | 10.7   | 10.0    | 10.4           | <i>KIF18A</i>    | A_23_P150667 | Homo sapiens kinesin family member 18A (KIF18A), mRNA                                                                | NM_031217    |
|               | 3.7                       | 2.9  | 2.5  | 2.3  | 4.1  | 3.1  | 9.6  | 9.3  | 9.3  | 10.8   | 10.3    | 10.1           | <i>TTK</i>       | A_23_P259586 | Homo sapiens TTK protein kinase (TTK), transcript variant 1, mRNA                                                    | NM_003318    |
|               | 2.8                       | 2.5  | 3.3  | 2.5  | 3.3  | 3.1  | 9.7  | 7.8  | 10.2 | 10.5   | 11.0    | 10.1           | <i>ESCO2</i>     | A_24_P323598 | Homo sapiens establishment of sister chromatid cohesion N-acetyltransferase 2 (ESCO2), mRNA                          | NM_001017420 |
|               | 3.0                       | 2.5  | 2.7  | 3.3  | 3.1  | 3.1  | 9.4  | 8.6  | 9.4  | 10.1   | 9.5     | 9.7            | <i>AURKB</i>     | A_23_P130182 | Homo sapiens aurora kinase B (AURKB), transcript variant 1, mRNA                                                     | NM_004217    |
|               | 2.3                       | 2.5  | 2.6  | 2.5  | 2.3  | 3.1  | 9.8  | 8.0  | 9.3  | 10.8   | 10.7    | 10.5           | <i>CENPA</i>     | A_24_P413884 | Homo sapiens centromere protein A (CENPA), transcript variant 1, mRNA                                                | NM_001809    |
|               | 4.2                       | 3.0  | 2.5  | 4.5  | 4.7  | 3.1  | 10.0 | 9.0  | 7.9  | 11.0   | 10.7    | 11.1           | <i>ARHGAP11A</i> | A_23_P136805 | Homo sapiens Rho GTPase activating protein 11A (ARHGAP11A), transcript variant 1, mRNA                               | NM_014783    |
|               | 3.2                       | 2.5  | 2.4  | 2.5  | 2.6  | 3.1  | 10.2 | 8.2  | 8.4  | 11.0   | 10.6    | 10.6           | <i>TRMU</i>      | A_24_P916195 | tRNA 5-methylaminomethyl-2-thiouridylate methyltransferase                                                           | XM_005261627 |
|               | 2.8                       | 3.1  | 2.7  | 3.3  | 3.7  | 5.1  | 9.5  | 8.1  | 8.7  | 10.9   | 10.8    | 10.3           | <i>CNNA2</i>     | A_23_P58321  | Homo sapiens cyclin A2 (CNNA2), mRNA                                                                                 | NM_001237    |
|               | 2.3                       | 2.5  | 2.4  | 4.3  | 2.9  | 5.7  | 9.0  | 8.9  | 8.2  | 11.0   | 11.0    | 9.4            | <i>POLQ</i>      | A_23_P218827 | Homo sapiens polymerase (DNA directed), theta (POLQ), mRNA                                                           | NM_199420    |
|               | 2.7                       | 2.5  | 2.3  | 3.8  | 3.0  | 3.1  | 9.5  | 8.5  | 8.0  | 10.1   | 10.5    | 9.7            | <i>CENPM</i>     | A_24_P399888 | Homo sapiens centromere protein M (CENPM), transcript variant 2, mRNA                                                | NM_001002876 |
|               | 2.5                       | 2.5  | 2.2  | 4.4  | 2.6  | 5.8  | 10.0 | 8.5  | 7.4  | 12.1   | 12.4    | 11.1           | <i>RRM2</i>      | A_24_P225616 | Homo sapiens ribonucleotide reductase M2 (RRM2), transcript variant 2, mRNA                                          | NM_001034    |
|               | 3.7                       | 3.9  | 2.6  | 2.5  | 3.3  | 3.1  | 9.3  | 8.5  | 8.0  | 11.1   | 11.3    | 10.8           | <i>KIF18B</i>    | A_24_P680947 | Homo sapiens kinesin family member 18B (KIF18B), transcript variant 2, mRNA                                          | NM_001264573 |
|               | 2.3                       | 2.5  | 2.5  | 3.3  | 2.4  | 3.1  | 10.0 | 8.0  | 7.8  | 10.8   | 11.5    | 10.3           | <i>MCM10</i>     | A_23_P161474 | Homo sapiens minichromosome maintenance complex component 10 (MCM10), transcript variant 1, mRNA                     | NM_182751    |
|               | 4.6                       | 4.9  | 2.4  | 4.2  | 2.2  | 3.1  | 8.6  | 8.6  | 8.4  | 9.7    | 9.7     | 9.6            | <i>CENPN</i>     | A_23_P355075 | Homo sapiens centromere protein N (CENPN), transcript variant 2, mRNA                                                | NM_001100624 |
|               | 3.2                       | 2.5  | 2.4  | 2.5  | 2.5  | 3.1  | 7.3  | 8.4  | 9.8  | 9.7    | 9.9     | 9.3            | <i>MKI67</i>     | A_24_P346855 | Homo sapiens marker of proliferation Ki-67 (MKI67), transcript variant 1, mRNA                                       | NM_002417    |
|               | 2.5                       | 2.5  | 2.5  | 4.0  | 3.0  | 7.1  | 6.4  | 7.3  | 11.4 | 10.9   | 11.0    | 8.0            | <i>LHX2</i>      | A_23_P32165  | Homo sapiens LIM homeobox 2 (LHX2), mRNA                                                                             | NM_004789    |
|               | 2.4                       | 2.5  | 2.8  | 3.2  | 4.7  | 6.4  | 9.3  | 8.3  | 7.4  | 9.5    | 9.5     | 9.5            | <i>SGOL1</i>     | A_24_P225970 | Homo sapiens shugoshin-like 1 (S. pombe) (SGOL1), transcript variant A1, mRNA                                        | NM_001012409 |
|               | 2.9                       | 2.9  | 3.2  | 2.6  | 4.3  | 3.1  | 9.2  | 8.4  | 7.4  | 9.1    | 8.4     | 8.5            | <i>ASPM</i>      | A_24_P911179 | Homo sapiens asp (abnormal spindle) homolog, microcephaly associated (Drosophila) (ASPM), transcript variant 1, mRNA | NM_018136    |
|               | 2.4                       | 2.5  | 2.5  | 2.8  | 3.1  | 5.4  | 9.0  | 7.9  | 8.1  | 11.2   | 11.0    | 10.9           | <i>HJURP</i>     | A_24_P257099 | Homo sapiens Holliday junction recognition protein (HJURP), transcript variant 1, mRNA                               | NM_018410    |
|               | 2.4                       | 5.7  | 3.0  | 3.9  | 4.3  | 4.7  | 9.4  | 7.8  | 7.6  | 10.4   | 11.2    | 9.7            | <i>MCM10</i>     | A_24_P412088 | Homo sapiens minichromosome maintenance complex component 10 (MCM10), transcript variant 1, mRNA                     | NM_182751    |
|               | 4.1                       | 2.5  | 2.4  | 4.5  | 2.9  | 3.1  | 8.2  | 7.7  | 8.7  | 9.7    | 9.5     | 8.9            | <i>PLK4</i>      | A_23_P155969 | Homo sapiens polo-like kinase 4 (PLK4), transcript variant 1, mRNA                                                   | NM_014264    |
|               | 2.6                       | 3.1  | 4.5  | 3.9  | 3.4  | 5.7  | 9.3  | 8.4  | 6.8  | 11.0   | 10.6    | 9.9            | <i>PLK1</i>      | A_23_P118174 | Homo sapiens polo-like kinase 1 (PLK1), mRNA                                                                         | NM_005030    |
|               | 2.4                       | 5.7  | 2.9  | 3.6  | 3.3  | 6.6  | 8.3  | 8.1  | 7.9  | 11.2   | 11.7    | 10.8           | <i>SAPCD2</i>    | A_24_P100517 | Homo sapiens suppressor APC domain containing 2 (SAPCD2), mRNA                                                       | NM_178448    |
|               | 3.0                       | 3.5  | 3.2  | 2.5  | 2.7  | 3.1  | 8.1  | 7.4  | 8.0  | 9.1    | 8.9     | 8.3            | <i>NEIL3</i>     | A_23_P155711 | Homo sapiens nei endonuclease VIII-like 3 (E. coli) (NEIL3), mRNA                                                    | NM_018248    |
|               | 2.3                       | 2.5  | 2.4  | 3.3  | 2.4  | 3.1  | 9.1  | 6.8  | 7.1  | 9.1    | 9.2     | 7.6            | <i>STRIP2</i>    | A_32_P233735 | Homo sapiens striatin interacting protein 2 (STRIP2), transcript variant 1, mRNA                                     | NM_020704    |
|               | 4.0                       | 2.5  | 2.4  | 3.4  | 2.5  | 5.2  | 9.8  | 6.7  | 6.1  | 12.2   | 7.7     | 10.1           | <i>RAB3B</i>     | A_24_P933319 | Homo sapiens RAB3B, member RAS oncogene family (RAB3B), mRNA                                                         | NM_002867    |
|               | 3.6                       | 3.7  | 2.8  | 4.4  | 3.9  | 4.9  | 6.3  | 8.3  | 7.8  | 9.4    | 8.9     | 9.3            | <i>FBXL5</i>     | A_32_P108748 | F-box and leucine-rich repeat protein 5                                                                              | XR_425710    |
|               | 3.7                       | 2.5  | 2.6  | 2.3  | 2.6  | 3.1  | 8.0  | 7.0  | 6.8  | 10.0   | 9.3     | 9.4            | <i>CDCA2</i>     | A_24_P323434 | Homo sapiens cell division cycle associated 2 (CDCA2), mRNA                                                          | NM_152562    |
|               | 2.4                       | 2.5  | 2.5  | 4.2  | 2.5  | 3.1  | 8.3  | 6.1  | 7.4  | 8.6    | 8.6     | 8.1            | <i>GINS4</i>     | A_23_P136786 | Homo sapiens GINS complex subunit 4 (Sld5 homolog) (GINS4), mRNA                                                     | NM_032336    |
|               | 2.6                       | 4.7  | 3.8  | 3.4  | 4.5  | 4.8  | 6.9  | 6.6  | 7.9  | 5.6    | 6.7     | 9.6            | <i>ADAMTS14</i>  | A_24_P275073 | Homo sapiens ADAM metalloproteinase with thrombospondin type 1 motif, 14 (ADAMTS14), transcript variant 1, mRNA      | NM_139155    |
|               | 4.6                       | 2.5  | 2.5  | 4.2  | 2.4  | 3.1  | 7.3  | 6.8  | 7.0  | 9.6    | 10.1    | 9.2            | <i>FANCD2</i>    | A_23_P143994 | Homo sapiens Fanconi anemia, complementation group D2 (FANCD2), transcript variant 2, mRNA                           | NM_001018115 |
|               | 3.5                       | 2.5  | 2.4  | 2.7  | 2.3  | 3.1  | 7.3  | 7.2  | 6.6  | 9.3    | 8.4     | 8.0            | <i>NEK2</i>      | A_24_P319613 | Homo sapiens NIMA-related kinase 2 (NEK2), transcript variant 1, mRNA                                                | NM_002497    |
|               | 3.3                       | 2.5  | 2.5  | 4.1  | 2.7  | 3.1  | 6.1  | 6.4  | 8.5  | 6.6    | 6.5     | 5.8            | <i>SYCE2</i>     | A_32_P203528 | Homo sapiens synaptonemal complex central element protein 2 (SYCE2), mRNA                                            | NM_001105578 |
|               | 3.9                       | 2.5  | 2.5  | 4.4  | 2.8  | 3.1  | 7.4  | 6.3  | 7.1  | 8.4    | 8.2     | 7.5            | <i>RELT</i>      | A_23_P47735  | Homo sapiens RELT tumor necrosis factor receptor (RELT), transcript variant 1, mRNA                                  | NM_032871    |
|               | 3.1                       | 2.5  | 2.5  | 4.1  | 2.4  | 3.1  | 7.7  | 7.0  | 6.1  | 9.3    | 9.8     | 8.1            | <i>ORC1</i>      | A_23_P45799  | Homo sapiens origin recognition complex, subunit 1 (ORC1), transcript variant 1, mRNA                                | NM_004153    |
|               | 2.5                       | 2.8  | 2.3  | 2.9  | 2.7  | 3.1  | 6.4  | 7.3  | 6.9  | 8.5    | 8.7     | 7.8            | <i>GSG2</i>      | A_23_P66732  | Homo sapiens germ cell associated 2 (haspin) (GSG2), mRNA                                                            | NM_031965    |
|               | 2.3                       | 2.5  | 2.9  | 3.9  | 2.5  | 3.1  | 6.8  | 6.9  | 6.7  | 9.3    | 9.3     | 8.3            | <i>CCNF</i>      | A_23_P37954  | Homo sapiens cyclin F (CCNF), mRNA                                                                                   | NM_001761    |

Normalized log2 intensity

LMS-specific genes shown in Fig.2C are shown in red.
