# Supplementary material for: Genomic, Epigenomic, and Transcriptomic Profiling towards Identifying Omics Features and Specific Biomarkers That Distinguish Uterine Leiomyosarcoma and Leiomyoma at Molecular Levels
Source: Sarcoma. 2015 Dec 28;2015:412068. doi: 10.1155/2015/412068 (PMC4707342; doi:10.1155/2015/412068)
Supplement: Supplementary file 6 [file 412068.f6.xlsx]

## Sheet: TableS5
Table S5: List of 7110 genes hosting differentially methylated regions in LMS compared to NM detected by IMA (Δβ > 0.2 and Δβ < -0.2 are highlighted in red and green, respectively)
Gene-Symbol	TSS1500			TSS200			5'UTR			1st Exon			gene body			3'UTR			hyper- methylated	PcG target*	Proto- cadherin (PCDH)	hypo- methylated
	LMS_β	NM_β	Δβ	LMS_β	NM_β	Δβ	LMS_β	NM_β	Δβ	LMS_β	NM_β	Δβ	LMS_β	NM_β	Δβ	LMS_β	NM_β	Δβ
MARCH1	0.224489	0.334029	-0.10954	0.0987029	0.0994932	-0.000790284	0.523804	0.744246	-0.220441	0.196408	0.378615	-0.182207	0.460035	0.736601	-0.276566	0.937938	0.936674	0.0012637	0	No	No	2
MARCH2	0.304356	0.450233	-0.145877	0.007082	0.0135754	-0.00649341	0.445082	0.43513	0.0099524	#N/A	#N/A	#N/A	0.851738	0.844408	0.00733081	0.467174	0.757322	-0.290149	0	No	No	1
MARCH3	0.462246	0.371275	0.0909713	0.0204832	0.0264689	-0.00598571	0.446439	0.515069	-0.0686294	0.00492503	0.00537875	-0.000453717	0.545385	0.688756	-0.14337	0.299987	0.0923019	0.207685	1	No	No	0
MARCH10	0.724412	0.527537	0.196874	0.629839	0.27125	0.358589	0.610506	0.499329	0.111177	0.254722	0.0338228	0.220899	0.580414	0.558075	0.0223394	0.816087	0.824363	-0.0082758	2	No	No	0
MARCH11	0.0934598	0.150048	-0.0565882	0.138252	0.0158377	0.122414	0.0957659	0.0726032	0.0231626	0.124703	0.082141	0.0425616	0.188984	0.428926	-0.239941	#N/A	#N/A	#N/A	0	No	No	1
SEPT1	0.341035	0.598572	-0.257537	#N/A	#N/A	#N/A	0.705573	0.797565	-0.0919927	#N/A	#N/A	#N/A	0.254042	0.2522	0.0018429	0.0376144	0.0610537	-0.0234393	0	No	No	1
SEPT12	0.628403	0.648051	-0.0196482	0.72694	0.7108	0.0161399	0.514417	0.696402	-0.181985	#N/A	#N/A	#N/A	0.711774	0.786953	-0.0751796	0.492895	0.765264	-0.272369	0	No	No	1
SEPT14	0.408445	0.835089	-0.426644	#N/A	#N/A	#N/A	#N/A	#N/A	#N/A	#N/A	#N/A	#N/A	0.25235	0.797271	-0.544922	#N/A	#N/A	#N/A	0	No	No	2
A1CF	0.442042	0.817876	-0.375834	#N/A	#N/A	#N/A	0.478128	0.861393	-0.383265	0.546165	0.865474	-0.319308	0.240569	0.771436	-0.530867	#N/A	#N/A	#N/A	0	No	No	4
A2BP1	0.209233	0.555701	-0.346468	0.0528865	0.0872886	-0.0344022	0.233313	0.528859	-0.295545	0.133537	0.325598	-0.192061	0.260908	0.626422	-0.365514	0.446787	0.787216	-0.340429	0	Yes	No	4
A2M	0.0710049	0.261513	-0.190508	#N/A	#N/A	#N/A	#N/A	#N/A	#N/A	0.121707	0.210124	-0.0884172	0.634098	0.839751	-0.205653	0.444291	0.740621	-0.29633	0	No	No	2
A2ML1	0.628484	0.704804	-0.0763208	#N/A	#N/A	#N/A	0.894122	0.893593	0.000528917	0.894122	0.893593	0.000528917	0.549381	0.801389	-0.252008	0.67267	0.806409	-0.133739	0	No	No	1
A4GNT	0.602481	0.863411	-0.26093	#N/A	#N/A	#N/A	0.567288	0.702653	-0.135364	0.567288	0.702653	-0.135364	0.425968	0.334211	0.0917569	#N/A	#N/A	#N/A	0	No	No	1
AAA1	0.511614	0.874107	-0.362494	0.579169	0.941487	-0.362318	#N/A	#N/A	#N/A	#N/A	#N/A	#N/A	0.331954	0.780966	-0.449012	#N/A	#N/A	#N/A	0	No	No	3
AACS	0.0837986	0.0517249	0.0320737	0.0346873	0.0445708	-0.00988346	0.0620835	0.0873357	-0.0252521	0.0507874	0.0688758	-0.0180884	0.820662	0.864458	-0.0437963	0.540635	0.901163	-0.360529	0	No	No	1
AACSL	0.846663	0.814519	0.0321435	0.607337	0.825034	-0.217697	#N/A	#N/A	#N/A	#N/A	#N/A	#N/A	0.740413	0.901152	-0.160738	#N/A	#N/A	#N/A	0	No	No	1
AADACL2	0.637249	0.886475	-0.249226	#N/A	#N/A	#N/A	#N/A	#N/A	#N/A	#N/A	#N/A	#N/A	0.689832	0.797055	-0.107222	#N/A	#N/A	#N/A	0	No	No	1
AADACL3	0.275975	0.725429	-0.449454	0.313858	0.892508	-0.57865	0.506604	0.771094	-0.26449	0.559266	0.730366	-0.171099	0.324135	0.82518	-0.501045	0.190492	0.882315	-0.691823	0	No	No	5
AADACL4	0.548289	0.868196	-0.319907	0.825141	0.942957	-0.117816	#N/A	#N/A	#N/A	#N/A	#N/A	#N/A	0.057948	0.0806724	-0.0227244	0.5746	0.629884	-0.0552836	0	No	No	1
ABAT	0.349411	0.469598	-0.120187	0.130154	0.217033	-0.0868788	0.242124	0.389229	-0.147105	0.158241	0.307032	-0.148791	0.666834	0.776151	-0.109317	0.511907	0.89827	-0.386363	0	Yes	No	1
ABCA13	#N/A	#N/A	#N/A	#N/A	#N/A	#N/A	#N/A	#N/A	#N/A	#N/A	#N/A	#N/A	0.503723	0.875538	-0.371815	0.516267	0.917265	-0.400998	0	No	No	2
ABCA3	0.394187	0.383774	0.0104126	#N/A	#N/A	#N/A	0.381362	0.532974	-0.151611	#N/A	#N/A	#N/A	0.610171	0.792397	-0.182226	0.577656	0.819246	-0.241589	0	Yes	No	1
ABCA6	0.361115	0.592639	-0.231524	#N/A	#N/A	#N/A	0.202317	0.237626	-0.0353088	0.202317	0.237626	-0.0353088	#N/A	#N/A	#N/A	#N/A	#N/A	#N/A	0	No	No	1
ABCA8	#N/A	#N/A	#N/A	0.287986	0.357925	-0.069939	0.54988	0.715034	-0.165154	#N/A	#N/A	#N/A	0.425546	0.636177	-0.210631	#N/A	#N/A	#N/A	0	No	No	1
ABCA9	0.32556	0.595862	-0.270302	0.109582	0.0757953	0.0337863	0.529743	0.647551	-0.117808	#N/A	#N/A	#N/A	0.8467	0.922612	-0.0759122	0.47139	0.786497	-0.315107	0	No	No	2
ABCB1	0.576857	0.767429	-0.190572	#N/A	#N/A	#N/A	0.137311	0.224585	-0.087274	#N/A	#N/A	#N/A	0.579162	0.835553	-0.256391	#N/A	#N/A	#N/A	0	No	No	1
ABCB11	0.244463	0.825748	-0.581285	0.371403	0.640149	-0.268746	0.497831	0.875289	-0.377459	0.225701	0.811596	-0.585895	0.816818	0.875741	-0.0589225	0.921679	0.926752	-0.00507353	0	No	No	4
ABCB4	0.431902	0.283742	0.148161	0.018132	0.0271259	-0.00899389	0.00969609	0.0153359	-0.00563977	#N/A	#N/A	#N/A	0.434044	0.644043	-0.209999	#N/A	#N/A	#N/A	0	No	No	1
ABCB5	0.598181	0.775156	-0.176975	0.473376	0.46747	0.00590567	0.645822	0.867381	-0.221559	0.729532	0.938201	-0.20867	0.57782	0.833452	-0.255632	0.581004	0.914745	-0.333742	0	No	No	4
ABCB7	0.267027	0.522261	-0.255234	0.116442	0.383438	-0.266996	#N/A	#N/A	#N/A	0.150953	0.266616	-0.115662	0.12175	0.379847	-0.258097	#N/A	#N/A	#N/A	0	No	No	3
ABCC11	0.666713	0.821365	-0.154652	0.644769	0.787003	-0.142234	0.735204	0.799515	-0.0643105	0.376162	0.715078	-0.338916	0.587715	0.826676	-0.238961	0.664505	0.830819	-0.166314	0	No	No	2
ABCC12	0.431585	0.76885	-0.337265	#N/A	#N/A	#N/A	0.376827	0.903459	-0.526632	0.376827	0.903459	-0.526632	0.361282	0.757295	-0.396013	0.306627	0.898894	-0.592267	0	No	No	5
ABCC13	0.610177	0.913465	-0.303288	0.467003	0.791722	-0.32472	#N/A	#N/A	#N/A	#N/A	#N/A	#N/A	0.41703	0.537283	-0.120253	#N/A	#N/A	#N/A	0	No	No	2
ABCC8	0.398404	0.505835	-0.10743	0.0662291	0.0580643	0.00816475	0.0593338	0.0636804	-0.00434654	0.0839086	0.0901609	-0.00625238	0.341837	0.589339	-0.247502	#N/A	#N/A	#N/A	0	Yes	No	1
ABCD2	0.0493446	0.0745984	-0.0252538	0.0194492	0.0433853	-0.0239361	0.0781798	0.0946973	-0.0165175	0.0781798	0.0946973	-0.0165175	0.442152	0.677323	-0.235171	#N/A	#N/A	#N/A	0	No	No	1
ABCF1	0.168847	0.181488	-0.0126411	0.0208583	0.0244061	-0.00354786	0.0069138	0.00967361	-0.00275982	0.0069138	0.00967361	-0.00275982	0.625718	0.59955	0.0261677	0.555283	0.304235	0.251048	1	No	No	0
ABCG1	0.131186	0.245066	-0.113881	0.0729249	0.0713925	0.00153238	0.201413	0.255821	-0.0544078	0.046667	0.0445847	0.00208223	0.210327	0.277803	-0.0674752	0.389744	0.861126	-0.471382	0	No	No	1
ABCG4	0.418618	0.470207	-0.0515886	0.0192311	0.032181	-0.0129499	0.0289268	0.0433071	-0.0143803	0.0438629	0.054966	-0.0111032	0.772188	0.724474	0.0477136	0.367925	0.615607	-0.247682	0	Yes	No	1
ABCG8	0.732532	0.828881	-0.0963491	0.582011	0.600339	-0.0183277	#N/A	#N/A	#N/A	0.862732	0.852692	0.0100401	0.631581	0.88017	-0.248589	0.20633	0.199227	0.00710323	0	No	No	1
ABHD15	0.0265066	0.0381142	-0.0116076	0.0445742	0.0490192	-0.00444494	#N/A	#N/A	#N/A	0.604328	0.358554	0.245774	0.826418	0.789455	0.0369633	0.548553	0.699295	-0.150741	1	No	No	0
ABHD6	0.246799	0.268028	-0.0212295	0.0514212	0.0604841	-0.00906292	0.372584	0.340903	0.0316808	0.0402702	0.049815	-0.00954477	0.63369	0.839024	-0.205335	0.524983	0.437195	0.0877874	0	Yes	No	1
ABI1	0.139372	0.37879	-0.239419	0.0579889	0.0735377	-0.0155488	0.00981017	0.0115503	-0.00174012	0.00981017	0.0115503	-0.00174012	0.552674	0.587931	-0.0352572	#N/A	#N/A	#N/A	0	No	No	1
ABI3	0.52263	0.712418	-0.189788	0.12256	0.342365	-0.219805	0.227761	0.144482	0.0832798	0.227761	0.144482	0.0832798	0.44463	0.596856	-0.152227	0.464649	0.681847	-0.217198	0	No	No	2
ABLIM2	0.236898	0.269129	-0.0322307	0.0108015	0.016789	-0.00598748	#N/A	#N/A	#N/A	#N/A	#N/A	#N/A	0.576993	0.791332	-0.21434	0.831099	0.853032	-0.0219332	0	No	No	1
ABLIM3	0.622787	0.786424	-0.163638	0.335003	0.348387	-0.0133841	0.167744	0.113605	0.0541399	0.04132	0.0548858	-0.0135658	0.428381	0.59147	-0.163089	0.400023	0.83285	-0.432827	0	No	No	1
ABP1	0.352005	0.707372	-0.355367	0.373176	0.667046	-0.29387	0.441965	0.764868	-0.322903	#N/A	#N/A	#N/A	0.570126	0.841568	-0.271441	0.472287	0.749396	-0.277108	0	No	No	5
ACACB	0.669111	0.870579	-0.201469	#N/A	#N/A	#N/A	#N/A	#N/A	#N/A	0.812975	0.842208	-0.0292339	0.529937	0.532827	-0.00288932	0.73794	0.453806	0.284134	1	No	No	1
ACADL	0.37943	0.639682	-0.260252	0.0958499	0.0791919	0.016658	0.0554814	0.0353505	0.0201309	0.0554814	0.0353505	0.0201309	0.0706171	0.0608778	0.00973934	#N/A	#N/A	#N/A	0	Yes	No	1
ACBD5	0.042444	0.0659517	-0.0235077	0.0189273	0.0207451	-0.00181778	0.0401995	0.0570873	-0.0168878	0.0332493	0.0560618	-0.0228125	0.156184	0.191763	-0.0355799	0.680747	0.914025	-0.233278	0	No	No	1
ACCN1	0.230016	0.284159	-0.0541433	0.0803581	0.087777	-0.0074189	0.09777	0.117917	-0.0201469	0.104985	0.11407	-0.00908533	0.339371	0.629676	-0.290305	0.51544	0.868222	-0.352782	0	Yes	No	2
ACCN5	0.491798	0.67655	-0.184752	#N/A	#N/A	#N/A	#N/A	#N/A	#N/A	#N/A	#N/A	#N/A	0.390575	0.800118	-0.409543	#N/A	#N/A	#N/A	0	No	No	1
ACCSL	0.460482	0.739254	-0.278772	#N/A	#N/A	#N/A	0.452833	0.709736	-0.256903	0.452833	0.709736	-0.256903	0.682139	0.860417	-0.178278	0.740482	0.728065	0.0124176	0	No	No	3
ACE	0.338098	0.389352	-0.0512539	0.188898	0.219114	-0.0302167	0.593236	0.553678	0.0395586	0.246055	0.239493	0.00656255	0.664956	0.771096	-0.10614	0.528039	0.741517	-0.213478	0	No	No	1
ACE2	0.700467	0.871939	-0.171472	0.633526	0.89263	-0.259104	0.57786	0.763966	-0.186107	0.474116	0.663174	-0.189058	0.0826718	0.0773044	0.00536744	0.529877	0.787386	-0.257509	0	No	No	2
ACER1	0.670517	0.808769	-0.138252	0.393953	0.692425	-0.298473	0.651358	0.749512	-0.0981545	0.524078	0.779704	-0.255626	0.3334	0.499714	-0.166314	0.454908	0.874626	-0.419718	0	No	No	3
ACMSD	0.240998	0.738725	-0.497728	#N/A	#N/A	#N/A	#N/A	#N/A	#N/A	#N/A	#N/A	#N/A	0.830248	0.889007	-0.0587591	#N/A	#N/A	#N/A	0	No	No	1
ACO2	0.0455522	0.0517665	-0.00621436	0.0308796	0.0426115	-0.0117319	#N/A	#N/A	#N/A	0.0680314	0.132277	-0.0642456	0.503678	0.485643	0.0180353	0.712711	0.504481	0.20823	1	No	No	0
ACOT6	0.760336	0.750863	0.0094737	0.575932	0.667344	-0.0914122	0.694466	0.792057	-0.0975912	0.694466	0.792057	-0.0975912	0.699663	0.947417	-0.247754	#N/A	#N/A	#N/A	0	No	No	1
ACOT9	0.287062	0.472014	-0.184952	0.167418	0.380114	-0.212696	0.392738	0.411643	-0.0189045	0.392738	0.411643	-0.0189045	0.3971	0.488603	-0.0915037	0.803834	0.894332	-0.0904983	0	No	No	1
ACOX2	0.575418	0.281311	0.294107	#N/A	#N/A	#N/A	0.618539	0.255042	0.363498	#N/A	#N/A	#N/A	0.792064	0.696711	0.0953528	#N/A	#N/A	#N/A	2	No	No	0
ACP5	0.704956	0.373604	0.331352	0.774228	0.443606	0.330622	0.622911	0.3228	0.300111	0.550904	0.223614	0.32729	0.893333	0.917393	-0.0240599	0.75449	0.731123	0.0233676	4	No	No	0
ACPL2	0.0517624	0.0225513	0.0292112	0.0179229	0.0248242	-0.00690128	0.423928	0.382894	0.0410338	#N/A	#N/A	#N/A	0.689509	0.922754	-0.233244	0.521704	0.297608	0.224096	1	No	No	1
ACPP	0.384383	0.867297	-0.482914	0.416676	0.494465	-0.0777888	#N/A	#N/A	#N/A	0.134827	0.104343	0.0304837	0.824075	0.879879	-0.0558032	0.820258	0.883877	-0.0636191	0	No	No	1
ACPT	0.617552	0.827614	-0.210062	0.801846	0.863408	-0.0615618	#N/A	#N/A	#N/A	0.725272	0.864049	-0.138776	0.292005	0.467582	-0.175576	#N/A	#N/A	#N/A	0	No	No	1
ACR	0.580859	0.833274	-0.252415	0.547462	0.83721	-0.289747	#N/A	#N/A	#N/A	0.343159	0.743662	-0.400503	0.13085	0.55366	-0.422811	#N/A	#N/A	#N/A	0	No	No	4
ACSBG1	0.689783	0.815509	-0.125725	#N/A	#N/A	#N/A	#N/A	#N/A	#N/A	0.648378	0.726197	-0.0778188	0.237302	0.479208	-0.241907	0.942757	0.922553	0.0202037	0	No	No	1
ACSBG2	0.512172	0.690146	-0.177974	0.282128	0.514662	-0.232534	0.0924294	0.318433	-0.226004	#N/A	#N/A	#N/A	0.276815	0.449304	-0.172489	0.927289	0.926517	0.000771933	0	No	No	2
ACSL3	0.056228	0.189253	-0.133025	0.0336605	0.0643854	-0.0307248	0.351939	0.335397	0.016542	0.0194643	0.0257523	-0.00628795	0.753172	0.77305	-0.0198781	0.695907	0.909714	-0.213807	0	No	No	1
ACSL5	0.564053	0.747529	-0.183476	0.291266	0.498973	-0.207707	0.328584	0.514526	-0.185942	0.320784	0.505311	-0.184527	0.781721	0.854485	-0.0727639	0.934707	0.903519	0.0311872	0	No	No	1
ACSM1	0.439707	0.628541	-0.188834	0.35526	0.701483	-0.346222	#N/A	#N/A	#N/A	0.553902	0.91663	-0.362729	0.507299	0.592706	-0.085407	0.424896	0.884842	-0.459946	0	No	No	3
ACSM2A	#N/A	#N/A	#N/A	#N/A	#N/A	#N/A	#N/A	#N/A	#N/A	#N/A	#N/A	#N/A	0.286275	0.65052	-0.364244	#N/A	#N/A	#N/A	0	No	No	1
ACSM3	0.101493	0.332871	-0.231378	0.112382	0.328807	-0.216424	0.49019	0.521341	-0.0311507	0.0316178	0.0657264	-0.0341086	0.846141	0.934794	-0.0886523	#N/A	#N/A	#N/A	0	No	No	2
ACSM4	0.256667	0.81108	-0.554414	#N/A	#N/A	#N/A	#N/A	#N/A	#N/A	0.433703	0.857153	-0.42345	0.282052	0.712879	-0.430828	#N/A	#N/A	#N/A	0	No	No	3
ACSM5	0.369717	0.597331	-0.227614	0.361633	0.589424	-0.227791	0.328989	0.779402	-0.450413	#N/A	#N/A	#N/A	0.533608	0.817116	-0.283508	0.188306	0.604802	-0.416496	0	No	No	5
ACSS3	0.472271	0.0999389	0.372333	0.460307	0.0680038	0.392303	0.533052	0.0446423	0.48841	0.49523	0.0693423	0.425888	0.627922	0.600182	0.0277401	#N/A	#N/A	#N/A	4	No	No	0
ACTBL2	0.80585	0.8566	-0.0507495	0.54366	0.756345	-0.212685	#N/A	#N/A	#N/A	0.943629	0.944925	-0.00129591	#N/A	#N/A	#N/A	0.954667	0.949999	0.00466773	0	No	No	1
ACTC1	0.598787	0.741161	-0.142374	0.54527	0.731879	-0.186609	0.0386438	0.0512739	-0.0126301	0.025124	0.0284384	-0.00331434	0.449842	0.394724	0.0551188	0.374964	0.718349	-0.343386	0	No	No	1
ACTG2	0.589682	0.670044	-0.0803617	0.232737	0.452756	-0.22002	0.418265	0.553808	-0.135543	0.335949	0.484825	-0.148876	0.484735	0.213467	0.271268	#N/A	#N/A	#N/A	1	No	No	1
ACTL6B	0.520366	0.775715	-0.255349	0.094746	0.132496	-0.0377502	#N/A	#N/A	#N/A	#N/A	#N/A	#N/A	0.216105	0.369087	-0.152981	#N/A	#N/A	#N/A	0	No	No	1
ACTL8	0.466567	0.845909	-0.379342	0.044132	0.0868228	-0.0426909	0.404568	0.609796	-0.205228	#N/A	#N/A	#N/A	0.379588	0.658368	-0.278779	0.334322	0.848449	-0.514127	0	No	No	4
ACTL9	0.271636	0.73389	-0.462255	0.433395	0.689419	-0.256024	0.697445	0.902679	-0.205234	0.425174	0.594906	-0.169732	#N/A	#N/A	#N/A	#N/A	#N/A	#N/A	0	No	No	3
ACTR3C	0.728276	0.681942	0.046334	0.152718	0.23199	-0.0792723	0.416474	0.455829	-0.0393546	0.18561	0.448151	-0.262541	0.600968	0.805728	-0.204761	0.537015	0.927506	-0.390491	0	No	No	3
ACTRT1	#N/A	#N/A	#N/A	#N/A	#N/A	#N/A	#N/A	#N/A	#N/A	0.398051	0.679908	-0.281857	#N/A	#N/A	#N/A	#N/A	#N/A	#N/A	0	No	No	1
ACTRT2	0.433398	0.848239	-0.414841	0.0927018	0.202452	-0.10975	0.267829	0.433864	-0.166034	0.372634	0.764788	-0.392154	#N/A	#N/A	#N/A	0.499838	0.914832	-0.414994	0	No	No	3
ACY3	0.121286	0.444654	-0.323368	0.0926194	0.457259	-0.36464	0.127996	0.291516	-0.163521	0.103528	0.220039	-0.116511	0.471736	0.720496	-0.248761	0.499534	0.864418	-0.364884	0	No	No	4
ADAD1	0.702352	0.916762	-0.21441	0.829223	0.936184	-0.106961	0.82961	0.926901	-0.0972909	0.854145	0.919171	-0.0650251	0.670965	0.850945	-0.17998	#N/A	#N/A	#N/A	0	No	No	1
ADAD2	0.825961	0.860171	-0.03421	0.503387	0.714091	-0.210704	0.514275	0.743327	-0.229051	0.705545	0.879042	-0.173497	0.499994	0.596603	-0.0966099	0.677406	0.480679	0.196727	0	No	No	2
ADAM12	0.739557	0.679234	0.0603229	0.58931	0.33925	0.25006	0.066607	0.0824049	-0.0157979	0.066607	0.0824049	-0.0157979	0.498201	0.589005	-0.0908048	0.524216	0.562786	-0.0385692	1	No	No	0
ADAM18	0.421629	0.716748	-0.295119	0.739396	0.93491	-0.195514	#N/A	#N/A	#N/A	#N/A	#N/A	#N/A	0.70449	0.863903	-0.159414	#N/A	#N/A	#N/A	0	No	No	1
ADAM2	0.765406	0.865839	-0.100434	0.707779	0.91661	-0.208831	#N/A	#N/A	#N/A	0.708413	0.925499	-0.217086	#N/A	#N/A	#N/A	#N/A	#N/A	#N/A	0	No	No	2
ADAM20	#N/A	#N/A	#N/A	#N/A	#N/A	#N/A	0.449755	0.919366	-0.469611	#N/A	#N/A	#N/A	0.331328	0.912209	-0.580881	#N/A	#N/A	#N/A	0	No	No	2
ADAM21	0.198531	0.896345	-0.697814	0.184354	0.760307	-0.575953	#N/A	#N/A	#N/A	0.261894	0.795575	-0.53368	#N/A	#N/A	#N/A	#N/A	#N/A	#N/A	0	No	No	3
ADAM21P1	0.29522	0.880596	-0.585376	#N/A	#N/A	#N/A	#N/A	#N/A	#N/A	#N/A	#N/A	#N/A	0.175417	0.750996	-0.575579	#N/A	#N/A	#N/A	0	No	No	2
ADAM28	#N/A	#N/A	#N/A	0.500202	0.705153	-0.204951	0.368026	0.671934	-0.303908	0.368026	0.671934	-0.303908	0.572591	0.892222	-0.319631	0.699455	0.891901	-0.192445	0	No	No	4
ADAM29	0.461527	0.903812	-0.442285	0.581988	0.874988	-0.293	0.465072	0.879455	-0.414383	0.48075	0.887191	-0.40644	0.415581	0.935468	-0.519887	0.254409	0.778578	-0.524169	0	No	No	6
ADAM30	0.839581	0.913461	-0.0738798	#N/A	#N/A	#N/A	0.725234	0.396547	0.328687	0.737096	0.573362	0.163734	#N/A	#N/A	#N/A	#N/A	#N/A	#N/A	1	No	No	0
ADAM32	0.851938	0.755134	0.0968044	0.508046	0.11286	0.395186	0.490659	0.0246642	0.465995	0.490659	0.0246642	0.465995	0.644728	0.676971	-0.0322427	#N/A	#N/A	#N/A	3	No	No	0
ADAM3A	#N/A	#N/A	#N/A	0.646025	0.91438	-0.268355	#N/A	#N/A	#N/A	#N/A	#N/A	#N/A	0.642139	0.811558	-0.169419	#N/A	#N/A	#N/A	0	No	No	1
ADAM5P	0.618785	0.750682	-0.131897	0.516127	0.289497	0.226629	#N/A	#N/A	#N/A	#N/A	#N/A	#N/A	0.617627	0.878417	-0.26079	#N/A	#N/A	#N/A	1	No	No	1
ADAM6	0.352489	0.747899	-0.395411	0.277791	0.777773	-0.499982	#N/A	#N/A	#N/A	#N/A	#N/A	#N/A	0.262572	0.76452	-0.501948	#N/A	#N/A	#N/A	0	No	No	3
ADAM7	0.417216	0.848547	-0.431331	#N/A	#N/A	#N/A	#N/A	#N/A	#N/A	#N/A	#N/A	#N/A	0.448967	0.892779	-0.443812	0.267189	0.458591	-0.191401	0	No	No	2
ADAMDEC1	0.666578	0.924324	-0.257745	0.602239	0.907928	-0.305689	0.400313	0.771016	-0.370703	#N/A	#N/A	#N/A	0.400237	0.830148	-0.429911	#N/A	#N/A	#N/A	0	No	No	4
ADAMTS13	0.750868	0.741299	0.00956913	0.211254	0.291427	-0.0801728	0.545036	0.540846	0.0041899	0.545036	0.540846	0.0041899	0.468464	0.527685	-0.0592212	0.250556	0.533311	-0.282755	0	No	No	1
ADAMTS16	0.316384	0.309576	0.00680791	0.0538456	0.104957	-0.0511115	#N/A	#N/A	#N/A	0.0709553	0.0957838	-0.0248285	0.506658	0.760968	-0.25431	0.431213	0.726997	-0.295784	0	No	No	2
ADAMTS18	0.29564	0.43695	-0.14131	0.103563	0.112586	-0.0090231	0.0582668	0.0372824	0.0209844	0.0582668	0.0372824	0.0209844	0.319184	0.627994	-0.30881	0.343295	0.836323	-0.493028	0	No	No	2
ADAMTS9	0.0513491	0.0574078	-0.0060587	0.00923273	0.0129754	-0.0037427	#N/A	#N/A	#N/A	0.0658307	0.0724097	-0.00657904	0.34218	0.379719	-0.0375386	0.586401	0.821276	-0.234875	0	Yes	No	1
ADAMTSL3	0.147629	0.205222	-0.0575935	#N/A	#N/A	#N/A	0.269607	0.206284	0.063323	0.038688	0.0200347	0.0186533	0.586452	0.768572	-0.182119	0.575081	0.926288	-0.351207	0	Yes	No	1
ADAMTSL5	0.217923	0.271168	-0.0532444	0.00588889	0.00632717	-0.000438286	0.143482	0.184866	-0.0413838	0.0563728	0.0606565	-0.00428372	0.346377	0.489344	-0.142967	0.451312	0.786063	-0.334751	0	No	No	1
ADAR	0.272427	0.253157	0.0192707	0.0374268	0.0421807	-0.00475391	0.300813	0.300009	0.000803934	#N/A	#N/A	#N/A	0.30622	0.27524	0.0309794	0.803577	0.5191	0.284477	1	No	No	0
ADARB2	0.0619373	0.0725148	-0.0105775	0.076655	0.0683642	0.0082908	0.108869	0.091493	0.0173759	0.108869	0.091493	0.0173759	0.329717	0.760752	-0.431035	0.495095	0.88512	-0.390025	0	Yes	No	2
ADCK5	0.144896	0.387251	-0.242355	0.0121761	0.0164218	-0.00424569	#N/A	#N/A	#N/A	#N/A	#N/A	#N/A	0.615925	0.625343	-0.00941832	0.919768	0.914573	0.0051955	0	No	No	1
ADCY2	0.40952	0.315146	0.0943739	#N/A	#N/A	#N/A	#N/A	#N/A	#N/A	0.0889319	0.0665333	0.0223986	0.352113	0.639828	-0.287715	0.399305	0.770708	-0.371403	0	No	No	2
ADCY3	0.0931663	0.0620418	0.0311245	0.431681	0.192906	0.238774	0.668894	0.38092	0.287975	0.814903	0.545154	0.269749	0.763782	0.734478	0.029304	0.904802	0.873342	0.0314595	3	No	No	0
ADCY8	0.109193	0.0941701	0.0150227	0.0636743	0.0821946	-0.0185204	0.0829669	0.0752144	0.0077525	0.179601	0.139382	0.0402193	0.282818	0.559883	-0.277065	#N/A	#N/A	#N/A	0	Yes	No	1
ADCYAP1	0.0539031	0.0842894	-0.0303863	0.0549887	0.0732006	-0.018212	0.0730564	0.0992769	-0.0262204	0.104326	0.130337	-0.0260107	0.217501	0.151764	0.0657373	0.228341	0.630934	-0.402593	0	Yes	No	1
ADCYAP1R1	0.0868448	0.167199	-0.0803539	#N/A	#N/A	#N/A	0.258344	0.452813	-0.194469	#N/A	#N/A	#N/A	0.432247	0.848651	-0.416405	#N/A	#N/A	#N/A	0	No	No	1
ADD2	0.424139	0.472015	-0.0478762	0.0320941	0.0323093	-0.000215141	0.485296	0.579129	-0.0938325	0.0481259	0.0521499	-0.00402402	0.689497	0.804686	-0.115188	0.587863	0.801849	-0.213986	0	No	No	1
ADH1A	0.603297	0.814246	-0.210949	#N/A	#N/A	#N/A	#N/A	#N/A	#N/A	#N/A	#N/A	#N/A	#N/A	#N/A	#N/A	#N/A	#N/A	#N/A	0	No	No	1
ADH1B	0.446177	0.475508	-0.0293317	#N/A	#N/A	#N/A	#N/A	#N/A	#N/A	#N/A	#N/A	#N/A	0.545814	0.683706	-0.137892	0.559647	0.857239	-0.297591	0	No	No	1
ADH7	0.414907	0.891654	-0.476747	#N/A	#N/A	#N/A	0.524166	0.892475	-0.368308	0.524166	0.892475	-0.368308	#N/A	#N/A	#N/A	#N/A	#N/A	#N/A	0	No	No	3
ADHFE1	0.619103	0.657841	-0.0387375	0.252993	0.0616987	0.191294	0.239329	0.0209535	0.218376	0.239329	0.0209535	0.218376	0.363418	0.409111	-0.0456929	0.875719	0.924152	-0.0484327	2	No	No	0
ADIG	0.461473	0.741029	-0.279556	#N/A	#N/A	#N/A	0.643173	0.698128	-0.0549553	0.669548	0.787934	-0.118386	0.194398	0.560626	-0.366227	0.340807	0.904498	-0.563691	0	No	No	3
ADIPOQ	0.462677	0.874431	-0.411753	0.398182	0.793001	-0.394819	0.251958	0.310391	-0.0584332	#N/A	#N/A	#N/A	0.457979	0.900441	-0.442463	#N/A	#N/A	#N/A	0	No	No	3
ADM	0.0944059	0.287465	-0.193059	0.0275735	0.0301002	-0.00252661	0.0391458	0.0458603	-0.0067145	0.0483533	0.0568344	-0.00848108	0.394663	0.159337	0.235326	0.326638	0.332401	-0.00576295	1	Yes	No	0
ADM2	0.337007	0.119884	0.217123	0.038166	0.0367542	0.00141179	0.0286209	0.0358961	-0.00727516	0.0286209	0.0358961	-0.00727516	0.261469	0.332393	-0.0709248	0.584796	0.720926	-0.13613	1	No	No	0
ADORA3	0.696694	0.780637	-0.0839431	0.29798	0.512284	-0.214304	0.831768	0.866397	-0.0346289	0.831768	0.866397	-0.0346289	0.514766	0.595712	-0.080946	0.770227	0.880873	-0.110646	0	No	No	1
ADRA1A	0.188277	0.0858887	0.102388	0.597281	0.24899	0.348291	0.688777	0.325563	0.363215	0.697975	0.356284	0.341691	0.448951	0.738849	-0.289898	0.635788	0.89496	-0.259173	3	Yes	No	2
ADRA1D	0.180566	0.232143	-0.0515768	#N/A	#N/A	#N/A	0.119089	0.115181	0.00390837	0.314889	0.275634	0.0392546	0.729106	0.720963	0.00814247	0.604981	0.293854	0.311127	1	Yes	No	0
ADRA2C	0.115311	0.219838	-0.104526	0.0211973	0.0109812	0.0102161	#N/A	#N/A	#N/A	0.267096	0.324251	-0.0571554	#N/A	#N/A	#N/A	0.239855	0.490481	-0.250626	0	No	No	1
ADRB3	0.628293	0.543009	0.0852839	0.541412	0.256485	0.284926	0.634541	0.11864	0.5159	0.573197	0.0891579	0.484039	0.833672	0.754765	0.0789069	#N/A	#N/A	#N/A	3	Yes	No	0
ADSS	0.735788	0.94669	-0.210902	0.0346399	0.047559	-0.0129191	0.0274285	0.0305925	-0.00316399	0.0274285	0.0305925	-0.00316399	0.477371	0.522259	-0.0448873	#N/A	#N/A	#N/A	0	No	No	1
AFF2	0.459489	0.620317	-0.160829	0.285855	0.482263	-0.196408	0.385578	0.629497	-0.243919	0.438942	0.707513	-0.268571	0.441011	0.611388	-0.170377	#N/A	#N/A	#N/A	0	No	No	2
AFM	0.660431	0.936094	-0.275663	#N/A	#N/A	#N/A	#N/A	#N/A	#N/A	#N/A	#N/A	#N/A	#N/A	#N/A	#N/A	0.522649	0.916336	-0.393687	0	No	No	2
AFP	0.479422	0.922277	-0.442855	#N/A	#N/A	#N/A	#N/A	#N/A	#N/A	#N/A	#N/A	#N/A	0.410519	0.472219	-0.0617002	#N/A	#N/A	#N/A	0	No	No	1
AGA	0.22731	0.324021	-0.0967109	0.042594	0.0429979	-0.000403973	#N/A	#N/A	#N/A	0.066324	0.0717513	-0.00542722	0.402019	0.443143	-0.0411235	0.645415	0.924285	-0.27887	0	No	No	1
AGAP11	0.616391	0.238487	0.377904	0.49757	0.138015	0.359555	0.316963	0.286018	0.030945	0.0621298	0.0547237	0.00740615	0.723643	0.816124	-0.0924815	#N/A	#N/A	#N/A	2	No	No	0
AGAP4	0.803635	0.901724	-0.0980885	#N/A	#N/A	#N/A	#N/A	#N/A	#N/A	#N/A	#N/A	#N/A	0.666868	0.879907	-0.213039	#N/A	#N/A	#N/A	0	No	No	1
AGAP5	0.67995	0.787199	-0.107249	0.890355	0.965849	-0.0754937	#N/A	#N/A	#N/A	0.62809	0.842555	-0.214464	0.667628	0.791704	-0.124076	#N/A	#N/A	#N/A	0	No	No	1
AGAP6	0.578138	0.818876	-0.240738	#N/A	#N/A	#N/A	0.758582	0.770447	-0.0118656	0.758582	0.770447	-0.0118656	0.535829	0.596979	-0.0611496	0.71	0.802688	-0.0926882	0	No	No	1
AGAP7	0.661345	0.888802	-0.227457	#N/A	#N/A	#N/A	#N/A	#N/A	#N/A	#N/A	#N/A	#N/A	0.565036	0.743651	-0.178614	#N/A	#N/A	#N/A	0	No	No	1
AGAP8	#N/A	#N/A	#N/A	#N/A	#N/A	#N/A	#N/A	#N/A	#N/A	#N/A	#N/A	#N/A	0.578249	0.780748	-0.202499	#N/A	#N/A	#N/A	0	No	No	1
AGBL1	0.481476	0.803526	-0.322049	0.625914	0.923446	-0.297532	0.502099	0.857508	-0.35541	0.504692	0.819948	-0.315256	0.39856	0.811935	-0.413375	#N/A	#N/A	#N/A	0	No	No	5
AGBL3	0.0977402	0.0960198	0.00172042	0.0481175	0.0651838	-0.0170663	0.0307082	0.0362604	-0.0055522	0.00254769	0.00509097	-0.00254328	0.695244	0.757502	-0.062258	0.600166	0.927078	-0.326912	0	No	No	1
AGPAT3	0.379739	0.330605	0.0491339	0.685786	0.406107	0.279679	0.728637	0.683423	0.0452137	#N/A	#N/A	#N/A	0.877915	0.836354	0.0415604	0.889365	0.839358	0.0500066	1	No	No	0
AGPAT9	0.0540593	0.0588301	-0.00477082	0.030784	0.0408402	-0.0100562	0.0449538	0.0424363	0.00251749	0.0566207	0.0468642	0.00975645	0.388423	0.420289	-0.0318658	0.386737	0.754751	-0.368014	0	No	No	1
AGPS	0.021163	0.0292056	-0.0080426	0.0344388	0.0533453	-0.0189065	#N/A	#N/A	#N/A	0.00966902	0.0134651	-0.00379612	0.536594	0.55023	-0.0136362	0.288578	0.665331	-0.376753	0	No	No	1
AGR2	0.891348	0.902132	-0.0107847	0.181777	0.674096	-0.492319	0.823044	0.911433	-0.0883887	0.872136	0.914448	-0.042312	0.8685	0.904877	-0.0363765	#N/A	#N/A	#N/A	0	No	No	1
AGTPBP1	0.219434	0.515549	-0.296115	0.060986	0.0870573	-0.0260713	0.322726	0.261673	0.0610532	0.0458945	0.049682	-0.00378747	0.626968	0.631269	-0.0043014	#N/A	#N/A	#N/A	0	No	No	1
AGTR2	#N/A	#N/A	#N/A	#N/A	#N/A	#N/A	#N/A	#N/A	#N/A	#N/A	#N/A	#N/A	0.227197	0.44911	-0.221913	#N/A	#N/A	#N/A	0	No	No	1
AGXT	0.320142	0.57866	-0.258519	0.567748	0.774098	-0.20635	0.460712	0.719405	-0.258693	0.460712	0.719405	-0.258693	0.677282	0.884313	-0.207031	#N/A	#N/A	#N/A	0	No	No	5
AGXT2	0.703612	0.890679	-0.187067	0.70113	0.850192	-0.149062	#N/A	#N/A	#N/A	0.764213	0.907055	-0.142842	0.479851	0.723931	-0.24408	0.276514	0.857363	-0.58085	0	No	No	2
AHCTF1	0.075503	0.168039	-0.0925363	#N/A	#N/A	#N/A	0.267299	0.505478	-0.238179	0.267299	0.505478	-0.238179	0.409978	0.476153	-0.0661758	0.896586	0.944221	-0.0476351	0	No	No	2
AHSG	0.211912	0.898535	-0.686623	0.387446	0.86138	-0.473934	0.221625	0.740176	-0.518551	0.319729	0.78855	-0.468821	0.0501561	0.0577263	-0.00757021	0.683375	0.916566	-0.233191	0	No	No	5
AHSP	0.579453	0.69231	-0.112857	0.318356	0.622657	-0.304302	0.603419	0.874305	-0.270886	0.603419	0.874305	-0.270886	#N/A	#N/A	#N/A	#N/A	#N/A	#N/A	0	No	No	3
AICDA	0.628935	0.848558	-0.219623	#N/A	#N/A	#N/A	#N/A	#N/A	#N/A	#N/A	#N/A	#N/A	0.655107	0.775398	-0.120291	0.371721	0.778028	-0.406308	0	No	No	2
AIFM1	0.409932	0.516197	-0.106265	0.316923	0.497346	-0.180423	0.344409	0.602839	-0.25843	0.335573	0.575596	-0.240023	0.582079	0.746198	-0.164119	0.61635	0.761788	-0.145438	0	No	No	2
AIFM3	0.71919	0.686812	0.0323777	0.385378	0.424459	-0.0390817	0.552646	0.53926	0.0133863	0.64778	0.613455	0.0343244	0.508884	0.508936	-5.24325e-05	0.350549	0.63694	-0.286391	0	No	No	1
AIM1L	0.582071	0.7934	-0.211329	0.734383	0.837392	-0.103009	0.602476	0.865628	-0.263152	0.602476	0.865628	-0.263152	0.472967	0.473906	-0.000938655	#N/A	#N/A	#N/A	0	No	No	3
AIM2	0.515725	0.841969	-0.326244	0.623911	0.905809	-0.281898	0.566375	0.72412	-0.157745	0.285303	0.452507	-0.167204	0.650224	0.74002	-0.089796	#N/A	#N/A	#N/A	0	No	No	2
AIP	0.0831038	0.398059	-0.314955	0.0378215	0.0409361	-0.00311467	0.0118609	0.0272626	-0.0154018	0.0118609	0.0272626	-0.0154018	0.769817	0.735201	0.0346162	#N/A	#N/A	#N/A	0	No	No	1
AIPL1	0.448174	0.533791	-0.0856171	0.544541	0.710691	-0.16615	0.368305	0.467426	-0.099121	0.270531	0.37867	-0.108139	0.570988	0.780697	-0.209709	0.170744	0.758964	-0.588219	0	No	No	2
AJAP1	0.233367	0.0896392	0.143728	0.0823387	0.0751113	0.00722736	0.0850378	0.0707493	0.0142885	0.0850378	0.0707493	0.0142885	0.248381	0.6526	-0.404219	0.301397	0.857754	-0.556357	0	No	No	2
AK7	0.0485622	0.0538544	-0.00529214	0.0357596	0.0536994	-0.0179399	0.0435391	0.039315	0.00422415	0.0435391	0.039315	0.00422415	0.329562	0.452878	-0.123317	0.200378	0.61953	-0.419152	0	No	No	1
AKAP14	0.275354	0.660355	-0.385	0.486029	0.630627	-0.144599	0.157996	0.376863	-0.218866	#N/A	#N/A	#N/A	0.748761	0.921096	-0.172335	0.691171	0.92356	-0.23239	0	No	No	3
AKAP2	0.783138	0.343746	0.439392	0.0528171	0.113939	-0.0611221	0.190312	0.228805	-0.0384932	#N/A	#N/A	#N/A	0.560778	0.558388	0.00239033	0.911498	0.914914	-0.00341627	1	No	No	0
AKAP3	0.586613	0.914254	-0.32764	#N/A	#N/A	#N/A	0.440818	0.898603	-0.457785	0.440818	0.898603	-0.457785	0.334337	0.847179	-0.512842	0.889012	0.86772	0.0212926	0	No	No	4
AKAP4	0.43884	0.818763	-0.379924	0.596665	0.912373	-0.315709	0.260118	0.412823	-0.152705	0.260118	0.412823	-0.152705	0.443182	0.741943	-0.298761	#N/A	#N/A	#N/A	0	No	No	3
AKAP6	0.751585	0.812878	-0.0612928	0.746857	0.724148	0.0227092	0.676372	0.757183	-0.0808114	#N/A	#N/A	#N/A	0.527154	0.730723	-0.203569	0.459002	0.68686	-0.227857	0	No	No	2
AKAP7	#N/A	#N/A	#N/A	0.100656	0.192011	-0.0913545	0.130789	0.195026	-0.064237	0.130789	0.195026	-0.064237	0.503309	0.56938	-0.0660704	0.837878	0.494881	0.342997	1	No	No	0
AKIRIN2	0.137338	0.363789	-0.226451	0.0337724	0.0529174	-0.0191451	0.0224842	0.0290495	-0.00656529	0.0224842	0.0290495	-0.00656529	0.191852	0.203322	-0.0114704	0.908078	0.903948	0.00413073	0	No	No	1
AKR1B10	0.833866	0.895452	-0.0615861	0.240071	0.302382	-0.0623105	0.395718	0.659606	-0.263888	0.395718	0.659606	-0.263888	0.289066	0.502798	-0.213732	0.508601	0.910547	-0.401946	0	No	No	4
AKR1B15	0.550011	0.786733	-0.236722	0.406292	0.710024	-0.303733	#N/A	#N/A	#N/A	0.317477	0.522432	-0.204955	0.209499	0.613582	-0.404083	#N/A	#N/A	#N/A	0	No	No	4
AKR1C1	0.639769	0.867834	-0.228064	#N/A	#N/A	#N/A	0.192405	0.215812	-0.023407	0.192405	0.215812	-0.023407	0.848932	0.949415	-0.100483	#N/A	#N/A	#N/A	0	No	No	1
AKR1C2	0.27458	0.433804	-0.159224	0.248054	0.326261	-0.0782069	0.259703	0.459817	-0.200114	#N/A	#N/A	#N/A	0.692449	0.917451	-0.225002	0.681906	0.925274	-0.243368	0	No	No	3
AKR1C3	0.827329	0.930833	-0.103504	#N/A	#N/A	#N/A	#N/A	#N/A	#N/A	#N/A	#N/A	#N/A	0.02713	0.274271	-0.247141	0.49804	0.893822	-0.395782	0	No	No	2
AKR1C4	0.247382	0.771477	-0.524095	#N/A	#N/A	#N/A	#N/A	#N/A	#N/A	0.246578	0.888632	-0.642054	0.159329	0.840767	-0.681438	0.264278	0.838496	-0.574219	0	No	No	4
AKR1CL1	0.262161	0.66712	-0.40496	0.363805	0.796656	-0.432852	#N/A	#N/A	#N/A	#N/A	#N/A	#N/A	0.144362	0.756917	-0.612555	#N/A	#N/A	#N/A	0	No	No	3
AKR1D1	0.344504	0.81489	-0.470386	0.376298	0.750725	-0.374427	#N/A	#N/A	#N/A	0.860319	0.938705	-0.0783864	0.501119	0.721124	-0.220004	0.291843	0.495089	-0.203246	0	No	No	4
AKR7A3	0.406809	0.242627	0.164182	0.430181	0.122945	0.307236	#N/A	#N/A	#N/A	0.458795	0.123924	0.334871	0.813108	0.807238	0.00586937	#N/A	#N/A	#N/A	2	No	No	0
AKR7L	0.67865	0.281756	0.396894	0.655866	0.158612	0.497254	#N/A	#N/A	#N/A	0.550813	0.196351	0.354462	0.77038	0.804656	-0.0342763	0.906524	0.899041	0.00748367	3	No	No	0
ALAS2	0.365278	0.66711	-0.301832	#N/A	#N/A	#N/A	0.470824	0.735266	-0.264443	0.413607	0.591798	-0.178191	0.290863	0.619326	-0.328464	#N/A	#N/A	#N/A	0	No	No	3
ALB	0.77355	0.946886	-0.173336	0.491159	0.874314	-0.383155	#N/A	#N/A	#N/A	#N/A	#N/A	#N/A	0.424175	0.838041	-0.413866	0.573525	0.835533	-0.262007	0	No	No	3
ALDH1L1	0.176021	0.20122	-0.0251995	0.0759778	0.0386249	0.0373529	0.231057	0.183362	0.0476957	0.12102	0.0403736	0.0806467	0.592361	0.808775	-0.216414	0.710865	0.871481	-0.160616	0	Yes	No	1
ALDH2	0.860592	0.882019	-0.0214262	0.242625	0.381792	-0.139167	0.0366182	0.0497801	-0.0131619	0.0328513	0.0410706	-0.00821925	0.385162	0.407504	-0.0223418	0.395003	0.787786	-0.392784	0	No	No	1
ALDH3A1	0.563603	0.677839	-0.114236	0.589895	0.483973	0.105922	0.618747	0.572298	0.0464486	0.471335	0.265093	0.206242	0.23875	0.195503	0.0432473	0.794901	0.953456	-0.158556	1	Yes	No	0
ALDH3B2	0.509512	0.739177	-0.229664	0.278775	0.548674	-0.269899	0.378086	0.670049	-0.291963	0.503903	0.803801	-0.299898	0.442301	0.762024	-0.319724	0.724978	0.8489	-0.123922	0	No	No	5
ALDOA	0.201632	0.236997	-0.0353648	0.0870796	0.0845731	0.00250645	0.187002	0.180066	0.00693623	0.122902	0.161505	-0.0386025	0.405454	0.829521	-0.424067	#N/A	#N/A	#N/A	0	Yes	No	1
ALDOB	0.447846	0.667227	-0.219381	#N/A	#N/A	#N/A	0.347466	0.664786	-0.31732	#N/A	#N/A	#N/A	0.621094	0.828193	-0.207099	#N/A	#N/A	#N/A	0	No	No	3
ALG1L	0.52933	0.752949	-0.22362	#N/A	#N/A	#N/A	0.657308	0.807625	-0.150317	#N/A	#N/A	#N/A	0.794726	0.822035	-0.0273083	0.217371	0.13637	0.0810016	0	No	No	1
ALG1L2	0.454826	0.552126	-0.0972998	0.524253	0.711008	-0.186756	#N/A	#N/A	#N/A	#N/A	#N/A	#N/A	0.508693	0.745908	-0.237215	#N/A	#N/A	#N/A	0	No	No	1
ALKBH7	0.462589	0.719807	-0.257218	0.243199	0.342497	-0.099298	0.0362659	0.0510606	-0.0147947	0.0362659	0.0510606	-0.0147947	0.0218658	0.0281544	-0.0062886	#N/A	#N/A	#N/A	0	No	No	1
ALLC	0.657645	0.823193	-0.165549	0.717055	0.906864	-0.189808	0.47544	0.882588	-0.407147	#N/A	#N/A	#N/A	0.335043	0.857339	-0.522296	0.56867	0.913105	-0.344435	0	No	No	3
ALMS1P	0.518274	0.643766	-0.125492	0.353626	0.670521	-0.316895	#N/A	#N/A	#N/A	#N/A	#N/A	#N/A	0.223634	0.28473	-0.0610962	#N/A	#N/A	#N/A	0	No	No	1
ALOX12B	0.393479	0.750116	-0.356637	0.464226	0.492485	-0.0282588	0.743	0.875947	-0.132948	0.499035	0.816722	-0.317687	0.170652	0.168148	0.00250465	0.29952	0.192464	0.107057	0	No	No	2
ALOX12P2	0.703844	0.895529	-0.191685	0.321943	0.719703	-0.39776	#N/A	#N/A	#N/A	#N/A	#N/A	#N/A	0.465783	0.391794	0.0739887	#N/A	#N/A	#N/A	0	No	No	1
ALOX15	0.423499	0.480888	-0.0573886	0.186152	0.169592	0.0165595	#N/A	#N/A	#N/A	0.087101	0.0724648	0.0146362	0.248086	0.293949	-0.0458637	0.554031	0.794323	-0.240292	0	Yes	No	1
ALOX15B	0.623876	0.620218	0.00365757	0.266039	0.100148	0.16589	0.548112	0.271099	0.277013	0.358987	0.185007	0.17398	0.433751	0.237147	0.196604	0.808665	0.823734	-0.0150687	1	No	No	0
ALOX5	0.104401	0.0941329	0.0102682	0.105494	0.0897472	0.0157468	0.0715922	0.0307615	0.0408306	0.147849	0.0710561	0.0767934	0.322533	0.540057	-0.217524	0.250219	0.641728	-0.391509	0	Yes	No	2
ALOXE3	0.041752	0.0512228	-0.00947083	0.0526553	0.0655833	-0.012928	0.0660191	0.053909	0.01211	0.0663727	0.0666157	-0.00024297	0.367987	0.372816	-0.00482825	0.385364	0.731357	-0.345993	0	Yes	No	1
ALPI	0.434405	0.875354	-0.440949	0.441501	0.819037	-0.377535	0.772027	0.869145	-0.0971178	0.772027	0.869145	-0.0971178	0.498401	0.710211	-0.21181	0.45139	0.512621	-0.0612312	0	No	No	3
ALPK2	0.276983	0.522764	-0.245782	0.42148	0.611068	-0.189588	0.584403	0.695728	-0.111325	0.29428	0.538743	-0.244463	0.404498	0.751878	-0.34738	0.941219	0.945	-0.0037816	0	No	No	3
ALPK3	0.815706	0.879368	-0.0636614	0.868571	0.818938	0.0496324	0.811909	0.762038	0.0498707	0.846359	0.564943	0.281416	0.776287	0.744981	0.0313068	0.846499	0.93348	-0.0869812	1	No	No	0
ALPL	0.358947	0.576674	-0.217727	0.143974	0.189063	-0.0450895	0.442211	0.558976	-0.116766	0.0185674	0.0375563	-0.018989	0.181042	0.2642	-0.0831572	0.541705	0.471864	0.0698407	0	No	No	1
ALPP	0.655999	0.899924	-0.243925	0.660845	0.841507	-0.180663	0.350522	0.686917	-0.336394	0.350522	0.686917	-0.336394	0.339951	0.505063	-0.165112	0.129113	0.213501	-0.0843884	0	No	No	3
ALPPL2	0.55871	0.787607	-0.228897	#N/A	#N/A	#N/A	0.879523	0.919918	-0.0403956	0.879523	0.919918	-0.0403956	0.460935	0.749391	-0.288456	0.326464	0.55723	-0.230766	0	Yes	No	3
ALS2CR12	0.859754	0.928397	-0.0686431	0.548513	0.421919	0.126594	0.796229	0.733266	0.0629631	0.870956	0.894748	-0.0237921	0.507161	0.73855	-0.231389	0.910134	0.914584	-0.00444993	0	No	No	1
ALS2CR4	0.117159	0.16474	-0.0475808	0.0403582	0.049581	-0.00922278	0.0375816	0.067833	-0.0302515	0.0375816	0.067833	-0.0302515	0.201143	0.259856	-0.0587126	0.645554	0.919922	-0.274368	0	No	No	1
ALX1	0.598385	0.347291	0.251094	0.288515	0.0624456	0.226069	#N/A	#N/A	#N/A	0.0729389	0.0842196	-0.0112807	0.198819	0.222429	-0.0236098	#N/A	#N/A	#N/A	2	No	No	0
ALX3	0.549628	0.631202	-0.0815736	0.0521423	0.0334466	0.0186957	#N/A	#N/A	#N/A	0.244007	0.099086	0.144921	0.766985	0.541262	0.225723	0.794277	0.732198	0.0620794	1	Yes	No	0
AMAC1L2	#N/A	#N/A	#N/A	0.768124	0.81952	-0.051396	#N/A	#N/A	#N/A	0.765252	0.867382	-0.10213	#N/A	#N/A	#N/A	0.601295	0.80604	-0.204745	0	No	No	1
AMBN	0.714255	0.912078	-0.197823	0.244872	0.375935	-0.131063	#N/A	#N/A	#N/A	#N/A	#N/A	#N/A	0.19017	0.548689	-0.35852	#N/A	#N/A	#N/A	0	No	No	1
AMFR	0.488583	0.49224	-0.00365674	#N/A	#N/A	#N/A	#N/A	#N/A	#N/A	0.039089	0.0479131	-0.00882404	0.729859	0.688377	0.0414824	0.549069	0.259375	0.289694	1	No	No	0
AMH	0.849362	0.879993	-0.0306314	0.817358	0.807643	0.00971553	0.64393	0.623526	0.0204039	0.64393	0.623526	0.0204039	0.698438	0.123359	0.575079	0.752208	0.29081	0.461398	2	No	No	0
AMICA1	0.474399	0.804489	-0.33009	0.393974	0.69232	-0.298346	0.541359	0.75777	-0.216411	0.640933	0.750978	-0.110045	0.512008	0.717146	-0.205137	0.734989	0.860596	-0.125607	0	No	No	4
AMIGO2	0.0705401	0.0638464	0.00669362	0.0247854	0.0463167	-0.0215313	0.0218607	0.0250708	-0.00321001	0.0128542	0.0135525	-0.000698352	0.358305	0.502536	-0.144231	0.573393	0.849192	-0.275799	0	Yes	No	1
AMMECR1	0.27794	0.389478	-0.111538	0.248739	0.42513	-0.17639	0.257906	0.470533	-0.212627	0.395604	0.548413	-0.152808	0.406782	0.57753	-0.170748	0.683409	0.716263	-0.0328543	0	No	No	1
AMN	0.560382	0.77092	-0.210538	0.681462	0.780042	-0.0985797	0.376032	0.442268	-0.0662363	0.376032	0.442268	-0.0662363	0.367778	0.296328	0.07145	0.290949	0.182026	0.108924	0	Yes	No	1
AMOTL1	0.308242	0.40438	-0.096138	0.0258506	0.032447	-0.00659642	0.0318247	0.0435229	-0.0116982	0.027438	0.0368684	-0.00943043	0.524267	0.555344	-0.0310771	0.351631	0.627024	-0.275392	0	No	No	1
AMT	0.878802	0.870976	0.00782505	0.769889	0.439043	0.330846	0.758312	0.413917	0.344395	0.762713	0.406266	0.356447	0.736612	0.510427	0.226185	0.924846	0.905933	0.0189128	4	No	No	0
AMTN	0.261707	0.769778	-0.508071	#N/A	#N/A	#N/A	0.219889	0.815571	-0.595682	0.219889	0.815571	-0.595682	0.503334	0.855956	-0.352622	#N/A	#N/A	#N/A	0	No	No	4
AMY1A	0.597846	0.886537	-0.288691	#N/A	#N/A	#N/A	#N/A	#N/A	#N/A	#N/A	#N/A	#N/A	#N/A	#N/A	#N/A	#N/A	#N/A	#N/A	0	No	No	1
AMY1B	0.597846	0.886537	-0.288691	#N/A	#N/A	#N/A	#N/A	#N/A	#N/A	#N/A	#N/A	#N/A	#N/A	#N/A	#N/A	#N/A	#N/A	#N/A	0	No	No	1
AMY1C	0.597846	0.886537	-0.288691	#N/A	#N/A	#N/A	#N/A	#N/A	#N/A	#N/A	#N/A	#N/A	#N/A	#N/A	#N/A	#N/A	#N/A	#N/A	0	No	No	1
AMY2A	#N/A	#N/A	#N/A	#N/A	#N/A	#N/A	#N/A	#N/A	#N/A	#N/A	#N/A	#N/A	0.624404	0.896927	-0.272524	#N/A	#N/A	#N/A	0	No	No	1
AMY2B	0.947829	0.952637	-0.00480838	#N/A	#N/A	#N/A	0.681934	0.866445	-0.184511	0.465937	0.756033	-0.290096	#N/A	#N/A	#N/A	#N/A	#N/A	#N/A	0	No	No	1
ANGEL2	0.710392	0.93601	-0.225618	0.0475495	0.0507354	-0.00318588	0.0225691	0.023391	-0.00082197	0.0225691	0.023391	-0.00082197	0.140068	0.18998	-0.0499117	0.945347	0.937849	0.0074981	0	No	No	1
ANGPT1	0.629043	0.654305	-0.0252623	0.144003	0.461238	-0.317235	0.0562942	0.0459363	0.0103579	0.0503036	0.0425291	0.00777447	0.566286	0.781882	-0.215596	0.619806	0.90593	-0.286124	0	No	No	3
ANGPT4	0.289911	0.459206	-0.169295	0.0687123	0.0985839	-0.0298716	0.153496	0.262879	-0.109383	0.338718	0.526668	-0.18795	0.17343	0.321963	-0.148534	0.336179	0.707085	-0.370906	0	No	No	1
ANGPTL6	0.850325	0.844561	0.00576416	0.314783	0.362194	-0.0474113	0.618887	0.62068	-0.00179229	0.813809	0.66472	0.149089	0.174224	0.13982	0.0344035	0.63612	0.854081	-0.217961	0	No	No	1
ANKFN1	0.688329	0.846239	-0.15791	0.362156	0.482866	-0.120709	#N/A	#N/A	#N/A	0.360966	0.766422	-0.405456	0.40406	0.607971	-0.203911	#N/A	#N/A	#N/A	0	No	No	2
ANKK1	0.362365	0.362523	-0.000158133	0.422917	0.280908	0.142009	#N/A	#N/A	#N/A	0.23523	0.0283247	0.206905	0.536459	0.572308	-0.0358485	0.444699	0.866578	-0.421879	1	No	No	1
ANKRD12	0.0579092	0.04447	0.0134391	0.0113416	0.0167622	-0.00542057	0.257454	0.264677	-0.00722297	0.0721932	0.0901514	-0.0179582	0.909819	0.52309	0.386729	0.929474	0.768154	0.16132	1	No	No	0
ANKRD20B	0.408805	0.404814	0.00399037	0.183336	0.177405	0.00593047	#N/A	#N/A	#N/A	#N/A	#N/A	#N/A	0.28397	0.623175	-0.339205	#N/A	#N/A	#N/A	0	No	No	1
ANKRD22	0.817669	0.833637	-0.0159683	0.733229	0.793821	-0.0605916	0.31635	0.548913	-0.232563	0.31635	0.548913	-0.232563	0.456072	0.579231	-0.12316	0.635044	0.790918	-0.155874	0	No	No	2
ANKRD23	0.83273	0.840813	-0.00808316	0.92679	0.91408	0.0127096	#N/A	#N/A	#N/A	#N/A	#N/A	#N/A	0.852669	0.632046	0.220623	0.909027	0.621517	0.287511	2	No	No	0
ANKRD24	0.0659843	0.0914122	-0.0254279	0.200764	0.600591	-0.399827	0.347948	0.649968	-0.30202	0.493221	0.814602	-0.321381	0.45205	0.612419	-0.160368	0.280335	0.427644	-0.147309	0	No	No	3
ANKRD29	0.433766	0.198216	0.23555	0.056957	0.0707948	-0.0138378	#N/A	#N/A	#N/A	#N/A	#N/A	#N/A	0.263442	0.275866	-0.012424	0.897334	0.93095	-0.0336162	1	No	No	0
ANKRD33B	0.45568	0.231101	0.224579	0.0336047	0.0455056	-0.0119009	0.00995893	0.0165711	-0.00661218	0.0213496	0.032673	-0.0113234	0.690779	0.686888	0.00389135	0.670158	0.680399	-0.0102417	1	No	No	0
ANKRD34B	0.652366	0.877434	-0.225068	0.155589	0.0755443	0.0800452	0.28799	0.433474	-0.145483	0.0347242	0.0275423	0.00718187	0.866524	0.927381	-0.0608567	#N/A	#N/A	#N/A	0	No	No	1
ANKRD34C	0.288482	0.259837	0.0286449	0.0357707	0.0459808	-0.0102102	0.229476	0.413697	-0.184221	0.259868	0.238805	0.0210635	0.620425	0.912843	-0.292418	0.796609	0.923606	-0.126997	0	No	No	1
ANKRD45	0.47799	0.74577	-0.267779	0.119304	0.109275	0.0100298	0.350451	0.403179	-0.0527278	#N/A	#N/A	#N/A	0.525245	0.830703	-0.305457	0.819312	0.903401	-0.0840887	0	No	No	2
ANKRD46	0.469461	0.717303	-0.247842	0.0512609	0.0561187	-0.00485782	0.323216	0.328766	-0.00554922	#N/A	#N/A	#N/A	0.926029	0.939876	-0.0138478	0.9133	0.888724	0.0245753	0	No	No	1
ANKRD53	0.193955	0.250635	-0.0566793	0.0726726	0.0802067	-0.00753406	0.0228767	0.0491901	-0.0263134	0.0433864	0.0671774	-0.023791	0.720971	0.581802	0.139168	0.836909	0.590893	0.246015	1	No	No	0
ANKRD55	0.540848	0.670339	-0.12949	0.409045	0.558582	-0.149537	0.565376	0.66601	-0.100634	0.565376	0.66601	-0.100634	0.791175	0.804909	-0.0137337	0.844615	0.444249	0.400365	1	No	No	0
ANKS4B	0.267866	0.832501	-0.564635	0.348314	0.868215	-0.519901	#N/A	#N/A	#N/A	0.14126	0.857573	-0.716313	0.167998	0.819799	-0.651801	#N/A	#N/A	#N/A	0	No	No	4
ANO2	0.361159	0.780437	-0.419277	0.36931	0.831034	-0.461724	#N/A	#N/A	#N/A	#N/A	#N/A	#N/A	0.302233	0.616019	-0.313786	0.590231	0.878305	-0.288074	0	No	No	4
ANO3	0.218094	0.687079	-0.468984	0.0326622	0.0671034	-0.0344412	0.051305	0.0647459	-0.0134409	0.051305	0.0647459	-0.0134409	0.522951	0.755909	-0.232959	#N/A	#N/A	#N/A	0	No	No	2
ANO4	0.289174	0.449395	-0.160222	0.131799	0.195596	-0.0637976	0.183629	0.495427	-0.311798	0.0803441	0.0977438	-0.0173997	0.294489	0.583909	-0.28942	0.229766	0.67019	-0.440423	0	No	No	3
ANO5	0.171026	0.271428	-0.100401	0.0131455	0.0204655	-0.00732	0.0467764	0.0408833	0.00589315	0.0467764	0.0408833	0.00589315	0.149909	0.2912	-0.141291	0.436712	0.860121	-0.423409	0	No	No	1
ANO9	0.38497	0.418066	-0.033096	0.134052	0.124781	0.00927058	0.0679916	0.0507118	0.0172798	0.0679916	0.0507118	0.0172798	0.515702	0.767226	-0.251523	0.410093	0.772821	-0.362728	0	No	No	2
ANP32C	0.624692	0.886798	-0.262106	0.495446	0.550151	-0.0547056	#N/A	#N/A	#N/A	0.572865	0.880624	-0.307758	#N/A	#N/A	#N/A	#N/A	#N/A	#N/A	0	No	No	2
ANP32D	0.455207	0.771932	-0.316726	0.630667	0.941662	-0.310996	#N/A	#N/A	#N/A	0.685248	0.926786	-0.241538	#N/A	#N/A	#N/A	#N/A	#N/A	#N/A	0	No	No	3
ANTXRL	0.529178	0.703281	-0.174103	#N/A	#N/A	#N/A	#N/A	#N/A	#N/A	#N/A	#N/A	#N/A	0.524739	0.726692	-0.201952	#N/A	#N/A	#N/A	0	No	No	1
ANXA11	0.0672664	0.0630602	0.00420623	0.0413691	0.0498622	-0.00849307	0.520819	0.444447	0.0763714	0.00622544	0.00846117	-0.00223573	0.851116	0.780347	0.0707692	0.422135	0.79131	-0.369175	0	No	No	1
ANXA2P2	0.899257	0.900836	-0.00157847	0.0381728	0.0515114	-0.0133386	#N/A	#N/A	#N/A	#N/A	#N/A	#N/A	0.330981	0.873242	-0.542262	#N/A	#N/A	#N/A	0	No	No	1
ANXA2P3	#N/A	#N/A	#N/A	#N/A	#N/A	#N/A	#N/A	#N/A	#N/A	#N/A	#N/A	#N/A	0.22322	0.834905	-0.611685	#N/A	#N/A	#N/A	0	No	No	1
ANXA6	0.230906	0.280233	-0.0493279	0.0060104	0.0208882	-0.0148778	0.23696	0.209778	0.0271824	#N/A	#N/A	#N/A	0.720594	0.605916	0.114678	0.601184	0.367256	0.233928	1	No	No	0
ANXA9	0.871654	0.765362	0.106292	#N/A	#N/A	#N/A	0.528708	0.367378	0.16133	0.528708	0.367378	0.16133	0.609477	0.747573	-0.138096	0.771685	0.42559	0.346095	1	No	No	0
AOAH	0.438235	0.833807	-0.395572	0.195962	0.454181	-0.258219	0.383203	0.743302	-0.360099	0.383203	0.743302	-0.360099	0.380914	0.712182	-0.331268	0.657665	0.882752	-0.225087	0	No	No	6
AOC2	0.406495	0.378921	0.0275741	0.691063	0.432785	0.258278	#N/A	#N/A	#N/A	0.85625	0.652464	0.203786	0.79247	0.705405	0.0870649	0.427457	0.385544	0.0419124	2	No	No	0
AOX2P	0.577149	0.828396	-0.251247	0.728484	0.850761	-0.122278	#N/A	#N/A	#N/A	#N/A	#N/A	#N/A	0.583206	0.841086	-0.257881	#N/A	#N/A	#N/A	0	No	No	2
AP1S1	0.3155	0.590292	-0.274792	0.046636	0.104028	-0.0573917	0.046278	0.0686157	-0.0223377	0.046278	0.0686157	-0.0223377	0.464336	0.484434	-0.0200981	0.825654	0.865464	-0.03981	0	No	No	1
AP2S1	0.538435	0.755678	-0.217243	0.0363362	0.0418207	-0.00548452	0.0429916	0.0480357	-0.00504404	0.0429916	0.0480357	-0.00504404	0.266665	0.250253	0.0164123	0.820927	0.725991	0.0949355	0	No	No	1
APBB1IP	0.164754	0.514036	-0.349281	0.140649	0.125746	0.014903	0.177399	0.387854	-0.210455	0.212688	0.195447	0.0172407	0.281619	0.315468	-0.0338494	0.300119	0.349839	-0.0497207	0	Yes	No	2
APC2	0.21732	0.21256	0.00475976	0.017597	0.04056	-0.022963	0.269735	0.275966	-0.00623041	#N/A	#N/A	#N/A	0.629167	0.373749	0.255418	0.21783	0.203996	0.0138339	1	No	No	0
APCDD1	0.884836	0.405199	0.479637	#N/A	#N/A	#N/A	0.00827859	0.0131916	-0.004913	0.061562	0.0980655	-0.0365035	0.694925	0.696436	-0.00151125	0.454558	0.429755	0.0248027	1	Yes	No	0
APCS	0.276874	0.751586	-0.474712	0.319203	0.797464	-0.478261	0.285348	0.552788	-0.267439	0.285348	0.552788	-0.267439	0.365789	0.881507	-0.515718	0.29081	0.886839	-0.596029	0	No	No	6
APEH	0.0662293	0.185388	-0.119158	0.0212386	0.0327379	-0.0114994	0.00641237	0.0158489	-0.00943654	0.00641237	0.0158489	-0.00943654	0.551239	0.504918	0.0463212	0.785675	0.443039	0.342637	1	No	No	0
APLN	0.426572	0.626656	-0.200084	0.281552	0.431653	-0.150101	0.429403	0.502105	-0.072702	0.429403	0.502105	-0.072702	0.420633	0.553226	-0.132592	#N/A	#N/A	#N/A	0	No	No	1
APOA1	0.851755	0.870142	-0.0183864	0.735368	0.43371	0.301658	0.892496	0.556086	0.33641	0.837706	0.45759	0.380116	0.202209	0.183073	0.019136	0.161055	0.0809296	0.0801249	3	No	No	0
APOB	0.657024	0.870025	-0.213001	0.751206	0.756368	-0.00516185	#N/A	#N/A	#N/A	#N/A	#N/A	#N/A	0.377569	0.745249	-0.36768	#N/A	#N/A	#N/A	0	No	No	2
APOB48R	0.407341	0.691868	-0.284527	0.531332	0.668072	-0.136741	#N/A	#N/A	#N/A	#N/A	#N/A	#N/A	0.648559	0.806683	-0.158124	0.768185	0.855133	-0.0869481	0	Yes	No	1
APOBEC1	0.213918	0.812204	-0.598286	0.217785	0.798869	-0.581085	#N/A	#N/A	#N/A	#N/A	#N/A	#N/A	0.377978	0.870802	-0.492825	0.188952	0.858073	-0.669121	0	No	No	4
APOBEC2	0.70543	0.832781	-0.127351	0.43421	0.746324	-0.312114	0.412023	0.664453	-0.252429	0.355882	0.53445	-0.178568	0.433783	0.756573	-0.322791	0.915089	0.926196	-0.0111067	0	No	No	3
APOBEC3A	0.754423	0.874569	-0.120146	0.159113	0.573205	-0.414092	0.604574	0.831067	-0.226493	0.604574	0.831067	-0.226493	0.317115	0.762304	-0.445189	0.857797	0.952218	-0.094421	0	No	No	4
APOBEC3D	0.757766	0.651549	0.106217	#N/A	#N/A	#N/A	0.514299	0.256555	0.257744	0.514299	0.256555	0.257744	0.864449	0.794197	0.0702519	0.456493	0.480211	-0.0237181	2	No	No	0
APOBEC3F	0.714478	0.546803	0.167675	0.409066	0.431262	-0.0221962	0.0322411	0.0370654	-0.00482422	0.0322411	0.0370654	-0.00482422	0.414936	0.483759	-0.0688223	0.491918	0.787343	-0.295425	0	No	No	1
APOBEC3G	0.73162	0.766164	-0.0345445	#N/A	#N/A	#N/A	0.0679596	0.0353954	0.0325641	0.0679596	0.0353954	0.0325641	0.565922	0.73522	-0.169297	0.698477	0.911485	-0.213008	0	No	No	1
APOBEC3H	0.681116	0.817995	-0.136879	0.467744	0.462219	0.0055243	0.662387	0.72838	-0.065993	#N/A	#N/A	#N/A	0.605681	0.774221	-0.168541	0.668293	0.872184	-0.20389	0	No	No	1
APOC1	0.401336	0.541172	-0.139836	0.370866	0.51321	-0.142344	0.311466	0.616661	-0.305195	#N/A	#N/A	#N/A	0.0454342	0.0626612	-0.017227	0.766413	0.854973	-0.0885595	0	No	No	1
APOD	0.612456	0.724065	-0.111609	#N/A	#N/A	#N/A	0.370921	0.457903	-0.086982	0.370921	0.457903	-0.086982	0.833374	0.912675	-0.0793006	0.637786	0.883082	-0.245296	0	No	No	1
APOE	0.261359	0.532497	-0.271138	0.121276	0.125654	-0.0043783	0.103743	0.0806788	0.0230646	0.0583312	0.0564965	0.00183474	0.784461	0.741405	0.0430562	0.912767	0.902617	0.0101502	0	No	No	1
APOF	0.602499	0.747978	-0.145479	#N/A	#N/A	#N/A	0.891956	0.929727	-0.037771	0.891956	0.929727	-0.037771	0.902625	0.908696	-0.00607077	0.476714	0.885875	-0.409162	0	No	No	1
APOH	0.904665	0.819628	0.0850362	0.35218	0.639267	-0.287087	#N/A	#N/A	#N/A	0.797285	0.929624	-0.132339	0.904185	0.937271	-0.0330858	0.901985	0.95049	-0.0485049	0	No	No	1
APOL5	0.862767	0.869589	-0.00682193	#N/A	#N/A	#N/A	#N/A	#N/A	#N/A	#N/A	#N/A	#N/A	0.320868	0.788572	-0.467704	0.82265	0.804211	0.0184387	0	No	No	1
APOOL	0.394026	0.595073	-0.201048	0.241785	0.438332	-0.196547	#N/A	#N/A	#N/A	#N/A	#N/A	#N/A	0.124995	0.382409	-0.257414	0.523961	0.73938	-0.215419	0	No	No	3
AQP11	0.233151	0.552529	-0.319378	0.0444056	0.0538943	-0.00948877	0.0219371	0.0372603	-0.0153232	0.0873852	0.0637627	0.0236224	0.701006	0.715769	-0.0147626	0.840424	0.499725	0.340699	1	No	No	1
AQP12A	0.490081	0.775644	-0.285564	0.420469	0.716771	-0.296302	#N/A	#N/A	#N/A	0.367042	0.759088	-0.392046	0.584527	0.757653	-0.173126	#N/A	#N/A	#N/A	0	No	No	3
AQP12B	0.293724	0.707171	-0.413447	0.447888	0.808257	-0.360369	#N/A	#N/A	#N/A	0.51496	0.772969	-0.258009	0.439216	0.611788	-0.172572	#N/A	#N/A	#N/A	0	No	No	3
AQP2	0.535003	0.38881	0.146193	0.5926	0.515091	0.0775091	0.878339	0.665465	0.212874	0.867132	0.714452	0.15268	0.615892	0.583162	0.0327299	0.685995	0.758676	-0.0726811	1	No	No	0
AQP4	0.249356	0.493412	-0.244056	0.683819	0.898517	-0.214699	0.180321	0.458678	-0.278357	0.49313	0.700182	-0.207053	0.27244	0.55195	-0.27951	0.476499	0.638045	-0.161545	0	No	No	5
AQP7P1	0.603132	0.817949	-0.214817	#N/A	#N/A	#N/A	#N/A	#N/A	#N/A	#N/A	#N/A	#N/A	0.332729	0.511862	-0.179133	#N/A	#N/A	#N/A	0	No	No	1
AQP7P2	0.444459	0.767533	-0.323074	#N/A	#N/A	#N/A	#N/A	#N/A	#N/A	#N/A	#N/A	#N/A	0.332729	0.511862	-0.179133	#N/A	#N/A	#N/A	0	No	No	1
AQP9	0.586429	0.800186	-0.213758	0.687393	0.820595	-0.133202	0.432617	0.770747	-0.33813	0.432617	0.770747	-0.33813	0.0797433	0.0919107	-0.0121674	0.721996	0.926156	-0.20416	0	No	No	4
AQR	0.540349	0.721705	-0.181356	0.0327228	0.0401525	-0.0074297	0.0223458	0.0333418	-0.010996	0.0197379	0.0323139	-0.0125761	0.56919	0.563785	0.00540537	0.673918	0.926144	-0.252226	0	No	No	1
AR	0.449154	0.540093	-0.090939	0.198592	0.248579	-0.049987	0.15843	0.375013	-0.216583	0.197848	0.38328	-0.185431	0.59101	0.693884	-0.102873	0.146539	0.113374	0.0331648	0	No	No	1
ARAF	0.206519	0.419348	-0.212829	0.113274	0.305345	-0.192071	0.244045	0.471642	-0.227597	0.211249	0.536818	-0.325569	0.742644	0.884335	-0.141691	0.764994	0.76078	0.00421437	0	No	No	3
ARAP2	0.100894	0.0624762	0.0384183	#N/A	#N/A	#N/A	0.139661	0.0965765	0.0430849	0.0465099	0.0130491	0.0334608	0.626202	0.845806	-0.219604	0.688449	0.92954	-0.24109	0	No	No	2
ARC	0.0568752	0.089769	-0.0328938	0.0982231	0.0975374	0.000685761	0.0381071	0.0143234	0.0237837	0.156452	0.384632	-0.22818	#N/A	#N/A	#N/A	0.26561	0.688113	-0.422503	0	No	No	2
AREG	0.373207	0.459906	-0.0866989	#N/A	#N/A	#N/A	#N/A	#N/A	#N/A	0.031835	0.0429543	-0.0111193	0.562282	0.92763	-0.365348	#N/A	#N/A	#N/A	0	No	No	1
ARF5	0.2944	0.258341	0.0360595	0.00956623	0.0154579	-0.00589167	0.00904103	0.0214849	-0.0124439	0.00904103	0.0214849	-0.0124439	0.0667008	0.0660268	0.000674003	0.816982	0.612937	0.204045	1	No	No	0
ARGFX	0.741956	0.845132	-0.103176	#N/A	#N/A	#N/A	0.667021	0.822769	-0.155748	0.837178	0.821774	0.0154047	#N/A	#N/A	#N/A	0.61395	0.861728	-0.247778	0	No	No	1
ARHGAP15	0.607186	0.814638	-0.207452	#N/A	#N/A	#N/A	0.574242	0.873802	-0.29956	0.574242	0.873802	-0.29956	0.694109	0.809888	-0.115779	#N/A	#N/A	#N/A	0	No	No	3
ARHGAP22	0.0539478	0.0718937	-0.0179459	0.0578663	0.115497	-0.0576305	0.0222548	0.0314292	-0.00917446	0.0222548	0.0314292	-0.00917446	0.563184	0.544644	0.0185402	0.501425	0.0310716	0.470353	1	No	No	0
ARHGAP23	0.757865	0.529472	0.228393	0.903142	0.886262	0.0168799	0.825157	0.721181	0.103976	0.834444	0.792208	0.0422363	0.628654	0.630885	-0.00223053	0.673967	0.646131	0.0278365	1	No	No	0
ARHGAP26	0.0388303	0.0452966	-0.0064663	#N/A	#N/A	#N/A	0.00960316	0.0234475	-0.0138443	0.0267644	0.0374746	-0.0107102	0.694208	0.722053	-0.0278452	0.445665	0.864092	-0.418426	0	No	No	1
ARHGAP30	0.534385	0.878139	-0.343754	#N/A	#N/A	#N/A	0.353454	0.707334	-0.35388	0.353454	0.707334	-0.35388	0.185098	0.67747	-0.492372	0.228628	0.647652	-0.419024	0	No	No	5
ARHGAP6	0.309551	0.452669	-0.143118	0.124542	0.341495	-0.216952	0.346577	0.41224	-0.0656624	0.289553	0.397294	-0.10774	0.600969	0.606444	-0.00547494	0.891875	0.829382	0.0624923	0	Yes	No	1
ARHGAP8	0.712149	0.387575	0.324574	0.27178	0.0917681	0.180012	0.531405	0.608186	-0.0767802	0.0166446	0.0349369	-0.0182923	0.254188	0.419644	-0.165457	0.821815	0.984568	-0.162753	1	No	No	0
ARHGEF15	0.671017	0.618134	0.0528829	0.34479	0.26334	0.0814501	0.651825	0.394621	0.257204	#N/A	#N/A	#N/A	0.222137	0.300751	-0.0786144	0.70797	0.701302	0.0066677	1	No	No	0
ARHGEF16	0.167067	0.274435	-0.107368	0.062833	0.0546581	0.00817495	0.443956	0.6979	-0.253943	#N/A	#N/A	#N/A	0.424614	0.725098	-0.300484	0.187775	0.423871	-0.236096	0	No	No	3
ARHGEF4	0.155252	0.467018	-0.311766	0.161713	0.412842	-0.251128	0.378824	0.804765	-0.425941	0.392204	0.896825	-0.504622	0.41539	0.481961	-0.0665708	0.914562	0.864379	0.0501826	0	No	No	4
ARHGEF5	0.296775	0.412311	-0.115535	#N/A	#N/A	#N/A	0.679401	0.931497	-0.252095	#N/A	#N/A	#N/A	0.301979	0.910447	-0.608469	0.717702	0.939233	-0.22153	0	No	No	3
ARHGEF6	0.335435	0.50208	-0.166645	0.174403	0.444426	-0.270024	0.186382	0.436731	-0.25035	0.192514	0.441542	-0.249028	0.363507	0.508797	-0.145291	0.657055	0.840376	-0.18332	0	No	No	3
ARHGEF9	0.148379	0.394468	-0.246089	0.206911	0.419177	-0.212267	0.147001	0.46061	-0.313609	0.147001	0.46061	-0.313609	0.517084	0.671615	-0.154531	0.419208	0.485214	-0.0660064	0	No	No	4
ARIH1	0.0352863	0.0431622	-0.00787596	0.0127883	0.0239596	-0.0111714	0.0210555	0.0349095	-0.0138541	0.0306499	0.0456372	-0.0149873	0.635216	0.684932	-0.0497161	0.927501	0.72422	0.203281	1	Yes	No	0
ARL11	0.84595	0.843086	0.00286428	0.470498	0.20156	0.268938	0.707245	0.51184	0.195405	0.707245	0.51184	0.195405	0.89781	0.918928	-0.0211185	0.470486	0.87394	-0.403453	1	No	No	1
ARL13A	0.303467	0.366154	-0.0626866	0.619944	0.730798	-0.110854	0.610148	0.904208	-0.29406	0.610148	0.904208	-0.29406	0.507262	0.693813	-0.186552	0.549853	0.72193	-0.172077	0	No	No	2
ARL4A	0.130314	0.157329	-0.027015	0.018098	0.0280669	-0.00996887	0.109355	0.130403	-0.0210481	0.118982	0.133163	-0.0141812	#N/A	#N/A	#N/A	0.889206	0.68709	0.202116	1	No	No	0
ARL4C	0.663629	0.596234	0.0673949	#N/A	#N/A	#N/A	0.0167047	0.0281216	-0.0114169	0.245798	0.351177	-0.105379	#N/A	#N/A	#N/A	0.467373	0.745633	-0.27826	0	No	No	1
ARL6IP5	0.57796	0.78837	-0.21041	0.0181739	0.0176357	0.000538266	0.0459353	0.0755968	-0.0296614	0.0514132	0.0676294	-0.0162163	0.132444	0.136019	-0.00357525	0.630747	0.279995	0.350752	1	No	No	1
ARL8A	0.207162	0.221595	-0.0144329	0.0545355	0.0633155	-0.00877992	0.068359	0.0803596	-0.0120006	0.062138	0.0728182	-0.0106802	0.521148	0.437228	0.0839203	0.953366	0.487296	0.46607	1	No	No	0
ARMC3	0.261162	0.265912	-0.0047497	0.110616	0.0397594	0.0708571	0.167451	0.150643	0.0168078	0.0479687	0.0622767	-0.014308	0.86626	0.881288	-0.0150279	0.480896	0.842113	-0.361217	0	No	No	1
ARMC4	0.551319	0.726276	-0.174957	0.0598766	0.0670371	-0.00716049	0.138323	0.184441	-0.0461186	0.00147273	0.00957898	-0.00810625	0.433193	0.694921	-0.261729	0.4446	0.905116	-0.460516	0	Yes	No	2
ARMCX1	0.269814	0.4753	-0.205486	0.0712471	0.195669	-0.124422	0.374019	0.479655	-0.105635	0.27543	0.519524	-0.244094	0.894353	0.902948	-0.00859485	0.920286	0.933989	-0.0137033	0	No	No	2
ARMCX2	0.47141	0.599891	-0.128481	0.118067	0.314654	-0.196587	0.16563	0.392541	-0.226911	0.259648	0.50441	-0.244762	0.884317	0.896168	-0.0118505	0.718963	0.754088	-0.035125	0	No	No	2
ARMCX3	0.278307	0.42992	-0.151613	0.106168	0.354515	-0.248348	0.140758	0.399392	-0.258634	0.211981	0.415696	-0.203714	0.859812	0.908708	-0.0488966	#N/A	#N/A	#N/A	0	No	No	3
ARMCX4	0.716079	0.515564	0.200515	0.0684872	0.280704	-0.212217	#N/A	#N/A	#N/A	#N/A	#N/A	#N/A	0.536871	0.550699	-0.0138278	#N/A	#N/A	#N/A	1	No	No	1
ARMCX5	0.256077	0.599109	-0.343033	0.206462	0.404361	-0.197898	0.228989	0.384759	-0.15577	0.215652	0.405694	-0.190042	0.665922	0.654379	0.011543	0.71048	0.654295	0.0561841	0	No	No	1
ARNT	0.37082	0.581625	-0.210805	0.0522162	0.0676006	-0.0153843	0.0158251	0.0209412	-0.00511609	0.0158251	0.0209412	-0.00511609	0.489975	0.453659	0.0363157	0.594871	0.402903	0.191967	0	No	No	1
ARPP-21	0.337154	0.779567	-0.442413	0.394172	0.831539	-0.437366	0.262816	0.554626	-0.29181	0.155192	0.639948	-0.484756	0.373414	0.801305	-0.427891	0.264381	0.858304	-0.593923	0	Yes	No	6
ARR3	0.583158	0.836757	-0.253599	#N/A	#N/A	#N/A	#N/A	#N/A	#N/A	#N/A	#N/A	#N/A	0.705384	0.836132	-0.130748	0.66925	0.789177	-0.119928	0	No	No	1
ARRDC5	0.63044	0.862766	-0.232326	0.462633	0.694675	-0.232041	#N/A	#N/A	#N/A	0.868652	0.90255	-0.0338977	0.571247	0.767513	-0.196266	0.549103	0.739773	-0.19067	0	No	No	2
ARSD	0.782479	0.823056	-0.0405774	0.0612824	0.0919987	-0.0307163	0.0210155	0.0295253	-0.00850979	0.0210155	0.0295253	-0.00850979	0.802827	0.780547	0.0222806	0.613236	0.837028	-0.223791	0	No	No	1
ARSE	0.606548	0.658903	-0.0523545	#N/A	#N/A	#N/A	0.632184	0.488726	0.143458	0.687708	0.531906	0.155802	0.808568	0.904361	-0.0957932	0.472242	0.789347	-0.317105	0	No	No	1
ARSF	0.471555	0.601625	-0.13007	0.1785	0.286426	-0.107926	0.291729	0.50524	-0.213511	#N/A	#N/A	#N/A	0.55142	0.899921	-0.348501	0.364743	0.716156	-0.351413	0	No	No	3
ARSG	0.791087	0.837932	-0.0468454	0.430067	0.215981	0.214086	0.302911	0.359414	-0.0565031	0.479019	0.234803	0.244216	0.527755	0.498427	0.029328	0.811876	0.910911	-0.0990346	2	No	No	0
ARSH	0.580118	0.896154	-0.316036	0.5291	0.666812	-0.137713	#N/A	#N/A	#N/A	#N/A	#N/A	#N/A	0.617409	0.917142	-0.299733	#N/A	#N/A	#N/A	0	No	No	2
ART1	0.721471	0.840596	-0.119125	0.352941	0.374189	-0.0212477	0.565737	0.855951	-0.290214	#N/A	#N/A	#N/A	0.66632	0.787244	-0.120925	0.721198	0.728892	-0.0076943	0	No	No	1
ART3	0.787244	0.885862	-0.0986182	0.814328	0.81604	-0.00171209	0.619878	0.726939	-0.107061	0.994205	0.994688	-0.0004833	0.654459	0.452924	0.201535	0.80259	0.875403	-0.0728128	1	No	No	0
ART5	0.192311	0.216759	-0.0244479	0.0428947	0.04334	-0.000445322	0.068458	0.0610585	0.00739959	0.068458	0.0610585	0.00739959	0.540854	0.2857	0.255153	0.456414	0.629956	-0.173542	1	No	No	0
ARX	0.670702	0.426653	0.244049	0.489564	0.257012	0.232552	0.60783	0.420854	0.186976	0.580099	0.401273	0.178826	0.421909	0.417614	0.00429471	0.419925	0.585778	-0.165854	2	No	No	0
ASAH2	0.421978	0.841294	-0.419316	#N/A	#N/A	#N/A	#N/A	#N/A	#N/A	0.430124	0.926485	-0.49636	0.938925	0.946476	-0.00755103	#N/A	#N/A	#N/A	0	No	No	2
ASAM	0.671615	0.447228	0.224386	0.0325207	0.0352086	-0.00268787	#N/A	#N/A	#N/A	#N/A	#N/A	#N/A	0.535574	0.513456	0.0221176	0.897209	0.868607	0.0286028	1	No	No	0
ASB11	0.639256	0.775042	-0.135786	0.284224	0.653428	-0.369204	0.667159	0.678528	-0.0113693	0.721368	0.790448	-0.0690801	0.676333	0.752574	-0.0762409	#N/A	#N/A	#N/A	0	No	No	1
ASB12	0.366366	0.539305	-0.172939	#N/A	#N/A	#N/A	#N/A	#N/A	#N/A	0.403903	0.819988	-0.416085	0.51132	0.904448	-0.393128	0.408298	0.763113	-0.354815	0	No	No	3
ASB15	0.643798	0.921008	-0.27721	#N/A	#N/A	#N/A	0.414866	0.849935	-0.435069	0.332673	0.884127	-0.551453	0.883933	0.958264	-0.0743317	0.660349	0.860308	-0.199958	0	No	No	3
ASB18	0.49312	0.758295	-0.265176	0.128433	0.267434	-0.139001	#N/A	#N/A	#N/A	0.350366	0.5996	-0.249235	0.429859	0.609217	-0.179358	#N/A	#N/A	#N/A	0	No	No	2
ASB5	0.65854	0.86707	-0.20853	0.782489	0.929599	-0.14711	#N/A	#N/A	#N/A	0.833026	0.974508	-0.141482	0.858064	0.924763	-0.066699	0.813701	0.883293	-0.0695913	0	No	No	1
ASB9	0.584191	0.716951	-0.132759	0.29214	0.527238	-0.235099	0.196756	0.376889	-0.180133	0.196756	0.376889	-0.180133	0.704684	0.863209	-0.158525	0.806458	0.91697	-0.110512	0	No	No	1
ASCC1	0.189814	0.264303	-0.0744895	#N/A	#N/A	#N/A	0.0720983	0.0836205	-0.0115222	0.0336815	0.0511185	-0.0174371	0.797375	0.823961	-0.0265858	0.553877	0.927342	-0.373465	0	No	No	1
ASCC2	0.0729055	0.0828153	-0.00990984	0.0225876	0.026771	-0.00418335	0.210412	0.289212	-0.0787994	0.00505363	0.0131183	-0.00806469	0.36189	0.128948	0.232942	0.947404	0.944001	0.0034029	1	No	No	0
ASCL1	0.125186	0.113285	0.0119003	0.0636923	0.0302845	0.0334078	0.0456627	0.0326228	0.01304	0.0524988	0.0365543	0.0159444	#N/A	#N/A	#N/A	0.620417	0.400335	0.220082	1	Yes	No	0
ASCL2	0.468091	0.525998	-0.0579071	0.378321	0.157237	0.221084	0.146311	0.0712628	0.0750484	0.132272	0.0641402	0.0681322	#N/A	#N/A	#N/A	0.107169	0.135913	-0.0287444	1	No	No	0
ASFMR1	0.420973	0.257577	0.163396	#N/A	#N/A	#N/A	#N/A	#N/A	#N/A	#N/A	#N/A	#N/A	0.245269	0.454086	-0.208817	#N/A	#N/A	#N/A	0	No	No	1
ASGR1	0.507181	0.654698	-0.147517	0.291039	0.548074	-0.257035	0.226019	0.449355	-0.223336	0.226019	0.449355	-0.223336	0.350444	0.321585	0.0288587	0.845873	0.931935	-0.0860623	0	No	No	3
ASGR2	0.567973	0.744253	-0.176281	0.915388	0.944163	-0.0287758	0.842511	0.867646	-0.0251355	0.818218	0.84214	-0.023922	0.399085	0.679766	-0.280681	#N/A	#N/A	#N/A	0	No	No	1
ASNS	0.125566	0.136465	-0.0108996	0.0397947	0.0450513	-0.00525661	0.0916668	0.105535	-0.0138678	0.0259537	0.0366129	-0.0106592	0.867149	0.926476	-0.059327	0.541904	0.838215	-0.29631	0	No	No	1
ASPA	0.498762	0.742324	-0.243562	0.239993	0.565606	-0.325613	0.306037	0.538266	-0.232229	0.379836	0.495605	-0.115769	0.460012	0.672934	-0.212922	0.299999	0.867977	-0.567978	0	No	No	5
ASPG	0.304202	0.443857	-0.139655	0.0828133	0.0721442	0.0106691	#N/A	#N/A	#N/A	#N/A	#N/A	#N/A	0.4703	0.672297	-0.201997	#N/A	#N/A	#N/A	0	No	No	1
ASRGL1	0.467498	0.888208	-0.42071	0.267713	0.476448	-0.208735	0.010562	0.00868809	0.00187387	0.00754846	0.00777243	-0.000223974	0.681766	0.709095	-0.0273286	0.52311	0.692599	-0.169489	0	No	No	2
ASTL	0.410078	0.372975	0.0371031	0.778443	0.400798	0.377646	#N/A	#N/A	#N/A	#N/A	#N/A	#N/A	0.98782	0.982828	0.00499217	#N/A	#N/A	#N/A	1	No	No	0
ASTN1	0.0736973	0.0988859	-0.0251886	#N/A	#N/A	#N/A	0.0795454	0.0693087	0.0102368	0.0692027	0.0694945	-0.00029183	0.578968	0.731322	-0.152354	0.524067	0.766719	-0.242652	0	No	No	1
ASTN2	0.213096	0.294883	-0.0817868	0.0238151	0.028647	-0.00483183	0.055287	0.0678437	-0.0125568	0.055287	0.0678437	-0.0125568	0.321077	0.523791	-0.202713	#N/A	#N/A	#N/A	0	Yes	No	1
ASZ1	0.433763	0.904193	-0.470431	0.61923	0.849484	-0.230254	#N/A	#N/A	#N/A	0.509803	0.851438	-0.341635	0.547202	0.893643	-0.346441	#N/A	#N/A	#N/A	0	No	No	4
ATAD3C	0.621163	0.656113	-0.0349502	0.379653	0.896268	-0.516615	0.601305	0.806821	-0.205517	0.601305	0.806821	-0.205517	0.638709	0.725588	-0.0868788	0.57409	0.439173	0.134917	0	No	No	3
ATCAY	0.38665	0.704698	-0.318048	0.0647076	0.0515889	0.0131187	0.159681	0.219997	-0.0603161	0.0399049	0.0514182	-0.0115133	0.385018	0.65449	-0.269472	0.516598	0.898179	-0.381581	0	No	No	3
ATF4	0.0819159	0.105775	-0.0238593	0.0227279	0.0291133	-0.00638548	0.199415	0.199519	-0.000103238	0.199415	0.199519	-0.000103238	0.147987	0.350096	-0.202109	0.218181	0.16088	0.0573006	0	No	No	1
ATF6	0.07933	0.153283	-0.0739528	0.033953	0.0366502	-0.0026972	0.0297335	0.0252595	0.00447402	0.0379598	0.0359847	0.00197515	0.785038	0.812507	-0.0274685	0.649726	0.925304	-0.275578	0	No	No	1
ATG16L1	0.367114	0.617701	-0.250587	0.0311086	0.0393954	-0.0082868	0.0127295	0.0293969	-0.0166673	0.0127295	0.0293969	-0.0166673	0.536156	0.555422	-0.0192656	0.853249	0.698738	0.154511	0	No	No	1
ATG4A	0.28123	0.499191	-0.217961	0.33845	0.474919	-0.136469	0.116797	0.268994	-0.152197	0.116797	0.268994	-0.152197	0.315259	0.527297	-0.212038	0.765163	0.840295	-0.0751318	0	No	No	2
ATG9B	0.762858	0.817017	-0.0541587	0.607584	0.692818	-0.0852332	0.572861	0.622704	-0.049843	0.572861	0.622704	-0.049843	0.279813	0.285734	-0.00592131	0.840853	0.526582	0.314271	1	No	No	0
ATP10B	0.282835	0.861421	-0.578586	0.475843	0.933175	-0.457332	0.281609	0.780816	-0.499207	0.272977	0.822095	-0.549118	0.271501	0.788236	-0.516735	0.495095	0.757132	-0.262038	0	No	No	6
ATP11B	0.0659611	0.0503173	0.0156438	0.0041198	0.00640493	-0.00228513	0.00543819	0.0125894	-0.00715119	0.00543819	0.0125894	-0.00715119	0.455582	0.407759	0.0478237	0.922046	0.660762	0.261284	1	No	No	0
ATP11C	0.666024	0.686362	-0.0203383	0.214558	0.585158	-0.3706	#N/A	#N/A	#N/A	#N/A	#N/A	#N/A	0.519362	0.658061	-0.138699	0.649522	0.618101	0.0314206	0	No	No	1
ATP13A4	0.715089	0.869108	-0.154019	0.155154	0.238073	-0.0829195	0.496859	0.559547	-0.0626871	0.476194	0.627915	-0.151721	0.500879	0.830218	-0.329338	#N/A	#N/A	#N/A	0	No	No	1
ATP13A5	0.35874	0.874049	-0.515309	0.204852	0.70485	-0.499998	#N/A	#N/A	#N/A	0.208492	0.790267	-0.581774	0.481199	0.795595	-0.314396	#N/A	#N/A	#N/A	0	No	No	4
ATP1A2	0.597552	0.650741	-0.0531893	0.564822	0.446097	0.118725	0.396155	0.297935	0.0982199	0.396155	0.297935	0.0982199	0.762093	0.780504	-0.0184107	0.683803	0.897054	-0.213251	0	No	No	1
ATP1A3	0.188023	0.271325	-0.083302	#N/A	#N/A	#N/A	0.0788901	0.109491	-0.0306012	0.0788901	0.109491	-0.0306012	0.181102	0.18035	0.00075238	0.304721	0.565836	-0.261115	0	No	No	1
ATP1A4	0.647888	0.832521	-0.184633	0.539251	0.78522	-0.245969	0.712899	0.73148	-0.0185809	0.758757	0.779615	-0.0208577	0.73221	0.847603	-0.115393	0.391638	0.639592	-0.247954	0	No	No	2
ATP1B4	0.324535	0.702381	-0.377847	0.655983	0.837782	-0.181799	0.676054	0.802682	-0.126629	0.676054	0.802682	-0.126629	0.423507	0.5911	-0.167593	0.142119	0.531186	-0.389067	0	No	No	2
ATP2A1	0.629157	0.61335	0.0158069	0.759699	0.808111	-0.048412	0.630691	0.86643	-0.23574	0.584194	0.758981	-0.174787	0.554959	0.55286	0.00209954	0.864294	0.809565	0.0547283	0	No	No	1
ATP2B3	0.699543	0.845653	-0.14611	0.424426	0.692656	-0.26823	0.436403	0.717861	-0.281458	0.436403	0.717861	-0.281458	0.966713	0.990601	-0.0238882	0.284784	0.444688	-0.159904	0	No	No	3
ATP4A	0.429712	0.748196	-0.318484	0.306767	0.733348	-0.426582	0.524595	0.804344	-0.279748	0.335606	0.684205	-0.348599	0.215822	0.298579	-0.0827576	0.780239	0.77445	0.00578857	0	No	No	4
ATP5EP2	0.199959	0.506145	-0.306186	0.338956	0.852464	-0.513508	#N/A	#N/A	#N/A	#N/A	#N/A	#N/A	0.201659	0.255917	-0.0542573	#N/A	#N/A	#N/A	0	No	No	2
ATP5G1	0.035733	0.0459116	-0.0101786	0.0126497	0.0181629	-0.00551321	0.0492446	0.0777573	-0.0285127	0.0699852	0.143201	-0.0732162	0.876874	0.843777	0.0330972	0.326003	0.542929	-0.216926	0	No	No	1
ATP5G2	0.0642261	0.0988272	-0.0346011	0.0490437	0.0679962	-0.0189525	0.0351319	0.0447544	-0.00962252	0.0351319	0.0447544	-0.00962252	0.254851	0.235178	0.0196723	0.405846	0.631186	-0.22534	0	No	No	1
ATP6AP1	0.528561	0.637817	-0.109256	0.459249	0.477765	-0.018516	0.303872	0.55739	-0.253518	0.425407	0.553974	-0.128567	0.548356	0.641147	-0.0927906	0.65745	0.720931	-0.0634807	0	No	No	1
ATP6V0A4	0.438404	0.599993	-0.161589	0.386334	0.270923	0.115411	0.567758	0.646439	-0.078681	0.540673	0.309729	0.230944	0.704422	0.835828	-0.131406	0.875817	0.8578	0.0180166	1	No	No	0
ATP6V0D2	0.760183	0.925163	-0.16498	0.385975	0.687588	-0.301613	0.241335	0.604123	-0.362788	0.241335	0.604123	-0.362788	0.469053	0.871389	-0.402336	#N/A	#N/A	#N/A	0	No	No	4
ATP6V0E2	0.341328	0.643535	-0.302207	0.0889036	0.0819276	0.00697601	0.0626676	0.0539126	0.00875508	0.0516169	0.0406373	0.0109796	0.450967	0.534945	-0.083978	0.7699	0.912069	-0.142169	0	No	No	1
ATP6V1C1	0.163581	0.455766	-0.292185	0.0313056	0.0346777	-0.00337206	0.165437	0.184995	-0.019558	0.028349	0.0283938	-4.4811e-05	0.907465	0.948976	-0.0415103	0.943747	0.92193	0.0218173	0	No	No	1
ATP6V1E2	0.596624	0.404588	0.192037	#N/A	#N/A	#N/A	0.710555	0.769552	-0.0589973	0.664736	0.742875	-0.0781389	0.655661	0.878961	-0.2233	#N/A	#N/A	#N/A	0	No	No	1
ATP7A	#N/A	#N/A	#N/A	0.103653	0.283155	-0.179501	0.533261	0.697233	-0.163972	0.190253	0.463549	-0.273296	0.72286	0.931047	-0.208187	0.621439	0.564202	0.0572373	0	No	No	2
ATP7B	0.02201	0.0279241	-0.00591409	0.0304994	0.0414535	-0.0109541	#N/A	#N/A	#N/A	#N/A	#N/A	#N/A	0.317717	0.411627	-0.0939103	0.524304	0.875733	-0.351429	0	No	No	1
ATP8A2	0.759292	0.774021	-0.0147291	#N/A	#N/A	#N/A	0.102625	0.102318	0.000307398	0.109351	0.0999167	0.00943422	0.313976	0.606009	-0.292033	0.437833	0.731175	-0.293343	0	Yes	No	2
ATP8B3	0.0581665	0.056889	0.00127754	0.00640123	0.0158011	-0.00939991	0.0212024	0.0465378	-0.0253353	#N/A	#N/A	#N/A	0.329136	0.543821	-0.214685	0.449796	0.971503	-0.521707	0	No	No	2
ATRNL1	0.0523632	0.0557037	-0.00334044	0.0675758	0.0804117	-0.0128359	0.0216211	0.0191249	0.0024962	0.0495738	0.0432602	0.00631359	0.466815	0.582925	-0.116111	0.751553	0.954913	-0.203361	0	No	No	1
ATRX	0.377315	0.683252	-0.305937	0.166286	0.379997	-0.213711	0.315335	0.479249	-0.163914	0.315335	0.479249	-0.163914	0.320295	0.498371	-0.178076	#N/A	#N/A	#N/A	0	No	No	2
ATXN10	0.155652	0.114276	0.0413764	0.0379449	0.0218763	0.0160685	0.00296521	0.00465712	-0.00169191	0.00296521	0.00465712	-0.00169191	0.225661	0.232632	-0.00697085	0.909343	0.70258	0.206763	1	No	No	0
ATXN8OS	0.506896	0.898412	-0.391516	0.440984	0.779112	-0.338128	#N/A	#N/A	#N/A	#N/A	#N/A	#N/A	0.238921	0.339922	-0.101001	#N/A	#N/A	#N/A	0	No	No	2
AURKA	0.168611	0.166647	0.00196465	0.0329501	0.0371449	-0.00419482	0.213543	0.209112	0.00443025	0.0454734	0.0489623	-0.00348888	0.655071	0.894385	-0.239315	0.827458	0.892202	-0.0647439	0	No	No	1
AURKB	0.253328	0.554727	-0.301399	0.0163605	0.0276884	-0.0113278	0.0699407	0.0879027	-0.0179621	#N/A	#N/A	#N/A	0.372969	0.432007	-0.0590387	0.809977	0.790834	0.0191432	0	No	No	1
AURKC	0.642395	0.858282	-0.215888	0.610084	0.730002	-0.119918	0.634532	0.72359	-0.0890581	0.634532	0.72359	-0.0890581	0.748331	0.824946	-0.0766146	#N/A	#N/A	#N/A	0	No	No	1
AVEN	0.20693	0.215939	-0.00900926	0.00770713	0.011498	-0.00379083	#N/A	#N/A	#N/A	0.00782023	0.014703	-0.0068828	0.485405	0.370084	0.115321	0.883414	0.58574	0.297673	1	No	No	0
AVIL	0.61365	0.38758	0.22607	0.251267	0.152989	0.0982773	#N/A	#N/A	#N/A	0.246267	0.329536	-0.0832691	0.705874	0.675578	0.0302956	#N/A	#N/A	#N/A	1	No	No	0
AVPR1A	0.351887	0.923571	-0.571684	#N/A	#N/A	#N/A	0.0937096	0.0962509	-0.00254138	0.21757	0.110873	0.106696	0.670059	0.663139	0.0069195	0.245904	0.645829	-0.399925	0	Yes	No	2
AVPR2	0.366071	0.565724	-0.199653	0.352264	0.598398	-0.246134	0.494198	0.70231	-0.208113	0.494198	0.70231	-0.208113	0.441947	0.668341	-0.226395	0.492439	0.821347	-0.328908	0	No	No	5
AWAT1	#N/A	#N/A	#N/A	0.236474	0.582856	-0.346382	#N/A	#N/A	#N/A	#N/A	#N/A	#N/A	0.6545	0.892375	-0.237875	#N/A	#N/A	#N/A	0	No	No	2
AWAT2	0.59056	0.807747	-0.217187	0.325746	0.581088	-0.255342	#N/A	#N/A	#N/A	#N/A	#N/A	#N/A	0.47914	0.675903	-0.196763	0.3274	0.581821	-0.254421	0	No	No	3
AZGP1	0.4068	0.859139	-0.452339	0.226665	0.59099	-0.364325	#N/A	#N/A	#N/A	#N/A	#N/A	#N/A	0.366584	0.72375	-0.357166	0.352828	0.838226	-0.485398	0	No	No	4
AZU1	0.653225	0.73732	-0.0840948	0.521467	0.68224	-0.160774	0.65423	0.821956	-0.167726	0.65423	0.821956	-0.167726	0.52248	0.732275	-0.209795	#N/A	#N/A	#N/A	0	No	No	1
B3GALNT2	0.0539841	0.060029	-0.00604488	0.011499	0.013297	-0.00179803	0.00913661	0.0109662	-0.00182961	0.0184691	0.0234511	-0.00498201	0.540292	0.507904	0.0323883	0.878911	0.609965	0.268946	1	No	No	0
B3GALT5	0.580105	0.831316	-0.251211	#N/A	#N/A	#N/A	0.599054	0.632185	-0.0331303	0.870547	0.901716	-0.0311691	0.0857777	0.190639	-0.104861	0.910303	0.903221	0.0070813	0	No	No	1
B3GAT1	0.0905101	0.0657965	0.0247136	#N/A	#N/A	#N/A	0.347263	0.630226	-0.282963	0.170346	0.0133473	0.156999	0.522107	0.788019	-0.265911	0.33967	0.702295	-0.362625	0	No	No	3
B3GNT3	0.138714	0.334952	-0.196238	0.038656	0.10113	-0.0624738	0.458818	0.64171	-0.182891	#N/A	#N/A	#N/A	0.466718	0.715954	-0.249235	0.176199	0.635096	-0.458897	0	No	No	2
B3GNT4	0.181853	0.116138	0.0657149	0.0881371	0.111342	-0.0232047	0.0944665	0.0707653	0.0237012	0.103302	0.109259	-0.0059565	0.202427	0.530884	-0.328457	0.931643	0.897359	0.0342841	0	No	No	1
B3GNT6	0.853981	0.901597	-0.0476163	0.295647	0.550927	-0.25528	0.553153	0.763213	-0.210059	#N/A	#N/A	#N/A	0.529901	0.424681	0.10522	0.911676	0.913072	-0.001396	0	No	No	2
B3GNT7	0.790508	0.708161	0.0823474	0.540749	0.279711	0.261038	#N/A	#N/A	#N/A	#N/A	#N/A	#N/A	0.529296	0.555371	-0.0260744	0.446439	0.435377	0.011062	1	No	No	0
B3GNT9	0.106501	0.14767	-0.0411696	0.0442466	0.0496	-0.00535342	0.0576469	0.0703384	-0.0126916	#N/A	#N/A	#N/A	0.869409	0.596022	0.273387	0.456762	0.488863	-0.0321006	1	No	No	0
B4GALNT2	0.258953	0.517239	-0.258286	0.122979	0.154998	-0.0320185	0.108746	0.12679	-0.0180447	0.0655818	0.0789503	-0.0133684	0.170183	0.251501	-0.0813182	#N/A	#N/A	#N/A	0	No	No	1
B4GALT4	0.0893293	0.210519	-0.12119	0.0223944	0.027901	-0.00550657	0.27515	0.293598	-0.0184485	#N/A	#N/A	#N/A	0.907117	0.871083	0.0360345	0.593922	0.807712	-0.21379	0	No	No	1
B4GALT5	0.231102	0.214672	0.0164297	0.0528382	0.0779631	-0.0251249	#N/A	#N/A	#N/A	0.00738878	0.0177666	-0.0103778	0.437463	0.191763	0.2457	0.820431	0.706043	0.114388	1	Yes	No	0
B4GALT6	0.442235	0.358283	0.0839519	#N/A	#N/A	#N/A	0.059825	0.0784019	-0.0185769	0.059825	0.0784019	-0.0185769	0.52644	0.596582	-0.070142	0.765768	0.316997	0.448771	1	No	No	0
BAALC	0.693631	0.757568	-0.0639365	0.0466304	0.114961	-0.068331	#N/A	#N/A	#N/A	0.0327326	0.045814	-0.0130814	0.694739	0.651202	0.0435372	0.535889	0.830603	-0.294714	0	No	No	1
BACH2	0.50191	0.4521	0.0498104	0.00374891	0.00357224	0.000176674	0.370856	0.430438	-0.0595824	0.00332289	0.00581594	-0.00249305	0.650759	0.727891	-0.0771318	0.501497	0.753505	-0.252008	0	Yes	No	1
BAGE	0.334549	0.656969	-0.32242	0.718349	0.881956	-0.163607	0.502664	0.828168	-0.325504	0.502664	0.828168	-0.325504	0.289688	0.758425	-0.468737	0.1538	0.542928	-0.389127	0	No	No	5
BAGE2	0.334549	0.656969	-0.32242	0.718349	0.881956	-0.163607	0.502664	0.828168	-0.325504	0.502664	0.828168	-0.325504	0.221744	0.650676	-0.428932	0.335433	0.580337	-0.244904	0	No	No	5
BAGE3	0.334549	0.656969	-0.32242	0.718349	0.881956	-0.163607	0.502664	0.828168	-0.325504	0.502664	0.828168	-0.325504	0.221744	0.650676	-0.428932	0.335433	0.580337	-0.244904	0	No	No	5
BAGE4	0.334549	0.656969	-0.32242	0.718349	0.881956	-0.163607	0.502664	0.828168	-0.325504	0.502664	0.828168	-0.325504	0.289688	0.758425	-0.468737	0.244617	0.561632	-0.317016	0	No	No	5
BAGE5	0.334549	0.656969	-0.32242	0.718349	0.881956	-0.163607	0.502664	0.828168	-0.325504	0.502664	0.828168	-0.325504	0.289688	0.758425	-0.468737	0.244617	0.561632	-0.317016	0	No	No	5
BAHCC1	0.131907	0.406648	-0.274741	0.00514736	0.0120173	-0.00686994	#N/A	#N/A	#N/A	0.029997	0.0424405	-0.0124435	0.685425	0.685419	6.83827e-06	0.782179	0.860396	-0.0782171	0	No	No	1
BAI1	0.370519	0.708774	-0.338255	0.203258	0.476397	-0.27314	0.21779	0.317774	-0.0999838	0.281859	0.350207	-0.0683486	0.320922	0.617906	-0.296983	0.330197	0.741121	-0.410924	0	No	No	4
BAIAP3	0.0614573	0.0630314	-0.00157401	0.102723	0.0981323	0.00459058	#N/A	#N/A	#N/A	0.0548888	0.131303	-0.0764138	0.373982	0.597993	-0.224011	0.80274	0.766024	0.0367155	0	Yes	No	1
BAK1	0.755529	0.587844	0.167685	0.34297	0.0965372	0.246433	0.231844	0.0897428	0.142101	0.231844	0.0897428	0.142101	0.787138	0.746771	0.0403673	0.839036	0.830196	0.00884007	1	No	No	0
BARHL2	0.0823167	0.0675562	0.0147605	0.382264	0.240521	0.141743	0.323603	0.105245	0.218358	0.21838	0.128744	0.0896356	0.161587	0.135982	0.0256052	#N/A	#N/A	#N/A	1	Yes	No	0
BARX1	0.860267	0.741624	0.118644	#N/A	#N/A	#N/A	#N/A	#N/A	#N/A	0.0825894	0.0873042	-0.00471477	0.508136	0.285093	0.223042	0.320136	0.186621	0.133515	1	Yes	No	0
BARX2	0.0471863	0.0564861	-0.00929981	0.075804	0.0690945	0.00670948	0.00835619	0.0200772	-0.011721	0.045592	0.0627056	-0.0171136	0.324453	0.734892	-0.410439	0.166233	0.517251	-0.351018	0	Yes	No	2
BASE	0.127785	0.538635	-0.410851	0.16889	0.745438	-0.576548	#N/A	#N/A	#N/A	#N/A	#N/A	#N/A	0.0627869	0.484919	-0.422132	#N/A	#N/A	#N/A	0	No	No	3
BATF	0.645962	0.764363	-0.118401	0.393387	0.663492	-0.270105	0.509556	0.821472	-0.311916	0.509556	0.821472	-0.311916	0.609387	0.634774	-0.0253866	0.79297	0.810901	-0.0179311	0	No	No	3
BATF2	0.603301	0.89104	-0.287738	0.0648281	0.0661301	-0.00130201	0.207485	0.203786	0.00369867	0.207485	0.203786	0.00369867	0.230626	0.202131	0.0284947	0.467803	0.763512	-0.295709	0	No	No	2
BAZ2A	0.0449571	0.0480546	-0.00309753	#N/A	#N/A	#N/A	0.043784	0.0424124	0.00137157	0.043784	0.0424124	0.00137157	0.360807	0.328642	0.0321652	0.735325	0.481634	0.253691	1	No	No	0
BBC3	0.0510668	0.0980689	-0.0470022	#N/A	#N/A	#N/A	0.0510352	0.156388	-0.105353	0.0597813	0.24281	-0.183029	0.151654	0.146269	0.00538444	0.658905	0.439679	0.219226	1	No	No	0
BCAT1	0.539026	0.772775	-0.233749	0.287657	0.55279	-0.265133	0.0268121	0.0714873	-0.0446752	0.0268121	0.0714873	-0.0446752	0.62615	0.591532	0.0346177	0.940966	0.942369	-0.0014033	0	No	No	2
BCDIN3D	0.530177	0.814638	-0.284461	0.05398	0.0580749	-0.00409495	#N/A	#N/A	#N/A	0.0171379	0.0320314	-0.0148934	0.490895	0.498925	-0.00803006	0.904953	0.945149	-0.0401954	0	No	No	1
BCL11B	0.04878	0.0298465	0.0189335	0.083548	0.156536	-0.0729878	0.0294598	0.0539657	-0.0245058	0.0491507	0.0720282	-0.0228775	0.408507	0.483709	-0.0752023	0.570935	0.849988	-0.279053	0	No	No	1
BCL2A1	0.833265	0.884905	-0.0516399	#N/A	#N/A	#N/A	#N/A	#N/A	#N/A	0.212317	0.828455	-0.616137	0.790446	0.856751	-0.0663056	#N/A	#N/A	#N/A	0	No	No	1
BCL2L1	0.0533252	0.0604696	-0.00714439	0.0241967	0.0406716	-0.0164749	0.113394	0.0525836	0.0608105	0.0311686	0.0429523	-0.0117837	0.733796	0.519119	0.214677	0.484346	0.365978	0.118368	1	No	No	0
BCL6B	0.339493	0.290347	0.049146	0.392977	0.0871497	0.305827	0.416416	0.1539	0.262516	0.341171	0.101673	0.239498	0.691996	0.648754	0.0432422	0.445389	0.580661	-0.135272	3	No	No	0
BCL8	#N/A	#N/A	#N/A	#N/A	#N/A	#N/A	#N/A	#N/A	#N/A	#N/A	#N/A	#N/A	0.514474	0.889054	-0.37458	#N/A	#N/A	#N/A	0	No	No	1
BDH1	0.208081	0.296778	-0.0886975	0.0055541	0.00798738	-0.00243329	0.27647	0.390361	-0.113891	0.500044	0.789067	-0.289023	0.865456	0.845258	0.0201978	0.224432	0.271434	-0.0470013	0	No	No	1
BDKRB1	0.37651	0.736644	-0.360134	0.166638	0.233159	-0.0665213	0.561379	0.652032	-0.0906535	#N/A	#N/A	#N/A	0.880885	0.799413	0.0814717	#N/A	#N/A	#N/A	0	No	No	1
BEND2	0.396559	0.850513	-0.453955	0.625555	0.91451	-0.288954	0.553063	0.929542	-0.37648	0.553063	0.929542	-0.37648	0.695569	0.907872	-0.212304	#N/A	#N/A	#N/A	0	No	No	5
BEND4	0.420024	0.47859	-0.058566	0.359286	0.179191	0.180095	0.158067	0.109269	0.048798	0.210977	0.13055	0.0804271	0.240382	0.355248	-0.114866	0.62865	0.865031	-0.236382	0	No	No	1
BEND6	0.11521	0.136725	-0.0215155	0.0404324	0.0507594	-0.010327	0.208295	0.191711	0.0165841	0.0192466	0.0251702	-0.00592355	0.424198	0.635822	-0.211623	0.107032	0.296316	-0.189283	0	No	No	1
BEND7	0.538183	0.804821	-0.266638	0.627826	0.898724	-0.270898	0.661798	0.804594	-0.142796	#N/A	#N/A	#N/A	0.559041	0.673034	-0.113992	0.84437	0.849235	-0.00486558	0	No	No	2
BEST1	0.32812	0.382644	-0.0545237	0.355087	0.267157	0.08793	0.722449	0.741511	-0.019062	0.653903	0.678403	-0.0245	0.4945	0.42553	0.0689704	0.803028	0.587021	0.216008	1	No	No	0
BEST2	0.23576	0.420108	-0.184348	0.510244	0.754552	-0.244308	#N/A	#N/A	#N/A	0.186772	0.690129	-0.503357	0.23736	0.310989	-0.0736293	0.185332	0.230929	-0.0455975	0	No	No	2
BEST3	0.832714	0.918009	-0.0852949	0.112016	0.472665	-0.360648	0.395756	0.610123	-0.214367	0.417436	0.686536	-0.2691	0.290385	0.576267	-0.285883	0.366436	0.772323	-0.405887	0	No	No	5
BET3L	0.33658	0.609315	-0.272735	0.3979	0.400121	-0.00222113	#N/A	#N/A	#N/A	0.731583	0.745902	-0.0143193	0.442534	0.563253	-0.120719	0.896404	0.899461	-0.0030569	0	No	No	1
BEX1	0.304089	0.627003	-0.322914	0.391661	0.408654	-0.0169923	0.337991	0.5011	-0.163109	0.31892	0.56434	-0.24542	0.898912	0.925811	-0.0268997	0.228637	0.879071	-0.650434	0	No	No	3
BEX2	0.389898	0.587203	-0.197305	0.188768	0.310046	-0.121278	0.161827	0.342716	-0.18089	0.161827	0.342716	-0.18089	0.731808	0.732253	-0.000445167	0.559217	0.846185	-0.286968	0	No	No	1
BEX4	0.452807	0.732038	-0.279231	0.227951	0.386864	-0.158913	0.3252	0.509846	-0.184646	0.258094	0.523882	-0.265788	0.701213	0.791963	-0.0907504	#N/A	#N/A	#N/A	0	No	No	2
BEX5	0.117362	0.277664	-0.160302	0.191984	0.427576	-0.235592	0.236278	0.494941	-0.258663	0.244119	0.480165	-0.236047	0.241124	0.671967	-0.430843	#N/A	#N/A	#N/A	0	No	No	4
BEYLA	0.2491	0.490688	-0.241588	#N/A	#N/A	#N/A	#N/A	#N/A	#N/A	#N/A	#N/A	#N/A	0.140974	0.593851	-0.452877	#N/A	#N/A	#N/A	0	No	No	2
BGLAP	0.336832	0.63243	-0.295598	0.505503	0.707724	-0.202222	0.809587	0.769422	0.0401647	0.809587	0.769422	0.0401647	0.853209	0.73544	0.117769	#N/A	#N/A	#N/A	0	No	No	2
BGN	0.304118	0.516119	-0.212002	0.217637	0.492827	-0.27519	0.189698	0.562588	-0.37289	0.196734	0.61486	-0.418126	0.703229	0.788816	-0.0855877	0.905545	0.918095	-0.0125498	0	No	No	4
BHMT	0.76852	0.898176	-0.129656	0.792642	0.455113	0.337529	0.778192	0.221416	0.556775	0.778192	0.221416	0.556775	0.569621	0.172988	0.396633	0.60199	0.739412	-0.137422	4	No	No	0
BICD1	0.16675	0.231569	-0.0648198	0.0339521	0.0464218	-0.0124698	#N/A	#N/A	#N/A	0.0648484	0.0651439	-0.000295545	0.715614	0.78626	-0.0706459	0.489658	0.848573	-0.358916	0	No	No	1
BIRC7	0.44773	0.477247	-0.0295172	0.453909	0.49493	-0.0410213	0.343776	0.547264	-0.203488	0.607331	0.702817	-0.0954859	0.857546	0.87144	-0.0138938	0.756886	0.664462	0.0924238	0	No	No	1
BIRC8	#N/A	#N/A	#N/A	0.601808	0.922925	-0.321118	0.349917	0.879763	-0.529846	0.354965	0.874195	-0.519231	#N/A	#N/A	#N/A	#N/A	#N/A	#N/A	0	No	No	3
BIVM	0.154964	0.196368	-0.0414038	0.0286485	0.0378312	-0.0091827	0.164469	0.166881	-0.00241203	0.059216	0.0638066	-0.0045906	0.565897	0.287939	0.277958	0.901493	0.902055	-0.000562567	1	No	No	0
BLK	0.329338	0.742278	-0.41294	0.358039	0.839964	-0.481924	0.335342	0.813762	-0.478421	0.374863	0.819462	-0.444599	0.277899	0.53595	-0.258051	0.143405	0.142939	0.000466567	0	No	No	5
BLM	0.032006	0.0354084	-0.00340242	0.0313893	0.0426679	-0.0112786	0.223896	0.239117	-0.0152205	0.0522144	0.0642264	-0.012012	0.822156	0.742529	0.0796267	0.369198	0.827228	-0.45803	0	No	No	1
BLNK	0.464748	0.807897	-0.343149	0.0670355	0.1095	-0.0424641	0.191863	0.461826	-0.269963	0.311485	0.591852	-0.280367	0.445273	0.59239	-0.147117	#N/A	#N/A	#N/A	0	No	No	3
BMP15	0.487021	0.766273	-0.279252	0.291555	0.483426	-0.191871	#N/A	#N/A	#N/A	0.466635	0.768824	-0.302189	0.745988	0.929406	-0.183419	0.451842	0.769799	-0.317957	0	No	No	3
BMP4	0.441455	0.319255	0.1222	0.0615508	0.0744272	-0.0128764	0.119943	0.0636857	0.0562577	0.421107	0.0713547	0.349752	0.863219	0.705515	0.157704	#N/A	#N/A	#N/A	1	Yes	No	0
BMP5	#N/A	#N/A	#N/A	#N/A	#N/A	#N/A	0.635315	0.902702	-0.267387	0.635315	0.902702	-0.267387	0.377982	0.646102	-0.26812	#N/A	#N/A	#N/A	0	No	No	3
BMP7	0.23696	0.2793	-0.0423394	0.0983288	0.0775737	0.0207551	0.0789372	0.0805615	-0.00162431	0.095912	0.0756962	0.0202158	0.517059	0.521109	-0.00405059	0.486351	0.692602	-0.206251	0	Yes	No	1
BMP8B	0.310628	0.242165	0.0684627	0.0110887	0.0149433	-0.00385457	0.0440944	0.0438905	0.000203878	0.0440944	0.0438905	0.000203878	0.669916	0.679428	-0.00951201	0.790749	0.579884	0.210865	1	Yes	No	0
BMX	0.435558	0.783765	-0.348208	0.538272	0.677253	-0.138982	0.619177	0.760062	-0.140885	0.534849	0.769256	-0.234407	0.436438	0.865522	-0.429084	#N/A	#N/A	#N/A	0	No	No	3
BNC1	0.436363	0.366778	0.0695855	#N/A	#N/A	#N/A	#N/A	#N/A	#N/A	#N/A	#N/A	#N/A	0.186469	0.233952	-0.0474833	0.198298	0.617062	-0.418764	0	Yes	No	1
BOLL	0.261182	0.239378	0.0218041	0.484094	0.517017	-0.0329234	0.648607	0.680268	-0.0316604	0.562289	0.558596	0.00369303	0.793558	0.895213	-0.101655	0.517968	0.920386	-0.402418	0	No	No	1
BPESC1	0.56067	0.888883	-0.328213	#N/A	#N/A	#N/A	#N/A	#N/A	#N/A	#N/A	#N/A	#N/A	0.495006	0.611024	-0.116018	#N/A	#N/A	#N/A	0	No	No	1
BPI	0.362303	0.366518	-0.0042151	0.522416	0.776346	-0.25393	0.089642	0.320555	-0.230913	0.089642	0.320555	-0.230913	0.755097	0.791507	-0.0364095	0.422564	0.725112	-0.302548	0	No	No	4
BPIL1	0.470006	0.8565	-0.386494	0.574763	0.777933	-0.20317	0.407372	0.763327	-0.355955	0.356191	0.716156	-0.359966	0.324338	0.606869	-0.282531	0.213581	0.485829	-0.272248	0	No	No	6
BPIL2	0.360471	0.791816	-0.431345	#N/A	#N/A	#N/A	#N/A	#N/A	#N/A	#N/A	#N/A	#N/A	0.182006	0.635863	-0.453856	0.410635	0.566775	-0.15614	0	No	No	2
BPIL3	0.301457	0.786589	-0.485132	0.431507	0.813787	-0.382281	#N/A	#N/A	#N/A	0.5112	0.829452	-0.318252	0.204758	0.768143	-0.563386	#N/A	#N/A	#N/A	0	No	No	4
BRCC3	0.249504	0.489803	-0.240299	0.0237346	0.111245	-0.0875104	0.295224	0.510236	-0.215012	0.252849	0.47437	-0.221522	0.525667	0.648652	-0.122984	#N/A	#N/A	#N/A	0	No	No	3
BRF2	0.298234	0.644354	-0.34612	0.0760142	0.0884758	-0.0124616	0.0241492	0.0459311	-0.0217819	0.0227079	0.0350897	-0.0123818	0.622392	0.650585	-0.0281928	0.702712	0.648145	0.0545664	0	No	No	1
BRPF1	0.20416	0.273281	-0.0691207	0.038289	0.0395675	-0.00127846	0.167277	0.14094	0.0263368	0.0549633	0.0783183	-0.0233549	0.904288	0.859725	0.0445624	0.253556	0.503688	-0.250133	0	No	No	1
BRS3	0.424186	0.612025	-0.187839	#N/A	#N/A	#N/A	0.343996	0.712528	-0.368532	0.495389	0.801585	-0.306197	0.154522	0.344216	-0.189694	0.420483	0.553605	-0.133121	0	No	No	2
BRSK2	0.155827	0.164683	-0.00885657	0.0950102	0.0616821	0.0333281	#N/A	#N/A	#N/A	#N/A	#N/A	#N/A	0.355514	0.612967	-0.257453	0.445704	0.534554	-0.0888496	0	No	No	1
BRUNOL5	0.128073	0.333455	-0.205382	#N/A	#N/A	#N/A	#N/A	#N/A	#N/A	0.0103432	0.0264629	-0.0161197	0.246757	0.32792	-0.0811635	0.434542	0.757882	-0.32334	0	No	No	2
BRWD3	0.0969972	0.314585	-0.217588	#N/A	#N/A	#N/A	0.335234	0.509693	-0.174459	0.335234	0.509693	-0.174459	0.482989	0.599192	-0.116203	#N/A	#N/A	#N/A	0	No	No	1
BSND	0.777377	0.881786	-0.104409	0.241642	0.283844	-0.0422024	0.71976	0.740681	-0.0209209	0.738009	0.789719	-0.0517098	0.635238	0.720946	-0.0857084	0.534345	0.865136	-0.330791	0	No	No	1
BSPH1	0.480338	0.569505	-0.089167	#N/A	#N/A	#N/A	#N/A	#N/A	#N/A	0.487511	0.890884	-0.403374	0.889111	0.916174	-0.0270623	0.476006	0.930374	-0.454368	0	No	No	2
BSPRY	0.664722	0.659895	0.00482708	0.19629	0.152657	0.0436325	#N/A	#N/A	#N/A	#N/A	#N/A	#N/A	0.398211	0.645782	-0.247571	0.718651	0.59463	0.124021	0	No	No	1
BTAF1	0.323383	0.553834	-0.230451	0.0110696	0.0189242	-0.00785463	0.0358657	0.0598468	-0.0239812	0.0358657	0.0598468	-0.0239812	0.602946	0.619903	-0.0169579	0.920751	0.954184	-0.0334331	0	No	No	1
BTBD19	0.0471811	0.0650755	-0.0178944	0.0690821	0.127072	-0.0579897	#N/A	#N/A	#N/A	0.177494	0.160058	0.0174357	0.531072	0.458762	0.072309	0.600819	0.261321	0.339498	1	No	No	0
BTBD3	0.668812	0.735353	-0.0665406	0.183789	0.0595404	0.124248	0.401729	0.266912	0.134817	0.270252	0.1811	0.0891516	0.607303	0.147769	0.459534	0.944595	0.929283	0.0153111	1	Yes	No	0
BTC	0.371627	0.583212	-0.211585	0.102671	0.170185	-0.0675142	0.0580516	0.0623474	-0.0042958	0.0580516	0.0623474	-0.0042958	0.199389	0.245474	-0.0460851	0.403654	0.803617	-0.399964	0	Yes	No	2
BTG1	0.0415879	0.0625991	-0.0210112	#N/A	#N/A	#N/A	0.0605607	0.0647489	-0.00418823	0.0660503	0.0683089	-0.00225857	0.0322723	0.0303574	0.00191493	0.339128	0.102376	0.236752	1	No	No	0
BTG2	0.42989	0.508294	-0.078404	0.0936342	0.10427	-0.0106362	0.00163844	0.00368852	-0.00205009	0.00163844	0.00368852	-0.00205009	0.203054	0.102232	0.100823	0.630279	0.389375	0.240904	1	Yes	No	0
BTK	0.235059	0.527081	-0.292022	0.246067	0.380128	-0.134061	0.402696	0.559588	-0.156892	#N/A	#N/A	#N/A	0.388827	0.685251	-0.296424	0.524854	0.677929	-0.153075	0	No	No	2
BTLA	0.481309	0.837481	-0.356172	0.644262	0.911146	-0.266884	#N/A	#N/A	#N/A	#N/A	#N/A	#N/A	0.490715	0.946416	-0.455701	0.603488	0.928528	-0.32504	0	No	No	4
BTN1A1	0.904181	0.913944	-0.00976332	0.926125	0.935219	-0.00909407	#N/A	#N/A	#N/A	#N/A	#N/A	#N/A	0.494752	0.27083	0.223922	0.711567	0.891563	-0.179997	1	Yes	No	0
BTNL2	0.26509	0.664958	-0.399868	0.284085	0.730341	-0.446256	#N/A	#N/A	#N/A	#N/A	#N/A	#N/A	0.402856	0.772253	-0.369397	#N/A	#N/A	#N/A	0	No	No	3
BTNL3	0.301366	0.901041	-0.599675	#N/A	#N/A	#N/A	0.384884	0.738737	-0.353853	0.384884	0.738737	-0.353853	0.332633	0.775879	-0.443245	0.219266	0.846038	-0.626772	0	No	No	5
BTNL8	0.326891	0.827508	-0.500617	0.419549	0.747531	-0.327982	0.419693	0.857649	-0.437955	0.504381	0.883908	-0.379526	0.249671	0.742218	-0.492547	0.413712	0.795552	-0.38184	0	No	No	6
BTNL9	0.450013	0.735124	-0.285112	0.0840248	0.409328	-0.325303	0.234458	0.569513	-0.335055	0.0780241	0.415337	-0.337313	0.16055	0.263843	-0.103293	0.374679	0.472463	-0.0977847	0	No	No	4
BYSL	0.0947682	0.314554	-0.219786	0.0354226	0.0496626	-0.01424	0.0390949	0.0420352	-0.00294032	0.0453535	0.0503978	-0.00504428	0.281712	0.288954	-0.00724236	0.398217	0.51366	-0.115443	0	No	No	1
BZRAP1	0.68747	0.679706	0.0077635	0.404776	0.12821	0.276565	0.536059	0.275461	0.260599	0.564288	0.359266	0.205022	0.30306	0.300449	0.00261023	0.741805	0.783849	-0.0420445	3	Yes	No	0
BZW1L1	0.837274	0.800483	0.0367907	0.864595	0.662844	0.201751	#N/A	#N/A	#N/A	#N/A	#N/A	#N/A	#N/A	#N/A	#N/A	#N/A	#N/A	#N/A	1	No	No	0
C10orf104	0.0720983	0.0836205	-0.0115222	#N/A	#N/A	#N/A	0.230782	0.272499	-0.0417168	#N/A	#N/A	#N/A	0.679671	0.441326	0.238345	0.915577	0.935625	-0.0200489	1	No	No	0
C10orf111	0.0203049	0.0211094	-0.00080455	0.022815	0.0343854	-0.0115703	0.052603	0.0742274	-0.0216244	0.0929913	0.145051	-0.0520592	0.0917692	0.182912	-0.0911429	0.529425	0.902797	-0.373373	0	No	No	1
C10orf113	0.643199	0.924138	-0.280938	0.220216	0.787514	-0.567298	#N/A	#N/A	#N/A	#N/A	#N/A	#N/A	0.899021	0.886115	0.0129053	#N/A	#N/A	#N/A	0	No	No	2
C10orf116	0.773498	0.474009	0.299489	0.631709	0.105793	0.525917	0.571948	0.0568174	0.51513	0.627788	0.0886149	0.539173	0.632794	0.18701	0.445783	0.33033	0.115298	0.215032	6	No	No	0
C10orf119	0.121797	0.156545	-0.034748	0.0100928	0.00418187	0.00591097	0.0105942	0.0141607	-0.00356654	0.0105942	0.0141607	-0.00356654	0.390592	0.369327	0.0212651	0.858739	0.546045	0.312694	1	Yes	No	0
C10orf120	0.353658	0.731194	-0.377536	0.418436	0.831413	-0.412977	0.465456	0.889805	-0.424349	0.465456	0.889805	-0.424349	0.416147	0.911341	-0.495194	#N/A	#N/A	#N/A	0	No	No	5
C10orf128	0.623234	0.700279	-0.077045	0.286608	0.365465	-0.0788569	#N/A	#N/A	#N/A	#N/A	#N/A	#N/A	0.659177	0.806501	-0.147323	0.352101	0.718352	-0.366251	0	No	No	1
C10orf140	0.0515072	0.0608137	-0.00930655	0.0446633	0.0519569	-0.00729353	0.173421	0.278267	-0.104846	0.0483825	0.0405122	0.00787028	0.147839	0.197999	-0.0501602	0.595332	0.814114	-0.218782	0	No	No	1
C10orf25	0.238708	0.258556	-0.0198484	0.00470523	0.00418763	0.000517599	0.0308091	0.0381615	-0.00735239	0.163235	0.106154	0.0570809	0.833053	0.592078	0.240975	0.746066	0.7139	0.0321659	1	No	No	0
C10orf28	0.2097	0.581701	-0.372002	0.0426477	0.0548218	-0.0121741	0.385754	0.386857	-0.00110312	0.00261249	0.00224049	0.000371998	0.800229	0.82639	-0.0261606	0.66699	0.946866	-0.279876	0	No	No	2
C10orf32	0.828974	0.809487	0.0194874	0.533714	0.49738	0.0363342	0.00474869	0.00318196	0.00156673	0.0264688	0.0250069	0.00146192	0.258089	0.265412	-0.00732338	0.802603	0.523539	0.279063	1	No	No	0
C10orf40	0.71464	0.91514	-0.2005	#N/A	#N/A	#N/A	#N/A	#N/A	#N/A	#N/A	#N/A	#N/A	0.854086	0.891453	-0.0373671	#N/A	#N/A	#N/A	0	No	No	1
C10orf47	0.303146	0.3084	-0.00525469	0.12326	0.103052	0.0202078	0.449536	0.506729	-0.0571922	#N/A	#N/A	#N/A	0.609418	0.708378	-0.0989594	0.321155	0.530929	-0.209775	0	No	No	1
C10orf50	0.341456	0.847658	-0.506202	0.540417	0.883443	-0.343026	#N/A	#N/A	#N/A	#N/A	#N/A	#N/A	0.178714	0.534384	-0.35567	#N/A	#N/A	#N/A	0	No	No	3
C10orf53	0.304259	0.25847	0.0457889	0.0994564	0.0544046	0.0450518	0.135511	0.0631804	0.072331	0.135511	0.0631804	0.072331	0.219473	0.503853	-0.28438	0.174022	0.810504	-0.636482	0	No	No	2
C10orf67	0.710967	0.933349	-0.222383	#N/A	#N/A	#N/A	0.130998	0.188833	-0.0578347	0.0808784	0.105551	-0.0246728	0.186637	0.0876163	0.0990205	#N/A	#N/A	#N/A	0	No	No	1
C10orf71	0.482935	0.544769	-0.0618345	0.289262	0.34341	-0.0541482	0.486573	0.715384	-0.228811	0.478703	0.508837	-0.0301338	0.528966	0.897661	-0.368695	0.282998	0.720554	-0.437556	0	No	No	3
C10orf81	0.573433	0.858616	-0.285183	0.703238	0.873308	-0.17007	0.652948	0.918995	-0.266048	#N/A	#N/A	#N/A	0.48707	0.561303	-0.0742328	0.584672	0.595792	-0.0111197	0	No	No	2
C10orf82	0.438524	0.342404	0.09612	0.592831	0.299723	0.293109	0.746773	0.714732	0.0320405	0.877186	0.557146	0.320041	0.653908	0.655578	-0.00166933	#N/A	#N/A	#N/A	2	No	No	0
C10orf84	0.240451	0.510632	-0.270181	0.0454444	0.0567147	-0.0112703	0.159512	0.15488	0.00463243	0.030484	0.0277293	0.00275474	0.939823	0.391435	0.548388	0.893476	0.727761	0.165715	1	No	No	1
C10orf88	0.318418	0.557215	-0.238797	0.03162	0.0696678	-0.0380477	0.0414456	0.0428967	-0.00145109	0.0414456	0.0428967	-0.00145109	0.188014	0.317157	-0.129142	0.678921	0.69254	-0.0136191	0	No	No	1
C10orf90	0.207014	0.697697	-0.490683	0.258484	0.750175	-0.491692	0.481325	0.84324	-0.361916	0.481325	0.84324	-0.361916	0.419192	0.659537	-0.240345	0.551724	0.87203	-0.320305	0	No	No	6
C10orf93	0.095262	0.147227	-0.051965	0.14588	0.112232	0.0336478	#N/A	#N/A	#N/A	#N/A	#N/A	#N/A	0.349328	0.683635	-0.334307	0.821137	0.906972	-0.0858352	0	No	No	1
C10orf96	0.750415	0.687032	0.0633829	0.790519	0.898952	-0.108433	0.644046	0.73347	-0.0894241	0.602403	0.85028	-0.247877	0.606251	0.583978	0.0222728	0.711945	0.906896	-0.194951	0	No	No	1
C10orf99	0.574763	0.8255	-0.250737	#N/A	#N/A	#N/A	0.285659	0.641933	-0.356274	0.285659	0.641933	-0.356274	0.400207	0.752246	-0.352039	0.357291	0.888897	-0.531606	0	No	No	5
C11orf2	0.81925	0.640525	0.178724	0.0481169	0.0565038	-0.00838685	#N/A	#N/A	#N/A	0.310193	0.422887	-0.112694	0.743675	0.703148	0.0405269	0.711172	0.408953	0.302219	1	No	No	0
C11orf36	0.327913	0.60323	-0.275317	0.306707	0.768709	-0.462001	#N/A	#N/A	#N/A	#N/A	#N/A	#N/A	0.332089	0.723116	-0.391027	#N/A	#N/A	#N/A	0	No	No	3
C11orf40	0.373544	0.703097	-0.329553	#N/A	#N/A	#N/A	#N/A	#N/A	#N/A	0.404533	0.869859	-0.465326	0.267351	0.849737	-0.582386	#N/A	#N/A	#N/A	0	No	No	3
C11orf41	0.500571	0.867785	-0.367214	0.341301	0.585847	-0.244546	0.463456	0.855113	-0.391657	0.463456	0.855113	-0.391657	0.753783	0.835411	-0.0816277	0.687613	0.859914	-0.172301	0	No	No	4
C11orf49	0.221824	0.594435	-0.37261	0.0472986	0.0857864	-0.0384878	0.0248932	0.031029	-0.00613582	0.0310337	0.03974	-0.0087063	0.633015	0.643841	-0.0108268	0.718603	0.603383	0.11522	0	No	No	1
C11orf52	0.766775	0.882582	-0.115807	0.72061	0.526696	0.193914	0.772792	0.360738	0.412053	0.772792	0.360738	0.412053	0.66316	0.666807	-0.00364708	0.0380844	0.0443514	-0.006267	2	No	No	0
C11orf53	0.549275	0.767909	-0.218634	0.580391	0.755568	-0.175176	0.672704	0.791593	-0.118889	0.603297	0.843226	-0.239929	0.739417	0.782378	-0.0429615	0.647241	0.552168	0.0950725	0	No	No	2
C11orf60	0.0846344	0.306976	-0.222342	0.0384553	0.0409054	-0.00245014	0.0328134	0.0369309	-0.0041175	0.0328134	0.0369309	-0.0041175	0.95253	0.935231	0.0172991	0.782937	0.884693	-0.101755	0	No	No	1
C11orf64	0.558567	0.820212	-0.261646	0.697828	0.836224	-0.138396	#N/A	#N/A	#N/A	#N/A	#N/A	#N/A	0.523775	0.795911	-0.272136	#N/A	#N/A	#N/A	0	No	No	2
C11orf66	0.756433	0.79009	-0.0336563	0.487276	0.431651	0.0556246	0.559287	0.621455	-0.0621674	#N/A	#N/A	#N/A	0.441503	0.705694	-0.264191	0.569419	0.620832	-0.0514125	0	No	No	1
C11orf70	0.352172	0.387375	-0.0352027	0.0207332	0.0307582	-0.010025	0.064405	0.0890059	-0.0246009	0.0650458	0.0911004	-0.0260546	0.321373	0.524526	-0.203153	#N/A	#N/A	#N/A	0	No	No	1
C11orf74	0.45246	0.697432	-0.244972	0.0437273	0.0554284	-0.011701	0.38526	0.470531	-0.0852709	#N/A	#N/A	#N/A	0.794012	0.924309	-0.130297	#N/A	#N/A	#N/A	0	No	No	1
C11orf85	0.216551	0.562854	-0.346303	0.595483	0.913967	-0.318484	0.444001	0.762487	-0.318487	0.329359	0.778603	-0.449244	0.905819	0.895923	0.00989647	0.875315	0.898587	-0.0232719	0	No	No	4
C11orf88	0.328085	0.455607	-0.127522	0.453676	0.116618	0.337059	#N/A	#N/A	#N/A	0.590667	0.218496	0.372171	0.604281	0.734429	-0.130148	#N/A	#N/A	#N/A	2	No	No	0
C11orf9	0.391071	0.344466	0.0466043	0.784759	0.63289	0.151869	#N/A	#N/A	#N/A	0.00276594	0.00946684	-0.0067009	0.715499	0.619003	0.0964954	0.411729	0.196101	0.215628	1	No	No	0
C12orf36	0.408877	0.764242	-0.355365	#N/A	#N/A	#N/A	#N/A	#N/A	#N/A	#N/A	#N/A	#N/A	0.327001	0.458958	-0.131957	0.613248	0.866729	-0.253481	0	No	No	2
C12orf39	0.446136	0.785003	-0.338867	#N/A	#N/A	#N/A	#N/A	#N/A	#N/A	#N/A	#N/A	#N/A	0.0600145	0.0988281	-0.0388136	#N/A	#N/A	#N/A	0	No	No	1
C12orf40	0.761644	0.909211	-0.147568	0.829992	0.861751	-0.031759	0.789227	0.910387	-0.12116	0.789227	0.910387	-0.12116	0.552168	0.776808	-0.22464	#N/A	#N/A	#N/A	0	No	No	1
C12orf42	0.245201	0.32544	-0.0802391	0.124085	0.100836	0.0232495	0.210082	0.225136	-0.0150543	0.0177303	0.0316021	-0.0138718	0.218875	0.542931	-0.324056	0.382282	0.336405	0.0458773	0	No	No	1
C12orf43	0.314178	0.805831	-0.491652	0.040535	0.092122	-0.051587	0.00237642	0.00803994	-0.00566352	0.0265697	0.0481825	-0.0216128	0.698987	0.56386	0.135127	0.903245	0.89753	0.00571577	0	No	No	1
C12orf50	0.262688	0.495016	-0.232328	#N/A	#N/A	#N/A	0.50318	0.771702	-0.268522	#N/A	#N/A	#N/A	0.0514433	0.0700227	-0.0185794	#N/A	#N/A	#N/A	0	No	No	2
C12orf53	0.159371	0.3677	-0.208328	0.0107819	0.0119407	-0.00115873	0.0868219	0.0872746	-0.000452737	0.10116	0.104001	-0.00284097	0.115918	0.65605	-0.540132	0.30114	0.419791	-0.118651	0	No	No	2
C12orf54	0.565907	0.873335	-0.307428	0.513136	0.894794	-0.381657	0.532676	0.909664	-0.376988	#N/A	#N/A	#N/A	0.32322	0.790748	-0.467528	0.560477	0.927956	-0.36748	0	No	No	5
C12orf59	0.599898	0.872879	-0.272981	#N/A	#N/A	#N/A	0.375384	0.594875	-0.219491	0.375384	0.594875	-0.219491	0.493987	0.773446	-0.279459	0.0736843	0.314818	-0.241134	0	No	No	5
C12orf63	#N/A	#N/A	#N/A	#N/A	#N/A	#N/A	0.560728	0.888578	-0.32785	#N/A	#N/A	#N/A	0.363477	0.800494	-0.437017	#N/A	#N/A	#N/A	0	No	No	2
C12orf70	0.903014	0.915957	-0.0129433	#N/A	#N/A	#N/A	0.76223	0.764087	-0.00185678	#N/A	#N/A	#N/A	0.232147	0.682022	-0.449876	#N/A	#N/A	#N/A	0	No	No	1
C12orf74	0.506861	0.831473	-0.324612	0.775694	0.893243	-0.117548	0.775486	0.934014	-0.158528	0.707828	0.933264	-0.225436	0.767443	0.881112	-0.11367	#N/A	#N/A	#N/A	0	No	No	2
C12orf77	0.160164	0.494854	-0.33469	0.45965	0.892481	-0.432831	#N/A	#N/A	#N/A	#N/A	#N/A	#N/A	0.88698	0.883337	0.00364223	0.8877	0.902155	-0.014455	0	No	No	2
C13orf16	0.724876	0.878707	-0.153831	0.601507	0.827815	-0.226308	0.713988	0.698019	0.0159694	0.680356	0.65409	0.0262656	0.524594	0.741022	-0.216428	0.686654	0.916036	-0.229382	0	No	No	3
C13orf26	0.745391	0.793623	-0.0482325	0.805374	0.467998	0.337376	0.837793	0.611771	0.226022	0.837793	0.611771	0.226022	0.805719	0.56322	0.242499	#N/A	#N/A	#N/A	4	No	No	0
C13orf28	0.222822	0.765527	-0.542705	#N/A	#N/A	#N/A	0.0988496	0.426526	-0.327676	0.184109	0.611587	-0.427478	0.339131	0.628392	-0.28926	0.321477	0.889166	-0.56769	0	No	No	5
C13orf29	0.156932	0.275028	-0.118096	0.0904643	0.205139	-0.114674	#N/A	#N/A	#N/A	#N/A	#N/A	#N/A	0.220294	0.538918	-0.318623	#N/A	#N/A	#N/A	0	No	No	1
C13orf35	0.842218	0.859439	-0.0172214	0.798566	0.938326	-0.139761	0.665724	0.813075	-0.147351	0.677122	0.883461	-0.206339	0.756961	0.880212	-0.12325	0.729215	0.916937	-0.187721	0	No	No	1
C13orf39	0.519311	0.706545	-0.187234	0.659237	0.907296	-0.248059	#N/A	#N/A	#N/A	0.203092	0.288999	-0.0859069	0.640978	0.861482	-0.220505	#N/A	#N/A	#N/A	0	No	No	2
C14orf105	0.919919	0.926717	-0.00679827	0.392795	0.55654	-0.163746	0.441532	0.72771	-0.286178	0.441532	0.72771	-0.286178	0.642932	0.786345	-0.143413	0.718476	0.919079	-0.200604	0	No	No	3
C14orf106	0.185342	0.435608	-0.250266	0.0219585	0.0326077	-0.0106492	0.231152	0.260076	-0.0289236	0.0312844	0.0404311	-0.00914667	0.92947	0.936503	-0.00703295	#N/A	#N/A	#N/A	0	No	No	1
C14orf115	0.585062	0.639766	-0.0547039	0.579587	0.464497	0.11509	0.607649	0.742773	-0.135124	0.672575	0.584455	0.0881198	0.652447	0.860381	-0.207933	0.574338	0.710912	-0.136574	0	No	No	1
C14orf118	0.423792	0.597463	-0.17367	0.0695541	0.0727748	-0.00322069	0.0458731	0.0546933	-0.00882021	0.00193976	0.00473598	-0.00279622	0.694051	0.911413	-0.217362	0.926614	0.928298	-0.0016841	0	No	No	1
C14orf126	0.413834	0.693766	-0.279932	0.0353829	0.0352583	0.000124559	#N/A	#N/A	#N/A	0.432083	0.452875	-0.0207917	0.240898	0.232993	0.00790461	0.834441	0.726409	0.108032	0	No	No	1
C14orf133	0.0310956	0.0429122	-0.0118166	0.0202383	0.0249936	-0.00475525	0.0340728	0.0366909	-0.00261804	0.0149647	0.0062719	0.00869276	0.823256	0.854218	-0.0309628	0.515975	0.718441	-0.202466	0	No	No	1
C14orf142	0.0494601	0.0653342	-0.0158741	0.0281268	0.037643	-0.00951622	#N/A	#N/A	#N/A	0.030548	0.0442935	-0.0137455	0.0917328	0.456291	-0.364558	0.845215	0.774352	0.0708631	0	No	No	1
C14orf165	0.831286	0.888385	-0.057099	0.733882	0.821694	-0.0878115	#N/A	#N/A	#N/A	#N/A	#N/A	#N/A	0.209554	0.506265	-0.296711	#N/A	#N/A	#N/A	0	No	No	1
C14orf166B	0.534641	0.858637	-0.323997	0.536567	0.894689	-0.358122	0.501053	0.922912	-0.421859	0.501053	0.922912	-0.421859	0.50024	0.68899	-0.18875	0.20386	0.555124	-0.351264	0	No	No	5
C14orf177	0.450723	0.757363	-0.30664	0.20697	0.745857	-0.538887	0.250782	0.699396	-0.448614	0.100109	0.465518	-0.365409	0.431922	0.917598	-0.485676	0.391314	0.774869	-0.383555	0	No	No	6
C14orf180	0.476854	0.69944	-0.222585	0.280773	0.431873	-0.1511	0.39796	0.571802	-0.173842	0.510415	0.601167	-0.0907524	0.467042	0.645146	-0.178104	0.594733	0.864241	-0.269509	0	No	No	2
C14orf23	0.62415	0.203709	0.420441	#N/A	#N/A	#N/A	#N/A	#N/A	#N/A	#N/A	#N/A	#N/A	0.403054	0.218202	0.184851	#N/A	#N/A	#N/A	1	No	No	0
C14orf38	0.559186	0.554811	0.00437471	0.384611	0.16392	0.220691	#N/A	#N/A	#N/A	#N/A	#N/A	#N/A	0.591706	0.698942	-0.107236	#N/A	#N/A	#N/A	1	No	No	0
C14orf53	#N/A	#N/A	#N/A	0.687971	0.892436	-0.204466	#N/A	#N/A	#N/A	#N/A	#N/A	#N/A	0.752011	0.843615	-0.0916044	#N/A	#N/A	#N/A	0	No	No	1
C14orf70	0.573575	0.832841	-0.259266	0.600966	0.87936	-0.278394	#N/A	#N/A	#N/A	#N/A	#N/A	#N/A	0.459748	0.569054	-0.109306	#N/A	#N/A	#N/A	0	No	No	2
C14orf72	0.534608	0.908476	-0.373867	#N/A	#N/A	#N/A	#N/A	#N/A	#N/A	#N/A	#N/A	#N/A	0.48309	0.604349	-0.121259	#N/A	#N/A	#N/A	0	No	No	1
C15orf2	0.467686	0.889421	-0.421735	0.509674	0.913521	-0.403848	0.730358	0.950127	-0.21977	0.594943	0.871357	-0.276414	#N/A	#N/A	#N/A	0.339727	0.727305	-0.387578	0	No	No	5
C15orf21	0.679405	0.457045	0.22236	#N/A	#N/A	#N/A	#N/A	#N/A	#N/A	#N/A	#N/A	#N/A	0.292114	0.285331	0.0067827	#N/A	#N/A	#N/A	1	No	No	0
C15orf23	0.59662	0.745371	-0.148751	0.451544	0.245551	0.205993	0.00720276	0.0104103	-0.00320754	0.00720276	0.0104103	-0.00320754	0.318879	0.336625	-0.0177463	0.783808	0.899298	-0.11549	1	No	No	0
C15orf37	0.705955	0.813589	-0.107634	0.690533	0.339463	0.35107	#N/A	#N/A	#N/A	#N/A	#N/A	#N/A	0.0477406	0.0484895	-0.000748837	#N/A	#N/A	#N/A	1	No	No	0
C15orf43	0.682248	0.789281	-0.107033	0.405081	0.88075	-0.475669	#N/A	#N/A	#N/A	0.728209	0.947167	-0.218958	#N/A	#N/A	#N/A	#N/A	#N/A	#N/A	0	No	No	2
C15orf5	0.752218	0.347055	0.405163	#N/A	#N/A	#N/A	#N/A	#N/A	#N/A	#N/A	#N/A	#N/A	#N/A	#N/A	#N/A	#N/A	#N/A	#N/A	1	No	No	0
C15orf50	0.645235	0.876864	-0.231629	0.432235	0.690788	-0.258553	#N/A	#N/A	#N/A	#N/A	#N/A	#N/A	0.687397	0.833357	-0.14596	#N/A	#N/A	#N/A	0	No	No	2
C15orf53	0.633341	0.789488	-0.156147	0.616601	0.844414	-0.227813	#N/A	#N/A	#N/A	0.707714	0.796531	-0.0888168	0.878245	0.913149	-0.0349038	0.941125	0.929462	0.0116623	0	No	No	1
C15orf55	0.571239	0.738177	-0.166938	0.391509	0.677711	-0.286202	#N/A	#N/A	#N/A	#N/A	#N/A	#N/A	0.765459	0.871587	-0.106127	#N/A	#N/A	#N/A	0	No	No	1
C15orf60	0.662775	0.903755	-0.240979	0.652307	0.902353	-0.250046	0.668286	0.981144	-0.312858	0.759662	0.959402	-0.19974	0.598776	0.826179	-0.227403	#N/A	#N/A	#N/A	0	No	No	4
C16orf38	0.504284	0.711629	-0.207346	#N/A	#N/A	#N/A	#N/A	#N/A	#N/A	0.537029	0.694931	-0.157902	0.817222	0.901382	-0.0841607	#N/A	#N/A	#N/A	0	No	No	1
C16orf45	0.514181	0.75134	-0.237159	0.310368	0.74319	-0.432822	0.0643189	0.0695436	-0.00522469	0.161413	0.474311	-0.312898	0.44386	0.644327	-0.200468	0.891553	0.890782	0.000770333	0	No	No	4
C16orf46	0.246521	0.241571	0.00494995	0.0257979	0.0404238	-0.0146259	0.277907	0.317618	-0.0397108	0.0608314	0.0692464	-0.008415	0.785263	0.647873	0.13739	0.889787	0.689747	0.20004	1	No	No	0
C16orf62	0.375634	0.396886	-0.0212516	0.0268229	0.0341912	-0.0073683	#N/A	#N/A	#N/A	#N/A	#N/A	#N/A	0.518196	0.641002	-0.122806	0.63239	0.329735	0.302655	1	No	No	0
C16orf65	0.295784	0.522156	-0.226372	0.0347798	0.046883	-0.0121032	0.0724892	0.0882173	-0.0157281	0.0724892	0.0882173	-0.0157281	0.608533	0.806314	-0.197781	#N/A	#N/A	#N/A	0	No	No	1
C16orf67	0.519628	0.817633	-0.298005	0.0794325	0.0340449	0.0453876	#N/A	#N/A	#N/A	#N/A	#N/A	#N/A	0.178234	0.240102	-0.0618677	#N/A	#N/A	#N/A	0	No	No	1
C16orf68	0.124663	0.480263	-0.3556	#N/A	#N/A	#N/A	0.152354	0.144444	0.00791002	0.00830468	0.0111626	-0.00285787	0.814574	0.807346	0.00722738	0.874609	0.898425	-0.0238159	0	No	No	1
C16orf71	0.0524933	0.068277	-0.0157836	0.0138464	0.0187623	-0.00491588	0.059986	0.0563108	0.00367515	0.0694167	0.0609511	0.00846564	0.663502	0.645182	0.0183199	0.897538	0.619019	0.278519	1	No	No	0
C16orf75	0.265849	0.275606	-0.00975655	0.0279181	0.0370468	-0.00912869	#N/A	#N/A	#N/A	0.0613438	0.0537107	0.00763308	0.274292	0.305164	-0.0308717	0.360418	0.765404	-0.404986	0	No	No	1
C16orf78	0.337374	0.882255	-0.544881	0.145566	0.740142	-0.594576	#N/A	#N/A	#N/A	0.197243	0.612515	-0.415272	0.364849	0.915244	-0.550395	#N/A	#N/A	#N/A	0	No	No	4
C16orf81	0.477754	0.724938	-0.247183	0.443873	0.858433	-0.41456	#N/A	#N/A	#N/A	#N/A	#N/A	#N/A	0.431894	0.750284	-0.31839	#N/A	#N/A	#N/A	0	No	No	3
C16orf82	0.587007	0.905719	-0.318713	0.258251	0.471364	-0.213113	#N/A	#N/A	#N/A	0.39623	0.633021	-0.236791	#N/A	#N/A	#N/A	0.599312	0.809023	-0.209711	0	No	No	4
C16orf89	0.705912	0.859152	-0.153241	0.322191	0.54769	-0.225499	#N/A	#N/A	#N/A	0.47183	0.724215	-0.252385	0.657624	0.73261	-0.0749864	0.743602	0.882738	-0.139135	0	No	No	2
C16orf91	0.657382	0.778384	-0.121001	0.419834	0.633281	-0.213447	#N/A	#N/A	#N/A	0.808782	0.81569	-0.0069079	0.416017	0.493893	-0.0778761	#N/A	#N/A	#N/A	0	No	No	1
C16orf92	0.341286	0.519892	-0.178607	0.641144	0.701786	-0.0606414	#N/A	#N/A	#N/A	#N/A	#N/A	#N/A	0.492312	0.732982	-0.240671	0.767889	0.720216	0.047673	0	No	No	1
C17orf102	0.0530198	0.0589483	-0.00592857	0.0380621	0.00538092	0.0326812	#N/A	#N/A	#N/A	0.102944	0.079726	0.0232182	0.321484	0.657765	-0.336282	0.451423	0.903285	-0.451862	0	No	No	2
C17orf105	0.0282252	0.0339894	-0.00576421	0.693264	0.646568	0.0466962	#N/A	#N/A	#N/A	0.932035	0.898394	0.0336417	0.953238	0.948036	0.00520193	0.613814	0.890838	-0.277023	0	No	No	1
C17orf107	0.667668	0.328381	0.339287	0.512309	0.0543145	0.457995	0.567224	0.0857316	0.481492	0.567224	0.0857316	0.481492	0.821093	0.542246	0.278847	0.755574	0.649499	0.106075	5	No	No	0
C17orf28	0.140693	0.306161	-0.165468	0.0491283	0.045956	0.00317235	0.0505818	0.0829504	-0.0323687	0.0530613	0.069862	-0.0168007	0.24606	0.560925	-0.314865	0.725515	0.990489	-0.264975	0	Yes	No	2
C17orf44	0.518705	0.832237	-0.313532	0.272653	0.280367	-0.0077137	#N/A	#N/A	#N/A	#N/A	#N/A	#N/A	0.0819517	0.109152	-0.0272001	#N/A	#N/A	#N/A	0	No	No	1
C17orf47	0.694715	0.894403	-0.199688	#N/A	#N/A	#N/A	0.231809	0.761899	-0.53009	0.31497	0.770443	-0.455473	0.694758	0.804683	-0.109925	#N/A	#N/A	#N/A	0	No	No	2
C17orf50	0.528168	0.811586	-0.283418	#N/A	#N/A	#N/A	#N/A	#N/A	#N/A	#N/A	#N/A	#N/A	0.315239	0.351315	-0.0360762	0.367203	0.446873	-0.0796702	0	No	No	1
C17orf54	0.530223	0.910118	-0.379895	0.305159	0.776743	-0.471584	#N/A	#N/A	#N/A	#N/A	#N/A	#N/A	0.518867	0.730561	-0.211695	#N/A	#N/A	#N/A	0	No	No	3
C17orf66	0.793511	0.821996	-0.0284851	0.704264	0.828657	-0.124393	#N/A	#N/A	#N/A	#N/A	#N/A	#N/A	0.453054	0.785368	-0.332313	0.671237	0.702847	-0.0316102	0	No	No	1
C17orf67	0.887397	0.91695	-0.0295527	0.560302	0.790762	-0.23046	#N/A	#N/A	#N/A	0.528403	0.758022	-0.229619	0.871308	0.924787	-0.0534786	0.786251	0.833675	-0.0474237	0	No	No	2
C17orf69	0.339324	0.615948	-0.276624	#N/A	#N/A	#N/A	#N/A	#N/A	#N/A	#N/A	#N/A	#N/A	0.519248	0.674869	-0.155621	#N/A	#N/A	#N/A	0	No	No	1
C17orf74	0.710005	0.861809	-0.151804	0.558745	0.757448	-0.198703	#N/A	#N/A	#N/A	0.341193	0.646887	-0.305694	0.78374	0.842614	-0.0588732	#N/A	#N/A	#N/A	0	No	No	1
C17orf77	0.206181	0.778498	-0.572316	0.234869	0.703391	-0.468522	0.321148	0.850657	-0.529509	0.279867	0.680919	-0.401051	0.108365	0.731635	-0.62327	0.362196	0.816333	-0.454137	0	No	No	6
C17orf88	0.685025	0.827016	-0.141991	0.830164	0.823876	0.00628825	#N/A	#N/A	#N/A	#N/A	#N/A	#N/A	0.520732	0.181805	0.338927	#N/A	#N/A	#N/A	1	No	No	0
C17orf93	0.280234	0.165679	0.114554	0.0833712	0.0953871	-0.0120159	#N/A	#N/A	#N/A	#N/A	#N/A	#N/A	0.401918	0.179447	0.222471	#N/A	#N/A	#N/A	1	No	No	0
C17orf98	0.84758	0.865077	-0.0174974	0.84963	0.604666	0.244964	#N/A	#N/A	#N/A	0.891317	0.590372	0.300945	0.912075	0.769045	0.143029	0.25636	0.606958	-0.350597	2	No	No	1
C18orf16	0.126512	0.517375	-0.390864	0.349423	0.780361	-0.430938	#N/A	#N/A	#N/A	#N/A	#N/A	#N/A	0.423088	0.767304	-0.344215	#N/A	#N/A	#N/A	0	No	No	3
C18orf20	0.35496	0.868557	-0.513597	#N/A	#N/A	#N/A	#N/A	#N/A	#N/A	#N/A	#N/A	#N/A	0.453398	0.793015	-0.339617	#N/A	#N/A	#N/A	0	No	No	2
C18orf26	0.259861	0.835312	-0.575451	0.162601	0.782576	-0.619975	#N/A	#N/A	#N/A	#N/A	#N/A	#N/A	0.175455	0.88852	-0.713065	0.151762	0.641091	-0.489329	0	No	No	4
C18orf34	0.104925	0.137625	-0.0326998	0.019751	0.0317368	-0.0119858	0.137015	0.319893	-0.182878	0.16553	0.278198	-0.112668	0.797549	0.893739	-0.0961893	0.578433	0.901212	-0.322779	0	Yes	No	1
C18orf45	0.322257	0.602206	-0.27995	0.0148571	0.0155232	-0.000666037	0.00370785	0.00822076	-0.00451291	0.0298558	0.0397807	-0.00992498	0.417123	0.343552	0.0735713	0.937434	0.937755	-0.000321367	0	No	No	1
C19orf18	0.80777	0.852462	-0.0446921	#N/A	#N/A	#N/A	#N/A	#N/A	#N/A	0.866735	0.939284	-0.0725491	0.630053	0.902064	-0.272011	0.539067	0.632643	-0.0935757	0	No	No	1
C19orf20	0.0548019	0.0681225	-0.0133206	0.0350861	0.0407927	-0.00570659	#N/A	#N/A	#N/A	0.0280547	0.0340949	-0.00604016	0.640678	0.597155	0.0435235	0.946554	0.669481	0.277072	1	No	No	0
C19orf21	0.725433	0.69496	0.0304724	0.473023	0.451302	0.0217213	0.513733	0.478783	0.0349498	0.366243	0.367066	-0.0008224	0.810792	0.842969	-0.0321768	0.64912	0.880048	-0.230928	0	No	No	1
C19orf30	0.244165	0.917108	-0.672943	0.105619	0.285556	-0.179936	#N/A	#N/A	#N/A	#N/A	#N/A	#N/A	0.153462	0.256975	-0.103513	#N/A	#N/A	#N/A	0	No	No	1
C19orf33	0.779537	0.626379	0.153158	0.675512	0.443185	0.232327	0.722831	0.658323	0.0645075	0.722831	0.658323	0.0645075	0.910586	0.901512	0.00907387	#N/A	#N/A	#N/A	1	No	No	0
C19orf36	0.0825093	0.31491	-0.2324	0.0143197	0.0173218	-0.0030021	0.00586637	0.00404158	0.00182479	0.0256382	0.0275353	-0.00189709	0.307717	0.367863	-0.0601462	0.781879	0.789268	-0.0073888	0	No	No	1
C19orf39	0.135692	0.513348	-0.377656	0.0371047	0.0455954	-0.00849073	0.00102978	0.00208618	-0.00105641	0.0396465	0.0505333	-0.0108868	0.0563239	0.0188906	0.0374333	0.910397	0.941831	-0.031434	0	No	No	1
C19orf41	0.463425	0.722183	-0.258758	0.229354	0.123512	0.105842	0.122381	0.133513	-0.0111321	0.174704	0.18016	-0.00545661	0.378662	0.7251	-0.346438	0.188322	0.772778	-0.584457	0	No	No	3
C19orf45	0.418675	0.814479	-0.395804	0.263742	0.453626	-0.189884	0.624791	0.786315	-0.161525	0.817882	0.892361	-0.0744788	0.243418	0.22406	0.0193584	#N/A	#N/A	#N/A	0	No	No	1
C19orf50	0.42954	0.504655	-0.0751153	0.0414967	0.0508975	-0.00940073	0.33953	0.316791	0.0227384	#N/A	#N/A	#N/A	#N/A	#N/A	#N/A	0.498958	0.779158	-0.2802	0	No	No	1
C19orf51	0.0409633	0.0410679	-0.000104572	0.0642688	0.0716929	-0.00742405	#N/A	#N/A	#N/A	0.0462193	0.062011	-0.0157917	0.279553	0.327431	-0.0478785	0.355358	0.597593	-0.242235	0	No	No	1
C19orf59	0.196328	0.418005	-0.221677	0.388644	0.583593	-0.194949	0.122207	0.594372	-0.472166	0.122207	0.594372	-0.472166	0.352678	0.669554	-0.316876	0.0464201	0.141636	-0.0952161	0	No	No	4
C19orf66	0.268693	0.390757	-0.122063	0.00426154	0.00409567	0.000165867	0.0163806	0.0362415	-0.0198609	0.0163806	0.0362415	-0.0198609	0.319068	0.372813	-0.0537446	0.63612	0.854081	-0.217961	0	No	No	1
C19orf69	0.586231	0.758049	-0.171818	0.287635	0.512388	-0.224753	#N/A	#N/A	#N/A	#N/A	#N/A	#N/A	0.284676	0.699869	-0.415193	0.609452	0.836062	-0.226609	0	No	No	3
C19orf75	#N/A	#N/A	#N/A	#N/A	#N/A	#N/A	0.113849	0.36169	-0.247841	0.188526	0.680314	-0.491788	0.304395	0.89376	-0.589365	0.236649	0.794295	-0.557645	0	No	No	4
C19orf77	0.647027	0.597714	0.0493136	0.476377	0.369222	0.107154	0.354616	0.233429	0.121187	0.354616	0.233429	0.121187	0.256944	0.266042	-0.0090974	0.367253	0.759224	-0.391972	0	No	No	1
C1D	0.290694	0.531629	-0.240935	0.00893069	0.0103582	-0.00142752	0.0390097	0.0469437	-0.00793396	#N/A	#N/A	#N/A	0.702972	0.83994	-0.136968	0.825892	0.844689	-0.0187973	0	No	No	1
C1GALT1C1	0.211905	0.36405	-0.152145	0.301181	0.532506	-0.231326	0.285819	0.427795	-0.141976	0.327	0.416892	-0.0898925	0.839743	0.866379	-0.026636	0.656965	0.56033	0.0966349	0	No	No	1
C1orf100	0.770382	0.828123	-0.0577412	0.886456	0.917116	-0.0306602	0.43429	0.412948	0.0213411	0.643842	0.642596	0.0012463	0.579052	0.627484	-0.0484321	0.414183	0.824213	-0.410029	0	No	No	1
C1orf101	0.509136	0.734399	-0.225263	0.0392788	0.0481078	-0.00882899	#N/A	#N/A	#N/A	0.0313439	0.0365981	-0.00525416	0.539576	0.603279	-0.063703	#N/A	#N/A	#N/A	0	No	No	1
C1orf105	#N/A	#N/A	#N/A	#N/A	#N/A	#N/A	#N/A	#N/A	#N/A	#N/A	#N/A	#N/A	0.365675	0.406056	-0.040381	0.616602	0.886296	-0.269693	0	No	No	1
C1orf107	0.466583	0.733523	-0.26694	0.0627405	0.0776865	-0.014946	0.0400958	0.0400673	2.8455e-05	0.0400871	0.0449034	-0.00481631	0.5001	0.482166	0.0179337	0.814223	0.748783	0.0654394	0	No	No	1
C1orf110	0.734297	0.817867	-0.0835697	0.629256	0.695827	-0.0665716	0.609439	0.814759	-0.20532	#N/A	#N/A	#N/A	0.462198	0.838842	-0.376644	#N/A	#N/A	#N/A	0	No	No	2
C1orf111	0.54095	0.766943	-0.225992	#N/A	#N/A	#N/A	0.726443	0.893112	-0.166669	0.763667	0.914907	-0.15124	0.704014	0.825616	-0.121602	0.598917	0.747342	-0.148425	0	No	No	1
C1orf114	0.299539	0.561754	-0.262215	0.0345054	0.0527232	-0.0182177	0.35923	0.459069	-0.0998395	0.0327047	0.05049	-0.0177853	#N/A	#N/A	#N/A	#N/A	#N/A	#N/A	0	No	No	1
C1orf115	0.180005	0.183513	-0.00350835	0.0774814	0.0930578	-0.0155764	#N/A	#N/A	#N/A	0.0762116	0.0532204	0.0229912	0.565374	0.297041	0.268333	0.721108	0.916091	-0.194983	1	No	No	0
C1orf125	0.429124	0.669708	-0.240583	0.0628321	0.154272	-0.0914404	0.0531992	0.0566727	-0.00347352	0.0675863	0.0813678	-0.0137816	0.298698	0.674595	-0.375898	#N/A	#N/A	#N/A	0	No	No	2
C1orf129	#N/A	#N/A	#N/A	0.60604	0.898115	-0.292075	0.465248	0.830532	-0.365284	#N/A	#N/A	#N/A	0.145733	0.699334	-0.553601	#N/A	#N/A	#N/A	0	No	No	3
C1orf130	0.237949	0.231159	0.00679087	0.170313	0.1326	0.0377133	0.189629	0.39937	-0.209741	#N/A	#N/A	#N/A	0.553141	0.844036	-0.290896	#N/A	#N/A	#N/A	0	No	No	2
C1orf14	0.814695	0.747365	0.0673298	0.86377	0.73866	0.12511	0.857902	0.846226	0.0116753	0.654909	0.692251	-0.037342	0.403201	0.624255	-0.221054	#N/A	#N/A	#N/A	0	No	No	1
C1orf141	0.764229	0.865232	-0.101002	0.855034	0.872055	-0.0170213	#N/A	#N/A	#N/A	#N/A	#N/A	#N/A	0.575425	0.879475	-0.30405	#N/A	#N/A	#N/A	0	No	No	1
C1orf144	0.417075	0.671766	-0.254691	0.0570175	0.0604308	-0.00341328	0.0346629	0.0270871	0.00757583	0.0346629	0.0270871	0.00757583	0.440639	0.377579	0.06306	0.135495	0.21019	-0.0746952	0	No	No	1
C1orf146	0.377276	0.930348	-0.553072	0.642525	0.870096	-0.227571	0.810187	0.907559	-0.0973717	#N/A	#N/A	#N/A	0.626479	0.839407	-0.212928	#N/A	#N/A	#N/A	0	No	No	3
C1orf150	0.260383	0.823691	-0.563308	0.0658041	0.80449	-0.738686	#N/A	#N/A	#N/A	0.250843	0.903912	-0.653069	0.219659	0.858676	-0.639018	0.200988	0.60449	-0.403502	0	No	No	5
C1orf158	0.244468	0.702573	-0.458105	0.113529	0.460156	-0.346627	#N/A	#N/A	#N/A	#N/A	#N/A	#N/A	0.382926	0.873347	-0.490421	0.409867	0.790961	-0.381094	0	No	No	4
C1orf161	0.565384	0.752536	-0.187151	#N/A	#N/A	#N/A	0.567285	0.53339	0.0338954	0.32145	0.158491	0.162959	0.415638	0.69697	-0.281331	0.778051	0.899135	-0.121084	0	No	No	1
C1orf168	0.637173	0.837786	-0.200613	0.397688	0.436925	-0.0392378	0.788625	0.775119	0.0135058	0.788625	0.775119	0.0135058	0.308513	0.796767	-0.488254	#N/A	#N/A	#N/A	0	No	No	2
C1orf170	0.550654	0.597458	-0.0468045	0.209874	0.455477	-0.245602	#N/A	#N/A	#N/A	#N/A	#N/A	#N/A	0.380293	0.55397	-0.173678	#N/A	#N/A	#N/A	0	No	No	1
C1orf172	0.661415	0.598463	0.0629522	0.254858	0.0346298	0.220228	0.397027	0.408559	-0.0115323	#N/A	#N/A	#N/A	0.867994	0.909244	-0.0412502	#N/A	#N/A	#N/A	1	No	No	0
C1orf173	0.446393	0.61542	-0.169027	0.0728486	0.0795486	-0.0067	0.0559506	0.0815801	-0.0256294	0.0559506	0.0815801	-0.0256294	0.295319	0.517916	-0.222597	0.733921	0.950499	-0.216577	0	No	No	2
C1orf177	0.850665	0.889531	-0.0388663	0.854258	0.540445	0.313814	#N/A	#N/A	#N/A	#N/A	#N/A	#N/A	0.834158	0.70478	0.129378	0.765738	0.890925	-0.125186	1	No	No	0
C1orf182	0.740676	0.538047	0.202629	#N/A	#N/A	#N/A	0.0745843	0.09113	-0.0165457	0.111683	0.125219	-0.0135356	0.891223	0.913832	-0.0226085	#N/A	#N/A	#N/A	1	No	No	0
C1orf187	0.108333	0.131111	-0.0227786	0.0429888	0.0430994	-0.000110547	0.276533	0.341553	-0.0650197	0.0598415	0.0255637	0.0342778	0.239797	0.553719	-0.313922	0.16672	0.29315	-0.12643	0	No	No	1
C1orf192	0.912006	0.907757	0.00424843	0.388489	0.266816	0.121673	#N/A	#N/A	#N/A	#N/A	#N/A	#N/A	#N/A	#N/A	#N/A	0.193028	0.633301	-0.440273	0	No	No	1
C1orf201	0.91629	0.931415	-0.0151248	0.881358	0.945918	-0.06456	#N/A	#N/A	#N/A	0.613091	0.860853	-0.247762	0.534332	0.593979	-0.0596473	0.86553	0.90889	-0.04336	0	No	No	1
C1orf210	0.791241	0.643822	0.147419	0.810024	0.471645	0.338379	0.655975	0.564761	0.0912144	0.520849	0.368892	0.151957	0.49557	0.821886	-0.326316	0.512038	0.687286	-0.175248	1	No	No	1
C1orf226	0.560189	0.828484	-0.268294	0.511302	0.805723	-0.294421	0.631377	0.889123	-0.257745	0.672743	0.889642	-0.216898	0.557422	0.864859	-0.307436	0.80156	0.860615	-0.0590547	0	No	No	5
C1orf52	0.341821	0.399986	-0.0581649	0.0302473	0.040538	-0.0102907	0.0392143	0.050772	-0.0115578	0.0241348	0.0401799	-0.016045	0.266253	0.317735	-0.0514823	0.49761	0.727329	-0.229719	0	No	No	1
C1orf65	0.520265	0.682221	-0.161956	0.426083	0.352301	0.0737827	0.369505	0.36157	0.00793457	0.525074	0.60817	-0.0830955	#N/A	#N/A	#N/A	0.707207	0.910066	-0.202859	0	No	No	1
C1orf68	0.425837	0.857223	-0.431386	#N/A	#N/A	#N/A	#N/A	#N/A	#N/A	0.440809	0.871562	-0.430753	#N/A	#N/A	#N/A	#N/A	#N/A	#N/A	0	No	No	2
C1orf70	0.747821	0.706771	0.0410504	0.246342	0.0114094	0.234933	0.323249	0.118163	0.205086	0.265706	0.0624429	0.203263	0.743335	0.700673	0.0426622	0.864881	0.822061	0.0428197	3	No	No	0
C1orf87	0.859251	0.713657	0.145594	0.523743	0.229242	0.294501	0.802057	0.600455	0.201602	0.847352	0.44902	0.398331	0.651296	0.874557	-0.223261	#N/A	#N/A	#N/A	3	No	No	1
C1orf88	0.0404826	0.0503446	-0.00986198	0.0530126	0.0601278	-0.00711525	0.0629859	0.060365	0.00262087	0.0629859	0.060365	0.00262087	0.470489	0.53612	-0.0656301	0.706208	0.92089	-0.214682	0	No	No	1
C1orf94	0.270683	0.36147	-0.0907868	0.421549	0.218308	0.203241	0.303881	0.447769	-0.143888	0.0684422	0.101945	-0.033503	0.263517	0.73212	-0.468603	#N/A	#N/A	#N/A	1	No	No	1
C1orf96	0.232953	0.332823	-0.0998708	#N/A	#N/A	#N/A	0.0234212	0.0288721	-0.00545087	#N/A	#N/A	#N/A	0.259099	0.317141	-0.0580418	0.655714	0.907405	-0.251691	0	No	No	1
C1QA	0.290653	0.446102	-0.155449	0.381278	0.515694	-0.134416	0.467514	0.672983	-0.205469	#N/A	#N/A	#N/A	0.664631	0.892332	-0.227701	0.0497672	0.150537	-0.10077	0	No	No	2
C1QB	0.476858	0.70673	-0.229872	0.563597	0.794354	-0.230757	0.469085	0.777136	-0.30805	0.649076	0.751056	-0.10198	0.766239	0.829511	-0.0632721	0.726379	0.896691	-0.170312	0	No	No	3
C1QC	0.0629081	0.146865	-0.0839568	0.542892	0.76836	-0.225469	0.455887	0.664868	-0.208981	0.303919	0.620829	-0.31691	0.75983	0.827514	-0.0676842	#N/A	#N/A	#N/A	0	No	No	3
C1QL1	0.198505	0.279818	-0.0813136	#N/A	#N/A	#N/A	#N/A	#N/A	#N/A	0.0801163	0.0669629	0.0131533	0.319149	0.271937	0.0472122	0.696677	0.185697	0.510981	1	Yes	No	0
C1QL3	0.600956	0.909096	-0.30814	0.321749	0.645832	-0.324082	0.0914375	0.0940302	-0.00259267	0.0606709	0.0629268	-0.00225595	0.460899	0.616563	-0.155664	0.239373	0.928076	-0.688703	0	No	No	3
C1QL4	0.565887	0.520296	0.0455919	0.0376676	0.0622556	-0.024588	0.0525231	0.0862706	-0.0337475	0.27587	0.152798	0.123072	0.855445	0.643281	0.212165	0.837741	0.794468	0.0432733	1	No	No	0
C1QTNF3	0.868071	0.909578	-0.041507	0.231533	0.216568	0.0149643	0.264991	0.285004	-0.0200127	0.313282	0.486663	-0.173381	0.337428	0.587493	-0.250065	0.886953	0.942303	-0.0553496	0	No	No	1
C1QTNF8	0.382153	0.773161	-0.391008	0.481132	0.783053	-0.30192	0.27449	0.653112	-0.378622	0.260199	0.732695	-0.472497	0.64483	0.527713	0.117118	0.455026	0.667214	-0.212189	0	No	No	5
C1QTNF9	0.602047	0.731319	-0.129272	#N/A	#N/A	#N/A	0.522637	0.748726	-0.226089	#N/A	#N/A	#N/A	0.531013	0.863025	-0.332012	0.480923	0.844248	-0.363325	0	No	No	3
C1R	0.135173	0.146499	-0.0113259	0.0377257	0.0433502	-0.00562441	0.0195621	0.0211371	-0.00157503	0.0195621	0.0211371	-0.00157503	0.738716	0.616439	0.122277	0.573333	0.788845	-0.215512	0	No	No	1
C1S	0.69056	0.69176	-0.00120013	0.0940344	0.13855	-0.0445155	0.4191	0.407175	0.0119249	0.0907457	0.131002	-0.0402566	0.591873	0.574119	0.0177543	0.667831	0.927796	-0.259964	0	No	No	1
C20orf103	0.192093	0.180934	0.0111591	0.110716	0.0909406	0.0197754	0.0430773	0.0525746	-0.00949722	0.0430773	0.0525746	-0.00949722	0.198158	0.195432	0.00272578	0.233242	0.8329	-0.599658	0	Yes	No	1
C20orf106	0.787885	0.837178	-0.0492932	0.561826	0.83632	-0.274494	0.591782	0.755862	-0.16408	0.591782	0.755862	-0.16408	0.570607	0.868201	-0.297594	#N/A	#N/A	#N/A	0	No	No	2
C20orf107	0.554919	0.892969	-0.338051	0.514665	0.852769	-0.338103	0.480785	0.747398	-0.266613	0.480785	0.747398	-0.266613	0.607078	0.873918	-0.266841	#N/A	#N/A	#N/A	0	No	No	5
C20orf114	0.505193	0.863876	-0.358683	0.372116	0.742833	-0.370717	0.503726	0.772426	-0.268699	0.636843	0.846179	-0.209336	0.0105569	0.0160853	-0.00552835	#N/A	#N/A	#N/A	0	No	No	4
C20orf123	0.62566	0.736328	-0.110668	0.545512	0.762327	-0.216815	#N/A	#N/A	#N/A	0.128768	0.577613	-0.448846	0.432393	0.619482	-0.187089	0.767553	0.911561	-0.144008	0	No	No	2
C20orf151	0.54099	0.720193	-0.179204	0.613958	0.749209	-0.13525	0.617698	0.681274	-0.063576	#N/A	#N/A	#N/A	0.566814	0.874132	-0.307318	0.0749908	0.0904088	-0.0154181	0	No	No	1
C20orf160	0.338576	0.64829	-0.309715	#N/A	#N/A	#N/A	#N/A	#N/A	#N/A	#N/A	#N/A	#N/A	0.221653	0.352205	-0.130553	0.282938	0.423852	-0.140914	0	No	No	1
C20orf166	0.329522	0.406943	-0.0774217	0.0895643	0.110382	-0.0208176	0.196251	0.248799	-0.0525484	0.0505626	0.0470529	0.00350962	0.484985	0.709671	-0.224686	0.354271	0.738177	-0.383906	0	No	No	2
C20orf185	0.427844	0.645246	-0.217402	0.329855	0.791357	-0.461502	#N/A	#N/A	#N/A	0.553411	0.754351	-0.20094	0.664741	0.920916	-0.256175	#N/A	#N/A	#N/A	0	No	No	4
C20orf186	0.472688	0.717206	-0.244518	0.731936	0.887556	-0.15562	#N/A	#N/A	#N/A	0.362582	0.693983	-0.3314	0.17391	0.504522	-0.330612	0.370751	0.753069	-0.382318	0	No	No	4
C20orf197	0.469828	0.693831	-0.224003	0.493987	0.697286	-0.203299	0.432243	0.597444	-0.165201	0.432243	0.597444	-0.165201	0.572345	0.83743	-0.265085	0.558186	0.68398	-0.125794	0	No	No	3
C20orf200	0.188281	0.250282	-0.0620014	0.0367284	0.055266	-0.0185376	0.16579	0.19846	-0.0326703	0.0606064	0.0731555	-0.0125491	0.624863	0.887986	-0.263123	0.680402	0.859919	-0.179517	0	No	No	1
C20orf202	0.425585	0.882693	-0.457109	0.163777	0.347698	-0.183921	#N/A	#N/A	#N/A	0.157637	0.409632	-0.251995	0.246673	0.660842	-0.414169	0.467902	0.897461	-0.429559	0	No	No	4
C20orf24	0.197378	0.459416	-0.262037	#N/A	#N/A	#N/A	0.0505165	0.0671106	-0.016594	0.0505165	0.0671106	-0.016594	0.279488	0.301553	-0.0220653	0.502256	0.658978	-0.156721	0	No	No	1
C20orf26	0.435192	0.545497	-0.110305	0.0866247	0.201482	-0.114857	0.395087	0.575998	-0.180911	0.000996825	0.00172944	-0.000732619	0.299766	0.492597	-0.192831	0.149874	0.479137	-0.329263	0	No	No	1
C20orf46	0.0851371	0.11166	-0.0265227	0.289319	0.505147	-0.215828	0.472109	0.459505	0.0126034	0.472109	0.459505	0.0126034	0.660081	0.805408	-0.145326	0.530282	0.824656	-0.294374	0	No	No	2
C20orf54	0.279847	0.43554	-0.155693	0.365846	0.486384	-0.120538	0.243225	0.435315	-0.19209	0.243225	0.435315	-0.19209	0.41683	0.607364	-0.190534	0.412609	0.727127	-0.314518	0	No	No	1
C20orf70	0.489834	0.808767	-0.318933	0.42343	0.827561	-0.404131	0.272652	0.852279	-0.579627	0.280449	0.850964	-0.570514	0.163304	0.270466	-0.107162	0.59178	0.888496	-0.296715	0	No	No	5
C20orf71	0.177337	0.751226	-0.573889	#N/A	#N/A	#N/A	0.212453	0.713952	-0.501498	0.212453	0.713952	-0.501498	#N/A	#N/A	#N/A	#N/A	#N/A	#N/A	0	No	No	3
C20orf79	0.603511	0.829959	-0.226448	0.633961	0.723523	-0.0895616	#N/A	#N/A	#N/A	0.735844	0.87103	-0.135186	#N/A	#N/A	#N/A	0.654775	0.82145	-0.166675	0	No	No	1
C20orf85	0.607848	0.601813	0.00603532	0.724452	0.476497	0.247955	0.782177	0.62307	0.159107	0.782177	0.62307	0.159107	0.684378	0.697281	-0.0129033	0.768809	0.781103	-0.0122944	1	No	No	0
C20orf95	0.165355	0.507652	-0.342297	0.110394	0.147074	-0.0366796	#N/A	#N/A	#N/A	0.28188	0.278838	0.00304233	0.156387	0.450359	-0.293972	0.313306	0.737744	-0.424439	0	No	No	3
C21orf129	0.607551	0.793385	-0.185834	0.388956	0.663251	-0.274296	#N/A	#N/A	#N/A	#N/A	#N/A	#N/A	0.536019	0.733439	-0.197419	#N/A	#N/A	#N/A	0	No	No	1
C21orf130	0.476256	0.866672	-0.390416	0.448275	0.781826	-0.333551	#N/A	#N/A	#N/A	#N/A	#N/A	#N/A	0.240325	0.420956	-0.180631	#N/A	#N/A	#N/A	0	No	No	2
C21orf131	#N/A	#N/A	#N/A	0.384612	0.671394	-0.286782	#N/A	#N/A	#N/A	#N/A	#N/A	#N/A	0.68084	0.879136	-0.198296	#N/A	#N/A	#N/A	0	No	No	1
C21orf15	0.301611	0.784299	-0.482688	0.173344	0.424801	-0.251457	#N/A	#N/A	#N/A	#N/A	#N/A	#N/A	0.182032	0.55651	-0.374477	#N/A	#N/A	#N/A	0	No	No	3
C21orf29	0.0888972	0.103289	-0.0143914	0.0479202	0.0577688	-0.00984864	0.114243	0.143009	-0.0287656	0.114243	0.143009	-0.0287656	0.300971	0.652611	-0.35164	0.400247	0.833999	-0.433752	0	Yes	No	2
C21orf54	0.358192	0.738666	-0.380474	#N/A	#N/A	#N/A	#N/A	#N/A	#N/A	#N/A	#N/A	#N/A	0.445428	0.870066	-0.424638	#N/A	#N/A	#N/A	0	No	No	2
C21orf62	0.902018	0.928498	-0.0264802	0.72613	0.393308	0.332823	0.666028	0.613678	0.0523492	0.798185	0.659211	0.138974	0.868894	0.882377	-0.0134831	0.8078	0.887687	-0.0798868	1	No	No	0
C21orf7	0.778053	0.725707	0.0523459	0.422389	0.612105	-0.189715	0.676122	0.672911	0.00321078	0.548136	0.788517	-0.240381	0.359095	0.124576	0.234519	0.512783	0.383654	0.129129	1	No	No	1
C21orf90	0.433859	0.868879	-0.43502	#N/A	#N/A	#N/A	#N/A	#N/A	#N/A	#N/A	#N/A	#N/A	0.339601	0.653103	-0.313502	#N/A	#N/A	#N/A	0	No	No	2
C21orf94	0.3221	0.541039	-0.218939	#N/A	#N/A	#N/A	#N/A	#N/A	#N/A	#N/A	#N/A	#N/A	0.516328	0.678889	-0.162561	#N/A	#N/A	#N/A	0	No	No	1
C21orf99	0.430248	0.753566	-0.323318	0.357295	0.55302	-0.195725	#N/A	#N/A	#N/A	#N/A	#N/A	#N/A	0.262527	0.532489	-0.269962	#N/A	#N/A	#N/A	0	No	No	2
C22orf15	0.795579	0.818908	-0.0233288	0.622557	0.558646	0.0639111	0.313243	0.433845	-0.120602	0.313243	0.433845	-0.120602	0.706997	0.348455	0.358541	0.536319	0.642628	-0.106309	1	No	No	0
C22orf24	0.109042	0.142355	-0.0333132	0.0506762	0.05688	-0.00620377	0.0957138	0.102874	-0.00716028	0.0591111	0.0623464	-0.00323533	0.744461	0.842002	-0.0975409	0.288294	0.550854	-0.26256	0	No	No	1
C22orf27	0.0661367	0.170627	-0.104491	0.0910907	0.332296	-0.241206	#N/A	#N/A	#N/A	#N/A	#N/A	#N/A	0.37032	0.651961	-0.281642	#N/A	#N/A	#N/A	0	No	No	2
C22orf28	0.266964	0.571307	-0.304343	#N/A	#N/A	#N/A	0.0448203	0.0563149	-0.0114946	0.0448203	0.0563149	-0.0114946	0.253949	0.245515	0.00843389	0.901356	0.798574	0.102782	0	No	No	1
C22orf30	0.276784	0.287308	-0.0105244	0.0296693	0.0311703	-0.00150093	0.224332	0.236125	-0.0117924	0.0530496	0.0645158	-0.0114662	0.487803	0.47862	0.0091821	0.15493	0.537836	-0.382905	0	No	No	1
C22orf33	0.470636	0.699095	-0.228459	0.352663	0.50374	-0.151077	0.476376	0.723401	-0.247025	0.224091	0.568048	-0.343957	0.488495	0.749133	-0.260638	#N/A	#N/A	#N/A	0	No	No	4
C22orf34	0.187215	0.65609	-0.468875	0.277071	0.638767	-0.361696	#N/A	#N/A	#N/A	#N/A	#N/A	#N/A	0.265575	0.651416	-0.385841	#N/A	#N/A	#N/A	0	No	No	3
C22orf41	0.101318	0.060272	0.0410459	0.0257332	0.0303961	-0.00466294	0.386654	0.401391	-0.0147373	#N/A	#N/A	#N/A	0.759827	0.882823	-0.122997	0.598722	0.815151	-0.216429	0	No	No	1
C22orf42	0.443866	0.81135	-0.367484	0.274706	0.595023	-0.320317	#N/A	#N/A	#N/A	0.352395	0.813366	-0.460972	0.486494	0.893672	-0.407178	#N/A	#N/A	#N/A	0	No	No	4
C22orf43	0.582895	0.827216	-0.244321	0.80329	0.893921	-0.0906315	0.152838	0.582057	-0.429219	0.152838	0.582057	-0.429219	0.531831	0.90757	-0.375739	0.448141	0.778791	-0.330651	0	No	No	5
C2CD4B	0.724885	0.755798	-0.0309125	0.53774	0.2139	0.32384	0.159652	0.0896952	0.0699569	0.269085	0.120902	0.148183	0.142923	0.198832	-0.0559091	0.017602	0.0218611	-0.00425904	1	No	No	0
C2CD4D	0.463991	0.802446	-0.338455	#N/A	#N/A	#N/A	0.851301	0.213404	0.637897	0.740673	0.277116	0.463557	0.0535745	0.151305	-0.0977308	#N/A	#N/A	#N/A	2	No	No	1
C2orf14	#N/A	#N/A	#N/A	#N/A	#N/A	#N/A	#N/A	#N/A	#N/A	#N/A	#N/A	#N/A	0.206177	0.722447	-0.51627	#N/A	#N/A	#N/A	0	No	No	1
C2orf16	0.652154	0.775276	-0.123122	0.668278	0.882982	-0.214705	0.583501	0.861251	-0.277751	0.686035	0.801547	-0.115512	#N/A	#N/A	#N/A	0.688886	0.613683	0.0752031	0	No	No	2
C2orf27B	0.24495	0.34237	-0.0974201	0.397652	0.429639	-0.0319866	0.368003	0.538025	-0.170023	0.343363	0.495385	-0.152022	0.425032	0.734225	-0.309193	#N/A	#N/A	#N/A	0	No	No	1
C2orf28	0.0208278	0.022277	-0.00144916	0.0192291	0.0253913	-0.00616218	0.0413957	0.0565935	-0.0151978	0.0348138	0.0569744	-0.0221606	0.312212	0.338531	-0.0263188	0.165512	0.473878	-0.308366	0	No	No	1
C2orf42	0.774148	0.925458	-0.151309	0.029945	0.0356656	-0.00572058	0.0995864	0.128766	-0.0291796	0.00635098	0.0103402	-0.00398926	0.58546	0.917363	-0.331903	0.711097	0.720969	-0.00987203	0	No	No	1
C2orf51	0.25876	0.637685	-0.378926	0.496117	0.881403	-0.385286	0.376315	0.883488	-0.507173	0.45313	0.899642	-0.446512	0.507073	0.697209	-0.190136	#N/A	#N/A	#N/A	0	No	No	4
C2orf55	0.379922	0.165465	0.214456	0.0670673	0.0106559	0.0564114	0.260206	0.347871	-0.087664	0.0477374	0.00801023	0.0397272	0.484751	0.561309	-0.0765575	0.499563	0.666199	-0.166637	1	No	No	0
C2orf61	0.759521	0.845663	-0.0861416	0.891383	0.666601	0.224782	0.948619	0.722272	0.226347	0.948619	0.722272	0.226347	0.852129	0.849688	0.00244112	0.96612	0.944724	0.0213958	3	No	No	0
C2orf65	0.755414	0.52707	0.228343	0.642839	0.188423	0.454416	0.914533	0.942053	-0.0275201	#N/A	#N/A	#N/A	0.509012	0.588518	-0.0795065	0.838998	0.638873	0.200125	3	No	No	0
C2orf66	0.436152	0.725496	-0.289344	#N/A	#N/A	#N/A	0.39469	0.865049	-0.470359	0.39469	0.865049	-0.470359	0.466066	0.683325	-0.217258	0.944366	0.939892	0.00447403	0	No	No	4
C2orf71	0.598718	0.830554	-0.231835	#N/A	#N/A	#N/A	#N/A	#N/A	#N/A	0.817218	0.871942	-0.0547242	0.843084	0.753298	0.0897859	0.80042	0.727359	0.0730608	0	No	No	1
C2orf78	0.378597	0.763978	-0.385382	#N/A	#N/A	#N/A	#N/A	#N/A	#N/A	#N/A	#N/A	#N/A	0.504628	0.922078	-0.41745	#N/A	#N/A	#N/A	0	No	No	2
C2orf80	0.76077	0.706523	0.0542475	#N/A	#N/A	#N/A	0.862263	0.530722	0.331541	0.872408	0.593074	0.279335	0.336738	0.160863	0.175875	#N/A	#N/A	#N/A	2	No	No	0
C2orf82	0.849539	0.532353	0.317187	0.687124	0.679546	0.00757852	0.963785	0.947058	0.0167262	0.963785	0.947058	0.0167262	0.509796	0.520052	-0.0102566	0.0573365	0.00658222	0.0507543	1	No	No	0
C2orf83	0.563343	0.844722	-0.281379	#N/A	#N/A	#N/A	0.596541	0.906204	-0.309662	0.596541	0.906204	-0.309662	0.493045	0.95446	-0.461415	0.49483	0.923225	-0.428395	0	No	No	5
C2orf84	0.720795	0.868996	-0.148201	0.84038	0.483701	0.356679	0.98538	0.886539	0.0988409	#N/A	#N/A	#N/A	0.396082	0.825318	-0.429236	0.873341	0.855037	0.018304	1	No	No	1
C2orf85	0.190433	0.428034	-0.237601	0.68896	0.916551	-0.22759	#N/A	#N/A	#N/A	0.482534	0.673873	-0.191339	0.680132	0.783836	-0.103704	0.970452	0.978502	-0.0080508	0	No	No	2
C2orf88	0.326867	0.392341	-0.0654745	0.313538	0.340865	-0.0273269	0.299425	0.342324	-0.0428997	0.178327	0.195107	-0.0167799	0.928616	0.925797	0.00281873	0.632371	0.384316	0.248055	1	No	No	0
C2orf90	0.543642	0.830256	-0.286614	0.338441	0.549088	-0.210647	#N/A	#N/A	#N/A	0.604795	0.928574	-0.323779	#N/A	#N/A	#N/A	0.604795	0.928574	-0.323779	0	No	No	4
C3	0.254674	0.603807	-0.349133	#N/A	#N/A	#N/A	#N/A	#N/A	#N/A	#N/A	#N/A	#N/A	0.455959	0.771883	-0.315924	#N/A	#N/A	#N/A	0	No	No	2
C3AR1	0.499393	0.830988	-0.331596	0.181624	0.605855	-0.424232	0.45637	0.672554	-0.216184	0.04601	0.419384	-0.373374	0.617446	0.635304	-0.0178582	0.860993	0.672027	0.188966	0	No	No	4
C3orf16	0.746928	0.907956	-0.161028	#N/A	#N/A	#N/A	0.935581	0.909426	0.0261549	0.654348	0.862106	-0.207758	0.681982	0.687051	-0.0050686	#N/A	#N/A	#N/A	0	No	No	1
C3orf20	0.572707	0.560607	0.0120999	0.735415	0.76508	-0.0296649	0.759135	0.790236	-0.0311009	0.687425	0.798398	-0.110973	0.43313	0.663116	-0.229986	0.829463	0.934096	-0.104633	0	No	No	1
C3orf22	0.412289	0.840067	-0.427778	0.258666	0.593045	-0.334379	0.547683	0.754517	-0.206834	0.331535	0.611934	-0.280399	0.683911	0.796123	-0.112212	0.662921	0.843445	-0.180524	0	No	No	4
C3orf24	0.784191	0.765229	0.018962	0.884079	0.609834	0.274245	0.941202	0.769144	0.172057	0.94412	0.689027	0.255094	0.902195	0.856019	0.0461759	0.916094	0.934642	-0.0185483	2	No	No	0
C3orf27	0.44028	0.738788	-0.298508	0.344705	0.563607	-0.218903	0.54886	0.590088	-0.0412288	0.931028	0.791081	0.139947	0.63074	0.696937	-0.0661973	0.540276	0.579491	-0.0392155	0	No	No	2
C3orf30	0.515994	0.885546	-0.369552	0.484662	0.880537	-0.395875	0.324032	0.89616	-0.572128	0.547071	0.87046	-0.323389	0.492266	0.901477	-0.409211	#N/A	#N/A	#N/A	0	No	No	5
C3orf32	0.911952	0.905219	0.00673277	0.756743	0.776685	-0.0199417	0.719345	0.758817	-0.0394719	0.855123	0.871558	-0.0164348	0.514946	0.614459	-0.0995129	0.509157	0.791919	-0.282762	0	No	No	1
C3orf35	0.910758	0.896621	0.0141368	#N/A	#N/A	#N/A	0.681618	0.82475	-0.143132	0.431493	0.716055	-0.284562	0.940519	0.945442	-0.00492295	0.93279	0.943403	-0.0106133	0	No	No	1
C3orf43	0.656674	0.888319	-0.231645	0.607187	0.733007	-0.125819	0.8532	0.886815	-0.0336147	0.8532	0.886815	-0.0336147	0.295219	0.809304	-0.514085	0.32624	0.672008	-0.345769	0	No	No	3
C3orf51	0.554672	0.874852	-0.32018	#N/A	#N/A	#N/A	#N/A	#N/A	#N/A	#N/A	#N/A	#N/A	0.531344	0.758338	-0.226994	#N/A	#N/A	#N/A	0	No	No	2
C3orf62	0.183	0.0995959	0.0834039	0.0228256	0.025467	-0.00264135	0.0439229	0.0461833	-0.00226041	0.0680855	0.0753031	-0.00721766	0.73907	0.711637	0.027433	0.496567	0.710877	-0.21431	0	No	No	1
C3orf65	0.359989	0.834763	-0.474774	#N/A	#N/A	#N/A	#N/A	#N/A	#N/A	#N/A	#N/A	#N/A	0.612276	0.651153	-0.0388764	#N/A	#N/A	#N/A	0	No	No	1
C3orf66	0.391174	0.700163	-0.308989	0.399012	0.851414	-0.452402	#N/A	#N/A	#N/A	#N/A	#N/A	#N/A	0.448832	0.840087	-0.391255	#N/A	#N/A	#N/A	0	No	No	3
C3orf77	0.411419	0.884426	-0.473008	0.663772	0.958893	-0.29512	0.585439	0.915329	-0.32989	0.659221	0.895748	-0.236528	0.276827	0.79774	-0.520914	#N/A	#N/A	#N/A	0	No	No	5
C3orf79	0.747872	0.871676	-0.123803	0.372353	0.804165	-0.431812	#N/A	#N/A	#N/A	#N/A	#N/A	#N/A	#N/A	#N/A	#N/A	#N/A	#N/A	#N/A	0	No	No	1
C3P1	#N/A	#N/A	#N/A	0.204135	0.681564	-0.47743	#N/A	#N/A	#N/A	#N/A	#N/A	#N/A	0.220121	0.473079	-0.252958	#N/A	#N/A	#N/A	0	No	No	2
C4BPA	0.564584	0.895645	-0.331061	0.349214	0.775324	-0.42611	0.314763	0.699025	-0.384263	#N/A	#N/A	#N/A	0.670927	0.923712	-0.252785	#N/A	#N/A	#N/A	0	No	No	4
C4BPB	0.611926	0.836547	-0.224621	0.661004	0.816807	-0.155803	0.691562	0.803862	-0.1123	0.703601	0.797713	-0.0941119	0.449292	0.74117	-0.291878	#N/A	#N/A	#N/A	0	No	No	2
C4orf11	0.857584	0.927676	-0.0700919	#N/A	#N/A	#N/A	#N/A	#N/A	#N/A	#N/A	#N/A	#N/A	0.688379	0.917645	-0.229266	#N/A	#N/A	#N/A	0	No	No	1
C4orf17	0.629009	0.89964	-0.270631	#N/A	#N/A	#N/A	0.408586	0.700486	-0.2919	0.408586	0.700486	-0.2919	0.430316	0.772385	-0.342069	#N/A	#N/A	#N/A	0	No	No	4
C4orf26	0.527801	0.783401	-0.2556	0.210748	0.592337	-0.381589	0.331645	0.644352	-0.312707	0.502823	0.776503	-0.27368	0.533652	0.814524	-0.280872	#N/A	#N/A	#N/A	0	No	No	5
C4orf35	0.447384	0.862803	-0.41542	0.557548	0.942465	-0.384917	0.48549	0.900631	-0.415141	0.48549	0.900631	-0.415141	#N/A	#N/A	#N/A	#N/A	#N/A	#N/A	0	No	No	4
C4orf37	0.0430014	0.0606946	-0.0176932	0.0313788	0.0398025	-0.00842366	0.00770381	0.0123865	-0.00468265	0.00770381	0.0123865	-0.00468265	0.507407	0.770585	-0.263178	#N/A	#N/A	#N/A	0	No	No	1
C4orf39	0.541298	0.775552	-0.234253	0.022343	0.0394599	-0.017117	0.0058069	0.0166089	-0.010802	0.0518503	0.121973	-0.070123	#N/A	#N/A	#N/A	0.114746	0.329147	-0.2144	0	No	No	2
C4orf40	#N/A	#N/A	#N/A	#N/A	#N/A	#N/A	#N/A	#N/A	#N/A	#N/A	#N/A	#N/A	0.387372	0.804609	-0.417237	#N/A	#N/A	#N/A	0	No	No	1
C4orf42	0.0525552	0.0960662	-0.043511	0.250668	0.452623	-0.201955	0.807971	0.816055	-0.00808463	0.826185	0.842707	-0.0165216	#N/A	#N/A	#N/A	0.868271	0.889687	-0.0214161	0	No	No	1
C4orf45	0.378883	0.649143	-0.27026	#N/A	#N/A	#N/A	0.896556	0.85008	0.0464767	0.896556	0.85008	0.0464767	0.780745	0.813335	-0.0325902	#N/A	#N/A	#N/A	0	No	No	1
C4orf50	0.374986	0.673358	-0.298371	0.320771	0.689815	-0.369044	#N/A	#N/A	#N/A	#N/A	#N/A	#N/A	0.380103	0.602518	-0.222414	0.634322	0.880016	-0.245695	0	No	No	4
C4orf52	0.326543	0.332566	-0.00602354	0.0761718	0.094122	-0.0179502	0.00362793	0.00939012	-0.00576219	0.00530822	0.0116614	-0.00635314	0.472735	0.463172	0.00956302	0.580246	0.836779	-0.256533	0	No	No	1
C4orf6	0.408209	0.79103	-0.382821	0.266217	0.418119	-0.151902	#N/A	#N/A	#N/A	#N/A	#N/A	#N/A	0.732224	0.916629	-0.184405	0.313635	0.501144	-0.187509	0	No	No	1
C4orf7	#N/A	#N/A	#N/A	#N/A	#N/A	#N/A	0.455141	0.822387	-0.367247	0.455141	0.822387	-0.367247	#N/A	#N/A	#N/A	#N/A	#N/A	#N/A	0	No	No	2
C5AR1	0.225108	0.40478	-0.179672	0.130665	0.310215	-0.17955	0.124961	0.475392	-0.350432	0.124961	0.475392	-0.350432	0.753673	0.878702	-0.12503	0.714844	0.942287	-0.227443	0	No	No	3
C5orf23	0.720622	0.927186	-0.206563	#N/A	#N/A	#N/A	#N/A	#N/A	#N/A	#N/A	#N/A	#N/A	#N/A	#N/A	#N/A	#N/A	#N/A	#N/A	0	No	No	1
C5orf32	0.296361	0.0935593	0.202802	0.079298	0.061875	0.017423	0.378908	0.359814	0.0190934	0.0394105	0.0463644	-0.00695386	0.507066	0.523112	-0.0160461	0.876728	0.7832	0.0935282	1	No	No	0
C5orf39	0.183839	0.147134	0.0367043	0.287067	0.119338	0.167729	0.353634	0.273402	0.080232	0.341818	0.46845	-0.126631	#N/A	#N/A	#N/A	0.353751	0.782663	-0.428912	0	No	No	1
C5orf43	0.373434	0.381111	-0.00767707	0.0269564	0.038552	-0.0115956	0.258679	0.264785	-0.00610654	0.0527156	0.0668924	-0.0141769	0.435093	0.784812	-0.34972	0.915524	0.937188	-0.0216643	0	No	No	1
C5orf46	0.805834	0.898795	-0.0929612	#N/A	#N/A	#N/A	#N/A	#N/A	#N/A	#N/A	#N/A	#N/A	0.168072	0.314255	-0.146183	0.608511	0.88537	-0.27686	0	No	No	1
C5orf47	0.562489	0.728213	-0.165724	0.884492	0.9361	-0.0516086	#N/A	#N/A	#N/A	0.791487	0.931541	-0.140054	0.175217	0.794259	-0.619042	0.35154	0.798694	-0.447154	0	No	No	2
C5orf49	0.810333	0.826133	-0.0157998	0.240279	0.185575	0.0547039	0.0591832	0.0315842	0.027599	0.0342106	0.0225703	0.0116403	0.410948	0.398909	0.0120388	0.379925	0.656885	-0.27696	0	No	No	1
C5orf58	0.725235	0.931772	-0.206537	0.785042	0.917601	-0.132559	0.691268	0.892488	-0.201219	0.688299	0.909328	-0.22103	0.503125	0.909103	-0.405978	#N/A	#N/A	#N/A	0	No	No	4
C5orf60	0.625511	0.768181	-0.142669	#N/A	#N/A	#N/A	#N/A	#N/A	#N/A	0.57923	0.831587	-0.252356	0.624009	0.767363	-0.143354	0.223292	0.214753	0.00853887	0	No	No	1
C5orf62	0.747333	0.873006	-0.125673	0.542431	0.614034	-0.0716025	0.0257369	0.0306302	-0.00489325	0.0432783	0.0492238	-0.00594551	0.212619	0.416797	-0.204178	0.713798	0.750082	-0.0362841	0	No	No	1
C6	#N/A	#N/A	#N/A	#N/A	#N/A	#N/A	0.588467	0.807799	-0.219332	0.717924	0.898917	-0.180992	0.658757	0.930676	-0.271919	0.561308	0.87176	-0.310452	0	No	No	3
C6orf10	0.442766	0.922462	-0.479696	#N/A	#N/A	#N/A	0.315392	0.872627	-0.557235	0.315392	0.872627	-0.557235	0.469986	0.846296	-0.37631	#N/A	#N/A	#N/A	0	No	No	4
C6orf105	0.669813	0.788257	-0.118443	#N/A	#N/A	#N/A	0.706245	0.797226	-0.090981	0.706245	0.797226	-0.090981	0.613381	0.83724	-0.22386	0.400579	0.419301	-0.0187222	0	No	No	1
C6orf118	0.623252	0.909888	-0.286635	#N/A	#N/A	#N/A	#N/A	#N/A	#N/A	#N/A	#N/A	#N/A	0.395002	0.62819	-0.233188	#N/A	#N/A	#N/A	0	No	No	2
C6orf122	0.441608	0.629774	-0.188166	0.499883	0.823781	-0.323899	#N/A	#N/A	#N/A	#N/A	#N/A	#N/A	0.178049	0.206468	-0.0284184	#N/A	#N/A	#N/A	0	No	No	1
C6orf127	0.710648	0.839394	-0.128747	0.323842	0.638331	-0.314489	0.684566	0.860331	-0.175765	0.684566	0.860331	-0.175765	0.44826	0.484852	-0.0365925	#N/A	#N/A	#N/A	0	No	No	1
C6orf136	0.696313	0.578381	0.117932	0.0428815	0.0487216	-0.00584008	0.0296131	0.0528842	-0.0232711	0.0192526	0.0306544	-0.0114019	0.573293	0.552849	0.0204439	0.767203	0.450161	0.317042	1	No	No	0
C6orf138	0.110097	0.101467	0.00862953	0.178824	0.118178	0.0606461	0.0529086	0.0504773	0.00243134	0.121176	0.144748	-0.0235714	0.595717	0.833891	-0.238173	#N/A	#N/A	#N/A	0	No	No	1
C6orf142	0.429599	0.608615	-0.179015	0.533873	0.870725	-0.336852	0.581591	0.926321	-0.344731	0.577109	0.917125	-0.340017	0.400945	0.675821	-0.274876	0.768243	0.937601	-0.169359	0	No	No	4
C6orf146	0.621292	0.693143	-0.0718508	0.914554	0.834518	0.0800364	0.885755	0.725915	0.15984	0.85098	0.455845	0.395135	#N/A	#N/A	#N/A	#N/A	#N/A	#N/A	1	No	No	0
C6orf147	0.397509	0.597943	-0.200434	0.0412675	0.0405872	0.000680253	#N/A	#N/A	#N/A	#N/A	#N/A	#N/A	0.497373	0.498714	-0.00134079	#N/A	#N/A	#N/A	0	No	No	1
C6orf15	0.361314	0.675126	-0.313812	0.857203	0.864742	-0.0075396	#N/A	#N/A	#N/A	0.937104	0.909288	0.0278161	0.908835	0.907263	0.0015723	0.646323	0.799674	-0.153351	0	No	No	1
C6orf163	0.699732	0.840139	-0.140408	#N/A	#N/A	#N/A	0.211381	0.430081	-0.2187	0.517907	0.6765	-0.158593	0.92349	0.931479	-0.00798928	#N/A	#N/A	#N/A	0	No	No	1
C6orf165	0.0634554	0.0702436	-0.00678818	0.0405877	0.051581	-0.0109934	0.0463061	0.0556705	-0.00936442	0.0399026	0.0547224	-0.0148198	0.65621	0.864607	-0.208397	#N/A	#N/A	#N/A	0	No	No	1
C6orf168	0.118717	0.193502	-0.0747854	0.0772553	0.0796074	-0.00235204	0.0361616	0.0704163	-0.0342548	0.0636506	0.0863439	-0.0226932	0.630184	0.784005	-0.153821	0.548475	0.91129	-0.362815	0	No	No	1
C6orf191	0.526863	0.762202	-0.235339	0.3448	0.740658	-0.395858	0.262001	0.760017	-0.498016	0.262001	0.760017	-0.498016	0.596259	0.865919	-0.26966	#N/A	#N/A	#N/A	0	No	No	5
C6orf195	0.851668	0.852126	-0.000458207	0.53457	0.749792	-0.215222	0.431426	0.538236	-0.10681	0.032097	0.0246601	0.00743688	0.604487	0.660845	-0.0563583	0.876342	0.898579	-0.0222363	0	No	No	1
C6orf201	0.908939	0.905962	0.00297668	0.85098	0.455845	0.395135	0.790629	0.786998	0.00363157	0.797249	0.777968	0.0192815	0.747649	0.860381	-0.112733	0.895953	0.896507	-0.000554267	1	No	No	0
C6orf218	0.115384	0.168559	-0.0531753	#N/A	#N/A	#N/A	#N/A	#N/A	#N/A	#N/A	#N/A	#N/A	0.334482	0.626332	-0.29185	#N/A	#N/A	#N/A	0	No	No	1
C6orf227	0.818795	0.814788	0.00400658	0.783527	0.329285	0.454241	#N/A	#N/A	#N/A	#N/A	#N/A	#N/A	0.760628	0.594365	0.166263	#N/A	#N/A	#N/A	1	No	No	0
C6orf35	0.520563	0.726503	-0.20594	0.0569711	0.0567519	0.000219184	0.081957	0.129579	-0.0476216	0.081957	0.129579	-0.0476216	0.800123	0.76649	0.0336324	0.956227	0.910629	0.0455979	0	No	No	1
C6orf52	0.0330386	0.0469099	-0.0138713	0.0375713	0.0492998	-0.0117285	0.226115	0.226429	-0.000314165	0.00371988	0.00831379	-0.00459391	0.216675	0.253296	-0.0366204	0.624086	0.938531	-0.314445	0	No	No	1
C6orf58	0.695392	0.898256	-0.202864	0.229495	0.322853	-0.0933581	#N/A	#N/A	#N/A	#N/A	#N/A	#N/A	0.356855	0.695611	-0.338757	#N/A	#N/A	#N/A	0	No	No	2
C6orf62	0.0346951	0.0397953	-0.00510022	#N/A	#N/A	#N/A	0.227438	0.234263	-0.00682413	0.227438	0.234263	-0.00682413	0.288491	0.327117	-0.0386259	0.850464	0.60496	0.245504	1	No	No	0
C6orf89	0.756591	0.604192	0.152399	0.0394738	0.0443092	-0.00483542	0.0482918	0.0482283	6.36e-05	0.0482918	0.0482283	6.36e-05	0.465651	0.459807	0.0058444	0.870999	0.657402	0.213597	1	No	No	0
C6orf94	0.546921	0.589056	-0.0421352	#N/A	#N/A	#N/A	#N/A	#N/A	#N/A	#N/A	#N/A	#N/A	0.619132	0.673765	-0.0546335	0.446878	0.865572	-0.418694	0	No	No	1
C6orf97	0.0854474	0.0871563	-0.00170898	0.0748034	0.076252	-0.00144854	0.0114227	0.0193007	-0.00787804	0.0114227	0.0193007	-0.00787804	0.263849	0.345432	-0.0815833	0.500703	0.829218	-0.328515	0	Yes	No	1
C7	0.782852	0.817501	-0.034649	0.310678	0.257386	0.0532919	#N/A	#N/A	#N/A	#N/A	#N/A	#N/A	0.642718	0.847113	-0.204395	0.615286	0.871144	-0.255858	0	No	No	2
C7orf16	0.252209	0.794113	-0.541904	0.497423	0.659968	-0.162545	0.343923	0.559645	-0.215722	0.438023	0.397317	0.0407058	0.496024	0.834575	-0.338552	0.340797	0.845194	-0.504398	0	No	No	4
C7orf29	0.461898	0.70406	-0.242162	0.386844	0.52602	-0.139176	0.558101	0.486682	0.0714191	0.614632	0.636723	-0.0220908	#N/A	#N/A	#N/A	0.727696	0.936806	-0.209111	0	No	No	2
C7orf34	0.473305	0.836856	-0.363551	0.565395	0.866906	-0.30151	#N/A	#N/A	#N/A	0.182945	0.271073	-0.0881275	0.525931	0.84493	-0.318999	0.216691	0.244999	-0.0283079	0	No	No	3
C7orf4	0.193814	0.533987	-0.340173	#N/A	#N/A	#N/A	#N/A	#N/A	#N/A	#N/A	#N/A	#N/A	#N/A	#N/A	#N/A	#N/A	#N/A	#N/A	0	No	No	1
C7orf53	0.715252	0.859623	-0.144371	0.549135	0.75438	-0.205245	0.54172	0.614372	-0.0726521	0.620589	0.714967	-0.0943786	0.386173	0.186732	0.19944	0.943814	0.946275	-0.00246117	0	No	No	1
C7orf66	0.47512	0.908981	-0.43386	0.280525	0.831656	-0.551131	#N/A	#N/A	#N/A	#N/A	#N/A	#N/A	0.439764	0.925564	-0.4858	#N/A	#N/A	#N/A	0	No	No	3
C7orf71	0.587065	0.878954	-0.291889	0.483268	0.811197	-0.327929	0.722931	0.856426	-0.133495	0.911688	0.92617	-0.0144822	0.66971	0.885632	-0.215922	0.631618	0.827799	-0.196181	0	No	No	3
C7orf72	#N/A	#N/A	#N/A	#N/A	#N/A	#N/A	#N/A	#N/A	#N/A	0.167384	0.696122	-0.528738	0.286976	0.790143	-0.503167	0.556471	0.901613	-0.345142	0	No	No	3
C8orf12	0.342808	0.873628	-0.530821	0.330101	0.770235	-0.440134	#N/A	#N/A	#N/A	#N/A	#N/A	#N/A	0.212581	0.60945	-0.396869	#N/A	#N/A	#N/A	0	No	No	3
C8orf22	0.440893	0.730903	-0.29001	0.158367	0.347965	-0.189599	0.339367	0.831372	-0.492005	0.229623	0.790127	-0.560503	0.600491	0.828165	-0.227674	#N/A	#N/A	#N/A	0	No	No	4
C8orf34	0.517114	0.679718	-0.162604	#N/A	#N/A	#N/A	0.507263	0.788346	-0.281083	0.507263	0.788346	-0.281083	0.525659	0.64997	-0.124311	#N/A	#N/A	#N/A	0	No	No	2
C8orf42	0.270519	0.330961	-0.0604417	#N/A	#N/A	#N/A	0.0518004	0.0701772	-0.0183768	0.0341104	0.0503542	-0.0162438	0.523957	0.727894	-0.203938	0.761645	0.962944	-0.201299	0	No	No	2
C8orf44	0.217155	0.483838	-0.266683	#N/A	#N/A	#N/A	0.937124	0.917446	0.0196778	0.946573	0.926541	0.0200322	0.636086	0.619772	0.0163146	0.912829	0.906965	0.0058637	0	No	No	1
C8orf46	0.710371	0.848179	-0.137808	0.259355	0.37826	-0.118905	0.247392	0.613695	-0.366303	0.247392	0.613695	-0.366303	0.683095	0.666119	0.0169757	0.498207	0.34844	0.149767	0	No	No	2
C8orf55	0.0669996	0.0473322	0.0196674	0.0193603	0.0156873	0.003673	#N/A	#N/A	#N/A	0.0716984	0.028975	0.0427234	0.583799	0.654115	-0.0703162	0.529263	0.830394	-0.301131	0	No	No	1
C8orf56	0.554694	0.585283	-0.0305885	0.457991	0.244768	0.213223	#N/A	#N/A	#N/A	#N/A	#N/A	#N/A	0.374053	0.40944	-0.0353867	#N/A	#N/A	#N/A	1	No	No	0
C8orf71	0.622383	0.948693	-0.326309	0.520798	0.901089	-0.380291	#N/A	#N/A	#N/A	#N/A	#N/A	#N/A	0.524556	0.58978	-0.0652247	#N/A	#N/A	#N/A	0	No	No	2
C8orf74	0.705575	0.893304	-0.187729	0.24007	0.489641	-0.249571	0.188349	0.495878	-0.307529	0.188349	0.495878	-0.307529	0.605084	0.679864	-0.0747801	0.511625	0.877713	-0.366088	0	No	No	4
C8orf79	0.716898	0.890265	-0.173368	0.640022	0.878041	-0.238019	0.400439	0.552523	-0.152084	0.892121	0.928445	-0.0363246	0.657394	0.87185	-0.214456	0.704123	0.95133	-0.247208	0	No	No	3
C8ORFK29	0.811429	0.813333	-0.00190329	0.917549	0.812298	0.105251	#N/A	#N/A	#N/A	#N/A	#N/A	#N/A	0.753032	0.530743	0.222289	#N/A	#N/A	#N/A	1	No	No	0
C9	0.73796	0.859312	-0.121352	#N/A	#N/A	#N/A	#N/A	#N/A	#N/A	0.396326	0.461766	-0.0654399	0.71604	0.837226	-0.121186	0.355339	0.787625	-0.432286	0	No	No	1
C9orf106	0.353719	0.338401	0.0153177	0.0209339	0.0204447	0.000489173	0.255611	0.329015	-0.0734042	#N/A	#N/A	#N/A	#N/A	#N/A	#N/A	0.873862	0.638373	0.235489	1	No	No	0
C9orf109	0.046539	0.253987	-0.207448	0.057644	0.113114	-0.05547	#N/A	#N/A	#N/A	#N/A	#N/A	#N/A	#N/A	#N/A	#N/A	#N/A	#N/A	#N/A	0	No	No	1
C9orf110	0.057644	0.113114	-0.05547	0.046539	0.253987	-0.207448	#N/A	#N/A	#N/A	#N/A	#N/A	#N/A	#N/A	#N/A	#N/A	#N/A	#N/A	#N/A	0	No	No	1
C9orf125	0.562216	0.638693	-0.0764769	0.0692644	0.0677987	0.00146563	0.0591875	0.0669545	-0.00776701	#N/A	#N/A	#N/A	0.641073	0.857544	-0.21647	0.270583	0.768093	-0.497511	0	No	No	2
C9orf128	0.0399723	0.0529655	-0.0129932	#N/A	#N/A	#N/A	0.433021	0.683374	-0.250353	#N/A	#N/A	#N/A	#N/A	#N/A	#N/A	#N/A	#N/A	#N/A	0	No	No	1
C9orf144	0.471318	0.934194	-0.462876	0.438043	0.836735	-0.398692	#N/A	#N/A	#N/A	#N/A	#N/A	#N/A	0.373097	0.900875	-0.527779	#N/A	#N/A	#N/A	0	No	No	3
C9orf144B	#N/A	#N/A	#N/A	0.477426	0.841712	-0.364286	#N/A	#N/A	#N/A	0.67422	0.934268	-0.260048	0.529438	0.757231	-0.227794	#N/A	#N/A	#N/A	0	No	No	3
C9orf152	#N/A	#N/A	#N/A	0.681478	0.894281	-0.212803	0.784789	0.784361	0.0004278	0.784789	0.784361	0.0004278	0.803321	0.892438	-0.0891171	#N/A	#N/A	#N/A	0	No	No	1
C9orf153	0.957732	0.948207	0.0095249	0.896813	0.923261	-0.026448	0.804325	0.786496	0.0178296	#N/A	#N/A	#N/A	0.42617	0.863763	-0.437593	#N/A	#N/A	#N/A	0	No	No	1
C9orf167	0.428885	0.428092	0.000793299	0.265332	0.163088	0.102244	0.688953	0.252627	0.436326	#N/A	#N/A	#N/A	0.932309	0.819204	0.113105	0.8276	0.767203	0.0603973	1	No	No	0
C9orf169	0.0737893	0.0621225	0.0116668	0.690001	0.670652	0.0193489	0.514673	0.666591	-0.151918	#N/A	#N/A	#N/A	0.646261	0.849	-0.202739	0.410639	0.691199	-0.280559	0	No	No	2
C9orf173	0.379889	0.460176	-0.0802864	0.171163	0.432313	-0.26115	#N/A	#N/A	#N/A	#N/A	#N/A	#N/A	0.890395	0.86922	0.0211748	#N/A	#N/A	#N/A	0	No	No	1
C9orf27	0.603643	0.637449	-0.0338059	0.794425	0.846104	-0.0516791	#N/A	#N/A	#N/A	#N/A	#N/A	#N/A	0.457019	0.677644	-0.220625	#N/A	#N/A	#N/A	0	No	No	1
C9orf3	0.283114	0.53675	-0.253636	0.0129574	0.0234946	-0.0105372	0.296595	0.290396	0.00619869	#N/A	#N/A	#N/A	0.490473	0.468349	0.0221237	0.808882	0.78398	0.0249019	0	No	No	1
C9orf7	0.199653	0.250946	-0.0512924	#N/A	#N/A	#N/A	#N/A	#N/A	#N/A	0.0451298	0.050766	-0.00563613	0.562579	0.540994	0.0215845	0.638151	0.379366	0.258785	1	No	No	0
C9orf71	#N/A	#N/A	#N/A	0.475924	0.422032	0.0538922	#N/A	#N/A	#N/A	#N/A	#N/A	#N/A	0.491191	0.848498	-0.357307	#N/A	#N/A	#N/A	0	No	No	1
CA1	0.272424	0.78511	-0.512686	0.309334	0.725502	-0.416168	0.279285	0.861728	-0.582443	#N/A	#N/A	#N/A	0.236432	0.790447	-0.554015	#N/A	#N/A	#N/A	0	No	No	4
CA13	0.0439563	0.104793	-0.0608372	0.0568167	0.0557156	0.00110112	0.0340794	0.0370851	-0.00300571	0.0340794	0.0370851	-0.00300571	0.5112	0.664933	-0.153733	0.470273	0.835357	-0.365085	0	No	No	1
CA2	0.0478264	0.0833739	-0.0355476	0.0400846	0.0308093	0.0092753	0.105182	0.0348365	0.0703452	0.105182	0.0348365	0.0703452	0.295309	0.369008	-0.073699	0.450154	0.947254	-0.497099	0	No	No	1
CA3	0.204616	0.329844	-0.125228	0.0499552	0.0852687	-0.0353135	0.150254	0.135867	0.0143872	0.150254	0.135867	0.0143872	0.306291	0.658766	-0.352475	#N/A	#N/A	#N/A	0	Yes	No	1
CA5A	0.764035	0.785113	-0.0210774	#N/A	#N/A	#N/A	#N/A	#N/A	#N/A	0.5404	0.750998	-0.210598	0.491209	0.612111	-0.120902	0.621271	0.768606	-0.147335	0	No	No	1
CA5BP	0.128172	0.351763	-0.223591	0.0343514	0.0416176	-0.00726616	#N/A	#N/A	#N/A	#N/A	#N/A	#N/A	0.171036	0.177081	-0.0060451	#N/A	#N/A	#N/A	0	No	No	1
CA7	0.251936	0.332013	-0.080077	0.0622043	0.0437413	0.018463	0.158909	0.210719	-0.0518101	0.0540686	0.0384968	0.0155718	0.162386	0.192274	-0.0298882	0.582822	0.908295	-0.325473	0	No	No	1
CA8	0.128145	0.113931	0.0142143	0.0350974	0.0297131	0.00538426	0.0118788	0.0115944	0.00028439	0.0118788	0.0115944	0.00028439	0.235158	0.604802	-0.369644	0.184281	0.61869	-0.434409	0	No	No	2
CA9	#N/A	#N/A	#N/A	0.267963	0.402535	-0.134572	#N/A	#N/A	#N/A	0.373535	0.674196	-0.300661	0.447251	0.43339	0.0138611	#N/A	#N/A	#N/A	0	No	No	1
CAB39L	0.269115	0.330665	-0.0615493	0.0147964	0.024689	-0.00989258	0.331224	0.368056	-0.0368312	0.140398	0.13602	0.00437749	0.815067	0.735505	0.0795619	0.717352	0.465387	0.251964	1	No	No	0
CABLES1	0.563539	0.396277	0.167262	0.700655	0.497784	0.202871	#N/A	#N/A	#N/A	0.123266	0.0803011	0.042965	0.450337	0.417873	0.0324635	0.0947497	0.0826747	0.0120751	1	Yes	No	0
CABP1	0.119057	0.122124	-0.00306673	0.401117	0.500231	-0.0991147	0.1004	0.150302	-0.0499023	0.061418	0.0961968	-0.0347788	0.392172	0.444839	-0.0526672	0.479897	0.735925	-0.256027	0	No	No	1
CABP2	0.371175	0.624952	-0.253777	0.452615	0.762148	-0.309533	0.305141	0.485245	-0.180103	0.305141	0.485245	-0.180103	0.604924	0.813862	-0.208938	#N/A	#N/A	#N/A	0	No	No	3
CABP5	0.362955	0.773938	-0.410983	0.268453	0.765878	-0.497425	#N/A	#N/A	#N/A	0.363419	0.758071	-0.394651	0.464446	0.838409	-0.373963	0.174202	0.581025	-0.406823	0	No	No	5
CACHD1	0.0595981	0.0940832	-0.0344851	0.0612235	0.106761	-0.0455375	#N/A	#N/A	#N/A	0.0301321	0.0356178	-0.00548574	0.581425	0.560026	0.0213988	0.577918	0.80374	-0.225822	0	No	No	1
CACNA1B	0.344039	0.498261	-0.154223	#N/A	#N/A	#N/A	#N/A	#N/A	#N/A	0.349687	0.252771	0.0969157	0.382345	0.633614	-0.251268	0.1817	0.543066	-0.361366	0	No	No	2
CACNA1C	0.0916083	0.0650418	0.0265664	0.0177466	0.0237889	-0.00604223	0.0692261	0.07765	-0.00842393	0.0692261	0.07765	-0.00842393	0.7451	0.73059	0.0145102	0.826968	0.566867	0.260101	1	Yes	No	0
CACNA1D	0.0885277	0.0508318	0.0376959	0.119727	0.054434	0.0652927	0.0736002	0.0820687	-0.00846848	0.0770252	0.0811031	-0.00407788	0.565368	0.656142	-0.0907735	0.680705	0.909255	-0.228549	0	Yes	No	1
CACNA1E	0.0537004	0.0722734	-0.0185731	0.135038	0.214029	-0.0789911	0.167603	0.151805	0.0157978	0.192029	0.163553	0.0284767	0.514728	0.643053	-0.128325	0.493845	0.824106	-0.330261	0	Yes	No	1
CACNA1F	0.558802	0.558212	0.000589492	0.312812	0.573868	-0.261056	#N/A	#N/A	#N/A	#N/A	#N/A	#N/A	0.379805	0.621093	-0.241288	#N/A	#N/A	#N/A	0	No	No	2
CACNA1H	0.196189	0.19744	-0.0012501	#N/A	#N/A	#N/A	0.0440999	0.0632427	-0.0191429	0.0964764	0.146597	-0.0501206	0.456096	0.679271	-0.223174	0.473699	0.747147	-0.273448	0	No	No	2
CACNA1I	0.531952	0.845544	-0.313592	0.574424	0.789158	-0.214734	#N/A	#N/A	#N/A	0.609679	0.833508	-0.223829	0.361574	0.55027	-0.188697	0.742996	0.902263	-0.159266	0	No	No	3
CACNA2D4	0.639977	0.78264	-0.142663	0.339837	0.753283	-0.413446	0.258392	0.809475	-0.551083	0.258392	0.809475	-0.551083	0.490059	0.593728	-0.103669	0.765057	0.654048	0.11101	0	No	No	3
CACNG1	0.593204	0.838924	-0.245719	0.464216	0.701629	-0.237413	0.746823	0.892757	-0.145934	0.560568	0.846879	-0.286311	0.623109	0.823226	-0.200117	0.693833	0.867193	-0.173361	0	No	No	4
CACNG2	0.0268756	0.0450318	-0.0181562	0.0663186	0.117152	-0.0508336	0.258902	0.629472	-0.37057	0.258902	0.629472	-0.37057	0.412609	0.672513	-0.259904	#N/A	#N/A	#N/A	0	No	No	3
CACNG3	0.24845	0.820166	-0.571717	0.275535	0.467873	-0.192338	0.0795992	0.115456	-0.0358565	0.0795992	0.115456	-0.0358565	0.244147	0.805539	-0.561391	0.209213	0.654448	-0.445235	0	No	No	3
CACNG5	0.49054	0.85488	-0.36434	0.599158	0.798571	-0.199413	#N/A	#N/A	#N/A	0.526304	0.905165	-0.37886	0.659712	0.80208	-0.142368	#N/A	#N/A	#N/A	0	No	No	2
CACNG6	0.154547	0.153304	0.00124298	0.340061	0.609643	-0.269582	0.3656	0.641173	-0.275573	0.303105	0.485764	-0.182659	0.225364	0.435119	-0.209755	0.220431	0.521865	-0.301434	0	Yes	No	4
CACNG7	0.384483	0.706041	-0.321558	0.276597	0.454155	-0.177558	#N/A	#N/A	#N/A	0.675588	0.662587	0.0130013	0.434069	0.503728	-0.069659	0.285196	0.184663	0.100532	0	No	No	1
CAD	0.718783	0.807818	-0.0890351	0.0453944	0.051574	-0.00617962	0.0869994	0.155914	-0.0689146	0.0869994	0.155914	-0.0689146	0.335151	0.40947	-0.0743187	0.662138	0.45852	0.203618	1	No	No	0
CADM1	0.229157	0.238489	-0.00933261	0.0490462	0.0445563	0.00448992	0.0944353	0.0967909	-0.0023556	0.0662432	0.0662642	-2.10059e-05	0.54339	0.674006	-0.130617	0.708269	0.912691	-0.204422	0	No	No	1
CADM2	0.062858	0.0717684	-0.00891046	0.0671165	0.0754281	-0.00831155	0.0497427	0.0581462	-0.00840341	0.0864204	0.0834026	0.00301777	0.436769	0.693184	-0.256415	#N/A	#N/A	#N/A	0	No	No	1
CADM3	0.358855	0.665521	-0.306666	0.0603141	0.0702952	-0.0099812	0.00381651	0.0159602	-0.0121437	0.00381651	0.0159602	-0.0121437	0.234069	0.414749	-0.18068	0.458782	0.785655	-0.326874	0	No	No	2
CADPS	0.163426	0.134512	0.0289137	0.0386583	0.0905652	-0.051907	0.0752886	0.149545	-0.0742561	0.0752886	0.149545	-0.0742561	0.316607	0.603856	-0.287249	0.711877	0.931594	-0.219717	0	No	No	2
CAGE1	0.0268524	0.032922	-0.00606955	0.0452652	0.0609549	-0.0156897	0.176267	0.224392	-0.0481245	0.0388131	0.0537014	-0.0148883	0.620313	0.837639	-0.217327	0.42951	0.633057	-0.203546	0	No	No	2
CALB1	0.521673	0.905069	-0.383396	#N/A	#N/A	#N/A	0.0479443	0.0542222	-0.00627791	0.0552233	0.0685588	-0.0133354	0.146757	0.162042	-0.0152854	0.883305	0.947263	-0.0639585	0	No	No	1
CALB2	0.0743454	0.157491	-0.0831454	0.00733247	0.00460851	0.00272396	0.0142976	0.016403	-0.00210539	0.0266425	0.0338809	-0.00723841	0.221486	0.40318	-0.181694	0.290514	0.592903	-0.302389	0	No	No	1
CALCA	0.382958	0.170856	0.212102	0.589201	0.154845	0.434357	0.593562	0.120816	0.472746	0.693522	0.0870782	0.606444	0.312944	0.25604	0.0569044	#N/A	#N/A	#N/A	4	Yes	No	0
CALCB	0.646545	0.882064	-0.23552	0.128074	0.0842134	0.0438608	0.0962734	0.09002	0.00625335	0.162902	0.0565554	0.106346	0.276752	0.572575	-0.295824	0.448017	0.699921	-0.251904	0	No	No	3
CALCOCO2	0.683492	0.673689	0.00980242	0.210522	0.209576	0.000945317	0.21141	0.215185	-0.00377421	0.0125498	0.0263731	-0.0138233	0.764054	0.264213	0.499842	#N/A	#N/A	#N/A	1	No	No	0
CALCR	0.157454	0.180689	-0.0232351	0.225157	0.178023	0.0471341	0.340162	0.546762	-0.2066	#N/A	#N/A	#N/A	0.379458	0.883381	-0.503923	0.634261	0.931655	-0.297394	0	Yes	No	3
CALCRL	#N/A	#N/A	#N/A	#N/A	#N/A	#N/A	0.366873	0.59745	-0.230576	#N/A	#N/A	#N/A	0.621246	0.873826	-0.25258	0.719656	0.946306	-0.226651	0	No	No	3
CALHM3	0.501951	0.623286	-0.121335	0.393612	0.519891	-0.126278	0.592754	0.715592	-0.122838	0.76234	0.816709	-0.0543691	0.875616	0.665577	0.210039	0.858085	0.829516	0.0285689	1	No	No	0
CALML6	0.387569	0.653626	-0.266057	0.545898	0.650732	-0.104834	0.643531	0.798513	-0.154982	0.643531	0.798513	-0.154982	0.885971	0.881073	0.00489767	0.74859	0.750317	-0.0017271	0	No	No	1
CALN1	0.3111	0.396603	-0.0855031	0.705515	0.829788	-0.124273	0.411288	0.632448	-0.221159	0.475741	0.619183	-0.143442	0.371025	0.570573	-0.199548	0.29281	0.223944	0.0688666	0	No	No	1
CAMK1G	0.886077	0.866585	0.0194915	0.117629	0.123107	-0.00547739	0.0606941	0.0354043	0.0252897	#N/A	#N/A	#N/A	0.365795	0.744732	-0.378937	0.747723	0.93901	-0.191287	0	No	No	1
CAMK2A	0.716117	0.636729	0.0793876	0.843751	0.632837	0.210913	0.838304	0.660162	0.178142	0.838304	0.660162	0.178142	0.592381	0.606415	-0.014034	0.557292	0.624821	-0.0675288	1	No	No	0
CAMKV	0.393488	0.495543	-0.102056	0.0954944	0.126479	-0.0309849	0.14896	0.207746	-0.0587867	0.121899	0.108269	0.0136304	0.577668	0.800467	-0.222798	0.283833	0.628063	-0.34423	0	No	No	2
CAMTA1	0.0801847	0.0819883	-0.00180355	0.031406	0.0325375	-0.00113154	0.016453	0.0299612	-0.0135083	0.016453	0.0299612	-0.0135083	0.559626	0.663081	-0.103455	0.722973	0.956328	-0.233356	0	No	No	1
CAPN11	0.656622	0.749347	-0.0927255	0.89885	0.927388	-0.0285382	0.712767	0.754518	-0.0417512	0.712767	0.754518	-0.0417512	0.722669	0.90026	-0.177591	0.314766	0.74288	-0.428113	0	No	No	1
CAPN13	0.210199	0.740757	-0.530558	0.0885805	0.211537	-0.122956	0.16684	0.552134	-0.385294	0.184818	0.428086	-0.243267	0.291859	0.834271	-0.542412	#N/A	#N/A	#N/A	0	No	No	4
CAPN14	0.33234	0.760548	-0.428208	0.386636	0.842467	-0.455831	0.342251	0.845869	-0.503618	0.566826	0.925147	-0.358321	0.473016	0.887573	-0.414557	0.526905	0.893265	-0.36636	0	No	No	6
CAPN2	0.432042	0.54189	-0.109848	0.0855433	0.151945	-0.0664014	0.304286	0.584688	-0.280401	0.126379	0.231336	-0.104957	0.431002	0.423928	0.00707375	0.949273	0.948033	0.00124037	0	No	No	1
CAPN6	0.34598	0.56704	-0.22106	0.127446	0.26383	-0.136384	0.0672732	0.0971841	-0.0299109	#N/A	#N/A	#N/A	0.554935	0.784264	-0.229329	0.552904	0.826283	-0.273379	0	No	No	3
CAPN8	0.589123	0.793163	-0.20404	#N/A	#N/A	#N/A	#N/A	#N/A	#N/A	0.935493	0.928762	0.00673067	0.6732	0.699348	-0.0261482	0.573306	0.901457	-0.328151	0	No	No	2
CAPS2	0.169835	0.172704	-0.00286994	0.0292094	0.028531	0.000678401	0.0425503	0.048412	-0.00586179	0.0425503	0.048412	-0.00586179	0.707448	0.868997	-0.161549	0.55444	0.908374	-0.353934	0	No	No	1
CAPSL	0.296433	0.614823	-0.31839	#N/A	#N/A	#N/A	0.138402	0.298378	-0.159975	0.244935	0.49284	-0.247905	0.13414	0.409215	-0.275076	0.239922	0.860755	-0.620834	0	No	No	4
CAPZA3	0.55594	0.797639	-0.241699	0.653733	0.918644	-0.26491	#N/A	#N/A	#N/A	0.665237	0.903675	-0.238438	#N/A	#N/A	#N/A	#N/A	#N/A	#N/A	0	No	No	3
CARD11	0.461525	0.785277	-0.323752	0.207255	0.254574	-0.0473182	0.444508	0.693516	-0.249008	0.11638	0.0853176	0.0310621	0.597713	0.814823	-0.217111	0.807523	0.885072	-0.0775496	0	No	No	3
CARD16	0.579982	0.859326	-0.279344	0.250496	0.344981	-0.0944846	#N/A	#N/A	#N/A	0.136484	0.307642	-0.171158	0.51433	0.810712	-0.296383	0.637136	0.927116	-0.28998	0	No	No	3
CARD17	0.564414	0.825306	-0.260892	#N/A	#N/A	#N/A	#N/A	#N/A	#N/A	0.367183	0.648408	-0.281225	0.598134	0.835012	-0.236878	0.837582	0.905286	-0.0677034	0	No	No	3
CARD18	0.657498	0.897846	-0.240349	0.515689	0.846843	-0.331154	#N/A	#N/A	#N/A	#N/A	#N/A	#N/A	0.379522	0.701894	-0.322372	0.448335	0.71837	-0.270035	0	No	No	4
CARD6	#N/A	#N/A	#N/A	0.149166	0.432567	-0.2834	#N/A	#N/A	#N/A	0.0849626	0.362073	-0.277111	#N/A	#N/A	#N/A	0.594576	0.662506	-0.0679297	0	No	No	2
CARTPT	0.117112	0.341669	-0.224557	0.230715	0.180206	0.0505098	#N/A	#N/A	#N/A	0.212668	0.159748	0.0529195	0.295948	0.315287	-0.0193387	0.309115	0.806467	-0.497353	0	No	No	2
CASK	0.306432	0.405611	-0.0991793	0.109602	0.364155	-0.254553	#N/A	#N/A	#N/A	0.234775	0.47076	-0.235985	0.604504	0.696563	-0.0920594	0.901577	0.917117	-0.0155406	0	No	No	2
CASP1	0.564414	0.825306	-0.260892	#N/A	#N/A	#N/A	#N/A	#N/A	#N/A	0.367183	0.648408	-0.281225	0.461047	0.641245	-0.180197	0.576613	0.903967	-0.327354	0	No	No	3
CASP12	#N/A	#N/A	#N/A	0.172783	0.198916	-0.026133	#N/A	#N/A	#N/A	#N/A	#N/A	#N/A	0.492356	0.706787	-0.214431	#N/A	#N/A	#N/A	0	No	No	1
CASP14	0.138546	0.666012	-0.527466	0.148383	0.801894	-0.653512	#N/A	#N/A	#N/A	#N/A	#N/A	#N/A	0.322278	0.891846	-0.569568	#N/A	#N/A	#N/A	0	No	No	3
CASP4	0.551283	0.734872	-0.183589	0.0734763	0.129062	-0.055586	0.286811	0.472764	-0.185953	0.0446669	0.0432114	0.00145551	0.464058	0.676968	-0.212909	0.682156	0.89674	-0.214584	0	No	No	2
CASP5	0.514657	0.836478	-0.321821	#N/A	#N/A	#N/A	0.698748	0.822451	-0.123704	#N/A	#N/A	#N/A	0.641711	0.801897	-0.160185	0.452398	0.677041	-0.224643	0	No	No	2
CASR	0.42137	0.868494	-0.447124	0.276895	0.253018	0.0238771	0.336793	0.473168	-0.136376	0.311383	0.225217	0.0861654	0.337932	0.763829	-0.425897	0.447949	0.867159	-0.41921	0	No	No	3
CATSPER1	0.400115	0.715103	-0.314988	0.816563	0.89282	-0.0762568	0.146568	0.297291	-0.150722	0.689231	0.813243	-0.124012	0.313237	0.377168	-0.0639314	0.742476	0.811769	-0.0692931	0	No	No	1
CBFA2T3	0.129765	0.372026	-0.242261	0.0563441	0.280255	-0.223911	0.434596	0.686929	-0.252333	0.088616	0.243697	-0.155081	0.445991	0.718872	-0.272881	0.668568	0.879457	-0.210889	0	No	No	5
CBLC	0.896719	0.803651	0.0930676	0.268177	0.184972	0.0832041	0.5807	0.0548576	0.525842	0.530249	0.198436	0.331813	0.559837	0.596384	-0.0365471	0.0367362	0.0303589	0.00637724	2	No	No	0
CBLN2	0.192646	0.394015	-0.201369	0.0489049	0.0662263	-0.0173214	0.0733783	0.0589997	0.0143787	0.125314	0.0700998	0.0552139	0.421124	0.798114	-0.37699	0.390403	0.68562	-0.295216	0	Yes	No	3
CBLN4	0.402232	0.467038	-0.0648055	0.100275	0.112657	-0.0123816	0.161237	0.155533	0.00570374	0.113666	0.119255	-0.00558849	0.249863	0.374052	-0.124189	0.305707	0.695624	-0.389917	0	Yes	No	1
CBX1	0.0776226	0.152346	-0.0747237	0.0347258	0.0396453	-0.00491948	0.234295	0.24544	-0.0111443	0.0256223	0.0301633	-0.00454106	0.608929	0.894436	-0.285507	0.688798	0.751818	-0.0630204	0	No	No	1
CBX4	0.11108	0.137987	-0.0269074	0.0432377	0.054384	-0.0111463	#N/A	#N/A	#N/A	0	0.0166673	-0.0166673	0.422574	0.532395	-0.10982	0.712097	0.955181	-0.243084	0	Yes	No	1
CCBP2	0.673835	0.944327	-0.270492	0.505536	0.789444	-0.283908	0.5652	0.697423	-0.132224	0.748904	0.893163	-0.144259	0.827073	0.935648	-0.108576	0.556694	0.866108	-0.309414	0	No	No	3
CCDC103	0.0493928	0.0566225	-0.00722967	0.0579599	0.0731298	-0.0151698	0.0721141	0.095959	-0.0238448	#N/A	#N/A	#N/A	0.909658	0.886434	0.023224	0.865288	0.591887	0.273401	1	No	No	0
CCDC105	0.325552	0.564582	-0.23903	0.219329	0.196522	0.0228076	0.142706	0.0811127	0.0615933	0.0958827	0.0929015	0.00298113	0.306606	0.603727	-0.297121	0.179662	0.139284	0.0403777	0	No	No	2
CCDC108	0.327721	0.59189	-0.264168	0.0757403	0.0543171	0.0214232	0.0882671	0.181777	-0.09351	0.0394091	0.0513619	-0.0119528	0.461561	0.650466	-0.188906	0.0735283	0.238014	-0.164486	0	No	No	1
CCDC109A	0.0712678	0.200897	-0.129629	0.0561867	0.0812058	-0.0250191	#N/A	#N/A	#N/A	0.00341551	0.00107142	0.0023441	0.476197	0.442064	0.0341322	0.750516	0.439978	0.310538	1	No	No	0
CCDC11	0.609329	0.650618	-0.0412899	0.0177894	0.0305142	-0.0127249	0.0257705	0.0319114	-0.00614093	0.0636846	0.0698581	-0.00617349	0.489888	0.657893	-0.168005	0.396596	0.943378	-0.546782	0	No	No	1
CCDC113	0.555733	0.785872	-0.230139	0.0263534	0.0360832	-0.00972973	0.155865	0.220499	-0.0646341	0.155865	0.220499	-0.0646341	0.280497	0.394824	-0.114327	0.285443	0.725713	-0.44027	0	No	No	2
CCDC129	0.29217	0.88133	-0.58916	#N/A	#N/A	#N/A	0.408731	0.795777	-0.387046	0.408731	0.795777	-0.387046	0.238843	0.655239	-0.416397	0.321408	0.840013	-0.518605	0	No	No	5
CCDC13	0.532126	0.548822	-0.0166959	0.0209729	0.0275725	-0.00659961	0.498894	0.564364	-0.0654701	0.107201	0.163504	-0.0563029	0.513035	0.613756	-0.100721	0.563956	0.858059	-0.294102	0	No	No	1
CCDC140	0.437206	0.219936	0.21727	0.690965	0.432418	0.258548	0.507764	0.174028	0.333736	0.752995	0.267072	0.485923	0.429688	0.140098	0.289589	0.447744	0.247259	0.200485	6	No	No	0
CCDC141	0.48572	0.637679	-0.151959	0.778278	0.910122	-0.131844	0.806178	0.930463	-0.124284	0.872219	0.927024	-0.0548048	0.567732	0.796271	-0.228539	#N/A	#N/A	#N/A	0	No	No	1
CCDC144A	0.571584	0.575896	-0.00431124	0.337385	0.457594	-0.120209	#N/A	#N/A	#N/A	0.444732	0.686309	-0.241576	0.617812	0.775978	-0.158166	#N/A	#N/A	#N/A	0	No	No	1
CCDC144B	0.418528	0.440589	-0.022061	#N/A	#N/A	#N/A	#N/A	#N/A	#N/A	0.573398	0.713041	-0.139644	0.452286	0.843984	-0.391698	#N/A	#N/A	#N/A	0	No	No	1
CCDC144NL	0.650186	0.545001	0.105185	0.754473	0.573753	0.18072	0.635951	0.68195	-0.0459992	0.668997	0.726614	-0.0576163	0.765554	0.860399	-0.0948455	0.44519	0.66979	-0.2246	0	No	No	1
CCDC147	0.235747	0.22718	0.00856773	0.0593549	0.0692725	-0.00991759	0.0833843	0.0506586	0.0327258	0.0833843	0.0506586	0.0327258	0.270557	0.532722	-0.262166	#N/A	#N/A	#N/A	0	No	No	1
CCDC150	0.240244	0.494445	-0.254201	0.0324971	0.074469	-0.0419719	0.0329304	0.0565626	-0.0236322	0.0329304	0.0565626	-0.0236322	0.596657	0.63235	-0.035693	0.861259	0.867001	-0.00574207	0	No	No	1
CCDC154	0.722313	0.788038	-0.0657253	0.693791	0.78971	-0.0959195	#N/A	#N/A	#N/A	#N/A	#N/A	#N/A	0.735739	0.799249	-0.0635091	0.213749	0.450956	-0.237208	0	No	No	1
CCDC155	0.644446	0.711715	-0.0672695	0.428844	0.605317	-0.176473	0.405448	0.698271	-0.292823	0.296304	0.762073	-0.46577	0.406579	0.726232	-0.319653	0.455319	0.562161	-0.106842	0	No	No	3
CCDC160	0.398861	0.591287	-0.192427	0.262105	0.446917	-0.184812	0.295477	0.502078	-0.2066	0.380235	0.529721	-0.149486	0.646698	0.802021	-0.155323	#N/A	#N/A	#N/A	0	No	No	1
CCDC162	0.64915	0.874265	-0.225114	0.663561	0.843388	-0.179827	#N/A	#N/A	#N/A	#N/A	#N/A	#N/A	0.8547	0.916575	-0.0618749	#N/A	#N/A	#N/A	0	No	No	1
CCDC17	0.74179	0.672852	0.0689376	0.412793	0.261566	0.151226	0.845254	0.702625	0.142629	0.845254	0.702625	0.142629	0.817127	0.589203	0.227924	#N/A	#N/A	#N/A	1	No	No	0
CCDC22	0.558802	0.558212	0.000589492	0.315736	0.493076	-0.17734	0.0760489	0.31164	-0.235591	0.0760489	0.31164	-0.235591	0.403374	0.558231	-0.154857	0.778307	0.89626	-0.117953	0	No	No	2
CCDC27	0.269822	0.449934	-0.180112	0.530387	0.856273	-0.325886	#N/A	#N/A	#N/A	0.641543	0.933787	-0.292245	0.383272	0.724597	-0.341325	0.35444	0.545187	-0.190748	0	No	No	3
CCDC30	0.435233	0.84191	-0.406677	#N/A	#N/A	#N/A	0.69852	0.885571	-0.187051	#N/A	#N/A	#N/A	0.841863	0.946958	-0.105094	0.704948	0.863989	-0.159042	0	No	No	1
CCDC33	0.53565	0.633588	-0.0979373	0.797525	0.757792	0.0397328	0.821866	0.821945	-7.89e-05	0.821866	0.821945	-7.89e-05	0.471558	0.517245	-0.0456871	0.615074	0.833304	-0.218229	0	No	No	1
CCDC48	0.0835176	0.0978641	-0.0143464	0.0762995	0.0680396	0.00825989	#N/A	#N/A	#N/A	0.239572	0.0132772	0.226295	0.508114	0.588536	-0.0804215	0.5903	0.714121	-0.123821	1	No	No	0
CCDC52	0.137333	0.500599	-0.363266	0.021907	0.0242637	-0.00235669	0.185387	0.222368	-0.0369805	0.0660921	0.0762586	-0.0101665	0.676396	0.766188	-0.0897922	0.939782	0.928273	0.0115094	0	No	No	1
CCDC54	0.909788	0.929302	-0.0195143	#N/A	#N/A	#N/A	#N/A	#N/A	#N/A	0.278252	0.790149	-0.511898	#N/A	#N/A	#N/A	#N/A	#N/A	#N/A	0	No	No	1
CCDC56	0.702994	0.916681	-0.213688	0.0353296	0.0426499	-0.00732028	#N/A	#N/A	#N/A	0.0374622	0.052551	-0.0150888	0.254753	0.249383	0.00536948	0.790002	0.70277	0.0872322	0	No	No	1
CCDC60	0.332872	0.825777	-0.492905	0.178883	0.177346	0.00153717	0.465664	0.418841	0.0468228	0.465664	0.418841	0.0468228	0.504571	0.826355	-0.321784	#N/A	#N/A	#N/A	0	No	No	2
CCDC63	0.621954	0.406852	0.215101	0.0296475	0.0369442	-0.00729674	0.313528	0.319558	-0.00603033	0.016558	0.0279772	-0.0114192	0.222146	0.364476	-0.14233	0.341962	0.635538	-0.293577	1	No	No	1
CCDC64B	0.0917051	0.150233	-0.058528	0.342631	0.408118	-0.0654868	0.140802	0.436026	-0.295224	0.219153	0.525459	-0.306305	0.419792	0.383527	0.036265	0.892546	0.895424	-0.0028778	0	No	No	2
CCDC65	0.442812	0.708702	-0.265891	0.0370883	0.0513608	-0.0142725	0.0552093	0.0589607	-0.00375136	0.0552093	0.0589607	-0.00375136	0.807364	0.877205	-0.0698413	#N/A	#N/A	#N/A	0	No	No	1
CCDC68	0.594885	0.468675	0.12621	0.42094	0.32706	0.0938801	0.405094	0.322682	0.0824113	0.510145	0.0846071	0.425538	0.596256	0.878941	-0.282685	#N/A	#N/A	#N/A	1	No	No	1
CCDC70	0.603479	0.914393	-0.310914	0.467542	0.815551	-0.348009	0.389496	0.602642	-0.213146	0.576611	0.863005	-0.286394	0.900363	0.9271	-0.0267371	#N/A	#N/A	#N/A	0	No	No	4
CCDC73	0.661133	0.748665	-0.0875314	0.726895	0.897033	-0.170139	0.618705	0.9133	-0.294594	#N/A	#N/A	#N/A	0.894013	0.927644	-0.0336314	#N/A	#N/A	#N/A	0	No	No	1
CCDC78	0.0481894	0.0691308	-0.0209414	0.153384	0.167987	-0.014603	0.161922	0.184891	-0.0229689	0.161922	0.184891	-0.0229689	0.539498	0.772976	-0.233478	0.756079	0.744827	0.0112516	0	No	No	1
CCDC79	0.922751	0.905626	0.0171251	0.974682	0.924932	0.0497498	0.948893	0.927726	0.0211665	0.959943	0.914656	0.0452875	0.593565	0.812655	-0.21909	#N/A	#N/A	#N/A	0	No	No	1
CCDC8	0.949518	0.874562	0.0749562	0.47771	0.0813322	0.396378	0.475994	0.0776122	0.398381	0.601063	0.315646	0.285417	#N/A	#N/A	#N/A	0.848434	0.715421	0.133013	3	No	No	0
CCDC80	0.505688	0.550688	-0.0449998	#N/A	#N/A	#N/A	0.0954995	0.105349	-0.00984928	0.0954995	0.105349	-0.00984928	0.687186	0.622015	0.0651708	0.419857	0.16591	0.253947	1	No	No	0
CCDC90B	0.417947	0.723477	-0.30553	0.0343771	0.0484867	-0.0141096	0.0525629	0.0623579	-0.00979506	0.0525629	0.0623579	-0.00979506	0.327329	0.332483	-0.00515429	0.884212	0.853633	0.0305791	0	No	No	1
CCL1	0.10079	0.606541	-0.505751	0.156699	0.51623	-0.359531	#N/A	#N/A	#N/A	0.26492	0.843719	-0.578799	0.378632	0.315487	0.063145	#N/A	#N/A	#N/A	0	No	No	3
CCL11	0.335918	0.736855	-0.400938	0.269314	0.435942	-0.166628	0.213926	0.763697	-0.549771	0.213926	0.763697	-0.549771	0.162945	0.773275	-0.610329	#N/A	#N/A	#N/A	0	No	No	4
CCL13	0.263416	0.862172	-0.598756	0.251049	0.788133	-0.537084	0.307438	0.813658	-0.50622	0.307438	0.813658	-0.50622	#N/A	#N/A	#N/A	0.512309	0.774332	-0.262023	0	No	No	5
CCL14	0.334082	0.766056	-0.431974	#N/A	#N/A	#N/A	#N/A	#N/A	#N/A	0.39078	0.663614	-0.272834	0.180598	0.581223	-0.400625	#N/A	#N/A	#N/A	0	No	No	3
CCL14-CCL15	0.201034	0.636684	-0.43565	0.372909	0.549456	-0.176548	#N/A	#N/A	#N/A	#N/A	#N/A	#N/A	0.322332	0.653344	-0.331012	#N/A	#N/A	#N/A	0	No	No	2
CCL15	0.201034	0.636684	-0.43565	0.372909	0.549456	-0.176548	0.273816	0.475128	-0.201312	0.273816	0.475128	-0.201312	0.389867	0.693418	-0.303552	#N/A	#N/A	#N/A	0	No	No	4
CCL16	0.476928	0.736423	-0.259495	0.505934	0.763607	-0.257673	0.426952	0.782053	-0.355101	0.426952	0.782053	-0.355101	0.454044	0.799788	-0.345743	0.383329	0.870512	-0.487184	0	No	No	6
CCL17	0.648393	0.791299	-0.142906	0.523216	0.809281	-0.286065	0.663713	0.816015	-0.152302	0.722046	0.883656	-0.16161	0.679328	0.698059	-0.0187313	#N/A	#N/A	#N/A	0	No	No	1
CCL18	0.510549	0.886657	-0.376108	0.139983	0.421524	-0.281541	#N/A	#N/A	#N/A	0.230357	0.708854	-0.478496	0.24763	0.910403	-0.662773	#N/A	#N/A	#N/A	0	No	No	4
CCL20	0.412197	0.899526	-0.48733	0.365752	0.764124	-0.398371	#N/A	#N/A	#N/A	0.739462	0.876804	-0.137342	0.832931	0.909265	-0.0763346	#N/A	#N/A	#N/A	0	No	No	2
CCL22	0.695571	0.785139	-0.0895685	0.517136	0.698667	-0.181531	#N/A	#N/A	#N/A	0.619929	0.838396	-0.218467	0.990197	0.985348	0.00484947	#N/A	#N/A	#N/A	0	No	No	1
CCL23	0.29601	0.832234	-0.536223	0.0699714	0.558568	-0.488596	0.0652237	0.46425	-0.399026	0.0652237	0.46425	-0.399026	0.159025	0.756681	-0.597656	#N/A	#N/A	#N/A	0	No	No	5
CCL25	0.698393	0.806691	-0.108298	0.460697	0.622928	-0.162231	#N/A	#N/A	#N/A	0.825421	0.848268	-0.0228463	0.721695	0.796829	-0.075134	0.622754	0.914623	-0.291869	0	No	No	1
CCL26	0.497257	0.333681	0.163576	0.544808	0.425087	0.119721	0.226048	0.738418	-0.51237	#N/A	#N/A	#N/A	0.836331	0.86524	-0.0289085	0.513526	0.6448	-0.131274	0	No	No	1
CCL3	#N/A	#N/A	#N/A	0.0873917	0.571012	-0.48362	0.13654	0.580091	-0.443551	0.13654	0.580091	-0.443551	0.0910174	0.524409	-0.433391	0.105539	0.332907	-0.227368	0	No	No	5
CCL3L1	0.426682	0.710043	-0.283361	#N/A	#N/A	#N/A	#N/A	#N/A	#N/A	#N/A	#N/A	#N/A	#N/A	#N/A	#N/A	#N/A	#N/A	#N/A	0	No	No	1
CCL3L3	0.426682	0.710043	-0.283361	#N/A	#N/A	#N/A	#N/A	#N/A	#N/A	#N/A	#N/A	#N/A	#N/A	#N/A	#N/A	#N/A	#N/A	#N/A	0	No	No	1
CCL4	0.244085	0.77062	-0.526535	#N/A	#N/A	#N/A	#N/A	#N/A	#N/A	#N/A	#N/A	#N/A	0.602841	0.822561	-0.21972	0.25047	0.869538	-0.619068	0	No	No	3
CCL4L1	0.211352	0.861629	-0.650276	#N/A	#N/A	#N/A	#N/A	#N/A	#N/A	#N/A	#N/A	#N/A	0.178602	0.61946	-0.440858	#N/A	#N/A	#N/A	0	No	No	2
CCL4L2	0.211352	0.861629	-0.650276	#N/A	#N/A	#N/A	#N/A	#N/A	#N/A	#N/A	#N/A	#N/A	0.178602	0.61946	-0.440858	#N/A	#N/A	#N/A	0	No	No	2
CCL5	0.631418	0.80417	-0.172752	0.215145	0.571597	-0.356452	0.322196	0.579108	-0.256912	0.322196	0.579108	-0.256912	0.448508	0.601108	-0.1526	0.4277	0.514344	-0.0866441	0	No	No	3
CCL7	0.450405	0.87448	-0.424075	#N/A	#N/A	#N/A	#N/A	#N/A	#N/A	#N/A	#N/A	#N/A	0.66871	0.927412	-0.258701	#N/A	#N/A	#N/A	0	No	No	2
CCL8	0.4695	0.833437	-0.363937	0.0995468	0.536487	-0.436941	0.0835688	0.431292	-0.347723	0.0835688	0.431292	-0.347723	0.632242	0.897067	-0.264825	#N/A	#N/A	#N/A	0	No	No	5
CCNB3	0.362301	0.64131	-0.27901	#N/A	#N/A	#N/A	0.335109	0.650043	-0.314934	#N/A	#N/A	#N/A	0.545062	0.637453	-0.0923914	0.50146	0.822721	-0.321261	0	No	No	3
CCND2	0.0472974	0.0572217	-0.00992434	0.06998	0.0778991	-0.0079191	0.0397748	0.0562345	-0.0164598	0.0422412	0.0539109	-0.0116696	0.319401	0.407575	-0.0881741	0.489289	0.783337	-0.294047	0	No	No	1
CCNI2	0.198361	0.183308	0.0150531	0.0701657	0.0583952	0.0117706	0.168916	0.178357	-0.009441	0.462449	0.25879	0.203659	0.839358	0.624794	0.214564	0.584278	0.505933	0.0783447	2	No	No	0
CCNJ	0.12424	0.167899	-0.0436588	0.0841858	0.113318	-0.0291326	0.0179056	0.0248529	-0.00694734	0.00299721	0.00646628	-0.00346908	0.496516	0.504643	-0.00812663	0.612916	0.84025	-0.227334	0	No	No	1
CCR2	0.38409	0.741872	-0.357782	0.618048	0.885722	-0.267674	0.114707	0.436341	-0.321634	0.114707	0.436341	-0.321634	0.518064	0.730388	-0.212323	0.213265	0.45571	-0.242445	0	No	No	6
CCR3	0.407249	0.829754	-0.422505	#N/A	#N/A	#N/A	0.740632	0.884341	-0.143709	0.757632	0.855819	-0.0981863	0.808563	0.918975	-0.110412	0.660713	0.872066	-0.211353	0	No	No	2
CCR4	0.713649	0.901764	-0.188115	0.301817	0.478254	-0.176437	0.79409	0.824651	-0.0305616	0.79409	0.824651	-0.0305616	0.652605	0.916443	-0.263838	0.733917	0.924448	-0.190531	0	No	No	1
CCR5	0.519379	0.761451	-0.242072	0.61196	0.748432	-0.136472	0.510963	0.791596	-0.280633	#N/A	#N/A	#N/A	0.600452	0.777629	-0.177177	#N/A	#N/A	#N/A	0	No	No	2
CCR6	0.473955	0.700207	-0.226251	0.516277	0.888025	-0.371748	0.456608	0.74459	-0.287982	0.345445	0.677367	-0.331921	0.684745	0.947267	-0.262522	0.369318	0.910616	-0.541298	0	No	No	6
CCR8	0.473135	0.872656	-0.399521	0.25838	0.507363	-0.248984	0.55976	0.846922	-0.287162	#N/A	#N/A	#N/A	0.157024	0.806248	-0.649224	#N/A	#N/A	#N/A	0	No	No	4
CCRL2	0.283563	0.430801	-0.147238	0.212729	0.306826	-0.0940969	0.158155	0.291204	-0.133049	0.115436	0.233926	-0.11849	0.385704	0.608516	-0.222812	0.771658	0.816286	-0.0446281	0	No	No	1
CCT8L2	0.319555	0.749104	-0.429549	0.313039	0.725355	-0.412316	0.152821	0.59845	-0.445628	0.152821	0.59845	-0.445628	#N/A	#N/A	#N/A	#N/A	#N/A	#N/A	0	No	No	4
CD101	0.864479	0.739111	0.125368	0.870735	0.914529	-0.0437941	0.681687	0.833626	-0.151939	0.681687	0.833626	-0.151939	0.49774	0.83805	-0.340311	0.865469	0.931217	-0.0657478	0	No	No	1
CD109	0.25779	0.511006	-0.253216	0.0460583	0.067067	-0.0210087	0.0235223	0.0336308	-0.0101085	0.0235223	0.0336308	-0.0101085	0.425436	0.503316	-0.0778798	#N/A	#N/A	#N/A	0	No	No	1
CD14	0.863248	0.86187	0.0013773	#N/A	#N/A	#N/A	0.0837884	0.193514	-0.109725	0.0837884	0.193514	-0.109725	0.372647	0.1282	0.244446	0.619364	0.401662	0.217702	2	No	No	0
CD151	0.570012	0.691279	-0.121267	0.0446534	0.0434248	0.00122868	0.210967	0.164413	0.046554	#N/A	#N/A	#N/A	0.899188	0.826178	0.0730106	0.827298	0.564269	0.263029	1	No	No	0
CD160	0.719998	0.737909	-0.0179103	0.756201	0.837565	-0.0813639	0.396496	0.447323	-0.0508278	#N/A	#N/A	#N/A	0.11945	0.374318	-0.254868	#N/A	#N/A	#N/A	0	No	No	1
CD163	0.604698	0.915566	-0.310867	#N/A	#N/A	#N/A	#N/A	#N/A	#N/A	#N/A	#N/A	#N/A	0.261136	0.711831	-0.450696	#N/A	#N/A	#N/A	0	No	No	2
CD163L1	#N/A	#N/A	#N/A	#N/A	#N/A	#N/A	#N/A	#N/A	#N/A	0.212852	0.648719	-0.435868	0.306324	0.45482	-0.148496	#N/A	#N/A	#N/A	0	No	No	1
CD164L2	0.830095	0.844104	-0.0140088	0.0891401	0.0301442	0.0589959	0.508201	0.1148	0.393401	0.528068	0.190239	0.337829	0.583705	0.558639	0.0250661	0.899576	0.880046	0.0195305	2	No	No	0
CD177	0.264702	0.833146	-0.568443	0.355884	0.755465	-0.399582	0.119511	0.23666	-0.117148	0.116149	0.21638	-0.100231	0.460917	0.40252	0.0583964	0.160178	0.228579	-0.0684012	0	No	No	2
CD180	0.888965	0.919806	-0.0308413	0.159969	0.446643	-0.286674	#N/A	#N/A	#N/A	0.576291	0.839353	-0.263062	0.850259	0.887058	-0.0367991	0.164388	0.0859011	0.078487	0	No	No	2
CD1A	0.441013	0.899696	-0.458682	0.337055	0.797101	-0.460046	0.3005	0.67498	-0.37448	0.3005	0.67498	-0.37448	0.499355	0.957718	-0.458363	#N/A	#N/A	#N/A	0	No	No	5
CD1B	0.0708023	0.205019	-0.134217	0.235243	0.806682	-0.571439	#N/A	#N/A	#N/A	#N/A	#N/A	#N/A	0.204164	0.828383	-0.62422	#N/A	#N/A	#N/A	0	No	No	2
CD1C	0.112904	0.728345	-0.615441	#N/A	#N/A	#N/A	#N/A	#N/A	#N/A	0.243466	0.777777	-0.534311	0.285741	0.866365	-0.580624	#N/A	#N/A	#N/A	0	No	No	3
CD1D	0.264804	0.614631	-0.349827	0.711695	0.906967	-0.195273	0.145107	0.234934	-0.0898275	#N/A	#N/A	#N/A	0.169364	0.343167	-0.173803	0.205737	0.83857	-0.632832	0	Yes	No	2
CD1E	0.225923	0.907762	-0.681839	0.0295842	0.0713129	-0.0417287	#N/A	#N/A	#N/A	#N/A	#N/A	#N/A	0.151646	0.749646	-0.598	#N/A	#N/A	#N/A	0	No	No	2
CD200	#N/A	#N/A	#N/A	0.316178	0.0434099	0.272768	0.281122	0.00946479	0.271658	0.281122	0.00946479	0.271658	0.54239	0.500832	0.0415575	#N/A	#N/A	#N/A	3	No	No	0
CD200R1	0.897989	0.917991	-0.0200019	0.295971	0.644996	-0.349024	0.512966	0.668058	-0.155092	0.512966	0.668058	-0.155092	0.650554	0.873685	-0.223131	0.592722	0.853305	-0.260583	0	No	No	3
CD200R1L	0.574693	0.889449	-0.314756	#N/A	#N/A	#N/A	#N/A	#N/A	#N/A	#N/A	#N/A	#N/A	0.789222	0.8882	-0.0989776	#N/A	#N/A	#N/A	0	No	No	1
CD207	0.427182	0.781053	-0.353872	#N/A	#N/A	#N/A	#N/A	#N/A	#N/A	#N/A	#N/A	#N/A	0.584637	0.703326	-0.118689	0.332911	0.615303	-0.282392	0	No	No	2
CD209	0.177092	0.452845	-0.275753	#N/A	#N/A	#N/A	#N/A	#N/A	#N/A	#N/A	#N/A	#N/A	0.238677	0.582064	-0.343387	0.487548	0.799378	-0.311829	0	No	No	3
CD22	0.525373	0.829816	-0.304443	0.461917	0.758099	-0.296182	0.611356	0.793929	-0.182573	#N/A	#N/A	#N/A	0.701779	0.819085	-0.117305	0.315918	0.754367	-0.438449	0	No	No	3
CD226	0.574034	0.859479	-0.285445	0.273848	0.774799	-0.500952	0.3865	0.483429	-0.0969285	0.149482	0.321586	-0.172103	0.747147	0.922923	-0.175775	#N/A	#N/A	#N/A	0	No	No	2
CD244	0.29905	0.880359	-0.581309	#N/A	#N/A	#N/A	0.197845	0.513634	-0.315788	0.197845	0.513634	-0.315788	0.231927	0.528969	-0.297043	0.168055	0.488225	-0.320171	0	No	No	5
CD248	0.113638	0.229032	-0.115393	0.0525531	0.0819564	-0.0294033	#N/A	#N/A	#N/A	0.269643	0.440677	-0.171034	#N/A	#N/A	#N/A	0.239477	0.569845	-0.330368	0	No	No	1
CD28	0.546149	0.756577	-0.210428	0.669543	0.83316	-0.163618	0.593865	0.837017	-0.243152	0.593865	0.837017	-0.243152	0.801901	0.823906	-0.0220048	0.772677	0.91858	-0.145904	0	No	No	3
CD300A	0.593366	0.774746	-0.181381	0.219739	0.419898	-0.200159	0.269438	0.269058	0.000379883	0.269438	0.269058	0.000379883	0.44998	0.407269	0.0427112	0.148175	0.268409	-0.120234	0	Yes	No	1
CD300C	0.354505	0.751616	-0.397111	0.313488	0.835996	-0.522509	0.229749	0.684937	-0.455188	0.229749	0.684937	-0.455188	0.527153	0.871231	-0.344078	#N/A	#N/A	#N/A	0	No	No	5
CD300E	0.222984	0.809405	-0.586421	0.0434368	0.617004	-0.573567	0.150924	0.839854	-0.68893	0.150924	0.839854	-0.68893	0.130251	0.778699	-0.648448	0.193659	0.637143	-0.443483	0	No	No	6
CD300LB	0.229825	0.697215	-0.46739	0.0490449	0.602448	-0.553403	0.116838	0.686823	-0.569986	0.253577	0.764257	-0.510681	0.152128	0.875891	-0.723763	0.165628	0.376924	-0.211296	0	No	No	6
CD300LD	0.362196	0.816333	-0.454137	0.108365	0.731635	-0.62327	#N/A	#N/A	#N/A	#N/A	#N/A	#N/A	0.257254	0.76917	-0.511916	0.169389	0.756507	-0.587118	0	No	No	4
CD300LF	0.160885	0.712383	-0.551498	#N/A	#N/A	#N/A	0.127444	0.658319	-0.530874	0.127444	0.658319	-0.530874	0.446551	0.793995	-0.347444	0.216721	0.816496	-0.599775	0	No	No	5
CD33	0.19211	0.625535	-0.433425	#N/A	#N/A	#N/A	#N/A	#N/A	#N/A	0.0700925	0.522527	-0.452435	0.116844	0.822814	-0.70597	0.138199	0.51055	-0.372351	0	No	No	4
CD36	0.690098	0.806419	-0.116321	#N/A	#N/A	#N/A	0.666913	0.772323	-0.105409	0.681361	0.777074	-0.0957125	0.578863	0.850738	-0.271875	0.551849	0.772938	-0.221088	0	No	No	2
CD37	0.463187	0.581534	-0.118348	0.810834	0.822141	-0.0113068	0.743083	0.749031	-0.00594798	0.738234	0.717177	0.0210567	0.67081	0.39352	0.27729	0.426592	0.11707	0.309521	2	No	No	0
CD38	0.728452	0.813253	-0.0848019	0.247036	0.430641	-0.183605	0.48653	0.430101	0.0564295	0.376356	0.320765	0.055591	0.395354	0.450554	-0.0552008	0.504066	0.929545	-0.425479	0	Yes	No	1
CD3D	0.334826	0.67038	-0.335554	#N/A	#N/A	#N/A	0.615273	0.735062	-0.119789	0.64507	0.760755	-0.115685	0.557219	0.836035	-0.278816	#N/A	#N/A	#N/A	0	No	No	2
CD3E	0.38159	0.776233	-0.394644	0.693075	0.815422	-0.122347	0.532667	0.673114	-0.140447	0.188192	0.40498	-0.216788	0.582534	0.878516	-0.295982	0.078777	0.0747308	0.00404616	0	No	No	3
CD3G	0.337226	0.703014	-0.365788	0.327626	0.572477	-0.244851	0.542528	0.664574	-0.122046	0.542528	0.664574	-0.122046	0.506824	0.777807	-0.270983	0.0835889	0.0647356	0.0188534	0	No	No	3
CD40	0.14123	0.26487	-0.123639	0.06932	0.109702	-0.040382	0.0963399	0.187035	-0.0906949	0.199241	0.187662	0.0115789	0.249189	0.429676	-0.180487	0.197741	0.713775	-0.516034	0	No	No	1
CD40LG	0.569464	0.863489	-0.294025	0.575813	0.803577	-0.227764	#N/A	#N/A	#N/A	0.687245	0.945373	-0.258129	0.578719	0.813541	-0.234822	#N/A	#N/A	#N/A	0	No	No	4
CD48	0.198016	0.599201	-0.401185	0.061575	0.416005	-0.35443	#N/A	#N/A	#N/A	0.0649	0.482967	-0.418067	0.0952817	0.53166	-0.436378	0.220629	0.928022	-0.707393	0	No	No	5
CD52	0.743407	0.841283	-0.0978757	0.660448	0.449601	0.210847	0.456378	0.295796	0.160582	0.64935	0.54818	0.10117	0.709819	0.7568	-0.0469807	0.529578	0.637953	-0.108375	1	No	No	0
CD53	0.127226	0.784774	-0.657549	0.143568	0.483712	-0.340145	0.11714	0.738906	-0.621766	0.0529742	0.721592	-0.668617	0.100466	0.423518	-0.323052	#N/A	#N/A	#N/A	0	No	No	5
CD5L	0.166732	0.854387	-0.687654	0.125771	0.670767	-0.544996	#N/A	#N/A	#N/A	#N/A	#N/A	#N/A	0.211271	0.910919	-0.699648	#N/A	#N/A	#N/A	0	No	No	3
CD69	0.612435	0.851863	-0.239428	#N/A	#N/A	#N/A	#N/A	#N/A	#N/A	0.263387	0.744876	-0.481489	0.46289	0.827697	-0.364807	0.452523	0.759685	-0.307162	0	No	No	4
CD7	0.721239	0.795921	-0.0746818	0.501494	0.54404	-0.0425452	0.4763	0.568901	-0.0926003	0.4763	0.568901	-0.0926003	0.311698	0.483442	-0.171744	0.126762	0.384259	-0.257498	0	No	No	1
CD70	0.276872	0.496045	-0.219173	0.235257	0.111876	0.123381	#N/A	#N/A	#N/A	0.0635223	0.0737968	-0.0102746	0.0991511	0.117525	-0.018374	#N/A	#N/A	#N/A	0	No	No	1
CD74	0.800558	0.537768	0.26279	0.577868	0.160122	0.417746	0.778495	0.25209	0.526405	0.606306	0.173378	0.432928	0.630197	0.63607	-0.00587287	0.778924	0.817098	-0.0381744	4	No	No	0
CD79A	0.222584	0.517053	-0.294469	0.34292	0.562217	-0.219297	0.479556	0.661894	-0.182338	0.479556	0.661894	-0.182338	0.620808	0.723207	-0.102399	0.66167	0.717907	-0.0562363	0	No	No	2
CD80	0.546787	0.815405	-0.268618	0.3921	0.371837	0.0202636	0.819484	0.836929	-0.0174456	#N/A	#N/A	#N/A	0.425975	0.537769	-0.111794	0.521867	0.461562	0.0603053	0	No	No	1
CD84	0.095851	0.690989	-0.595138	0.0344321	0.69567	-0.661238	#N/A	#N/A	#N/A	#N/A	#N/A	#N/A	0.15577	0.774875	-0.619106	0.210388	0.810117	-0.59973	0	No	No	4
CD86	0.431149	0.712935	-0.281785	0.369802	0.739932	-0.37013	0.515487	0.858161	-0.342675	0.609767	0.849421	-0.239654	0.464022	0.739113	-0.275092	0.259194	0.895806	-0.636612	0	No	No	6
CD8B	0.669433	0.726616	-0.0571835	#N/A	#N/A	#N/A	#N/A	#N/A	#N/A	#N/A	#N/A	#N/A	0.437049	0.577265	-0.140215	0.49641	0.792794	-0.296384	0	No	No	1
CD93	0.55452	0.665572	-0.111052	0.0886572	0.381445	-0.292788	0.271014	0.576503	-0.305489	0.271014	0.576503	-0.305489	0.58748	0.692029	-0.104549	0.446213	0.76199	-0.315777	0	No	No	4
CD96	0.878895	0.892537	-0.0136417	0.567397	0.678528	-0.111131	0.301423	0.518214	-0.21679	0.301423	0.518214	-0.21679	0.660241	0.760291	-0.10005	0.358422	0.818931	-0.460508	0	No	No	3
CD99L2	0.338053	0.48385	-0.145797	0.0878026	0.135489	-0.0476862	0.116972	0.395641	-0.278668	0.116972	0.395641	-0.278668	0.249394	0.442373	-0.192978	0.343421	0.499576	-0.156155	0	No	No	2
CDC14C	0.226467	0.821987	-0.59552	0.469878	0.657686	-0.187808	#N/A	#N/A	#N/A	#N/A	#N/A	#N/A	0.613929	0.877285	-0.263356	#N/A	#N/A	#N/A	0	No	No	2
CDC16	0.430949	0.649142	-0.218193	0.0172064	0.0342185	-0.0170121	0.00790355	0.0107187	-0.0028151	0.00790355	0.0107187	-0.0028151	0.722732	0.678569	0.0441632	0.83104	0.859845	-0.0288054	0	No	No	1
CDC2	0.168121	0.171926	-0.0038051	0.0563815	0.0763594	-0.019978	0.0461575	0.0571756	-0.0110182	0.00616499	0.0145857	-0.00842069	0.648379	0.875733	-0.227354	0.606732	0.572329	0.0344035	0	No	No	1
CDC20B	0.0654824	0.0848689	-0.0193865	0.0305126	0.0492045	-0.0186919	0.0365887	0.0477304	-0.0111416	0.0365887	0.0477304	-0.0111416	0.230315	0.381248	-0.150933	0.347626	0.908824	-0.561198	0	No	No	1
CDC42	0.685255	0.842354	-0.1571	0.0560846	0.0722904	-0.0162058	0.284334	0.245098	0.0392362	#N/A	#N/A	#N/A	0.513816	0.188422	0.325394	0.347752	0.423374	-0.0756225	1	No	No	0
CDC42BPA	0.0910117	0.0781355	0.0128762	0.0654996	0.0803825	-0.0148828	0.0613402	0.0711013	-0.00976111	0.0855019	0.0898141	-0.00431219	0.81938	0.833633	-0.014253	0.860188	0.595317	0.264871	1	No	No	0
CDC42EP2	0.0710141	0.0480809	0.0229332	#N/A	#N/A	#N/A	0.330852	0.24266	0.0881925	0.00855097	0.0137286	-0.00517767	0.865316	0.666464	0.198851	0.509944	0.290394	0.21955	1	No	No	0
CDC42EP5	0.459679	0.392549	0.0671296	#N/A	#N/A	#N/A	0.401731	0.413477	-0.011746	0.052861	0.0713028	-0.0184417	0.880946	0.485192	0.395754	0.502548	0.437389	0.0651598	1	No	No	0
CDC6	0.13187	0.0761112	0.0557593	0.0303691	0.029768	0.000601051	0.0274598	0.0189155	0.00854427	0.0213521	0.00717115	0.0141809	0.647643	0.573008	0.0746348	0.395358	0.637668	-0.24231	0	No	No	1
CDCP1	0.770857	0.533296	0.237561	#N/A	#N/A	#N/A	#N/A	#N/A	#N/A	0.0938346	0.0927175	0.00111708	0.561268	0.580506	-0.019238	0.467732	0.722054	-0.254322	1	No	No	1
CDH1	0.510711	0.391468	0.119243	0.076888	0.0761412	0.000746787	0.0929243	0.0868071	0.0061172	0.0929243	0.0868071	0.0061172	0.51141	0.478924	0.0324857	0.402757	0.823232	-0.420475	0	No	No	1
CDH10	0.146002	0.232877	-0.0868751	0.056502	0.0838359	-0.0273339	0.267037	0.43206	-0.165024	0.0579653	0.059753	-0.0017877	0.295532	0.528707	-0.233175	#N/A	#N/A	#N/A	0	No	No	1
CDH12	0.360875	0.841991	-0.481116	0.518023	0.799427	-0.281405	0.328477	0.40778	-0.0793028	0.314025	0.161776	0.15225	0.532369	0.931934	-0.399565	0.491049	0.845325	-0.354276	0	No	No	4
CDH13	0.346997	0.471363	-0.124366	0.0554738	0.0862085	-0.0307347	0.057325	0.0874951	-0.03017	0.0448685	0.0722501	-0.0273815	0.468217	0.679524	-0.211307	0.74884	0.92877	-0.179929	0	Yes	No	1
CDH17	0.74013	0.798071	-0.0579416	0.517598	0.733243	-0.215645	0.720016	0.744119	-0.0241037	0.343702	0.390684	-0.0469822	0.323067	0.438231	-0.115164	0.889591	0.911596	-0.022005	0	No	No	1
CDH18	0.19048	0.245292	-0.0548121	0.0236786	0.0454748	-0.0217962	0.310328	0.575119	-0.264791	0.0461299	0.0387348	0.00739508	0.455344	0.818407	-0.363063	0.424981	0.888287	-0.463306	0	No	No	3
CDH19	0.316683	0.854435	-0.537751	0.224411	0.854497	-0.630086	#N/A	#N/A	#N/A	#N/A	#N/A	#N/A	#N/A	#N/A	#N/A	#N/A	#N/A	#N/A	0	No	No	2
CDH20	0.195518	0.867456	-0.671938	#N/A	#N/A	#N/A	#N/A	#N/A	#N/A	0.756968	0.925813	-0.168845	0.607963	0.706538	-0.0985751	0.855102	0.802201	0.0529011	0	No	No	1
CDH22	0.374404	0.86488	-0.490476	0.176218	0.503838	-0.32762	0.151966	0.248252	-0.0962855	0.0928773	0.209573	-0.116696	0.218032	0.474221	-0.256188	0.408302	0.64238	-0.234078	0	No	No	4
CDH26	0.528698	0.811483	-0.282785	0.750054	0.877773	-0.127719	0.641551	0.868317	-0.226766	0.641551	0.868317	-0.226766	0.483089	0.836047	-0.352958	#N/A	#N/A	#N/A	0	No	No	4
CDH3	0.486608	0.311557	0.17505	0.509019	0.423365	0.0856543	0.348461	0.0482933	0.300168	0.348461	0.0482933	0.300168	0.619585	0.600923	0.0186621	0.8978	0.897536	0.0002641	2	No	No	0
CDH4	0.225315	0.308286	-0.0829713	#N/A	#N/A	#N/A	#N/A	#N/A	#N/A	#N/A	#N/A	#N/A	0.479765	0.729996	-0.250231	0.5221	0.741924	-0.219824	0	No	No	2
CDH6	0.150763	0.550431	-0.399668	0.0875528	0.128861	-0.041308	0.175746	0.224504	-0.0487577	0.00863099	0.0290658	-0.0204348	0.592786	0.83066	-0.237874	0.560657	0.81908	-0.258423	0	No	No	3
CDH7	0.139979	0.18884	-0.0488612	0.0690653	0.0842084	-0.0151431	0.0796099	0.0775982	0.00201166	0.0571673	0.0796144	-0.0224471	0.47425	0.927586	-0.453336	#N/A	#N/A	#N/A	0	Yes	No	1
CDH8	0.178605	0.248225	-0.0696192	0.0591795	0.0919083	-0.0327287	0.177898	0.342745	-0.164847	0.0225544	0.033001	-0.0104466	0.387344	0.756883	-0.369539	#N/A	#N/A	#N/A	0	Yes	No	1
CDH9	0.334173	0.659521	-0.325348	0.188202	0.16849	0.0197117	0.455308	0.642901	-0.187592	0.492422	0.456273	0.0361493	#N/A	#N/A	#N/A	0.512009	0.921418	-0.409409	0	No	No	2
CDK1	0.226641	0.233462	-0.00682062	0.0419273	0.0497648	-0.00783742	0.0533143	0.0706043	-0.01729	0.0563815	0.0763594	-0.019978	0.648379	0.875733	-0.227354	0.606732	0.572329	0.0344035	0	No	No	1
CDK14	0.725766	0.699791	0.0259754	0.716468	0.901749	-0.18528	#N/A	#N/A	#N/A	0.33859	0.558076	-0.219486	0.740447	0.803983	-0.0635363	0.732385	0.804896	-0.0725104	0	No	No	1
CDK18	0.823469	0.792604	0.0308648	0.0595332	0.0472782	0.012255	0.471621	0.513672	-0.0420513	0.079851	0.0951185	-0.0152675	0.406167	0.619233	-0.213066	0.503913	0.670484	-0.166571	0	No	No	1
CDK20	0.481619	0.82124	-0.339621	0.110182	0.0952529	0.0149291	0.0278469	0.0366649	-0.00881803	0.0278469	0.0366649	-0.00881803	0.590307	0.530428	0.0598792	#N/A	#N/A	#N/A	0	No	No	1
CDKL2	0.280065	0.261816	0.0182497	0.0383248	0.0454288	-0.00710402	0.407298	0.451594	-0.0442955	0.0532827	0.0592026	-0.00591992	0.576734	0.894964	-0.31823	0.649924	0.75382	-0.103896	0	No	No	1
CDKL5	0.542595	0.594426	-0.0518318	0.0412486	0.262674	-0.221426	0.552707	0.643473	-0.0907666	0.175752	0.342107	-0.166355	0.417098	0.246374	0.170723	0.853368	0.89975	-0.0463813	0	No	No	1
CDKN2A	0.0508943	0.0491405	0.00175381	#N/A	#N/A	#N/A	#N/A	#N/A	#N/A	0.127738	0.118981	0.00875629	0.212319	0.0995401	0.112779	0.447519	0.104352	0.343167	1	Yes	No	0
CDO1	0.542801	0.554678	-0.011877	0.0220917	0.0641697	-0.042078	0.0709457	0.104217	-0.0332709	0.0719972	0.102293	-0.0302957	0.565572	0.636167	-0.0705953	0.508312	0.763144	-0.254832	0	No	No	1
CDRT1	0.852563	0.89225	-0.0396863	#N/A	#N/A	#N/A	0.352451	0.370155	-0.0177038	0.352451	0.370155	-0.0177038	0.393534	0.542003	-0.148469	0.391288	0.746064	-0.354775	0	No	No	1
CDRT4	0.814955	0.809644	0.00531064	#N/A	#N/A	#N/A	0.149986	0.163231	-0.0132451	#N/A	#N/A	#N/A	0.93184	0.941454	-0.00961373	0.187545	0.437778	-0.250232	0	No	No	1
CDX4	0.338942	0.757174	-0.418232	0.405551	0.633558	-0.228007	#N/A	#N/A	#N/A	0.466175	0.666186	-0.200011	0.0877925	0.352523	-0.26473	#N/A	#N/A	#N/A	0	Yes	No	4
CDYL2	0.256031	0.256339	-0.000307703	0.0174789	0.019403	-0.00192404	#N/A	#N/A	#N/A	#N/A	#N/A	#N/A	0.574386	0.798871	-0.224485	0.827096	0.884653	-0.0575563	0	No	No	1
CEACAM18	0.210833	0.745556	-0.534723	0.380893	0.866489	-0.485596	#N/A	#N/A	#N/A	#N/A	#N/A	#N/A	0.257105	0.55914	-0.302035	#N/A	#N/A	#N/A	0	No	No	3
CEACAM20	0.329074	0.793823	-0.464749	0.5487	0.79259	-0.24389	#N/A	#N/A	#N/A	#N/A	#N/A	#N/A	0.272155	0.656592	-0.384437	#N/A	#N/A	#N/A	0	No	No	3
CEACAM21	0.241005	0.694372	-0.453367	0.0454983	0.282396	-0.236898	0.0562528	0.370069	-0.313816	0.0562528	0.370069	-0.313816	0.294207	0.408109	-0.113901	0.231399	0.608057	-0.376659	0	No	No	5
CEACAM3	0.231906	0.561264	-0.329358	#N/A	#N/A	#N/A	#N/A	#N/A	#N/A	#N/A	#N/A	#N/A	0.204229	0.687905	-0.483677	0.116776	0.807466	-0.690691	0	No	No	3
CEACAM4	0.158013	0.584107	-0.426094	0.0803905	0.387168	-0.306777	0.0936282	0.382071	-0.288443	0.0936282	0.382071	-0.288443	#N/A	#N/A	#N/A	0.200436	0.628974	-0.428538	0	No	No	5
CEACAM5	0.133078	0.413984	-0.280906	0.0885148	0.345993	-0.257478	0.0649474	0.253572	-0.188624	0.0649474	0.253572	-0.188624	0.288178	0.741133	-0.452955	0.247145	0.894722	-0.647577	0	No	No	4
CEACAM6	0.141441	0.27046	-0.129019	0.154641	0.493809	-0.339168	#N/A	#N/A	#N/A	#N/A	#N/A	#N/A	0.307633	0.802892	-0.495259	0.264504	0.781242	-0.516739	0	No	No	3
CEACAM7	0.229145	0.702934	-0.473789	#N/A	#N/A	#N/A	#N/A	#N/A	#N/A	#N/A	#N/A	#N/A	0.219404	0.742489	-0.523085	#N/A	#N/A	#N/A	0	No	No	2
CEACAM8	0.3841	0.807961	-0.423861	0.292372	0.529842	-0.23747	0.238764	0.482752	-0.243988	0.238764	0.482752	-0.243988	#N/A	#N/A	#N/A	0.372043	0.785286	-0.413243	0	No	No	5
CECR1	0.45752	0.74503	-0.28751	0.246352	0.257076	-0.0107246	0.198142	0.488334	-0.290192	0.255463	0.566285	-0.310822	0.28434	0.366371	-0.0820313	0.61721	0.874238	-0.257028	0	No	No	4
CECR2	0.191973	0.897382	-0.705409	0.27204	0.545755	-0.273715	#N/A	#N/A	#N/A	0.447353	0.600523	-0.15317	0.0805003	0.254433	-0.173933	0.655197	0.88105	-0.225853	0	No	No	3
CECR5	0.212342	0.356001	-0.143659	0.255854	0.533061	-0.277207	#N/A	#N/A	#N/A	#N/A	#N/A	#N/A	0.508267	0.611794	-0.103528	0.619317	0.695724	-0.0764077	0	No	No	1
CECR6	0.148805	0.139302	0.00950278	0.0365732	0.0746369	-0.0380636	0.259566	0.221606	0.0379598	0.31096	0.372038	-0.061078	0.755423	0.241212	0.514211	0.165819	0.663098	-0.497279	1	No	No	1
CECR7	0.310418	0.536511	-0.226093	0.348188	0.523058	-0.17487	#N/A	#N/A	#N/A	#N/A	#N/A	#N/A	0.374334	0.692952	-0.318618	#N/A	#N/A	#N/A	0	No	No	2
CELA3A	0.867	0.899414	-0.0324134	0.649841	0.744273	-0.0944314	#N/A	#N/A	#N/A	0.258563	0.42044	-0.161877	0.550875	0.765497	-0.214622	#N/A	#N/A	#N/A	0	No	No	1
CELP	0.410114	0.830902	-0.420788	#N/A	#N/A	#N/A	#N/A	#N/A	#N/A	#N/A	#N/A	#N/A	#N/A	#N/A	#N/A	#N/A	#N/A	#N/A	0	No	No	1
CENPB	0.0848287	0.0838572	0.000971504	0.00974415	0.0236943	-0.0139502	#N/A	#N/A	#N/A	0.364417	0.268661	0.0957567	#N/A	#N/A	#N/A	0.573738	0.305108	0.26863	1	No	No	0
CENPI	0.227362	0.511618	-0.284256	#N/A	#N/A	#N/A	0.671952	0.788886	-0.116934	0.628486	0.704109	-0.0756226	0.607628	0.638062	-0.0304339	#N/A	#N/A	#N/A	0	No	No	1
CEP170L	0.677552	0.863977	-0.186426	#N/A	#N/A	#N/A	#N/A	#N/A	#N/A	#N/A	#N/A	#N/A	0.600759	0.911855	-0.311096	#N/A	#N/A	#N/A	0	No	No	1
CERK	0.30569	0.234455	0.0712351	0.0269305	0.0402164	-0.0132859	#N/A	#N/A	#N/A	0.053155	0.0783733	-0.0252183	0.84302	0.839257	0.0037631	0.837131	0.611284	0.225847	1	No	No	0
CERKL	0.541889	0.747347	-0.205458	0.0567126	0.0556786	0.00103395	#N/A	#N/A	#N/A	0.017209	0.02299	-0.00578096	0.369906	0.500302	-0.130397	#N/A	#N/A	#N/A	0	No	No	1
CES2	0.0513101	0.0488893	0.0024208	0.0109404	0.00738084	0.00355952	0.0209906	0.0273116	-0.00632095	0.108716	0.0921559	0.01656	0.702187	0.648871	0.0533163	0.569682	0.926394	-0.356713	0	No	No	1
CES4	0.243217	0.555753	-0.312535	0.180809	0.153971	0.0268378	#N/A	#N/A	#N/A	#N/A	#N/A	#N/A	0.289618	0.458828	-0.16921	#N/A	#N/A	#N/A	0	No	No	1
CES7	0.517458	0.872083	-0.354625	0.207447	0.829776	-0.622329	0.209197	0.546163	-0.336966	0.209197	0.546163	-0.336966	0.582356	0.849101	-0.266746	0.282695	0.794788	-0.512093	0	No	No	6
CETN2	0.296335	0.455351	-0.159017	0.303249	0.430052	-0.126803	0.570118	0.551486	0.0186329	0.570118	0.551486	0.0186329	0.620749	0.724675	-0.103926	0.42874	0.741248	-0.312508	0	No	No	1
CFC1	0.551075	0.77251	-0.221435	#N/A	#N/A	#N/A	#N/A	#N/A	#N/A	#N/A	#N/A	#N/A	0.384676	0.731291	-0.346615	#N/A	#N/A	#N/A	0	No	No	2
CFC1B	0.551075	0.77251	-0.221435	#N/A	#N/A	#N/A	#N/A	#N/A	#N/A	#N/A	#N/A	#N/A	0.384676	0.731291	-0.346615	#N/A	#N/A	#N/A	0	No	No	2
CFD	0.53023	0.725248	-0.195018	0.388761	0.611255	-0.222494	0.237634	0.523985	-0.286351	0.237634	0.523985	-0.286351	0.0997731	0.201003	-0.10123	0.275102	0.520239	-0.245137	0	No	No	4
CFH	0.80554	0.93632	-0.13078	0.0630913	0.223511	-0.160419	#N/A	#N/A	#N/A	#N/A	#N/A	#N/A	0.51561	0.725803	-0.210193	#N/A	#N/A	#N/A	0	No	No	1
CFHR1	0.361286	0.795025	-0.43374	#N/A	#N/A	#N/A	#N/A	#N/A	#N/A	#N/A	#N/A	#N/A	0.451667	0.708913	-0.257246	#N/A	#N/A	#N/A	0	No	No	2
CFHR2	0.379329	0.798056	-0.418727	#N/A	#N/A	#N/A	#N/A	#N/A	#N/A	#N/A	#N/A	#N/A	0.506573	0.754402	-0.247828	#N/A	#N/A	#N/A	0	No	No	2
CFHR3	0.447539	0.615477	-0.167938	#N/A	#N/A	#N/A	#N/A	#N/A	#N/A	#N/A	#N/A	#N/A	0.640471	0.95581	-0.315339	#N/A	#N/A	#N/A	0	No	No	1
CFHR4	0.646037	0.854701	-0.208665	#N/A	#N/A	#N/A	#N/A	#N/A	#N/A	#N/A	#N/A	#N/A	0.614257	0.581078	0.0331789	#N/A	#N/A	#N/A	0	No	No	1
CFHR5	0.652826	0.87741	-0.224584	0.59621	0.735907	-0.139697	#N/A	#N/A	#N/A	#N/A	#N/A	#N/A	0.594114	0.889337	-0.295223	#N/A	#N/A	#N/A	0	No	No	2
CFI	0.857309	0.914469	-0.0571603	#N/A	#N/A	#N/A	0.105699	0.138733	-0.0330343	0.105699	0.138733	-0.0330343	0.803216	0.877831	-0.0746149	0.63717	0.934022	-0.296852	0	No	No	1
CFTR	0.51493	0.175492	0.339438	0.299803	0.109152	0.190651	0.221195	0.145694	0.0755008	0.221195	0.145694	0.0755008	0.445166	0.812631	-0.367464	#N/A	#N/A	#N/A	1	Yes	No	1
CGA	0.693254	0.792626	-0.0993718	0.278033	0.246451	0.0315813	0.461946	0.746475	-0.284529	0.512835	0.864531	-0.351696	#N/A	#N/A	#N/A	#N/A	#N/A	#N/A	0	No	No	2
CGB	0.476624	0.568361	-0.0917373	0.507934	0.694275	-0.186341	0.67348	0.882265	-0.208785	0.67348	0.882265	-0.208785	0.716963	0.799288	-0.0823248	#N/A	#N/A	#N/A	0	No	No	2
CGB8	0.387031	0.627289	-0.240257	0.400456	0.450478	-0.0500212	0.583761	0.736915	-0.153154	0.583761	0.736915	-0.153154	#N/A	#N/A	#N/A	#N/A	#N/A	#N/A	0	No	No	1
CGN	0.044557	0.053034	-0.00847698	#N/A	#N/A	#N/A	0.331287	0.330151	0.00113676	#N/A	#N/A	#N/A	0.612574	0.726544	-0.113969	0.283112	0.739968	-0.456856	0	No	No	1
CHAF1B	0.608984	0.819482	-0.210498	0.0276657	0.0422975	-0.0146318	0.0919665	0.0992585	-0.00729198	#N/A	#N/A	#N/A	0.658374	0.564225	0.0941488	0.885963	0.89983	-0.0138675	0	No	No	1
CHCHD6	0.161475	0.304077	-0.142602	0.0111777	0.0137053	-0.00252753	0.00103844	0.00627347	-0.00523503	0.00103844	0.00627347	-0.00523503	0.663603	0.665909	-0.00230564	0.875759	0.613932	0.261827	1	No	No	0
CHCHD7	0.048164	0.0803635	-0.0321995	#N/A	#N/A	#N/A	0.358419	0.36196	-0.00354146	0.0411526	0.0437505	-0.00259787	0.927631	0.939443	-0.0118126	0.534783	0.85977	-0.324987	0	No	No	1
CHD5	0.0914527	0.100869	-0.00941603	0.00604809	0.016267	-0.0102189	#N/A	#N/A	#N/A	0.0184934	0.0232858	-0.00479245	0.453789	0.635921	-0.182132	0.378137	0.673752	-0.295615	0	Yes	No	1
CHD6	0.238938	0.275581	-0.0366431	0.0379495	0.0506111	-0.0126617	0.334481	0.283697	0.0507838	0.0401383	0.0468515	-0.00671313	0.780772	0.552372	0.2284	0.955141	0.933805	0.0213359	1	No	No	0
CHD7	0.0704428	0.0721295	-0.00168678	0.00830518	0.0135052	-0.00520003	0.335759	0.468521	-0.132761	0.0211189	0.0214256	-0.000306619	0.55824	0.785416	-0.227176	0.561064	0.79496	-0.233896	0	No	No	2
CHGA	0.358319	0.555109	-0.19679	0.0599313	0.134956	-0.075025	0.171254	0.0864008	0.084853	0.171254	0.0864008	0.084853	0.274554	0.484385	-0.209831	#N/A	#N/A	#N/A	0	No	No	1
CHGB	0.167244	0.0761041	0.0911397	0.228797	0.105668	0.123129	0.060964	0.0736393	-0.0126753	0.060964	0.0736393	-0.0126753	0.214403	0.341305	-0.126902	0.326633	0.722784	-0.396151	0	No	No	1
CHIA	0.293585	0.820551	-0.526966	0.21689	0.389015	-0.172124	0.343905	0.872513	-0.528607	#N/A	#N/A	#N/A	0.384948	0.887202	-0.502254	#N/A	#N/A	#N/A	0	No	No	3
CHIC1	0.234744	0.438103	-0.203359	0.264983	0.443275	-0.178292	0.0569135	0.119806	-0.0628921	0.170097	0.290146	-0.120049	0.37146	0.464845	-0.093385	#N/A	#N/A	#N/A	0	No	No	1
CHIT1	0.527495	0.825168	-0.297673	0.6116	0.854337	-0.242738	#N/A	#N/A	#N/A	0.868986	0.908288	-0.0393023	0.695035	0.85794	-0.162906	0.0597032	0.0774176	-0.0177144	0	No	No	2
CHL1	0.12268	0.220837	-0.0981575	0.0630428	0.0280434	0.0349994	0.418808	0.397357	0.0214506	#N/A	#N/A	#N/A	0.533941	0.773081	-0.239141	0.688082	0.908316	-0.220233	0	Yes	No	2
CHM	0.223023	0.493374	-0.270351	0.0987313	0.328507	-0.229775	0.0719197	0.117762	-0.045842	0.114383	0.216747	-0.102364	0.890501	0.893939	-0.00343863	0.836003	0.752096	0.0839071	0	No	No	2
CHODL	0.419173	0.561118	-0.141945	0.0777347	0.0827122	-0.00497754	0.0336023	0.0446422	-0.0110398	0.0336023	0.0446422	-0.0110398	0.0808291	0.0990253	-0.0181962	0.221896	0.729516	-0.507621	0	Yes	No	1
CHP2	0.396485	0.64378	-0.247295	0.0844912	0.137538	-0.0530466	0.0266169	0.0217631	0.0048538	0.0266169	0.0217631	0.0048538	0.191106	0.378238	-0.187133	0.186928	0.820205	-0.633277	0	No	No	2
CHRFAM7A	#N/A	#N/A	#N/A	#N/A	#N/A	#N/A	0.484298	0.613009	-0.128711	#N/A	#N/A	#N/A	0.613259	0.912501	-0.299242	#N/A	#N/A	#N/A	0	No	No	1
CHRM1	0.256582	0.526817	-0.270234	0.201025	0.267543	-0.0665175	0.568326	0.664037	-0.0957104	0.444408	0.530322	-0.0859142	0.887928	0.899696	-0.0117676	0.1538	0.296422	-0.142622	0	No	No	1
CHRM3	#N/A	#N/A	#N/A	#N/A	#N/A	#N/A	0.429512	0.673301	-0.243789	0.677193	0.703638	-0.0264447	0.645141	0.926084	-0.280943	#N/A	#N/A	#N/A	0	Yes	No	2
CHRNA4	0.192345	0.380255	-0.18791	#N/A	#N/A	#N/A	#N/A	#N/A	#N/A	0.0573148	0.0445041	0.0128106	0.419496	0.725074	-0.305578	0.195586	0.423596	-0.22801	0	No	No	2
CHRNA6	0.621339	0.874213	-0.252874	0.153338	0.566525	-0.413187	#N/A	#N/A	#N/A	#N/A	#N/A	#N/A	0.610559	0.833844	-0.223285	0.505053	0.616281	-0.111228	0	No	No	3
CHRNA7	0.0555665	0.065585	-0.0100185	0.0575286	0.0560505	0.00147807	#N/A	#N/A	#N/A	0.00726766	0.0198195	-0.0125518	0.285216	0.503754	-0.218538	#N/A	#N/A	#N/A	0	No	No	1
CHRNA9	0.388058	0.627683	-0.239625	0.610974	0.644477	-0.0335035	#N/A	#N/A	#N/A	#N/A	#N/A	#N/A	0.386772	0.85305	-0.466277	0.337677	0.872934	-0.535257	0	No	No	3
CHRNB2	0.260693	0.468283	-0.20759	0.165899	0.106253	0.0596454	0.056629	0.0612461	-0.00461718	0.0456173	0.0505488	-0.00493156	0.567093	0.770651	-0.203559	0.482807	0.315843	0.166964	0	No	No	2
CHRNB3	0.798125	0.938075	-0.13995	0.430895	0.728251	-0.297356	0.832158	0.94132	-0.109162	0.671417	0.875717	-0.204301	0.520672	0.713082	-0.19241	0.823955	0.905363	-0.0814074	0	No	No	2
CHRNE	0.125066	0.214239	-0.0891731	0.314068	0.464698	-0.150631	#N/A	#N/A	#N/A	0.68593	0.772825	-0.0868956	0.659083	0.333328	0.325755	0.882501	0.91485	-0.0323489	1	No	No	0
CHST13	0.0796162	0.175965	-0.096349	0.0675874	0.0638216	0.00376579	#N/A	#N/A	#N/A	#N/A	#N/A	#N/A	0.35333	0.418144	-0.0648137	0.740396	0.941851	-0.201455	0	No	No	1
CHST4	0.398635	0.490998	-0.092363	#N/A	#N/A	#N/A	0.117881	0.482357	-0.364476	0.0799507	0.0982917	-0.0183411	0.303196	0.807943	-0.504747	0.1333	0.674375	-0.541075	0	No	No	3
CHST8	0.359066	0.587684	-0.228618	0.0729738	0.066719	0.00625484	0.170327	0.380986	-0.210659	0.121428	0.0805726	0.0408554	0.43207	0.784772	-0.352703	0.386592	0.753641	-0.367049	0	Yes	No	4
CHST9	0.303832	0.537318	-0.233486	0.239679	0.241724	-0.00204561	0.166468	0.235727	-0.069259	0.0871724	0.0569463	0.0302261	0.203557	0.259914	-0.056357	#N/A	#N/A	#N/A	0	No	No	1
CIAPIN1	0.0467086	0.052485	-0.00577639	0.0305525	0.0380301	-0.00747756	0.35868	0.403517	-0.0448367	#N/A	#N/A	#N/A	0.695021	0.930379	-0.235358	0.718634	0.671301	0.0473323	0	No	No	1
CIB3	#N/A	#N/A	#N/A	0.348937	0.593131	-0.244194	#N/A	#N/A	#N/A	0.334672	0.440934	-0.106262	0.380328	0.607618	-0.22729	0.648142	0.875665	-0.227524	0	No	No	3
CIB4	0.84183	0.856794	-0.0149636	0.894723	0.910046	-0.015323	#N/A	#N/A	#N/A	#N/A	#N/A	#N/A	0.569634	0.643508	-0.0738741	0.506739	0.769636	-0.262896	0	No	No	1
CIITA	0.408861	0.632629	-0.223768	0.175236	0.412316	-0.237079	0.181192	0.538772	-0.35758	0.142661	0.478473	-0.335811	0.377834	0.615846	-0.238011	0.919348	0.932432	-0.0130839	0	No	No	5
CISD1	0.0370803	0.0448749	-0.0077946	0.0472349	0.0744178	-0.027183	0.110614	0.165823	-0.0552089	0.110614	0.165823	-0.0552089	0.406153	0.399735	0.00641847	0.609422	0.833038	-0.223616	0	No	No	1
CKM	0.117687	0.181203	-0.063516	0.348188	0.39379	-0.0456021	0.509532	0.763364	-0.253832	#N/A	#N/A	#N/A	0.763316	0.76587	-0.00255413	0.109215	0.205727	-0.096512	0	No	No	1
CKMT1A	#N/A	#N/A	#N/A	0.142392	0.283621	-0.141229	#N/A	#N/A	#N/A	#N/A	#N/A	#N/A	0.163851	0.680417	-0.516566	0.4897	0.832746	-0.343046	0	No	No	2
CKMT1B	#N/A	#N/A	#N/A	0.122955	0.242142	-0.119187	#N/A	#N/A	#N/A	#N/A	#N/A	#N/A	0.438575	0.856701	-0.418126	0.325294	0.722211	-0.396918	0	No	No	2
CLC	0.179924	0.662856	-0.482932	0.0823559	0.175535	-0.0931791	#N/A	#N/A	#N/A	#N/A	#N/A	#N/A	0.42602	0.860831	-0.434811	#N/A	#N/A	#N/A	0	No	No	2
CLCA2	0.856209	0.876402	-0.0201927	#N/A	#N/A	#N/A	#N/A	#N/A	#N/A	#N/A	#N/A	#N/A	0.439868	0.434414	0.0054545	0.52193	0.826232	-0.304302	0	No	No	1
CLCA3P	0.580451	0.708622	-0.128172	#N/A	#N/A	#N/A	#N/A	#N/A	#N/A	#N/A	#N/A	#N/A	0.487339	0.897264	-0.409925	#N/A	#N/A	#N/A	0	No	No	1
CLCA4	0.68066	0.74114	-0.0604795	#N/A	#N/A	#N/A	#N/A	#N/A	#N/A	#N/A	#N/A	#N/A	0.561936	0.832639	-0.270703	#N/A	#N/A	#N/A	0	No	No	1
CLCC1	0.168216	0.491607	-0.323391	0.0401898	0.0395666	0.000623193	0.254178	0.26638	-0.0122012	0.0251293	0.0371126	-0.0119833	0.323803	0.135046	0.188757	0.936049	0.915659	0.0203899	0	No	No	1
CLCN5	0.520888	0.626513	-0.105625	0.257683	0.562786	-0.305103	0.407761	0.55169	-0.143929	0.334616	0.436738	-0.102123	0.578582	0.721529	-0.142947	#N/A	#N/A	#N/A	0	No	No	1
CLDN1	0.447266	0.223233	0.224033	0.0422687	0.0364324	0.0058363	0.0579892	0.0546427	0.0033465	0.0639764	0.0715012	-0.00752485	0.675263	0.754371	-0.0791074	0.395947	0.554264	-0.158318	1	No	No	0
CLDN11	0.12434	0.116566	0.00777331	0.0579077	0.0678384	-0.00993066	0.129061	0.133713	-0.00465187	0.173295	0.116838	0.0564578	0.730397	0.489188	0.241208	0.873579	0.933602	-0.0600226	1	No	No	0
CLDN15	0.612767	0.600832	0.0119346	0.262699	0.232545	0.0301543	0.259512	0.196561	0.0629514	0.32336	0.349007	-0.0256476	0.770177	0.52085	0.249327	0.421336	0.122358	0.298978	2	No	No	0
CLDN16	0.866377	0.881739	-0.0153619	0.577046	0.721654	-0.144608	#N/A	#N/A	#N/A	0.66861	0.8684	-0.19979	0.561445	0.922927	-0.361482	#N/A	#N/A	#N/A	0	No	No	1
CLDN17	0.42428	0.820081	-0.395801	0.240004	0.708259	-0.468255	#N/A	#N/A	#N/A	0.476183	0.919982	-0.443798	#N/A	#N/A	#N/A	#N/A	#N/A	#N/A	0	No	No	3
CLDN18	0.749415	0.766814	-0.017399	0.795642	0.870546	-0.0749045	0.65215	0.923449	-0.271299	0.820653	0.898134	-0.0774808	0.879503	0.85258	0.0269235	0.547998	0.855938	-0.307941	0	No	No	2
CLDN19	0.806908	0.772091	0.0348171	0.830199	0.46206	0.36814	#N/A	#N/A	#N/A	0.812994	0.615401	0.197592	0.790553	0.810804	-0.0202504	0.886328	0.898243	-0.0119146	1	No	No	0
CLDN2	0.484151	0.697187	-0.213036	0.141855	0.387935	-0.24608	0.507655	0.663507	-0.155853	0.528156	0.636871	-0.108715	0.579493	0.78239	-0.202897	0.429548	0.517931	-0.0883822	0	No	No	3
CLDN25	0.250375	0.530682	-0.280308	0.430533	0.63198	-0.201447	#N/A	#N/A	#N/A	0.593932	0.736508	-0.142576	#N/A	#N/A	#N/A	#N/A	#N/A	#N/A	0	No	No	2
CLDN3	0.117755	0.0956882	0.0220666	0.017255	0.0212422	-0.00398722	0.00562678	0.0157624	-0.0101357	0.386472	0.18862	0.197852	#N/A	#N/A	#N/A	0.670914	0.277224	0.39369	1	No	No	0
CLDN6	0.373974	0.408177	-0.0342022	0.162627	0.0663975	0.0962297	0.556082	0.280423	0.275659	#N/A	#N/A	#N/A	0.747406	0.916248	-0.168842	0.235947	0.380141	-0.144194	1	Yes	No	0
CLDN7	0.288086	0.188988	0.0990987	0.105481	0.0440558	0.0614254	0.492207	0.280536	0.211671	0.551233	0.360708	0.190526	0.155692	0.0868474	0.0688448	0.924991	0.921117	0.0038746	1	No	No	0
CLDN8	0.606108	0.919952	-0.313845	0.467975	0.87301	-0.405035	#N/A	#N/A	#N/A	0.608684	0.922904	-0.31422	#N/A	#N/A	#N/A	#N/A	#N/A	#N/A	0	No	No	3
CLDND2	0.648395	0.857688	-0.209293	0.502142	0.611099	-0.108956	0.646851	0.635012	0.011839	0.646851	0.635012	0.011839	0.0461199	0.0523001	-0.00618022	0.00341938	0.0242195	-0.0208001	0	No	No	1
CLEC10A	0.162558	0.557406	-0.394849	#N/A	#N/A	#N/A	0.493597	0.858289	-0.364692	0.651489	0.93767	-0.286181	0.292961	0.804838	-0.511877	0.348395	0.875657	-0.527262	0	No	No	5
CLEC12A	0.701457	0.888323	-0.186866	#N/A	#N/A	#N/A	#N/A	#N/A	#N/A	#N/A	#N/A	#N/A	0.521169	0.906341	-0.385172	#N/A	#N/A	#N/A	0	No	No	1
CLEC12B	0.481091	0.799361	-0.318269	0.108875	0.445422	-0.336548	0.460999	0.718952	-0.257954	0.460999	0.718952	-0.257954	0.574321	0.660814	-0.0864926	0.448936	0.873141	-0.424205	0	No	No	5
CLEC14A	0.27837	0.72188	-0.44351	0.551611	0.590735	-0.0391238	0.600351	0.276733	0.323618	0.47248	0.261923	0.210557	#N/A	#N/A	#N/A	0.423302	0.709286	-0.285984	2	Yes	No	2
CLEC17A	0.579039	0.842	-0.262961	0.327381	0.618872	-0.291491	#N/A	#N/A	#N/A	#N/A	#N/A	#N/A	0.336731	0.529324	-0.192593	0.142714	0.758449	-0.615735	0	No	No	3
CLEC18B	0.752787	0.856096	-0.103309	0.60021	0.643443	-0.0432337	0.346941	0.369503	-0.0225619	0.335572	0.41755	-0.0819781	0.125617	0.402141	-0.276524	#N/A	#N/A	#N/A	0	No	No	1
CLEC1A	0.43317	0.762083	-0.328913	0.372049	0.497802	-0.125753	0.335322	0.432443	-0.0971205	0.335322	0.432443	-0.0971205	0.17199	0.481425	-0.309435	0.477119	0.916215	-0.439096	0	No	No	3
CLEC1B	0.665201	0.934828	-0.269627	#N/A	#N/A	#N/A	0.525332	0.799662	-0.27433	0.525332	0.799662	-0.27433	0.49369	0.884869	-0.391178	#N/A	#N/A	#N/A	0	No	No	4
CLEC2A	0.673904	0.734895	-0.0609913	0.25818	0.563027	-0.304847	0.637273	0.945331	-0.308058	0.637273	0.945331	-0.308058	#N/A	#N/A	#N/A	0.174231	0.870478	-0.696248	0	No	No	4
CLEC2B	0.0652541	0.369296	-0.304042	#N/A	#N/A	#N/A	0.0437791	0.0947314	-0.0509523	0.0437791	0.0947314	-0.0509523	0.785856	0.947636	-0.16178	#N/A	#N/A	#N/A	0	No	No	1
CLEC2D	0.913679	0.930168	-0.0164885	0.436256	0.851919	-0.415663	#N/A	#N/A	#N/A	#N/A	#N/A	#N/A	0.504124	0.686547	-0.182423	0.670273	0.823686	-0.153413	0	No	No	1
CLEC3A	0.334308	0.919489	-0.585181	0.164001	0.423505	-0.259504	#N/A	#N/A	#N/A	0.105334	0.28463	-0.179296	0.168964	0.438592	-0.269629	0.445622	0.891357	-0.445734	0	No	No	4
CLEC4A	0.728247	0.807782	-0.0795346	0.916785	0.932901	-0.0161165	#N/A	#N/A	#N/A	0.601632	0.81303	-0.211398	0.889126	0.939896	-0.0507707	#N/A	#N/A	#N/A	0	No	No	1
CLEC4C	0.213113	0.739806	-0.526693	0.110728	0.713743	-0.603014	0.200877	0.689073	-0.488197	0.177601	0.640424	-0.462823	0.432	0.933844	-0.501844	#N/A	#N/A	#N/A	0	No	No	5
CLEC4D	0.41367	0.792691	-0.379021	#N/A	#N/A	#N/A	0.206973	0.790446	-0.583473	0.206973	0.790446	-0.583473	0.0671379	0.55068	-0.483542	0.117462	0.775979	-0.658517	0	No	No	5
CLEC4E	0.432916	0.776823	-0.343907	#N/A	#N/A	#N/A	0.455152	0.720164	-0.265012	0.455152	0.720164	-0.265012	0.422128	0.727614	-0.305486	0.331859	0.844796	-0.512938	0	No	No	5
CLEC4F	0.745479	0.881956	-0.136476	#N/A	#N/A	#N/A	0.339492	0.56677	-0.227278	0.396475	0.496592	-0.100117	0.6337	0.866177	-0.232477	0.389077	0.533831	-0.144754	0	No	No	2
CLEC4G	0.197991	0.58337	-0.385378	0.108308	0.289362	-0.181054	0.182985	0.402216	-0.219231	0.182985	0.402216	-0.219231	0.154994	0.188095	-0.0331006	0.040813	0.166367	-0.125554	0	Yes	No	3
CLEC4GP1	0.351232	0.678342	-0.327109	0.256398	0.334079	-0.0776805	#N/A	#N/A	#N/A	#N/A	#N/A	#N/A	0.0778454	0.174306	-0.0964605	#N/A	#N/A	#N/A	0	No	No	1
CLEC4M	0.240083	0.589771	-0.349689	0.217133	0.463533	-0.2464	0.308613	0.76405	-0.455437	0.308613	0.76405	-0.455437	0.221421	0.748281	-0.52686	0.236144	0.897652	-0.661507	0	No	No	6
CLEC5A	#N/A	#N/A	#N/A	#N/A	#N/A	#N/A	0.230211	0.921742	-0.691531	0.15656	0.89248	-0.73592	0.296012	0.799749	-0.503737	0.304228	0.925634	-0.621406	0	No	No	4
CLEC7A	0.227002	0.769298	-0.542296	0.600778	0.929707	-0.328929	#N/A	#N/A	#N/A	0.336692	0.86609	-0.529398	0.343613	0.677973	-0.33436	0.525199	0.911826	-0.386626	0	No	No	5
CLEC9A	0.499532	0.780154	-0.280622	0.733485	0.932649	-0.199164	0.797999	0.958801	-0.160802	0.797999	0.958801	-0.160802	0.818175	0.79475	0.0234245	0.569371	0.848277	-0.278907	0	No	No	2
CLECL1	0.514189	0.919915	-0.405726	0.392139	0.568507	-0.176368	#N/A	#N/A	#N/A	0.760843	0.894722	-0.133879	#N/A	#N/A	#N/A	#N/A	#N/A	#N/A	0	No	No	1
CLIC2	0.0723462	0.34688	-0.274534	#N/A	#N/A	#N/A	0.101092	0.370382	-0.26929	0.101092	0.370382	-0.26929	0.585468	0.756668	-0.1712	#N/A	#N/A	#N/A	0	No	No	3
CLIC6	0.827313	0.680965	0.146348	0.562545	0.153801	0.408745	#N/A	#N/A	#N/A	0.094349	0.113234	-0.0188852	0.397597	0.432294	-0.0346967	0.463808	0.460629	0.00317887	1	No	No	0
CLK2P	0.700491	0.904779	-0.204287	0.373622	0.696535	-0.322913	#N/A	#N/A	#N/A	#N/A	#N/A	#N/A	0.736707	0.851248	-0.11454	#N/A	#N/A	#N/A	0	No	No	2
CLLU1	0.824321	0.906296	-0.0819749	#N/A	#N/A	#N/A	0.552759	0.840918	-0.288159	0.552759	0.840918	-0.288159	0.783412	0.888306	-0.104893	0.837317	0.88796	-0.0506434	0	No	No	2
CLNK	0.39871	0.79941	-0.4007	0.365404	0.726244	-0.36084	0.536049	0.793827	-0.257778	0.666796	0.908825	-0.242029	0.403991	0.647236	-0.243245	#N/A	#N/A	#N/A	0	No	No	5
CLPS	0.634807	0.760552	-0.125746	0.475644	0.622334	-0.146691	0.704788	0.69974	0.00504833	0.704788	0.69974	0.00504833	0.543096	0.78548	-0.242384	0.869724	0.921982	-0.0522582	0	No	No	1
CLRN1	0.441812	0.850144	-0.408331	0.655035	0.851139	-0.196104	0.465339	0.76296	-0.29762	0.597484	0.780546	-0.183063	0.47135	0.832324	-0.360974	0.683353	0.920692	-0.237339	0	No	No	4
CLRN1OS	0.770458	0.898937	-0.128479	0.659483	0.773466	-0.113983	#N/A	#N/A	#N/A	#N/A	#N/A	#N/A	0.486282	0.743041	-0.256759	#N/A	#N/A	#N/A	0	No	No	1
CLRN3	0.517739	0.896653	-0.378913	#N/A	#N/A	#N/A	#N/A	#N/A	#N/A	0.552032	0.941761	-0.389729	0.489315	0.755922	-0.266607	0.278425	0.709184	-0.430759	0	No	No	4
CLSTN2	0.474129	0.219784	0.254344	0.094001	0.0526794	0.0413216	#N/A	#N/A	#N/A	0.0176572	0.0145656	0.00309164	0.390669	0.652668	-0.261999	0.841594	0.929238	-0.0876435	1	Yes	No	1
CLUAP1	0.61451	0.527192	0.0873184	0.0203609	0.0301357	-0.00977483	0.305564	0.300434	0.00513044	0.00694846	0.00691209	3.6365e-05	0.511237	0.521319	-0.0100821	0.82057	0.590755	0.229816	1	No	No	0
CLVS1	0.0789295	0.49899	-0.420061	0.0966231	0.090522	0.00610108	0.121919	0.487446	-0.365527	0.0641986	0.0944277	-0.0302291	0.121779	0.504247	-0.382468	0.843453	0.769256	0.0741966	0	No	No	3
CLVS2	0.0917594	0.115013	-0.0232541	0.04782	0.0863966	-0.0385766	0.0898608	0.131501	-0.0416398	0.0514954	0.0978113	-0.046316	0.567404	0.781625	-0.214221	0.267018	0.750576	-0.483558	0	No	No	2
CMA1	0.13745	0.636196	-0.498746	#N/A	#N/A	#N/A	#N/A	#N/A	#N/A	#N/A	#N/A	#N/A	0.237187	0.85125	-0.614063	#N/A	#N/A	#N/A	0	No	No	2
CMPK2	0.0603092	0.074871	-0.0145618	0.0608562	0.0908667	-0.0300104	0.0316227	0.051312	-0.0196893	0.0530653	0.076878	-0.0238126	0.829535	0.885277	-0.0557417	0.729947	0.943082	-0.213135	0	No	No	1
CMTM1	0.972653	0.957349	0.0153036	0.97127	0.932983	0.0382873	0.962778	0.953535	0.00924242	0.930767	0.882594	0.0481736	0.889118	0.832727	0.0563907	0.367699	0.141656	0.226043	1	No	No	0
CMTM2	0.39663	0.185668	0.210961	0.75649	0.276875	0.479615	0.734723	0.539884	0.194839	0.811537	0.662376	0.149161	0.859781	0.910278	-0.0504969	#N/A	#N/A	#N/A	2	No	No	0
CMTM5	0.707391	0.843686	-0.136295	0.305218	0.362187	-0.0569688	0.434209	0.411915	0.0222939	0.456814	0.384342	0.0724723	0.367909	0.437848	-0.0699386	0.567691	0.886547	-0.318856	0	No	No	1
CNBD1	0.539106	0.78707	-0.247964	0.559705	0.919688	-0.359983	#N/A	#N/A	#N/A	0.575324	0.868788	-0.293463	0.569901	0.766622	-0.196722	#N/A	#N/A	#N/A	0	No	No	3
CNDP1	0.838183	0.916524	-0.0783403	0.80023	0.82539	-0.0251601	0.805573	0.877151	-0.0715772	0.805573	0.877151	-0.0715772	0.567744	0.906314	-0.33857	0.431353	0.730288	-0.298935	0	No	No	2
CNGA1	0.287387	0.770059	-0.482672	0.603479	0.942285	-0.338806	0.336738	0.859558	-0.522819	#N/A	#N/A	#N/A	0.403845	0.791453	-0.387608	0.595701	0.898627	-0.302926	0	No	No	5
CNGA2	0.193824	0.353679	-0.159854	0.244731	0.530633	-0.285902	0.301615	0.621058	-0.319443	0.231496	0.56942	-0.337924	0.316616	0.639403	-0.322787	0.598954	0.919544	-0.320591	0	No	No	5
CNGA3	0.472108	0.732532	-0.260424	0.187223	0.460032	-0.272808	0.241546	0.20466	0.0368861	0.0748705	0.0998275	-0.024957	0.645512	0.779217	-0.133705	0.813795	0.901438	-0.0876431	0	No	No	2
CNGA4	0.510305	0.802105	-0.2918	0.769566	0.848837	-0.0792708	#N/A	#N/A	#N/A	#N/A	#N/A	#N/A	0.666527	0.834952	-0.168425	#N/A	#N/A	#N/A	0	No	No	1
CNGB3	0.236764	0.348077	-0.111313	#N/A	#N/A	#N/A	#N/A	#N/A	#N/A	0.330034	0.668957	-0.338922	0.554171	0.88727	-0.333099	0.802819	0.936612	-0.133792	0	No	No	2
CNIH4	0.355534	0.633587	-0.278053	0.0532004	0.0641308	-0.0109304	0.0164416	0.0483896	-0.031948	0.0164416	0.0483896	-0.031948	0.161708	0.170422	-0.00871428	#N/A	#N/A	#N/A	0	No	No	1
CNKSR1	0.854468	0.672143	0.182326	0.912411	0.71662	0.195791	0.820625	0.427985	0.39264	0.820625	0.427985	0.39264	0.786301	0.636929	0.149373	#N/A	#N/A	#N/A	2	No	No	0
CNKSR2	0.251462	0.392701	-0.14124	#N/A	#N/A	#N/A	0.462351	0.440537	0.0218135	0.462351	0.440537	0.0218135	0.292617	0.47348	-0.180863	0.660634	0.902469	-0.241835	0	No	No	1
CNNM3	0.0466893	0.0513181	-0.00462885	0.00725625	0.0182691	-0.0110129	#N/A	#N/A	#N/A	0.0380846	0.049911	-0.0118264	0.860521	0.722252	0.138269	0.833643	0.544791	0.288852	1	No	No	0
CNO	0.37017	0.646679	-0.276509	0.0164944	0.0260397	-0.00954529	#N/A	#N/A	#N/A	0.0289941	0.0328041	-0.00380999	#N/A	#N/A	#N/A	0.0564614	0.0618121	-0.00535069	0	No	No	1
CNPY1	0.175338	0.259066	-0.0837276	0.0552713	0.0770379	-0.0217667	0.140087	0.240242	-0.100155	0.0572061	0.0620836	-0.00487753	0.161395	0.36775	-0.206355	0.128319	0.322563	-0.194244	0	No	No	1
CNPY2	0.366397	0.40055	-0.0341532	0.0443614	0.0422557	0.00210575	0.0590946	0.0669566	-0.00786205	0.0561478	0.0627093	-0.00656151	0.37232	0.769591	-0.397271	#N/A	#N/A	#N/A	0	No	No	1
CNR1	0.382807	0.581181	-0.198375	0.108868	0.229393	-0.120524	0.336656	0.633476	-0.296819	0.31272	0.426281	-0.113561	0.537325	0.876249	-0.338923	0.486696	0.867139	-0.380442	0	No	No	3
CNR2	0.419901	0.719405	-0.299504	0.595619	0.713581	-0.117962	0.444343	0.481379	-0.0370351	0.872632	0.850133	0.0224989	0.253759	0.807803	-0.554044	0.371005	0.799608	-0.428603	0	No	No	3
CNTD2	0.248217	0.518148	-0.269931	0.12845	0.229833	-0.101383	#N/A	#N/A	#N/A	0.0446796	0.0653267	-0.0206471	0.25309	0.326613	-0.0735237	0.768694	0.808317	-0.039623	0	No	No	1
CNTF	0.896166	0.87326	0.0229062	0.720111	0.670048	0.0500622	#N/A	#N/A	#N/A	0.961669	0.961427	0.000242633	0.926721	0.918584	0.00813723	0.581453	0.861549	-0.280096	0	No	No	1
CNTN2	0.223934	0.459285	-0.235352	0.0667255	0.173144	-0.106418	0.124744	0.272838	-0.148094	0.0138064	0.0282228	-0.0144164	0.522431	0.698913	-0.176482	0.694276	0.948848	-0.254573	0	No	No	2
CNTN4	0.320041	0.388354	-0.0683128	0.715609	0.909408	-0.193799	0.518446	0.7273	-0.208854	0.68467	0.915719	-0.231049	0.605608	0.742951	-0.137343	#N/A	#N/A	#N/A	0	Yes	No	2
CNTN5	0.0850199	0.0930073	-0.00798735	0.0324841	0.0496477	-0.0171636	0.435296	0.624454	-0.189158	#N/A	#N/A	#N/A	0.377987	0.632677	-0.25469	0.524592	0.917549	-0.392958	0	No	No	2
CNTN6	0.625902	0.746461	-0.120558	0.260934	0.23387	0.0270639	0.508916	0.568935	-0.0600183	0.38754	0.381149	0.00639145	0.599175	0.800692	-0.201517	#N/A	#N/A	#N/A	0	No	No	1
CNTNAP2	0.0646942	0.0905938	-0.0258996	0.106428	0.0862021	0.0202262	0.0433453	0.0715545	-0.0282092	0.0517853	0.0771505	-0.0253652	0.458346	0.599348	-0.141002	0.622377	0.891963	-0.269586	0	Yes	No	1
CNTNAP4	0.395946	0.773533	-0.377587	0.343503	0.472741	-0.129237	0.00289064	0.00944094	-0.0065503	0.00289064	0.00944094	-0.0065503	0.427612	0.825899	-0.398287	#N/A	#N/A	#N/A	0	No	No	2
CNTNAP5	0.122887	0.135543	-0.0126551	0.107419	0.143446	-0.0360271	0.0844117	0.193921	-0.10951	0.0843886	0.166541	-0.0821519	0.347607	0.721455	-0.373849	0.403774	0.755195	-0.351421	0	No	No	2
CNTROB	0.106967	0.128421	-0.0214545	0.034428	0.039391	-0.004963	0.012711	0.0213423	-0.00863129	0.0587615	0.117706	-0.0589444	0.53656	0.771932	-0.235372	#N/A	#N/A	#N/A	0	No	No	1
COASY	0.246882	0.475605	-0.228723	0.0345798	0.0569604	-0.0223806	0.366433	0.389612	-0.023179	0.366433	0.389612	-0.023179	0.581978	0.59907	-0.0170921	0.812872	0.738441	0.0744312	0	No	No	1
COBL	0.450517	0.24611	0.204407	0.0647981	0.0386025	0.0261956	0.131055	0.012309	0.118746	0.131055	0.012309	0.118746	0.48267	0.715016	-0.232346	0.659603	0.88003	-0.220426	1	No	No	2
COG5	0.415819	0.727584	-0.311765	0.192681	0.287049	-0.0943674	0.021981	0.023547	-0.00156594	0.0296882	0.0308461	-0.00115788	0.662601	0.635639	0.0269614	0.705269	0.425539	0.27973	1	No	No	1
COL12A1	0.155567	0.125324	0.030243	0.0431654	0.0563536	-0.0131882	0.11862	0.197793	-0.0791729	#N/A	#N/A	#N/A	0.64941	0.653292	-0.00388168	0.851619	0.579316	0.272303	1	Yes	No	0
COL14A1	0.0726247	0.0970587	-0.024434	0.0203355	0.0312637	-0.0109282	0.277755	0.282939	-0.0051841	0.0905968	0.0877544	0.00284236	0.557064	0.603027	-0.0459629	0.698386	0.952849	-0.254463	0	Yes	No	1
COL17A1	0.612908	0.826106	-0.213199	0.580648	0.682798	-0.10215	0.774007	0.737491	0.0365163	#N/A	#N/A	#N/A	0.646661	0.689446	-0.0427852	0.950777	0.951761	-0.000984033	0	No	No	1
COL20A1	0.52507	0.654447	-0.129377	0.218747	0.246114	-0.0273672	0.617428	0.672236	-0.0548073	#N/A	#N/A	#N/A	0.432763	0.564687	-0.131924	0.637721	0.874681	-0.23696	0	No	No	1
COL21A1	0.532927	0.245691	0.287236	0.386424	0.0630116	0.323412	0.398132	0.0912764	0.306856	0.382565	0.0976783	0.284886	0.627785	0.742582	-0.114797	0.947445	0.956495	-0.00904953	4	No	No	0
COL22A1	0.115982	0.217279	-0.101297	0.06278	0.0628105	-3.04544e-05	0.252338	0.528862	-0.276524	0.0587766	0.0560897	0.00268694	0.406694	0.788663	-0.38197	0.286768	0.775958	-0.48919	0	No	No	3
COL29A1	0.455074	0.890592	-0.435518	0.0901193	0.127533	-0.0374132	0.134031	0.318856	-0.184825	0.0693168	0.0763709	-0.00705408	0.375707	0.620911	-0.245204	0.47689	0.830822	-0.353932	0	No	No	3
COL2A1	0.576045	0.464572	0.111473	0.0175328	0.0267914	-0.00925856	#N/A	#N/A	#N/A	0.0259595	0.0429551	-0.0169955	0.191696	0.209266	-0.0175705	0.492257	0.815066	-0.322809	0	Yes	No	1
COL3A1	0.208664	0.821755	-0.613091	0.220283	0.247791	-0.0275073	0.174456	0.205479	-0.0310231	0.174456	0.205479	-0.0310231	0.476617	0.554897	-0.0782795	#N/A	#N/A	#N/A	0	No	No	1
COL4A5	0.190674	0.328713	-0.138039	0.257045	0.333181	-0.0761365	0.098773	0.319393	-0.22062	0.117142	0.295935	-0.178793	0.576167	0.818137	-0.24197	0.487249	0.848944	-0.361696	0	Yes	No	3
COL4A6	0.167996	0.316132	-0.148136	0.152472	0.287445	-0.134973	0.22505	0.37979	-0.15474	0.22505	0.37979	-0.15474	0.285696	0.442646	-0.15695	0.663053	0.863437	-0.200384	0	Yes	No	1
COL5A3	0.541883	0.75314	-0.211257	0.0477121	0.064166	-0.0164539	#N/A	#N/A	#N/A	#N/A	#N/A	#N/A	0.482826	0.438389	0.0444375	0.949512	0.910946	0.0385655	0	No	No	1
COL6A3	0.861565	0.829879	0.0316857	0.248222	0.304522	-0.0562996	0.347626	0.376452	-0.0288259	0.17326	0.218924	-0.0456638	0.834878	0.788756	0.0461217	0.458245	0.696734	-0.238489	0	No	No	1
COL6A4P2	0.494148	0.836396	-0.342248	#N/A	#N/A	#N/A	#N/A	#N/A	#N/A	#N/A	#N/A	#N/A	0.604844	0.837942	-0.233098	#N/A	#N/A	#N/A	0	No	No	2
COL6A6	0.538773	0.882984	-0.34421	#N/A	#N/A	#N/A	#N/A	#N/A	#N/A	#N/A	#N/A	#N/A	0.776226	0.879991	-0.103765	0.750318	0.657344	0.0929745	0	No	No	1
COL9A1	0.452443	0.774285	-0.321841	0.439746	0.516099	-0.0763532	0.468236	0.608545	-0.140309	0.468236	0.608545	-0.140309	0.522794	0.626149	-0.103355	0.469999	0.906705	-0.436706	0	No	No	2
COL9A2	0.764199	0.470306	0.293893	0.409295	0.0707344	0.33856	0.268124	0.0184093	0.249715	0.268124	0.0184093	0.249715	0.449279	0.397469	0.0518105	0.851504	0.838999	0.0125048	4	Yes	No	0
COLEC10	0.612177	0.943367	-0.33119	#N/A	#N/A	#N/A	#N/A	#N/A	#N/A	0.530269	0.875112	-0.344842	0.374961	0.630389	-0.255428	0.125609	0.881359	-0.75575	0	No	No	4
COLEC11	0.74279	0.603952	0.138839	0.812432	0.388717	0.423715	0.771667	0.678485	0.093182	0.786997	0.277395	0.509602	0.707822	0.808169	-0.100347	#N/A	#N/A	#N/A	2	No	No	0
COMMD3	0.402394	0.402579	-0.000185022	0.00827955	0.0103082	-0.00202866	0.0654782	0.0716704	-0.00619216	0.0654782	0.0716704	-0.00619216	0.286884	0.411147	-0.124263	0.22071	0.438579	-0.21787	0	No	No	1
COMTD1	0.852026	0.92556	-0.073534	0.0492423	0.0780663	-0.0288239	0.0416257	0.0533378	-0.0117122	0.0416257	0.0533378	-0.0117122	0.28077	0.226489	0.0542808	0.706114	0.233689	0.472425	1	No	No	0
COPB1	0.0379449	0.0345888	0.00335609	0.0305391	0.0321978	-0.00165872	0.0410565	0.0490747	-0.00801815	0.0501913	0.0548654	-0.00467413	0.158415	0.853979	-0.695564	#N/A	#N/A	#N/A	0	No	No	1
COPS5	0.282257	0.814053	-0.531796	0.0444363	0.0419307	0.00250565	0.0434269	0.051695	-0.00826814	0.0460443	0.0532524	-0.00720808	0.750507	0.686978	0.0635292	#N/A	#N/A	#N/A	0	No	No	1
COQ3	0.191414	0.767501	-0.576087	0.0880834	0.18031	-0.0922268	#N/A	#N/A	#N/A	0.00631243	0.012446	-0.00613358	0.338085	0.336019	0.0020652	#N/A	#N/A	#N/A	0	No	No	1
CORIN	0.845154	0.661388	0.183766	0.323029	0.138886	0.184143	0.359524	0.122625	0.236899	0.359524	0.122625	0.236899	0.399395	0.531934	-0.132539	0.476493	0.535707	-0.0592137	2	No	No	0
CORO1C	0.296296	0.322327	-0.0260309	0.0156318	0.0186732	-0.00304145	0.264294	0.318817	-0.0545238	0.00629089	0.0129949	-0.00670401	0.696677	0.678336	0.0183402	0.579004	0.292213	0.286791	1	No	No	0
CORO2A	0.109662	0.112836	-0.00317365	#N/A	#N/A	#N/A	0.332677	0.55233	-0.219652	#N/A	#N/A	#N/A	0.372354	0.804014	-0.431661	0.272097	0.340808	-0.0687119	0	No	No	2
CORO6	0.138702	0.180155	-0.0414535	0.835723	0.841548	-0.0058255	#N/A	#N/A	#N/A	0.921609	0.910806	0.010803	0.630206	0.312331	0.317875	0.710976	0.646075	0.0649009	1	Yes	No	0
COX10	0.298248	0.61486	-0.316612	0.0255252	0.0306951	-0.00516986	0.00767915	0.0162436	-0.00856443	0.0409246	0.0440603	-0.00313574	0.730018	0.687024	0.0429942	0.901957	0.887597	0.0143597	0	No	No	1
COX19	0.323015	0.572464	-0.249449	0.0570721	0.108125	-0.0510527	0.00394126	0.00671855	-0.0027773	0.00394126	0.00671855	-0.0027773	0.493576	0.483894	0.00968193	0.721503	0.7321	-0.0105972	0	No	No	1
COX7B	0.257785	0.551981	-0.294196	0.177762	0.469247	-0.291485	0.168977	0.51584	-0.346864	0.168977	0.51584	-0.346864	0.128334	0.444977	-0.316643	#N/A	#N/A	#N/A	0	No	No	5
COX7B2	0.196694	0.859404	-0.662709	0.441498	0.909709	-0.468211	0.49369	0.880309	-0.386619	#N/A	#N/A	#N/A	#N/A	#N/A	#N/A	#N/A	#N/A	#N/A	0	No	No	3
COX8C	0.459355	0.927671	-0.468316	0.543079	0.936509	-0.39343	0.785047	0.916377	-0.131331	0.785047	0.916377	-0.131331	0.8949	0.952617	-0.0577166	0.233352	0.910683	-0.677331	0	No	No	3
CP110	0.30769	0.527954	-0.220264	0.0386215	0.0458592	-0.00723779	0.037754	0.045673	-0.00791894	0.0437495	0.0556598	-0.0119103	0.928567	0.908936	0.0196312	0.921951	0.921667	0.000284267	0	No	No	1
CPA3	0.782496	0.919689	-0.137193	#N/A	#N/A	#N/A	#N/A	#N/A	#N/A	0.748747	0.818722	-0.0699751	0.883416	0.930294	-0.0468775	0.566102	0.78722	-0.221119	0	No	No	1
CPA6	0.453509	0.85568	-0.402171	#N/A	#N/A	#N/A	0.305525	0.712326	-0.4068	0.0709097	0.211739	-0.14083	0.364397	0.758115	-0.393718	0.586561	0.928645	-0.342084	0	No	No	4
CPEB4	0.129606	0.441897	-0.31229	0.0345475	0.0436633	-0.00911577	0.0485421	0.0467964	0.00174567	0.123216	0.170039	-0.0468233	0.492312	0.587915	-0.0956028	0.927471	0.947112	-0.0196413	0	No	No	1
CPLX2	0.359376	0.715783	-0.356407	0.0777688	0.101126	-0.023357	0.149131	0.293402	-0.144272	0.04496	0.0321424	0.0128176	0.113839	0.135033	-0.0211937	0.293428	0.815724	-0.522296	0	No	No	2
CPN1	0.583518	0.730663	-0.147146	0.397132	0.643174	-0.246042	0.431639	0.665322	-0.233684	0.600746	0.832362	-0.231615	0.540496	0.671733	-0.131237	#N/A	#N/A	#N/A	0	No	No	3
CPNE4	0.185291	0.487617	-0.302326	0.0302742	0.0574843	-0.02721	0.316649	0.41636	-0.0997108	0.0536927	0.0616084	-0.00791565	0.66576	0.688835	-0.0230741	#N/A	#N/A	#N/A	0	No	No	1
CPNE7	0.301386	0.216756	0.0846303	0.0749661	0.0979333	-0.0229672	#N/A	#N/A	#N/A	0.115169	0.0113101	0.103859	0.6614	0.732306	-0.0709067	0.787942	0.575619	0.212323	1	Yes	No	0
CPO	0.64893	0.770635	-0.121705	0.618992	0.926735	-0.307743	#N/A	#N/A	#N/A	#N/A	#N/A	#N/A	0.210559	0.635114	-0.424556	#N/A	#N/A	#N/A	0	No	No	2
CPPED1	0.437845	0.883688	-0.445843	0.0397793	0.00838432	0.031395	0.0100454	0.0134392	-0.00339381	0.0100454	0.0134392	-0.00339381	0.419893	0.712952	-0.293058	0.443156	0.902391	-0.459234	0	No	No	3
CPS1	0.171186	0.283962	-0.112776	0.354279	0.796105	-0.441827	0.388755	0.843286	-0.454531	0.388755	0.843286	-0.454531	0.506779	0.752052	-0.245274	#N/A	#N/A	#N/A	0	No	No	4
CPSF4	0.290162	0.299283	-0.00912135	0.0104068	0.0146494	-0.00424265	0.0690123	0.0804683	-0.0114559	0.0549058	0.0663014	-0.0113956	0.544301	0.463528	0.0807738	0.855441	0.629907	0.225534	1	No	No	0
CPXCR1	0.494575	0.836682	-0.342107	0.369449	0.719783	-0.350335	0.275195	0.694945	-0.41975	0.220123	0.478627	-0.258505	#N/A	#N/A	#N/A	#N/A	#N/A	#N/A	0	No	No	4
CPXM2	0.44899	0.826638	-0.377649	0.179822	0.319466	-0.139644	0.137838	0.0418021	0.0960359	0.1647	0.115874	0.0488264	0.332069	0.774787	-0.442718	0.119768	0.476479	-0.356712	0	No	No	3
CPZ	0.432089	0.70866	-0.276571	0.0474653	0.0491324	-0.0016671	0.376534	0.505996	-0.129461	0.0306023	0.0296824	0.000919857	0.492302	0.69711	-0.204808	0.666281	0.971773	-0.305492	0	No	No	3
CR1	0.621615	0.631927	-0.0103121	0.503353	0.234154	0.269199	0.0271589	0.0268131	0.000345802	0.0423786	0.0366156	0.00576292	0.0867959	0.115283	-0.0284876	#N/A	#N/A	#N/A	1	No	No	0
CR2	0.568689	0.7673	-0.198611	0.0593467	0.0444494	0.0148973	#N/A	#N/A	#N/A	#N/A	#N/A	#N/A	0.211657	0.388094	-0.176437	0.440787	0.750887	-0.3101	0	No	No	1
CRABP1	0.527698	0.581448	-0.0537498	0.105711	0.0810346	0.0246766	0.08708	0.051835	0.035245	0.08708	0.051835	0.035245	0.228703	0.248984	-0.020281	0.390823	0.659687	-0.268865	0	Yes	No	1
CRADD	0.313846	0.638582	-0.324736	0.0445673	0.0531468	-0.00857951	0.0512219	0.0555126	-0.00429065	0.0642548	0.062071	0.00218387	0.445737	0.415617	0.0301199	0.939996	0.925181	0.0148153	0	No	No	1
CRB1	0.75063	0.487891	0.262738	0.500815	0.243665	0.25715	#N/A	#N/A	#N/A	#N/A	#N/A	#N/A	0.657473	0.851424	-0.193951	0.710583	0.914525	-0.203942	2	No	No	1
CRCP	0.414602	0.719239	-0.304637	0.0465917	0.0508073	-0.00421557	0.0386625	0.0507036	-0.0120411	0.0386625	0.0507036	-0.0120411	0.367781	0.33398	0.0338011	0.56444	0.466625	0.0978147	0	No	No	1
CRCT1	0.410858	0.884829	-0.47397	0.424572	0.720432	-0.29586	0.182913	0.300865	-0.117952	#N/A	#N/A	#N/A	0.0394288	0.0647115	-0.0252827	0.0946219	0.174752	-0.0801299	0	No	No	2
CREB3L2	0.0550472	0.0765476	-0.0215004	0.0595131	0.0661252	-0.00661205	0.0308904	0.0343973	-0.00350687	0.0308904	0.0343973	-0.00350687	0.561543	0.554949	0.00659427	0.454573	0.731804	-0.277231	0	No	No	1
CREB3L3	0.33471	0.363108	-0.0283986	0.086993	0.219251	-0.132258	0.1963	0.314334	-0.118034	0.1963	0.314334	-0.118034	0.337726	0.724262	-0.386536	0.097701	0.108042	-0.0103405	0	No	No	1
CREG2	0.0555196	0.0887361	-0.0332166	0.0503702	0.0339037	0.0164665	#N/A	#N/A	#N/A	0.0410548	0.0744077	-0.0333529	0.340477	0.323677	0.0168005	0.299226	0.60301	-0.303784	0	Yes	No	1
CRH	0.289157	0.826089	-0.536931	0.346205	0.590938	-0.244733	0.18726	0.0908548	0.0964048	0.43286	0.0842003	0.34866	0.0351472	0.0688147	-0.0336675	0.239247	0.170015	0.069232	1	No	No	2
CRHBP	0.543728	0.891862	-0.348135	0.793108	0.863997	-0.0708889	0.806027	0.524425	0.281603	0.806027	0.524425	0.281603	0.328073	0.352668	-0.0245955	0.94605	0.94003	0.00602057	2	Yes	No	1
CRHR1	0.159319	0.299025	-0.139706	#N/A	#N/A	#N/A	0.0226771	0.0442578	-0.0215807	0.0226771	0.0442578	-0.0215807	0.326865	0.533742	-0.206877	0.555024	0.850092	-0.295068	0	Yes	No	2
CRHR2	0.121345	0.160105	-0.0387598	0.0321678	0.0493047	-0.0171369	0.0304102	0.0139203	0.0164899	0.0558658	0.0546193	0.00124654	0.371033	0.618062	-0.247029	#N/A	#N/A	#N/A	0	No	No	1
CRIP1	0.367855	0.606243	-0.238388	0.309974	0.110565	0.19941	0.320474	0.0895278	0.230947	0.325736	0.0994785	0.226257	0.398563	0.30175	0.0968133	#N/A	#N/A	#N/A	2	Yes	No	1
CRISP1	#N/A	#N/A	#N/A	0.416422	0.873856	-0.457433	0.257714	0.874254	-0.616539	#N/A	#N/A	#N/A	0.0708037	0.0534605	0.0173432	#N/A	#N/A	#N/A	0	No	No	2
CRISP2	0.120332	0.323205	-0.202874	0.12749	0.275585	-0.148095	0.159432	0.357674	-0.198242	0.194296	0.355985	-0.161689	0.377111	0.869205	-0.492094	#N/A	#N/A	#N/A	0	No	No	2
CRISP3	#N/A	#N/A	#N/A	#N/A	#N/A	#N/A	0.255984	0.81274	-0.556756	#N/A	#N/A	#N/A	0.46675	0.898836	-0.432087	#N/A	#N/A	#N/A	0	No	No	2
CRNKL1	0.329473	0.772589	-0.443116	0.754078	0.908539	-0.154461	0.817509	0.935365	-0.117856	0.850203	0.933472	-0.0832684	0.104216	0.105934	-0.00171763	0.836894	0.413861	0.423033	1	No	No	1
CRNN	0.623686	0.903603	-0.279917	#N/A	#N/A	#N/A	0.567401	0.863644	-0.296243	#N/A	#N/A	#N/A	0.187376	0.33119	-0.143813	#N/A	#N/A	#N/A	0	No	No	2
CRP	0.312143	0.72884	-0.416697	0.477905	0.903555	-0.42565	0.452374	0.899801	-0.447427	0.452374	0.899801	-0.447427	0.418962	0.892628	-0.473665	0.154772	0.679462	-0.52469	0	No	No	6
CRTAM	0.756816	0.81151	-0.0546939	#N/A	#N/A	#N/A	#N/A	#N/A	#N/A	#N/A	#N/A	#N/A	0.678586	0.78203	-0.103443	0.570042	0.84593	-0.275888	0	No	No	1
CRTC2	0.163365	0.151206	0.0121586	0.0711789	0.0832786	-0.0120996	#N/A	#N/A	#N/A	0.0387631	0.0474582	-0.00869509	0.327704	0.2934	0.034304	0.726172	0.503895	0.222277	1	No	No	0
CRX	0.296331	0.6477	-0.351369	0.167527	0.182877	-0.0153496	0.134311	0.239975	-0.105664	0.0919962	0.156221	-0.0642251	0.621506	0.394289	0.227217	0.418639	0.683074	-0.264435	1	No	No	2
CRYAA	0.681281	0.73978	-0.058499	0.483749	0.748672	-0.264924	0.809974	0.882386	-0.0724128	0.77134	0.817825	-0.0464847	0.725888	0.86067	-0.134781	0.847754	0.727337	0.120417	0	No	No	1
CRYBA2	0.161619	0.0868201	0.0747988	0.0187716	0.0227235	-0.00395186	0.0554999	0.0688736	-0.0133738	0.0429807	0.0475162	-0.00453555	0.420699	0.195893	0.224806	#N/A	#N/A	#N/A	1	Yes	No	0
CRYBA4	0.771299	0.825927	-0.0546281	0.477627	0.686203	-0.208576	0.684669	0.906781	-0.222113	#N/A	#N/A	#N/A	0.594736	0.858711	-0.263975	0.880365	0.855382	0.0249833	0	No	No	3
CRYBB1	0.781836	0.863599	-0.0817638	0.567891	0.622847	-0.0549559	0.764604	0.798694	-0.0340901	0.630815	0.709483	-0.0786678	0.328424	0.543348	-0.214924	#N/A	#N/A	#N/A	0	No	No	1
CRYBB2	0.332707	0.900833	-0.568126	0.357297	0.750292	-0.392994	0.349814	0.762499	-0.412685	#N/A	#N/A	#N/A	0.32729	0.857321	-0.530031	#N/A	#N/A	#N/A	0	No	No	4
CRYBB3	0.463691	0.743161	-0.279469	0.365586	0.784267	-0.418681	0.316921	0.650996	-0.334074	0.204833	0.631876	-0.427043	0.700308	0.931146	-0.230838	0.48598	0.820331	-0.33435	0	No	No	6
CRYGA	0.62933	0.755636	-0.126305	0.524364	0.782729	-0.258365	#N/A	#N/A	#N/A	#N/A	#N/A	#N/A	0.925621	0.948356	-0.0227348	#N/A	#N/A	#N/A	0	No	No	1
CRYGB	0.664208	0.893625	-0.229417	0.613127	0.819815	-0.206688	#N/A	#N/A	#N/A	#N/A	#N/A	#N/A	0.856551	0.924222	-0.0676709	#N/A	#N/A	#N/A	0	No	No	2
CRYGD	0.471409	0.73928	-0.267871	0.251431	0.229856	0.0215752	0.282737	0.240185	0.0425514	0.282737	0.240185	0.0425514	0.692943	0.688083	0.00485991	#N/A	#N/A	#N/A	0	No	No	1
CRYGS	#N/A	#N/A	#N/A	0.525791	0.868439	-0.342648	#N/A	#N/A	#N/A	#N/A	#N/A	#N/A	0.459798	0.502434	-0.0426365	0.919152	0.904021	0.0151313	0	No	No	1
CRYM	0.24388	0.32856	-0.0846799	0.0192176	0.0310664	-0.0118488	0.19125	0.214286	-0.0230358	0.02499	0.0241412	0.000848722	0.289995	0.615835	-0.32584	#N/A	#N/A	#N/A	0	No	No	1
CSAG1	0.380107	0.694867	-0.31476	0.415268	0.852288	-0.437019	0.4016	0.801208	-0.399609	#N/A	#N/A	#N/A	0.585018	0.83189	-0.246872	0.563608	0.894342	-0.330734	0	No	No	5
CSDAP1	0.274165	0.504248	-0.230083	0.0340807	0.0824555	-0.0483748	#N/A	#N/A	#N/A	#N/A	#N/A	#N/A	0.276706	0.295161	-0.0184549	#N/A	#N/A	#N/A	0	No	No	1
CSF2RB	0.561414	0.761623	-0.200209	0.482654	0.504411	-0.0217568	0.657026	0.852212	-0.195186	#N/A	#N/A	#N/A	0.4688	0.672749	-0.203949	0.682432	0.887398	-0.204966	0	No	No	3
CSF3	0.459982	0.385785	0.0741968	0.843585	0.473473	0.370112	0.40188	0.376365	0.025515	0.40188	0.376365	0.025515	0.791679	0.77316	0.018519	0.48209	0.361983	0.120107	1	No	No	0
CSF3R	0.488447	0.749258	-0.260811	0.372975	0.410619	-0.037644	0.471139	0.507986	-0.036847	#N/A	#N/A	#N/A	0.539106	0.68727	-0.148165	0.861303	0.843442	0.0178608	0	No	No	1
CSH1	0.719996	0.755845	-0.0358487	#N/A	#N/A	#N/A	0.723262	0.822855	-0.0995931	0.723262	0.822855	-0.0995931	0.764642	0.849106	-0.0844643	0.578657	0.786327	-0.20767	0	No	No	1
CSMD1	0.108043	0.42981	-0.321767	0.0889832	0.0876242	0.00135899	0.044448	0.0477231	-0.00327513	0.044448	0.0477231	-0.00327513	0.340099	0.702918	-0.362819	0.565217	0.909695	-0.344478	0	Yes	No	3
CSMD2	0.137231	0.0775338	0.0596972	0.061166	0.0738501	-0.0126841	#N/A	#N/A	#N/A	0.12518	0.0794028	0.0457776	0.34042	0.571225	-0.230805	0.678602	0.875231	-0.196628	0	No	No	1
CSN1S1	#N/A	#N/A	#N/A	#N/A	#N/A	#N/A	0.425731	0.942491	-0.51676	#N/A	#N/A	#N/A	0.423829	0.879304	-0.455476	#N/A	#N/A	#N/A	0	No	No	2
CSN1S2B	0.415433	0.852779	-0.437346	#N/A	#N/A	#N/A	#N/A	#N/A	#N/A	#N/A	#N/A	#N/A	0.413322	0.78696	-0.373638	#N/A	#N/A	#N/A	0	No	No	2
CSN2	#N/A	#N/A	#N/A	#N/A	#N/A	#N/A	#N/A	#N/A	#N/A	0.299478	0.879544	-0.580066	0.398497	0.943148	-0.544651	#N/A	#N/A	#N/A	0	No	No	2
CSN3	#N/A	#N/A	#N/A	#N/A	#N/A	#N/A	0.44041	0.921098	-0.480687	0.44041	0.921098	-0.480687	0.451853	0.861864	-0.410011	#N/A	#N/A	#N/A	0	No	No	3
CSPG5	0.512331	0.379065	0.133266	0.0667049	0.0673527	-0.000647792	#N/A	#N/A	#N/A	0.00977618	0.0286399	-0.0188637	0.414976	0.474974	-0.0599979	0.319175	0.61653	-0.297355	0	No	No	1
CSPP1	0.282257	0.814053	-0.531796	0.0270005	0.0310289	-0.00402846	#N/A	#N/A	#N/A	0.0138201	0.0317895	-0.0179694	0.534123	0.536943	-0.00282025	#N/A	#N/A	#N/A	0	No	No	1
CSRP3	0.571881	0.855177	-0.283297	0.36594	0.680908	-0.314968	0.341076	0.650607	-0.309531	0.576253	0.892292	-0.316039	0.86871	0.896486	-0.0277763	#N/A	#N/A	#N/A	0	No	No	4
CST1	0.425023	0.906538	-0.481515	#N/A	#N/A	#N/A	#N/A	#N/A	#N/A	0.583282	0.877804	-0.294522	0.278461	0.640711	-0.36225	0.262229	0.296832	-0.0346035	0	No	No	3
CST11	0.604033	0.847604	-0.243571	0.220082	0.409006	-0.188923	#N/A	#N/A	#N/A	0.281041	0.647438	-0.366397	0.184528	0.472757	-0.288229	0.714966	0.929954	-0.214988	0	No	No	4
CST2	0.214491	0.712752	-0.498261	0.242225	0.559328	-0.317103	0.160911	0.291477	-0.130565	0.160911	0.291477	-0.130565	0.409568	0.912303	-0.502735	#N/A	#N/A	#N/A	0	No	No	3
CST3	0.875713	0.842312	0.0334004	0.00963766	0.0201174	-0.0104797	0.000832543	0.00940201	-0.00856947	0.0220414	0.0364322	-0.0143907	0.348664	0.304426	0.044238	0.872977	0.574269	0.298708	1	No	No	0
CST4	0.241403	0.656173	-0.41477	#N/A	#N/A	#N/A	#N/A	#N/A	#N/A	0.513887	0.900547	-0.38666	0.452571	0.697673	-0.245103	0.197171	0.296328	-0.0991572	0	No	No	3
CST5	0.174023	0.326283	-0.15226	#N/A	#N/A	#N/A	#N/A	#N/A	#N/A	0.433735	0.872233	-0.438498	0.422507	0.856731	-0.434224	#N/A	#N/A	#N/A	0	No	No	2
CST6	0.573018	0.580028	-0.00700997	0.198112	0.166036	0.0320759	#N/A	#N/A	#N/A	0.181571	0.203148	-0.0215774	0.410216	0.734823	-0.324606	0.463417	0.581431	-0.118015	0	No	No	1
CST7	0.0487014	0.772196	-0.723495	0.103716	0.792295	-0.688579	0.325296	0.77034	-0.445044	0.325296	0.77034	-0.445044	0.74808	0.866074	-0.117994	0.860949	0.892184	-0.0312349	0	No	No	4
CST8	0.314503	0.799224	-0.484722	0.538634	0.875708	-0.337074	0.567506	0.894128	-0.326622	0.68163	0.911158	-0.229528	0.551979	0.914837	-0.362859	#N/A	#N/A	#N/A	0	No	No	5
CST9	0.0658134	0.204946	-0.139132	0.868292	0.848509	0.0197828	0.202463	0.512043	-0.30958	0.202463	0.512043	-0.30958	0.595679	0.89742	-0.30174	0.352602	0.74612	-0.393519	0	No	No	4
CST9L	0.14811	0.596368	-0.448258	0.315812	0.86238	-0.546569	0.334913	0.617708	-0.282795	0.253651	0.477431	-0.223779	0.200008	0.792915	-0.592908	0.176638	0.806583	-0.629945	0	No	No	6
CSTA	0.610841	0.851346	-0.240504	0.117827	0.460199	-0.342371	0.490324	0.881955	-0.391631	0.372671	0.828669	-0.455998	0.238724	0.885769	-0.647044	#N/A	#N/A	#N/A	0	No	No	5
CSTF2	0.146527	0.400518	-0.253991	0.132044	0.354081	-0.222037	0.273308	0.425113	-0.151805	0.273308	0.425113	-0.151805	0.332209	0.478785	-0.146576	#N/A	#N/A	#N/A	0	No	No	2
CSTL1	0.443634	0.66696	-0.223326	0.720326	0.934809	-0.214483	0.492447	0.78974	-0.297294	0.492447	0.78974	-0.297294	0.6538	0.889637	-0.235836	#N/A	#N/A	#N/A	0	No	No	5
CSTT	0.379048	0.846395	-0.467346	0.290466	0.757185	-0.466719	#N/A	#N/A	#N/A	#N/A	#N/A	#N/A	0.391076	0.893827	-0.50275	#N/A	#N/A	#N/A	0	No	No	3
CT45A1	0.553678	0.894837	-0.341159	0.471421	0.71653	-0.245109	0.330365	0.778639	-0.448274	#N/A	#N/A	#N/A	0.51398	0.733378	-0.219398	#N/A	#N/A	#N/A	0	No	No	4
CT45A4	#N/A	#N/A	#N/A	#N/A	#N/A	#N/A	#N/A	#N/A	#N/A	#N/A	#N/A	#N/A	0.105891	0.336823	-0.230932	#N/A	#N/A	#N/A	0	No	No	1
CT45A6	0.594654	0.739834	-0.145181	0.177284	0.505565	-0.328281	0.498088	0.815473	-0.317385	0.498088	0.815473	-0.317385	#N/A	#N/A	#N/A	#N/A	#N/A	#N/A	0	No	No	3
CT47A1	0.612161	0.894284	-0.282123	#N/A	#N/A	#N/A	#N/A	#N/A	#N/A	#N/A	#N/A	#N/A	0.364476	0.730528	-0.366051	#N/A	#N/A	#N/A	0	No	No	2
CT47A10	#N/A	#N/A	#N/A	#N/A	#N/A	#N/A	#N/A	#N/A	#N/A	#N/A	#N/A	#N/A	0.364476	0.730528	-0.366051	#N/A	#N/A	#N/A	0	No	No	1
CT47A11	#N/A	#N/A	#N/A	#N/A	#N/A	#N/A	#N/A	#N/A	#N/A	#N/A	#N/A	#N/A	0.364476	0.730528	-0.366051	#N/A	#N/A	#N/A	0	No	No	1
CT47A2	#N/A	#N/A	#N/A	#N/A	#N/A	#N/A	#N/A	#N/A	#N/A	#N/A	#N/A	#N/A	0.364476	0.730528	-0.366051	#N/A	#N/A	#N/A	0	No	No	1
CT47A3	#N/A	#N/A	#N/A	#N/A	#N/A	#N/A	#N/A	#N/A	#N/A	#N/A	#N/A	#N/A	0.364476	0.730528	-0.366051	#N/A	#N/A	#N/A	0	No	No	1
CT47A4	#N/A	#N/A	#N/A	#N/A	#N/A	#N/A	#N/A	#N/A	#N/A	#N/A	#N/A	#N/A	0.364476	0.730528	-0.366051	#N/A	#N/A	#N/A	0	No	No	1
CT47A5	#N/A	#N/A	#N/A	#N/A	#N/A	#N/A	#N/A	#N/A	#N/A	#N/A	#N/A	#N/A	0.364476	0.730528	-0.366051	#N/A	#N/A	#N/A	0	No	No	1
CT47A6	0.612161	0.894284	-0.282123	#N/A	#N/A	#N/A	#N/A	#N/A	#N/A	#N/A	#N/A	#N/A	0.364476	0.730528	-0.366051	#N/A	#N/A	#N/A	0	No	No	2
CT47A8	#N/A	#N/A	#N/A	#N/A	#N/A	#N/A	#N/A	#N/A	#N/A	#N/A	#N/A	#N/A	0.364476	0.730528	-0.366051	#N/A	#N/A	#N/A	0	No	No	1
CT47A9	#N/A	#N/A	#N/A	#N/A	#N/A	#N/A	#N/A	#N/A	#N/A	#N/A	#N/A	#N/A	0.364476	0.730528	-0.366051	#N/A	#N/A	#N/A	0	No	No	1
CT47B1	#N/A	#N/A	#N/A	#N/A	#N/A	#N/A	#N/A	#N/A	#N/A	0.348136	0.829436	-0.481299	0.569902	0.917532	-0.34763	0.526449	0.801572	-0.275123	0	No	No	3
CTAG2	0.659465	0.782319	-0.122854	0.707909	0.964071	-0.256161	#N/A	#N/A	#N/A	0.756378	0.959116	-0.202737	0.466841	0.873525	-0.406684	0.751386	0.85397	-0.102584	0	No	No	3
CTAGE1	0.688603	0.829963	-0.14136	0.911216	0.827998	0.0832177	0.801558	0.794057	0.00750078	0.675429	0.784658	-0.109229	#N/A	#N/A	#N/A	0.423172	0.76586	-0.342688	0	No	No	1
CTAGE6	#N/A	#N/A	#N/A	#N/A	#N/A	#N/A	#N/A	#N/A	#N/A	0.393142	0.674505	-0.281364	#N/A	#N/A	#N/A	#N/A	#N/A	#N/A	0	No	No	1
CTBP2	0.131764	0.15189	-0.0201263	0.0402203	0.0527487	-0.0125285	0.641753	0.559461	0.0822926	0.71337	0.739847	-0.0264765	0.788805	0.759431	0.029374	0.425405	0.683384	-0.257979	0	No	No	1
CTBS	0.368126	0.603179	-0.235052	0.0415008	0.0682404	-0.0267396	0.100024	0.130585	-0.0305611	0.0759471	0.102055	-0.026108	0.249228	0.314196	-0.0649682	#N/A	#N/A	#N/A	0	No	No	1
CTDSP1	0.0494046	0.0519164	-0.00251183	0.0334049	0.0442863	-0.0108814	0.0514156	0.0595318	-0.00811622	0.0514156	0.0595318	-0.00811622	0.628582	0.406305	0.222277	0.07143	0.0586469	0.0127831	1	No	No	0
CTLA4	0.735789	0.874213	-0.138424	0.548707	0.94744	-0.398733	#N/A	#N/A	#N/A	0.760191	0.884911	-0.12472	0.726044	0.898208	-0.172164	0.899063	0.958064	-0.0590011	0	No	No	1
CTNNA2	0.17416	0.148629	0.0255307	0.0567056	0.0683898	-0.0116842	0.24378	0.392346	-0.148566	0.0884644	0.0660035	0.0224608	0.350524	0.581455	-0.230931	0.377856	0.88527	-0.507414	0	No	No	2
CTNNA3	0.450409	0.6629	-0.212491	0.0955209	0.145221	-0.0497003	0.549064	0.705708	-0.156644	0.151468	0.234692	-0.0832234	0.45411	0.568836	-0.114726	0.687612	0.848014	-0.160402	0	No	No	1
CTNND2	0.122489	0.0767658	0.0457234	0.0268778	0.0191658	0.00771206	0.0988803	0.111191	-0.0123111	0.0988803	0.111191	-0.0123111	0.355248	0.567722	-0.212474	0.633326	0.946543	-0.313217	0	Yes	No	2
CTR9	0.0396468	0.0404284	-0.000781644	0.00271555	0.00405809	-0.00134254	0.0555381	0.0444232	0.0111149	0.0555381	0.0444232	0.0111149	0.343688	0.408702	-0.0650133	0.467248	0.672009	-0.204761	0	No	No	1
CTRB1	0.770773	0.803319	-0.0325465	0.823862	0.875482	-0.0516202	#N/A	#N/A	#N/A	#N/A	#N/A	#N/A	0.714451	0.819143	-0.104692	0.345451	0.680779	-0.335329	0	No	No	1
CTRL	0.80172	0.744709	0.057011	0.759412	0.52062	0.238792	0.544836	0.504561	0.0402751	0.544836	0.504561	0.0402751	0.912673	0.890336	0.0223368	0.866088	0.799835	0.0662538	1	No	No	0
CTSF	0.554202	0.605669	-0.0514665	0.0538584	0.0896447	-0.0357863	0.0116693	0.0132613	-0.00159203	0.0116693	0.0132613	-0.00159203	0.525389	0.536949	-0.0115604	0.530162	0.765614	-0.235452	0	No	No	1
CTSG	0.571585	0.83669	-0.265105	0.112219	0.65566	-0.543441	#N/A	#N/A	#N/A	#N/A	#N/A	#N/A	0.241914	0.737667	-0.495753	0.102191	0.292158	-0.189966	0	No	No	3
CTSL2	#N/A	#N/A	#N/A	0.067216	0.0656194	0.00159658	0.0954007	0.127038	-0.0316369	0.0486774	0.0610665	-0.0123891	0.587756	0.83039	-0.242634	#N/A	#N/A	#N/A	0	No	No	1
CTSL3	0.156651	0.381776	-0.225125	0.677337	0.923102	-0.245764	#N/A	#N/A	#N/A	#N/A	#N/A	#N/A	0.657697	0.828406	-0.170709	#N/A	#N/A	#N/A	0	No	No	2
CTSO	0.39329	0.679374	-0.286084	0.056602	0.0594127	-0.00281073	#N/A	#N/A	#N/A	#N/A	#N/A	#N/A	0.0339059	0.036877	-0.00297118	0.888838	0.946843	-0.0580051	0	No	No	1
CTSS	0.913627	0.931187	-0.0175603	#N/A	#N/A	#N/A	0.184866	0.117542	0.0673242	0.281166	0.0788137	0.202353	0.640704	0.863179	-0.222476	0.895334	0.839205	0.0561288	1	No	No	1
CTXN2	0.0579418	0.0612013	-0.00325941	0.123866	0.0322218	0.0916441	0.119896	0.144643	-0.0247466	0.123721	0.153918	-0.0301966	0.614411	0.926772	-0.312361	0.5273	0.9273	-0.4	0	No	No	2
CTXN3	0.615009	0.771205	-0.156196	0.561303	0.771941	-0.210638	0.590178	0.719398	-0.12922	0.644761	0.782061	-0.1373	0.702048	0.847138	-0.145091	#N/A	#N/A	#N/A	0	No	No	1
CUGBP1	0.482835	0.465938	0.0168979	0.815368	0.713125	0.102243	0.558517	0.505822	0.0526959	0.433617	0.389891	0.0437262	0.566668	0.47814	0.0885276	0.904397	0.636365	0.268031	1	No	No	0
CUL4B	0.452689	0.612995	-0.160306	0.221338	0.392452	-0.171114	0.314643	0.538634	-0.223991	0.314643	0.538634	-0.223991	0.224411	0.409958	-0.185547	0.797283	0.868086	-0.0708036	0	No	No	2
CUL9	0.372873	0.476924	-0.104051	0.00300662	0.00466312	-0.0016565	0.11684	0.134855	-0.0180153	0.11684	0.134855	-0.0180153	0.881592	0.864614	0.0169788	0.456641	0.255641	0.201	1	No	No	0
CUZD1	0.57795	0.821785	-0.243835	#N/A	#N/A	#N/A	0.331874	0.695545	-0.363671	0.331874	0.695545	-0.363671	0.431383	0.82364	-0.392258	0.325098	0.770685	-0.445587	0	No	No	5
CWH43	0.381107	0.354014	0.0270921	0.0560442	0.05444	0.00160424	0.148061	0.0790191	0.0690415	0.148061	0.0790191	0.0690415	0.324653	0.68056	-0.355906	#N/A	#N/A	#N/A	0	No	No	1
CXADR	0.108459	0.195594	-0.0871358	0.077936	0.0478138	0.0301222	#N/A	#N/A	#N/A	#N/A	#N/A	#N/A	0.318322	0.348691	-0.0303692	0.291508	0.545801	-0.254293	0	No	No	1
CXADRP2	0.0858936	0.491978	-0.406084	#N/A	#N/A	#N/A	#N/A	#N/A	#N/A	#N/A	#N/A	#N/A	0.222663	0.604096	-0.381434	#N/A	#N/A	#N/A	0	No	No	2
CXADRP3	0.362054	0.881033	-0.518979	#N/A	#N/A	#N/A	#N/A	#N/A	#N/A	#N/A	#N/A	#N/A	0.394467	0.785034	-0.390567	#N/A	#N/A	#N/A	0	No	No	2
CXCL10	0.619262	0.662091	-0.0428295	0.161944	0.178647	-0.0167024	#N/A	#N/A	#N/A	#N/A	#N/A	#N/A	0.84569	0.939353	-0.0936627	0.283732	0.879847	-0.596115	0	No	No	1
CXCL13	0.63983	0.874799	-0.234969	0.699997	0.879906	-0.179909	0.720704	0.841676	-0.120972	#N/A	#N/A	#N/A	0.623208	0.835464	-0.212256	0.612186	0.466918	0.145269	0	No	No	2
CXCL17	0.495198	0.698643	-0.203445	0.857857	0.878814	-0.0209565	0.890963	0.884056	0.00690718	0.890963	0.884056	0.00690718	0.0311179	0.125128	-0.0940105	0.563599	0.621635	-0.0580361	0	No	No	1
CXCL2	0.233872	0.26888	-0.0350083	0.0356186	0.0517741	-0.0161555	0.0675467	0.0762366	-0.00868994	0.0675467	0.0762366	-0.00868994	0.452937	0.405994	0.0469426	0.663488	0.882816	-0.219328	0	No	No	1
CXCL3	0.0472654	0.046858	0.000407448	0.0464729	0.0475402	-0.00106723	0.0755793	0.112462	-0.0368829	0.0755793	0.112462	-0.0368829	0.219823	0.388103	-0.16828	0.701867	0.922194	-0.220327	0	No	No	1
CXCL5	0.566824	0.732948	-0.166124	0.293999	0.131402	0.162597	0.0523443	0.0349223	0.017422	0.071705	0.0647089	0.00699605	0.0744713	0.0409252	0.0335461	0.698699	0.899531	-0.200832	0	No	No	1
CXCL9	#N/A	#N/A	#N/A	#N/A	#N/A	#N/A	#N/A	#N/A	#N/A	#N/A	#N/A	#N/A	0.238126	0.626142	-0.388016	0.57987	0.593745	-0.0138745	0	No	No	1
CXCR1	0.629179	0.774614	-0.145435	0.400695	0.569009	-0.168314	0.52725	0.819807	-0.292557	0.77493	0.888878	-0.113948	0.612426	0.857205	-0.244779	0.398746	0.587301	-0.188555	0	No	No	2
CXCR2	0.604947	0.739734	-0.134787	0.392366	0.621129	-0.228764	0.576136	0.793076	-0.21694	0.601852	0.765899	-0.164047	0.776903	0.813166	-0.0362623	0.14271	0.243037	-0.100326	0	No	No	2
CXCR4	0.0709536	0.0598812	0.0110723	0.0365564	0.0327003	0.00385604	0.117726	0.107678	0.0100481	0.178759	0.486208	-0.307449	0.139286	0.151035	-0.0117496	0.101876	0.847421	-0.745545	0	Yes	No	2
CXCR6	0.662381	0.867549	-0.205168	0.743565	0.910384	-0.166819	0.541564	0.667508	-0.125944	#N/A	#N/A	#N/A	#N/A	#N/A	#N/A	0.59299	0.46821	0.12478	0	No	No	1
CXCR7	0.077651	0.140778	-0.0631267	#N/A	#N/A	#N/A	0.466217	0.451193	0.0150237	0.110984	0.0582296	0.0527547	0.934737	0.961495	-0.0267582	0.569715	0.924226	-0.35451	0	No	No	1
CXorf1	#N/A	#N/A	#N/A	#N/A	#N/A	#N/A	#N/A	#N/A	#N/A	0.224499	0.476198	-0.251699	#N/A	#N/A	#N/A	#N/A	#N/A	#N/A	0	No	No	1
CXorf21	0.741745	0.920335	-0.17859	#N/A	#N/A	#N/A	0.53685	0.689232	-0.152382	#N/A	#N/A	#N/A	#N/A	#N/A	#N/A	0.440753	0.686928	-0.246174	0	No	No	1
CXorf22	0.163373	0.617394	-0.454021	0.0946025	0.22019	-0.125588	0.092513	0.325139	-0.232626	0.13251	0.401101	-0.268591	#N/A	#N/A	#N/A	#N/A	#N/A	#N/A	0	No	No	3
CXorf26	0.335746	0.617362	-0.281616	0.0725101	0.331364	-0.258854	0.263802	0.400446	-0.136643	0.263802	0.400446	-0.136643	0.120223	0.367824	-0.247601	0.546697	0.746912	-0.200215	0	No	No	4
CXorf30	0.432879	0.673772	-0.240893	#N/A	#N/A	#N/A	0.557153	0.875586	-0.318433	#N/A	#N/A	#N/A	#N/A	#N/A	#N/A	#N/A	#N/A	#N/A	0	No	No	2
CXorf36	0.425592	0.596772	-0.17118	0.739	0.729635	0.00936493	0.207427	0.234828	-0.0274013	0.517776	0.5658	-0.0480244	0.661279	0.732418	-0.0711389	0.464102	0.706073	-0.241971	0	No	No	1
CXorf39	0.137127	0.389285	-0.252157	0.235368	0.489469	-0.254101	0.14942	0.384362	-0.234942	0.14942	0.384362	-0.234942	0.354204	0.432197	-0.0779927	#N/A	#N/A	#N/A	0	No	No	4
CXorf40B	0.253441	0.473799	-0.220358	0.37677	0.360294	0.0164762	0.366434	0.464275	-0.0978407	0.319601	0.388296	-0.068695	0.538016	0.508431	0.0295845	#N/A	#N/A	#N/A	0	No	No	1
CXorf41	0.318811	0.424154	-0.105344	0.352183	0.406204	-0.0540207	0.164879	0.434388	-0.269509	0.128728	0.41195	-0.283221	#N/A	#N/A	#N/A	#N/A	#N/A	#N/A	0	No	No	2
CXorf42	0.331437	0.562618	-0.23118	0.155975	0.349401	-0.193426	#N/A	#N/A	#N/A	#N/A	#N/A	#N/A	0.347663	0.511953	-0.16429	#N/A	#N/A	#N/A	0	No	No	1
CXorf48	0.269932	0.647301	-0.377369	0.549278	0.929019	-0.379741	0.404396	0.750138	-0.345742	0.404396	0.750138	-0.345742	0.259895	0.678154	-0.418259	#N/A	#N/A	#N/A	0	No	No	5
CXorf56	0.369661	0.827286	-0.457625	0.151232	0.45383	-0.302598	0.171002	0.385427	-0.214425	0.171002	0.385427	-0.214425	0.524071	0.711285	-0.187214	0.753319	0.830843	-0.0775235	0	No	No	4
CXorf57	0.0942822	0.216017	-0.121735	0.160708	0.352807	-0.192099	0.124438	0.310379	-0.185941	0.137166	0.349391	-0.212225	0.786166	0.891041	-0.104875	#N/A	#N/A	#N/A	0	No	No	1
CXorf59	#N/A	#N/A	#N/A	#N/A	#N/A	#N/A	0.4074	0.80647	-0.39907	#N/A	#N/A	#N/A	#N/A	#N/A	#N/A	0.615047	0.888032	-0.272985	0	No	No	2
CXorf61	0.35087	0.579582	-0.228712	0.540453	0.781102	-0.240649	0.434235	0.83057	-0.396335	0.434235	0.83057	-0.396335	#N/A	#N/A	#N/A	#N/A	#N/A	#N/A	0	No	No	4
CXorf64	0.50939	0.716811	-0.20742	#N/A	#N/A	#N/A	#N/A	#N/A	#N/A	0.105266	0.156368	-0.0511021	0.274648	0.53162	-0.256972	#N/A	#N/A	#N/A	0	No	No	2
CXorf65	0.419526	0.585734	-0.166208	#N/A	#N/A	#N/A	0.519859	0.779059	-0.2592	0.519859	0.779059	-0.2592	0.450959	0.612155	-0.161196	0.47123	0.468107	0.0031236	0	No	No	2
CXorf66	#N/A	#N/A	#N/A	#N/A	#N/A	#N/A	#N/A	#N/A	#N/A	#N/A	#N/A	#N/A	0.390025	0.666267	-0.276242	#N/A	#N/A	#N/A	0	No	No	1
CXorf67	0.431115	0.852985	-0.42187	0.406918	0.730939	-0.324021	#N/A	#N/A	#N/A	0.518301	0.795022	-0.276721	#N/A	#N/A	#N/A	#N/A	#N/A	#N/A	0	No	No	3
CXXC4	0.0428537	0.0476331	-0.00477938	0.0361942	0.0499108	-0.0137166	#N/A	#N/A	#N/A	0.0526732	0.058648	-0.00597481	0.577559	0.838077	-0.260518	#N/A	#N/A	#N/A	0	No	No	1
CYB5R2	0.480596	0.195668	0.284929	#N/A	#N/A	#N/A	0.539003	0.619614	-0.0806115	0.0284991	0.0144153	0.0140838	0.634897	0.864727	-0.229831	0.515409	0.769574	-0.254164	1	No	No	2
CYBA	0.456691	0.305784	0.150907	0.229756	0.0603423	0.169414	0.203527	0.00550936	0.198017	0.229304	0.0289629	0.200341	0.696378	0.895811	-0.199433	#N/A	#N/A	#N/A	1	No	No	0
CYBRD1	0.716223	0.569537	0.146686	0.0406959	0.0490021	-0.0083062	0.0062897	0.0200329	-0.0137432	0.0251174	0.0386762	-0.0135587	0.206314	0.218801	-0.0124876	0.935571	0.731981	0.20359	1	No	No	0
CYFIP2	0.548319	0.560653	-0.0123345	0.191586	0.206488	-0.0149023	0.614185	0.647934	-0.0337484	0.143502	0.274458	-0.130956	0.570772	0.693502	-0.122729	0.68494	0.906762	-0.221821	0	No	No	1
CYLC2	#N/A	#N/A	#N/A	#N/A	#N/A	#N/A	#N/A	#N/A	#N/A	#N/A	#N/A	#N/A	0.466334	0.869029	-0.402695	#N/A	#N/A	#N/A	0	No	No	1
CYMP	0.555384	0.810491	-0.255107	0.369445	0.734275	-0.36483	#N/A	#N/A	#N/A	#N/A	#N/A	#N/A	0.447695	0.741346	-0.293651	#N/A	#N/A	#N/A	0	No	No	3
CYP11B1	#N/A	#N/A	#N/A	0.142802	0.572017	-0.429214	#N/A	#N/A	#N/A	0.304229	0.865195	-0.560966	0.263968	0.731053	-0.467085	0.201473	0.813729	-0.612256	0	No	No	4
CYP11B2	0.219148	0.857961	-0.638813	0.142142	0.639671	-0.497529	#N/A	#N/A	#N/A	0.221296	0.685761	-0.464465	0.139358	0.705716	-0.566358	0.0818961	0.449169	-0.367273	0	No	No	5
CYP1A1	0.129866	0.131303	-0.00143698	0.119466	0.120705	-0.00123876	0.21225	0.611604	-0.399354	#N/A	#N/A	#N/A	0.611418	0.771703	-0.160285	0.753441	0.89599	-0.142549	0	No	No	1
CYP1A2	0.532958	0.811364	-0.278405	0.753846	0.846641	-0.092795	0.206228	0.821474	-0.615246	#N/A	#N/A	#N/A	0.546144	0.650068	-0.103925	#N/A	#N/A	#N/A	0	No	No	2
CYP1B1	0.180064	0.175111	0.00495281	0.0361382	0.0441577	-0.0080195	0.305676	0.108853	0.196823	0.319725	0.111225	0.2085	0.609589	0.388957	0.220631	0.827571	0.695647	0.131924	2	Yes	No	0
CYP20A1	0.519578	0.658795	-0.139218	0.382907	0.711521	-0.328614	0.0502371	0.0672902	-0.0170532	0.0502371	0.0672902	-0.0170532	0.264781	0.275867	-0.0110853	0.622949	0.770329	-0.14738	0	No	No	1
CYP27B1	0.918754	0.915176	0.0035779	0.502417	0.67771	-0.175293	0.17037	0.207441	-0.0370708	0.17037	0.207441	-0.0370708	0.249317	0.218911	0.0304055	0.702535	0.91134	-0.208806	0	Yes	No	1
CYP2A13	0.202068	0.653187	-0.451119	#N/A	#N/A	#N/A	#N/A	#N/A	#N/A	#N/A	#N/A	#N/A	0.132696	0.256032	-0.123337	0.0404116	0.143591	-0.10318	0	No	No	1
CYP2A7	0.445984	0.771321	-0.325337	#N/A	#N/A	#N/A	0.364237	0.590066	-0.225828	0.364237	0.590066	-0.225828	0.346009	0.60428	-0.258271	#N/A	#N/A	#N/A	0	No	No	4
CYP2B6	0.367007	0.897916	-0.530909	#N/A	#N/A	#N/A	#N/A	#N/A	#N/A	0.285299	0.750835	-0.465536	0.283017	0.816333	-0.533317	0.251458	0.690511	-0.439053	0	No	No	4
CYP2B7P1	0.799467	0.893116	-0.0936492	0.554055	0.884527	-0.330472	#N/A	#N/A	#N/A	#N/A	#N/A	#N/A	0.487296	0.80637	-0.319074	#N/A	#N/A	#N/A	0	No	No	2
CYP2C18	0.407955	0.659591	-0.251636	0.29282	0.76369	-0.47087	0.406365	0.887776	-0.481411	0.406365	0.887776	-0.481411	0.212308	0.562523	-0.350216	#N/A	#N/A	#N/A	0	No	No	5
CYP2C19	0.180704	0.808309	-0.627606	0.122435	0.445139	-0.322704	#N/A	#N/A	#N/A	#N/A	#N/A	#N/A	0.298777	0.796145	-0.497368	#N/A	#N/A	#N/A	0	No	No	3
CYP2C8	0.71172	0.94038	-0.22866	#N/A	#N/A	#N/A	#N/A	#N/A	#N/A	#N/A	#N/A	#N/A	0.494221	0.896017	-0.401796	0.244063	0.751134	-0.507072	0	No	No	3
CYP2C9	0.155329	0.849767	-0.694438	0.132685	0.766439	-0.633754	#N/A	#N/A	#N/A	#N/A	#N/A	#N/A	0.145204	0.653807	-0.508603	0.14715	0.708777	-0.561627	0	No	No	4
CYP2D6	0.581767	0.761163	-0.179396	0.556866	0.722812	-0.165945	#N/A	#N/A	#N/A	0.492611	0.766238	-0.273627	0.633553	0.719699	-0.0861456	#N/A	#N/A	#N/A	0	No	No	1
CYP2F1	0.203538	0.711875	-0.508337	0.221428	0.406955	-0.185527	0.223546	0.635457	-0.411912	0.225729	0.674395	-0.448665	0.644703	0.771543	-0.12684	0.00810601	0.0184211	-0.0103151	0	No	No	3
CYP3A4	0.623075	0.805423	-0.182348	#N/A	#N/A	#N/A	#N/A	#N/A	#N/A	#N/A	#N/A	#N/A	0.673754	0.905747	-0.231993	0.610113	0.856239	-0.246126	0	No	No	2
CYP3A43	0.594135	0.879555	-0.285421	0.478908	0.799636	-0.320728	#N/A	#N/A	#N/A	#N/A	#N/A	#N/A	0.427394	0.715543	-0.288149	0.563055	0.868281	-0.305227	0	No	No	4
CYP3A7	0.61902	0.898744	-0.279724	0.323392	0.443206	-0.119813	0.287378	0.358244	-0.0708654	0.287378	0.358244	-0.0708654	0.643328	0.871369	-0.228042	0.533776	0.836651	-0.302875	0	No	No	3
CYP4A11	#N/A	#N/A	#N/A	0.189705	0.567987	-0.378282	#N/A	#N/A	#N/A	0.209376	0.629462	-0.420086	0.42081	0.46061	-0.0398001	0.316476	0.406371	-0.0898949	0	No	No	2
CYP4A22	#N/A	#N/A	#N/A	0.130384	0.793012	-0.662628	#N/A	#N/A	#N/A	0.145379	0.479957	-0.334578	0.279015	0.910267	-0.631252	#N/A	#N/A	#N/A	0	No	No	3
CYP4B1	0.305479	0.885774	-0.580295	0.19037	0.262103	-0.0717329	#N/A	#N/A	#N/A	0.166087	0.397734	-0.231647	0.300551	0.902635	-0.602084	0.141416	0.858035	-0.71662	0	No	No	4
CYP4F11	0.2373	0.57951	-0.34221	0.153854	0.453444	-0.299591	#N/A	#N/A	#N/A	0.289575	0.602591	-0.313015	0.447574	0.731316	-0.283743	0.521738	0.712441	-0.190703	0	No	No	4
CYP4F12	0.337996	0.535053	-0.197057	0.108397	0.172988	-0.0645904	#N/A	#N/A	#N/A	#N/A	#N/A	#N/A	0.52564	0.807824	-0.282184	#N/A	#N/A	#N/A	0	No	No	1
CYP4F2	0.26325	0.766378	-0.503128	#N/A	#N/A	#N/A	0.537613	0.819761	-0.282147	#N/A	#N/A	#N/A	0.346305	0.651758	-0.305453	0.549121	0.919547	-0.370426	0	No	No	4
CYP4F3	0.610128	0.907153	-0.297025	0.100438	0.215427	-0.114989	0.162316	0.330176	-0.16786	#N/A	#N/A	#N/A	0.397392	0.753271	-0.355879	0.5503	0.817247	-0.266947	0	No	No	3
CYP4F8	0.257054	0.632339	-0.375285	0.310395	0.648707	-0.338312	#N/A	#N/A	#N/A	#N/A	#N/A	#N/A	0.275369	0.482264	-0.206895	0.0683066	0.0584971	0.00980954	0	No	No	3
CYP4Z2P	0.38633	0.715601	-0.32927	#N/A	#N/A	#N/A	#N/A	#N/A	#N/A	#N/A	#N/A	#N/A	0.222375	0.810758	-0.588384	#N/A	#N/A	#N/A	0	No	No	2
CYP8B1	0.392164	0.750178	-0.358014	#N/A	#N/A	#N/A	0.578372	0.765414	-0.187042	0.422553	0.716324	-0.293771	#N/A	#N/A	#N/A	0.110915	0.618144	-0.507229	0	No	No	3
CYSLTR1	0.586155	0.765049	-0.178894	#N/A	#N/A	#N/A	0.120688	0.47906	-0.358373	0.120688	0.47906	-0.358373	#N/A	#N/A	#N/A	#N/A	#N/A	#N/A	0	No	No	2
CYTIP	0.568194	0.732581	-0.164387	#N/A	#N/A	#N/A	#N/A	#N/A	#N/A	0.72039	0.896271	-0.175881	0.373245	0.306647	0.0665978	0.703398	0.924077	-0.22068	0	No	No	1
CYTL1	0.816383	0.841097	-0.0247139	0.0697911	0.0989306	-0.0291395	#N/A	#N/A	#N/A	0.0401971	0.0574576	-0.0172605	0.612189	0.711052	-0.0988626	0.704882	0.909511	-0.204628	0	No	No	1
CYYR1	0.717076	0.706178	0.0108977	0.271709	0.102579	0.16913	0.621	0.161073	0.459927	0.621	0.161073	0.459927	0.543281	0.482021	0.0612598	0.748349	0.957315	-0.208965	2	No	No	1
D4S234E	0.642213	0.437902	0.204311	0.0668149	0.0494974	0.0173174	0.0651437	0.0618486	0.00329516	0.0167492	0.0205793	-0.00383012	0.484663	0.621488	-0.136825	0.900744	0.9044	-0.00365517	1	Yes	No	0
DAB1	0.525841	0.820083	-0.294242	0.131379	0.155185	-0.0238061	0.318348	0.531926	-0.213577	0.059694	0.0595335	0.00016042	0.511903	0.804646	-0.292743	0.649917	0.910265	-0.260348	0	Yes	No	4
DACH2	0.271605	0.453114	-0.181509	0.303888	0.354651	-0.0507634	0.327445	0.390829	-0.0633842	0.313511	0.389973	-0.0764622	0.257624	0.587688	-0.330064	0.358073	0.858464	-0.500391	0	Yes	No	2
DALRD3	0.110453	0.139401	-0.0289484	0.0220712	0.0301118	-0.00804064	0.171061	0.179859	-0.00879725	0.0418444	0.0581867	-0.0163424	0.473103	0.436872	0.0362305	0.784187	0.570604	0.213583	1	No	No	0
DAO	0.619944	0.677587	-0.0576433	0.409751	0.565493	-0.155742	0.500735	0.699934	-0.1992	0.406023	0.547063	-0.14104	0.700768	0.909114	-0.208346	#N/A	#N/A	#N/A	0	No	No	1
DAPL1	0.592466	0.760579	-0.168113	0.132289	0.173952	-0.0416633	#N/A	#N/A	#N/A	0.201635	0.506691	-0.305056	0.28448	0.561725	-0.277245	0.446146	0.602296	-0.15615	0	No	No	2
DAPP1	0.618688	0.883498	-0.26481	0.502893	0.763828	-0.260935	0.390616	0.781634	-0.391018	0.385179	0.621109	-0.23593	0.611454	0.867426	-0.255972	0.513045	0.666407	-0.153362	0	No	No	5
DARC	0.378053	0.619872	-0.241819	#N/A	#N/A	#N/A	0.454281	0.617291	-0.163009	0.456219	0.633359	-0.17714	0.464665	0.596429	-0.131765	#N/A	#N/A	#N/A	0	No	No	1
DBC1	0.136754	0.110114	0.0266408	0.0806268	0.0838836	-0.00325677	0.327512	0.415404	-0.0878925	0.162663	0.121922	0.0407414	0.712231	0.94455	-0.232319	#N/A	#N/A	#N/A	0	No	No	1
DBH	0.440421	0.797222	-0.356801	0.239346	0.698938	-0.459592	#N/A	#N/A	#N/A	0.643188	0.96899	-0.325801	0.384194	0.535838	-0.151644	#N/A	#N/A	#N/A	0	No	No	3
DBX2	0.0908054	0.135518	-0.0447131	0.0519921	0.0454089	0.00658316	0.0628283	0.085539	-0.0227107	0.183649	0.0686278	0.115021	0.503353	0.541642	-0.0382889	0.303346	0.87834	-0.574994	0	No	No	1
DCAF12L1	0.426604	0.591575	-0.164971	0.468224	0.448536	0.019688	0.741125	0.589779	0.151346	0.67972	0.693557	-0.0138374	#N/A	#N/A	#N/A	0.59647	0.909024	-0.312554	0	No	No	1
DCAF12L2	0.389601	0.549637	-0.160036	0.454947	0.499916	-0.0449691	#N/A	#N/A	#N/A	0.59878	0.888174	-0.289394	#N/A	#N/A	#N/A	#N/A	#N/A	#N/A	0	No	No	1
DCAF4L1	0.891581	0.927892	-0.036311	0.421206	0.801827	-0.380621	0.718534	0.901378	-0.182844	0.5842	0.847235	-0.263035	#N/A	#N/A	#N/A	0.664361	0.691147	-0.0267858	0	No	No	2
DCAF8L1	0.609029	0.899431	-0.290402	0.426199	0.72165	-0.295451	0.473575	0.875302	-0.401727	0.453309	0.853767	-0.400458	#N/A	#N/A	#N/A	0.412778	0.810698	-0.39792	0	No	No	5
DCAF8L2	0.602902	0.909856	-0.306955	0.62501	0.848084	-0.223074	0.394917	0.60011	-0.205192	0.453341	0.753407	-0.300066	#N/A	#N/A	#N/A	#N/A	#N/A	#N/A	0	No	No	4
DCC	0.135511	0.367003	-0.231492	0.0689903	0.0761759	-0.00718565	0.0664338	0.0953432	-0.0289093	0.0664338	0.0953432	-0.0289093	0.146312	0.236005	-0.0896925	0.485014	0.629329	-0.144315	0	Yes	No	1
DCD	0.390867	0.813735	-0.422868	0.417771	0.819066	-0.401295	#N/A	#N/A	#N/A	#N/A	#N/A	#N/A	0.404153	0.81987	-0.415717	#N/A	#N/A	#N/A	0	No	No	3
DCDC1	0.0433402	0.0534016	-0.0100614	0.0197221	0.0208969	-0.00117479	0.0824552	0.102242	-0.0197864	0.0269276	0.0250249	0.00190274	0.652616	0.860209	-0.207593	#N/A	#N/A	#N/A	0	No	No	1
DCDC2	0.428894	0.360471	0.068423	0.421789	0.0658131	0.355976	0.610131	0.155615	0.454517	0.50014	0.21542	0.28472	0.484398	0.679766	-0.195368	0.400656	0.86074	-0.460083	3	No	No	1
DCDC2B	0.814701	0.847573	-0.0328718	#N/A	#N/A	#N/A	#N/A	#N/A	#N/A	0.355196	0.6296	-0.274405	0.119162	0.0983018	0.0208602	0.855784	0.836387	0.0193965	0	No	No	1
DCLK3	0.712124	0.827201	-0.115077	0.78748	0.946083	-0.158603	0.581821	0.711715	-0.129893	#N/A	#N/A	#N/A	0.848752	0.927484	-0.0787319	0.660133	0.933298	-0.273166	0	No	No	1
DCLRE1B	0.0123991	0.0187297	-0.00633055	#N/A	#N/A	#N/A	0.0515379	0.0545033	-0.00296543	0.0515379	0.0545033	-0.00296543	0.701547	0.716158	-0.0146108	0.84025	0.511144	0.329106	1	No	No	0
DCPS	0.182271	0.503642	-0.32137	0.0573805	0.117265	-0.0598847	0.0187199	0.0226024	-0.0038825	0.0305625	0.0353658	-0.00480324	0.630682	0.625019	0.00566316	0.643453	0.424851	0.218603	1	No	No	1
DCTN1	0.869168	0.844365	0.0248032	0.296045	0.241106	0.054939	0.512056	0.305196	0.206859	0.512056	0.305196	0.206859	0.839235	0.683771	0.155464	0.984531	0.960889	0.0236425	2	No	No	0
DCX	0.318434	0.561749	-0.243315	0.315431	0.451514	-0.136083	0.256446	0.474531	-0.218085	0.151848	0.488832	-0.336984	0.313726	0.501522	-0.187796	0.384937	0.716914	-0.331978	0	No	No	4
DDAH2	0.78639	0.797181	-0.0107908	0.0311069	0.0387307	-0.00762384	0.0494973	0.0541999	-0.00470259	0.072532	0.0697405	0.00279154	0.669568	0.431949	0.237619	#N/A	#N/A	#N/A	1	No	No	0
DDC	0.282952	0.686053	-0.403101	0.246426	0.518282	-0.271856	0.275545	0.645627	-0.370083	0.139262	0.377016	-0.237754	0.386196	0.533669	-0.147474	0.48056	0.704798	-0.224238	0	No	No	5
DDI1	#N/A	#N/A	#N/A	0.766883	0.919716	-0.152833	0.885763	0.926711	-0.0409479	0.807699	0.93635	-0.128652	#N/A	#N/A	#N/A	0.72111	0.923797	-0.202688	0	No	No	1
DDN	0.175484	0.196761	-0.0212775	0.0326141	0.0447366	-0.0121226	#N/A	#N/A	#N/A	0.0620907	0.0725804	-0.0104897	0.533078	0.173231	0.359847	0.209221	0.184338	0.0248832	1	No	No	0
DDX26B	0.312474	0.563178	-0.250704	0.179604	0.37013	-0.190525	0.206236	0.514839	-0.308603	0.206236	0.514839	-0.308603	0.308585	0.399722	-0.0911363	0.562004	0.503279	0.0587248	0	No	No	3
DDX47	0.386797	0.446036	-0.0592394	0.0244269	0.0304769	-0.00605008	#N/A	#N/A	#N/A	#N/A	#N/A	#N/A	0.501171	0.488986	0.0121848	0.44456	0.21006	0.2345	1	No	No	0
DDX5	0.0467187	0.0492516	-0.00253281	0.103624	0.10557	-0.00194647	0.00752023	0.0142978	-0.00677753	0.00752023	0.0142978	-0.00677753	0.477279	0.468505	0.00877423	0.69963	0.437189	0.262441	1	No	No	0
DDX53	0.526489	0.84722	-0.32073	0.515261	0.774407	-0.259147	0.638287	0.884437	-0.246151	0.638287	0.884437	-0.246151	#N/A	#N/A	#N/A	#N/A	#N/A	#N/A	0	No	No	4
DDX56	0.615124	0.762558	-0.147434	0.231708	0.748092	-0.516385	0.04864	0.0679375	-0.0192975	0.0454555	0.0643755	-0.01892	0.279223	0.307447	-0.0282243	0.627774	0.591909	0.0358654	0	No	No	1
DEFA1	0.235044	0.842181	-0.607137	#N/A	#N/A	#N/A	0.172147	0.463017	-0.290871	#N/A	#N/A	#N/A	0.244047	0.812425	-0.568379	#N/A	#N/A	#N/A	0	No	No	3
DEFA10P	0.319892	0.743187	-0.423294	#N/A	#N/A	#N/A	#N/A	#N/A	#N/A	#N/A	#N/A	#N/A	0.105239	0.696479	-0.591239	#N/A	#N/A	#N/A	0	No	No	2
DEFA1B	0.235044	0.842181	-0.607137	#N/A	#N/A	#N/A	0.172147	0.463017	-0.290871	#N/A	#N/A	#N/A	0.244047	0.812425	-0.568379	#N/A	#N/A	#N/A	0	No	No	3
DEFA3	0.236971	0.900151	-0.663179	#N/A	#N/A	#N/A	0.172147	0.463017	-0.290871	#N/A	#N/A	#N/A	0.244047	0.812425	-0.568379	#N/A	#N/A	#N/A	0	No	No	3
DEFA4	0.212614	0.808936	-0.596322	0.389071	0.873237	-0.484166	0.229024	0.747455	-0.518431	#N/A	#N/A	#N/A	#N/A	#N/A	#N/A	0.22632	0.872258	-0.645938	0	No	No	4
DEFA5	0.185012	0.76523	-0.580217	#N/A	#N/A	#N/A	#N/A	#N/A	#N/A	#N/A	#N/A	#N/A	0.582452	0.82184	-0.239388	#N/A	#N/A	#N/A	0	No	No	2
DEFA6	0.269526	0.896563	-0.627037	0.295408	0.578373	-0.282965	#N/A	#N/A	#N/A	0.187035	0.672196	-0.485161	0.26107	0.915916	-0.654846	#N/A	#N/A	#N/A	0	No	No	4
DEFB1	0.157517	0.629812	-0.472295	0.0968275	0.599411	-0.502584	0.126434	0.551468	-0.425034	0.126434	0.551468	-0.425034	0.277124	0.782206	-0.505083	#N/A	#N/A	#N/A	0	No	No	5
DEFB104A	0.36496	0.708505	-0.343545	#N/A	#N/A	#N/A	#N/A	#N/A	#N/A	#N/A	#N/A	#N/A	0.270235	0.758333	-0.488097	#N/A	#N/A	#N/A	0	No	No	2
DEFB104B	0.36496	0.708505	-0.343545	#N/A	#N/A	#N/A	#N/A	#N/A	#N/A	#N/A	#N/A	#N/A	0.270235	0.758333	-0.488097	#N/A	#N/A	#N/A	0	No	No	2
DEFB105A	0.189483	0.835814	-0.646331	#N/A	#N/A	#N/A	#N/A	#N/A	#N/A	#N/A	#N/A	#N/A	0.344767	0.90132	-0.556553	#N/A	#N/A	#N/A	0	No	No	2
DEFB105B	0.189483	0.835814	-0.646331	#N/A	#N/A	#N/A	#N/A	#N/A	#N/A	#N/A	#N/A	#N/A	0.344767	0.90132	-0.556553	#N/A	#N/A	#N/A	0	No	No	2
DEFB106A	0.189483	0.835814	-0.646331	#N/A	#N/A	#N/A	#N/A	#N/A	#N/A	#N/A	#N/A	#N/A	0.258622	0.811504	-0.552882	#N/A	#N/A	#N/A	0	No	No	2
DEFB106B	0.189483	0.835814	-0.646331	#N/A	#N/A	#N/A	#N/A	#N/A	#N/A	#N/A	#N/A	#N/A	0.258622	0.811504	-0.552882	#N/A	#N/A	#N/A	0	No	No	2
DEFB107A	#N/A	#N/A	#N/A	#N/A	#N/A	#N/A	#N/A	#N/A	#N/A	#N/A	#N/A	#N/A	0.330804	0.677636	-0.346831	#N/A	#N/A	#N/A	0	No	No	1
DEFB107B	#N/A	#N/A	#N/A	#N/A	#N/A	#N/A	#N/A	#N/A	#N/A	#N/A	#N/A	#N/A	0.330804	0.677636	-0.346831	#N/A	#N/A	#N/A	0	No	No	1
DEFB109P1	#N/A	#N/A	#N/A	#N/A	#N/A	#N/A	#N/A	#N/A	#N/A	#N/A	#N/A	#N/A	0.502116	0.790385	-0.28827	#N/A	#N/A	#N/A	0	No	No	1
DEFB110	#N/A	#N/A	#N/A	#N/A	#N/A	#N/A	#N/A	#N/A	#N/A	#N/A	#N/A	#N/A	0.180506	0.833876	-0.65337	0.180283	0.894878	-0.714594	0	No	No	2
DEFB112	0.427407	0.641174	-0.213768	#N/A	#N/A	#N/A	#N/A	#N/A	#N/A	#N/A	#N/A	#N/A	#N/A	#N/A	#N/A	#N/A	#N/A	#N/A	0	No	No	1
DEFB113	0.554655	0.902953	-0.348298	#N/A	#N/A	#N/A	#N/A	#N/A	#N/A	#N/A	#N/A	#N/A	#N/A	#N/A	#N/A	#N/A	#N/A	#N/A	0	No	No	1
DEFB115	0.154067	0.68339	-0.529324	0.180026	0.513434	-0.333408	#N/A	#N/A	#N/A	#N/A	#N/A	#N/A	0.085673	0.38946	-0.303787	#N/A	#N/A	#N/A	0	No	No	3
DEFB116	0.266268	0.727203	-0.460935	0.20901	0.828906	-0.619897	#N/A	#N/A	#N/A	#N/A	#N/A	#N/A	0.123742	0.494573	-0.370831	#N/A	#N/A	#N/A	0	No	No	3
DEFB118	0.156112	0.660312	-0.5042	0.132311	0.591279	-0.458969	#N/A	#N/A	#N/A	#N/A	#N/A	#N/A	0.142804	0.837677	-0.694873	0.184246	0.816215	-0.63197	0	No	No	4
DEFB119	0.133085	0.732611	-0.599526	#N/A	#N/A	#N/A	0.120679	0.489279	-0.3686	0.120679	0.489279	-0.3686	0.120723	0.583226	-0.462503	0.120908	0.743967	-0.623059	0	No	No	5
DEFB121	0.273063	0.681749	-0.408687	0.0900616	0.411143	-0.321081	#N/A	#N/A	#N/A	#N/A	#N/A	#N/A	0.0813195	0.497035	-0.415716	#N/A	#N/A	#N/A	0	No	No	3
DEFB122	0.318535	0.74686	-0.428325	#N/A	#N/A	#N/A	#N/A	#N/A	#N/A	#N/A	#N/A	#N/A	0.137711	0.735453	-0.597741	#N/A	#N/A	#N/A	0	No	No	2
DEFB123	0.360738	0.694322	-0.333584	0.329517	0.782472	-0.452955	0.390615	0.852683	-0.462068	0.390615	0.852683	-0.462068	0.316234	0.722515	-0.406281	#N/A	#N/A	#N/A	0	No	No	5
DEFB125	0.418355	0.710915	-0.29256	0.224033	0.656697	-0.432664	#N/A	#N/A	#N/A	0.125062	0.588984	-0.463922	0.265026	0.715626	-0.4506	#N/A	#N/A	#N/A	0	No	No	4
DEFB126	#N/A	#N/A	#N/A	0.154661	0.569525	-0.414864	#N/A	#N/A	#N/A	#N/A	#N/A	#N/A	0.159206	0.679248	-0.520043	#N/A	#N/A	#N/A	0	No	No	2
DEFB127	0.300098	0.896204	-0.596106	#N/A	#N/A	#N/A	#N/A	#N/A	#N/A	#N/A	#N/A	#N/A	0.0706081	0.454252	-0.383644	0.057681	0.187446	-0.129765	0	No	No	2
DEFB128	0.16131	0.605086	-0.443776	0.381871	0.853641	-0.47177	#N/A	#N/A	#N/A	#N/A	#N/A	#N/A	#N/A	#N/A	#N/A	#N/A	#N/A	#N/A	0	No	No	2
DEFB129	0.219981	0.726126	-0.506145	0.202353	0.736342	-0.533989	#N/A	#N/A	#N/A	#N/A	#N/A	#N/A	#N/A	#N/A	#N/A	#N/A	#N/A	#N/A	0	No	No	2
DEFB131	0.341419	0.8762	-0.53478	0.0921338	0.404794	-0.31266	#N/A	#N/A	#N/A	#N/A	#N/A	#N/A	0.66046	0.71473	-0.0542694	#N/A	#N/A	#N/A	0	No	No	2
DEFB132	0.411692	0.783429	-0.371737	#N/A	#N/A	#N/A	#N/A	#N/A	#N/A	0.223897	0.761549	-0.537652	0.0719325	0.209525	-0.137592	0.392572	0.582696	-0.190124	0	No	No	2
DEFB133	0.389872	0.679964	-0.290092	0.256173	0.822777	-0.566604	#N/A	#N/A	#N/A	0.13091	0.842129	-0.711219	0.218463	0.88779	-0.669327	#N/A	#N/A	#N/A	0	No	No	4
DEFB134	#N/A	#N/A	#N/A	0.616881	0.807264	-0.190383	#N/A	#N/A	#N/A	#N/A	#N/A	#N/A	0.351222	0.830358	-0.479136	#N/A	#N/A	#N/A	0	No	No	1
DEFB135	0.52998	0.764569	-0.234589	0.352034	0.772946	-0.420911	#N/A	#N/A	#N/A	0.176376	0.835662	-0.659287	0.71355	0.914665	-0.201115	#N/A	#N/A	#N/A	0	No	No	4
DEFB136	0.686457	0.806904	-0.120447	0.246165	0.582678	-0.336513	#N/A	#N/A	#N/A	#N/A	#N/A	#N/A	0.615501	0.759497	-0.143996	#N/A	#N/A	#N/A	0	No	No	1
DEFB4	0.588828	0.872696	-0.283868	#N/A	#N/A	#N/A	#N/A	#N/A	#N/A	#N/A	#N/A	#N/A	0.352147	0.724056	-0.371908	0.664473	0.936383	-0.271911	0	No	No	3
DENND1C	0.289841	0.369426	-0.0795849	0.218794	0.349457	-0.130663	0.121461	0.44333	-0.321869	0.121461	0.44333	-0.321869	0.355656	0.457082	-0.101427	0.211805	0.489527	-0.277722	0	No	No	3
DENND2D	0.279939	0.635639	-0.3557	0.559868	0.767159	-0.207291	0.710707	0.839831	-0.129124	0.736817	0.847355	-0.110538	0.569848	0.629548	-0.0597008	0.890324	0.905114	-0.0147893	0	No	No	2
DERL3	0.465704	0.373575	0.092129	0.399439	0.124514	0.274925	0.375102	0.00214906	0.372953	0.375102	0.00214906	0.372953	0.592671	0.554396	0.0382746	0.711097	0.693996	0.0171012	3	No	No	0
DGAT2L6	0.434046	0.606415	-0.172369	0.578913	0.534642	0.0442705	#N/A	#N/A	#N/A	0.451167	0.788024	-0.336858	0.658839	0.694238	-0.0353994	0.367657	0.802388	-0.434731	0	No	No	2
DGCR10	0.488139	0.775508	-0.287369	0.646771	0.844333	-0.197562	#N/A	#N/A	#N/A	#N/A	#N/A	#N/A	0.253256	0.545917	-0.292661	#N/A	#N/A	#N/A	0	No	No	2
DGCR9	0.569623	0.845324	-0.275702	0.47496	0.885587	-0.410627	#N/A	#N/A	#N/A	#N/A	#N/A	#N/A	0.585717	0.859252	-0.273534	#N/A	#N/A	#N/A	0	No	No	3
DGKB	0.669184	0.907717	-0.238533	#N/A	#N/A	#N/A	#N/A	#N/A	#N/A	#N/A	#N/A	#N/A	0.510376	0.703903	-0.193527	0.741194	0.939986	-0.198792	0	No	No	1
DGKG	0.0877247	0.219325	-0.131601	0.0642649	0.0705277	-0.00626284	0.187027	0.21271	-0.025683	0.0901274	0.076213	0.0139144	0.360402	0.46982	-0.109418	0.569163	0.921356	-0.352193	0	Yes	No	1
DGKK	0.173853	0.378829	-0.204975	0.184936	0.329396	-0.14446	0.397433	0.473038	-0.0756057	0.356927	0.522641	-0.165714	0.184896	0.328608	-0.143712	#N/A	#N/A	#N/A	0	No	No	1
DHPS	0.720965	0.78993	-0.0689647	0.0301864	0.0319407	-0.00175426	#N/A	#N/A	#N/A	0.064024	0.0675233	-0.00349936	0.340478	0.321646	0.0188329	0.876321	0.594437	0.281883	1	No	No	0
DHRS2	0.747731	0.832189	-0.0844581	#N/A	#N/A	#N/A	0.604547	0.725687	-0.12114	0.705747	0.824107	-0.11836	0.448194	0.829122	-0.380928	#N/A	#N/A	#N/A	0	No	No	1
DHRS4L2	0.764546	0.58225	0.182296	0.289273	0.0830652	0.206207	0.216434	0.0656638	0.15077	0.351094	0.152465	0.198629	0.434154	0.236951	0.197203	0.784534	0.791295	-0.00676098	1	No	No	0
DHRS7B	0.256221	0.308787	-0.052566	0.0240833	0.034251	-0.0101677	#N/A	#N/A	#N/A	#N/A	#N/A	#N/A	0.356454	0.32155	0.0349032	0.912388	0.635964	0.276423	1	No	No	0
DHRS7C	0.446267	0.606327	-0.16006	0.196972	0.529355	-0.332382	#N/A	#N/A	#N/A	0.356929	0.692246	-0.335318	0.476	0.77794	-0.30194	#N/A	#N/A	#N/A	0	No	No	3
DHRS9	0.47213	0.705822	-0.233693	#N/A	#N/A	#N/A	0.47691	0.703744	-0.226834	#N/A	#N/A	#N/A	0.341296	0.688333	-0.347036	#N/A	#N/A	#N/A	0	No	No	3
DHX16	0.135188	0.355449	-0.220261	0.0369691	0.0424802	-0.00551116	0.0491688	0.0622133	-0.0130445	0.0347543	0.0454326	-0.0106783	0.48216	0.470208	0.0119515	#N/A	#N/A	#N/A	0	No	No	1
DHX36	0.275312	0.515205	-0.239894	0.0363058	0.044332	-0.00802615	#N/A	#N/A	#N/A	0.0846008	0.114926	-0.0303247	0.581553	0.640757	-0.0592039	#N/A	#N/A	#N/A	0	No	No	1
DHX40P	0.418588	0.750883	-0.332295	0.604883	0.634714	-0.0298319	#N/A	#N/A	#N/A	#N/A	#N/A	#N/A	0.719065	0.860461	-0.141396	#N/A	#N/A	#N/A	0	No	No	1
DIAPH2	0.266329	0.493612	-0.227283	0.280524	0.175526	0.104998	0.0685873	0.147599	-0.0790118	0.0654487	0.152731	-0.0872825	0.560986	0.718956	-0.15797	0.562981	0.809836	-0.246854	0	No	No	2
DIO2	0.364153	0.505591	-0.141437	0.0394662	0.0511383	-0.0116721	0.103117	0.158192	-0.0550757	0.182854	0.380998	-0.198144	0.456638	0.699462	-0.242825	0.256158	0.859065	-0.602906	0	No	No	2
DIO3OS	0.46526	0.739228	-0.273968	#N/A	#N/A	#N/A	#N/A	#N/A	#N/A	#N/A	#N/A	#N/A	0.672996	0.859899	-0.186903	#N/A	#N/A	#N/A	0	Yes	No	1
DIP2B	0.208139	0.464584	-0.256445	0.0190464	0.0233818	-0.00433546	#N/A	#N/A	#N/A	0.0120358	0.0244358	-0.0123999	0.561609	0.573701	-0.0120922	0.896257	0.914595	-0.0183375	0	No	No	1
DIRAS2	#N/A	#N/A	#N/A	0.0869473	0.0672417	0.0197056	0.320495	0.570617	-0.250122	#N/A	#N/A	#N/A	0.244116	0.754695	-0.510579	0.588334	0.899725	-0.311391	0	No	No	3
DISC1	0.172878	0.192205	-0.019326	0.00641413	0.0113248	-0.00491072	#N/A	#N/A	#N/A	0.05327	0.0713232	-0.0180532	0.518113	0.690546	-0.172434	0.594186	0.877977	-0.283791	0	No	No	1
DKFZp434J0226	0.6941	0.726121	-0.0320206	0.822478	0.825005	-0.00252746	#N/A	#N/A	#N/A	#N/A	#N/A	#N/A	0.697032	0.455178	0.241855	#N/A	#N/A	#N/A	1	No	No	0
DKFZp434L192	0.161689	0.633682	-0.471993	0.0851169	0.296415	-0.211298	#N/A	#N/A	#N/A	#N/A	#N/A	#N/A	0.252119	0.607043	-0.354924	#N/A	#N/A	#N/A	0	No	No	3
DKFZp686A1627	0.354259	0.767036	-0.412777	0.388547	0.826867	-0.438319	#N/A	#N/A	#N/A	#N/A	#N/A	#N/A	0.214434	0.72096	-0.506526	#N/A	#N/A	#N/A	0	No	No	3
DKFZP686I15217	0.580831	0.84549	-0.264659	#N/A	#N/A	#N/A	#N/A	#N/A	#N/A	#N/A	#N/A	#N/A	0.0940476	0.123306	-0.0292582	#N/A	#N/A	#N/A	0	No	No	1
DKK2	0.0788436	0.0891348	-0.0102913	#N/A	#N/A	#N/A	0.0404547	0.047226	-0.00677133	0.0968878	0.0555914	0.0412965	0.413794	0.237619	0.176176	0.32522	0.940485	-0.615265	0	Yes	No	1
DKKL1	0.0243793	0.0395457	-0.0151664	0.0403257	0.0448478	-0.00452206	0.0685299	0.0927438	-0.0242139	0.0685299	0.0927438	-0.0242139	0.600258	0.853686	-0.253428	0.733513	0.898112	-0.164599	0	No	No	1
DLAT	0.57142	0.351615	0.219805	0.19863	0.0731804	0.12545	0.0930496	0.0646214	0.0284281	0.0652295	0.0529299	0.0122996	0.551893	0.639439	-0.0875451	0.623117	0.868982	-0.245865	1	No	No	1
DLEC1	0.749911	0.817651	-0.0677397	0.356815	0.127517	0.229298	0.258071	0.0403125	0.217759	0.213451	0.044516	0.168935	0.279253	0.396687	-0.117434	0.956952	0.954808	0.00214417	2	Yes	No	0
DLEU2L	0.895906	0.956619	-0.0607131	0.837001	0.616407	0.220594	#N/A	#N/A	#N/A	#N/A	#N/A	#N/A	0.935449	0.932244	0.00320455	#N/A	#N/A	#N/A	1	No	No	0
DLEU7	0.82808	0.761477	0.066603	0.913544	0.478543	0.435002	0.714421	0.0611579	0.653263	0.597016	0.0658786	0.531138	0.730961	0.856182	-0.125221	#N/A	#N/A	#N/A	3	No	No	0
DLG2	0.244248	0.317243	-0.0729951	0.252318	0.420855	-0.168536	0.370246	0.517142	-0.146896	0.221686	0.340952	-0.119266	0.442963	0.600433	-0.15747	0.613642	0.838252	-0.22461	0	No	No	1
DLG3	0.547223	0.653373	-0.106151	0.143696	0.370332	-0.226636	0.307728	0.538403	-0.230675	0.299697	0.521319	-0.221622	0.396931	0.549776	-0.152845	0.748341	0.834365	-0.086024	0	No	No	3
DLGAP1	0.64356	0.906499	-0.262939	0.633862	0.886754	-0.252891	0.867395	0.976769	-0.109374	0.843554	0.932121	-0.0885673	0.35842	0.448784	-0.090364	0.518919	0.542499	-0.0235796	0	No	No	2
DLGAP2	0.683667	0.854194	-0.170527	0.552949	0.835905	-0.282957	0.536796	0.760593	-0.223797	#N/A	#N/A	#N/A	0.582781	0.841727	-0.258946	0.559928	0.683552	-0.123623	0	No	No	3
DLGAP3	#N/A	#N/A	#N/A	#N/A	#N/A	#N/A	#N/A	#N/A	#N/A	0.35438	0.689485	-0.335105	0.393826	0.407117	-0.0132915	0.0127637	0.0104857	0.00227802	0	No	No	1
DLGAP4	0.290873	0.471812	-0.18094	0.188513	0.514304	-0.325791	0.460859	0.548294	-0.0874352	0.23823	0.369933	-0.131703	0.492613	0.514805	-0.0221913	0.972126	0.933465	0.0386605	0	No	No	1
DLST	0.0654075	0.077392	-0.0119845	0.0392551	0.0486824	-0.00942731	#N/A	#N/A	#N/A	#N/A	#N/A	#N/A	0.164725	0.118663	0.0460617	0.754547	0.444401	0.310146	1	No	No	0
DLX1	0.178812	0.185301	-0.00648883	0.0272058	0.0418785	-0.0146726	0.0473875	0.0910727	-0.0436852	0.0542464	0.102318	-0.0480714	0.500011	0.196812	0.303199	0.847746	0.259499	0.588248	2	Yes	No	0
DLX2	0.0356455	0.137464	-0.101818	0.0209705	0.03732	-0.0163495	0.0292645	0.0413888	-0.0121242	0.0392133	0.0584698	-0.0192564	0.567233	0.193618	0.373615	0.27126	0.179464	0.0917963	1	Yes	No	0
DLX3	0.306788	0.337825	-0.0310362	0.0350738	0.0421576	-0.00708377	0.0310632	0.0407838	-0.0097206	0.0407811	0.0640558	-0.0232747	0.370838	0.237182	0.133656	0.464145	0.78869	-0.324545	0	Yes	No	1
DLX5	0.493807	0.250512	0.243295	0.0795677	0.0824193	-0.00285161	0.0929593	0.108309	-0.0153495	0.112792	0.0794678	0.0333246	0.461887	0.349333	0.112554	0.762952	0.652821	0.110131	1	Yes	No	0
DMBT1	0.481687	0.617711	-0.136024	0.587646	0.491499	0.0961475	#N/A	#N/A	#N/A	#N/A	#N/A	#N/A	0.472165	0.772671	-0.300506	0.603679	0.883704	-0.280026	0	No	No	2
DMBX1	0.666804	0.776348	-0.109544	0.818555	0.895101	-0.0765463	#N/A	#N/A	#N/A	0.771923	0.700669	0.0712546	0.608041	0.836872	-0.228831	0.504234	0.746991	-0.242757	0	No	No	2
DMGDH	0.456195	0.294321	0.161875	0.421382	0.140804	0.280579	#N/A	#N/A	#N/A	#N/A	#N/A	#N/A	0.677885	0.715958	-0.0380728	#N/A	#N/A	#N/A	1	No	No	0
DMKN	0.301338	0.552092	-0.250754	0.175395	0.247181	-0.0717859	0.0854019	0.105953	-0.0205507	0.175385	0.305563	-0.130178	0.18782	0.326226	-0.138406	#N/A	#N/A	#N/A	0	No	No	1
DMPK	0.304086	0.329537	-0.0254503	0.534878	0.275769	0.259109	0.139925	0.198082	-0.058157	0.354824	0.161264	0.193561	0.624739	0.5226	0.102138	0.0416938	0.0534224	-0.0117286	1	No	No	0
DMRT2	0.540277	0.439882	0.100395	#N/A	#N/A	#N/A	0.496689	0.529695	-0.0330057	0.316625	0.186932	0.129693	0.419017	0.418635	0.000382793	0.443153	0.741288	-0.298135	0	Yes	No	1
DMRT3	0.28125	0.323209	-0.0419593	0.0452114	0.0520255	-0.0068141	#N/A	#N/A	#N/A	0.0822147	0.0869822	-0.00476748	0.372039	0.496618	-0.124579	0.324815	0.741511	-0.416696	0	Yes	No	1
DMRTA2	0.281585	0.1263	0.155285	0.342083	0.0987668	0.243316	0.511849	0.210778	0.301072	0.373353	0.078184	0.295169	0.152276	0.130759	0.0215167	0.624802	0.172106	0.452696	4	Yes	No	0
DMRTC1	#N/A	#N/A	#N/A	#N/A	#N/A	#N/A	#N/A	#N/A	#N/A	#N/A	#N/A	#N/A	0.48515	0.773591	-0.288442	#N/A	#N/A	#N/A	0	No	No	1
DMRTC1B	#N/A	#N/A	#N/A	#N/A	#N/A	#N/A	#N/A	#N/A	#N/A	#N/A	#N/A	#N/A	0.48515	0.773591	-0.288442	#N/A	#N/A	#N/A	0	No	No	1
DMRTC2	0.61525	0.845548	-0.230298	0.653662	0.92721	-0.273548	0.307827	0.81586	-0.508033	0.307827	0.81586	-0.508033	0.765585	0.853527	-0.0879418	0.214008	0.554865	-0.340857	0	No	No	5
DNA2	0.485158	0.766148	-0.28099	0.0735294	0.143635	-0.0701054	#N/A	#N/A	#N/A	0.0465585	0.0657918	-0.0192333	0.53855	0.55216	-0.0136092	#N/A	#N/A	#N/A	0	No	No	1
DNAH1	0.841598	0.858249	-0.0166507	0.683099	0.708332	-0.0252328	0.279003	0.238761	0.0402419	#N/A	#N/A	#N/A	0.827311	0.625729	0.201582	#N/A	#N/A	#N/A	1	No	No	0
DNAH12	0.417027	0.631391	-0.214364	0.031182	0.0431517	-0.0119698	0.191186	0.152406	0.0387795	0.147894	0.0852433	0.0626504	0.73829	0.830206	-0.0919165	#N/A	#N/A	#N/A	0	No	No	1
DNAH3	0.453151	0.177332	0.275819	0.297199	0.0822966	0.214903	#N/A	#N/A	#N/A	0.139947	0.0500948	0.089852	0.356998	0.541256	-0.184258	#N/A	#N/A	#N/A	2	No	No	0
DNAH5	0.496352	0.889598	-0.393246	#N/A	#N/A	#N/A	0.644825	0.858946	-0.214121	0.541751	0.85068	-0.308929	0.360864	0.804861	-0.443997	#N/A	#N/A	#N/A	0	No	No	4
DNAH8	0.39562	0.816702	-0.421082	0.23421	0.759552	-0.525342	0.831852	0.936446	-0.104594	0.831852	0.936446	-0.104594	0.357868	0.720547	-0.36268	0.538214	0.652393	-0.114179	0	No	No	3
DNAH9	0.340314	0.567763	-0.227449	0.111908	0.19014	-0.0782322	0.188871	0.644568	-0.455696	0.0689592	0.199054	-0.130095	0.277765	0.756478	-0.478713	0.836831	0.907768	-0.0709367	0	No	No	3
DNAI2	0.626411	0.739346	-0.112934	0.503507	0.618199	-0.114692	0.40688	0.447281	-0.040401	0.301001	0.198175	0.102826	0.514041	0.756265	-0.242224	0.301519	0.482679	-0.18116	0	No	No	1
DNAJA3	0.0930714	0.207878	-0.114806	0.0410652	0.0464054	-0.00534024	#N/A	#N/A	#N/A	0.0574977	0.0660478	-0.00855014	0.495004	0.500478	-0.00547376	0.230318	0.591168	-0.36085	0	No	No	1
DNAJB12	0.49684	0.594302	-0.0974619	0.0861762	0.0863693	-0.000193105	0.0467067	0.0481868	-0.00148019	0.058051	0.0601444	-0.00209336	0.272483	0.27152	0.0009626	0.455591	0.168012	0.28758	1	No	No	0
DNAJB3	0.252261	0.904296	-0.652035	0.651386	0.891542	-0.240156	0.323067	0.893331	-0.570263	0.423645	0.935672	-0.512027	#N/A	#N/A	#N/A	0.341158	0.939944	-0.598786	0	No	No	5
DNAJB8	0.673708	0.868598	-0.194891	#N/A	#N/A	#N/A	0.650179	0.774571	-0.124392	0.48354	0.756341	-0.272801	0.913326	0.908167	0.00515874	0.846169	0.877788	-0.0316193	0	No	No	1
DNAJC2	0.123996	0.372949	-0.248954	0.158536	0.311564	-0.153028	0.0570026	0.0571906	-0.000188053	0.058417	0.0615883	-0.00317128	0.480855	0.467383	0.0134724	#N/A	#N/A	#N/A	0	No	No	1
DNAJC5B	0.710945	0.910939	-0.199994	#N/A	#N/A	#N/A	0.118179	0.680738	-0.562559	#N/A	#N/A	#N/A	0.0647763	0.0786778	-0.0139015	0.100976	0.615486	-0.514509	0	No	No	2
DNAJC6	#N/A	#N/A	#N/A	0.0675153	0.0991009	-0.0315856	0.0752517	0.0817227	-0.00647099	0.0752517	0.0817227	-0.00647099	0.255086	0.298367	-0.0432812	0.537803	0.900287	-0.362484	0	No	No	1
DNALI1	0.508411	0.770737	-0.262326	0.142884	0.11231	0.0305743	0.0709154	0.0815329	-0.0106176	0.449965	0.163402	0.286564	0.605179	0.570745	0.0344337	0.941405	0.916611	0.0247943	1	No	No	1
DNASE1L2	0.882912	0.906311	-0.0233995	0.360808	0.172137	0.188671	0.489896	0.141752	0.348145	0.534209	0.215423	0.318786	0.647371	0.350474	0.296897	0.846983	0.825369	0.0216141	3	Yes	No	0
DNASE2	0.346478	0.657378	-0.3109	0.0306576	0.034535	-0.00387744	0.0779398	0.098356	-0.0204162	0.0713241	0.08787	-0.0165459	0.0725188	0.0582798	0.0142391	0.804342	0.726874	0.0774679	0	No	No	1
DND1	0.827891	0.85082	-0.0229287	0.9048	0.64425	0.26055	#N/A	#N/A	#N/A	#N/A	#N/A	#N/A	0.837316	0.651074	0.186242	#N/A	#N/A	#N/A	1	No	No	0
DNER	0.175874	0.243541	-0.0676669	0.039236	0.0563913	-0.0171553	#N/A	#N/A	#N/A	#N/A	#N/A	#N/A	0.283548	0.536796	-0.253248	0.790873	0.916931	-0.126058	0	Yes	No	1
DNHD1	0.792197	0.64623	0.145968	0.637793	0.410913	0.22688	0.802528	0.460476	0.342052	0.648426	0.316488	0.331938	0.730861	0.660241	0.0706199	0.830763	0.931449	-0.100686	3	No	No	0
DNM1	0.353443	0.636947	-0.283504	0.0868056	0.100038	-0.0132323	#N/A	#N/A	#N/A	0.0478397	0.0604799	-0.0126401	0.730059	0.620785	0.109274	0.739698	0.703503	0.0361954	0	Yes	No	1
DNMT3L	0.30692	0.506106	-0.199186	#N/A	#N/A	#N/A	0.23891	0.621945	-0.383035	0.23891	0.621945	-0.383035	0.697163	0.848655	-0.151492	#N/A	#N/A	#N/A	0	No	No	2
DNTT	0.420609	0.827301	-0.406693	0.668786	0.9145	-0.245714	0.261703	0.528991	-0.267288	0.356039	0.712951	-0.356912	0.117853	0.145444	-0.0275915	0.40042	0.788964	-0.388544	0	No	No	5
DOC2A	0.380232	0.286351	0.0938812	0.0050781	0.00984018	-0.00476208	0.128799	0.127688	0.00111167	0.0619931	0.0710609	-0.00906784	0.572508	0.769253	-0.196744	0.443001	0.676986	-0.233985	0	No	No	1
DOCK2	0.486524	0.2907	0.195823	0.311301	0.151459	0.159842	#N/A	#N/A	#N/A	#N/A	#N/A	#N/A	0.530514	0.636451	-0.105937	0.458982	0.827007	-0.368025	0	No	No	1
DOCK3	0.198624	0.192221	0.00640289	#N/A	#N/A	#N/A	#N/A	#N/A	#N/A	#N/A	#N/A	#N/A	0.482252	0.691522	-0.20927	0.744009	0.873933	-0.129924	0	No	No	1
DOCK5	0.0520321	0.070787	-0.0187549	#N/A	#N/A	#N/A	0.00804587	0.011003	-0.00295714	0.00804587	0.011003	-0.00295714	0.602586	0.698991	-0.0964055	0.42289	0.767908	-0.345018	0	No	No	1
DOCK9	0.295414	0.291749	0.00366496	0.346127	0.157855	0.188273	0.544772	0.205348	0.339424	0.274766	0.103095	0.171671	0.6568	0.640252	0.016548	0.893833	0.905529	-0.0116961	1	No	No	0
DOK4	0.937614	0.918155	0.0194592	0.00824868	0.0108221	-0.00257345	0.0236241	0.0310906	-0.00746655	#N/A	#N/A	#N/A	0.509601	0.479698	0.0299028	0.594563	0.381113	0.21345	1	No	No	0
DOK7	0.345388	0.288507	0.0568803	0.22026	0.056946	0.163314	0.235928	0.0651577	0.17077	0.235928	0.0651577	0.17077	0.403717	0.637961	-0.234244	0.288439	0.602234	-0.313795	0	No	No	2
DOPEY1	0.237753	0.544752	-0.306999	0.0155792	0.0266025	-0.0110233	0.0204469	0.0219558	-0.00150896	0.0188787	0.0253529	-0.00647419	0.940924	0.921372	0.0195524	0.666514	0.88766	-0.221147	0	No	No	2
DPCR1	0.548241	0.454239	0.0940019	0.580762	0.784397	-0.203635	#N/A	#N/A	#N/A	#N/A	#N/A	#N/A	0.514212	0.650664	-0.136452	0.500145	0.574456	-0.0743111	0	No	No	1
DPEP1	0.694345	0.71328	-0.0189351	0.40355	0.431211	-0.0276613	0.493952	0.644978	-0.151026	0.378647	0.524166	-0.145518	0.404215	0.687099	-0.282884	0.713949	0.884384	-0.170435	0	No	No	1
DPF1	0.155613	0.190793	-0.0351799	#N/A	#N/A	#N/A	0.333272	0.285763	0.0475089	0.0492811	0.0690164	-0.0197353	0.573332	0.515458	0.0578748	0.325737	0.0143301	0.311407	1	No	No	0
DPP10	0.0939303	0.0507295	0.0432008	#N/A	#N/A	#N/A	0.12602	0.10529	0.0207299	0.145008	0.0908385	0.0541692	0.256556	0.531909	-0.275353	0.230477	0.762778	-0.532301	0	Yes	No	2
DPP3	0.0309123	0.0347986	-0.00388625	0.00946755	0.0142237	-0.00475617	0.206584	0.153903	0.052681	#N/A	#N/A	#N/A	0.85691	0.860198	-0.00328812	0.455883	0.756577	-0.300695	0	No	No	1
DPP4	0.725788	0.832972	-0.107184	0.417159	0.501417	-0.0842587	0.0630454	0.0852063	-0.0221609	0.0630454	0.0852063	-0.0221609	0.433827	0.452048	-0.0182215	0.364594	0.801189	-0.436594	0	No	No	1
DPP6	0.176461	0.153301	0.0231598	0.0916323	0.125021	-0.0333886	0.100123	0.114055	-0.013932	0.0917583	0.137274	-0.045516	0.316064	0.667777	-0.351714	0.398021	0.785325	-0.387305	0	No	No	2
DPPA2	0.444966	0.800107	-0.355141	0.673318	0.855904	-0.182587	0.368748	0.799456	-0.430708	0.192164	0.616344	-0.424179	#N/A	#N/A	#N/A	0.449516	0.673827	-0.224311	0	No	No	4
DPPA3	0.304414	0.763076	-0.458663	0.273922	0.832958	-0.559035	0.141148	0.498594	-0.357446	0.141148	0.498594	-0.357446	0.425371	0.878866	-0.453495	#N/A	#N/A	#N/A	0	No	No	5
DPPA4	0.309257	0.675835	-0.366578	0.566077	0.763244	-0.197167	#N/A	#N/A	#N/A	0.779579	0.900571	-0.120991	0.561567	0.827118	-0.265551	#N/A	#N/A	#N/A	0	No	No	2
DPPA5	0.532722	0.793034	-0.260312	0.682363	0.816181	-0.133818	#N/A	#N/A	#N/A	#N/A	#N/A	#N/A	0.746107	0.801311	-0.0552041	0.489299	0.776289	-0.28699	0	No	No	2
DPRX	0.347266	0.874544	-0.527278	0.485037	0.871241	-0.386203	0.339739	0.854341	-0.514603	0.339739	0.854341	-0.514603	0.437157	0.893335	-0.456178	#N/A	#N/A	#N/A	0	No	No	5
DPT	0.812839	0.841255	-0.0284156	0.42532	0.445212	-0.0198923	#N/A	#N/A	#N/A	0.561193	0.616691	-0.0554976	0.854441	0.862435	-0.00799397	0.53642	0.837025	-0.300606	0	No	No	1
DPYS	0.653453	0.795256	-0.141803	0.120841	0.147118	-0.0262763	0.0546126	0.107036	-0.052423	0.0393036	0.0687596	-0.029456	0.51552	0.64085	-0.125331	0.210415	0.611106	-0.400691	0	No	No	1
DPYSL4	0.150275	0.150947	-0.000672807	0.0382566	0.0329708	0.00528576	#N/A	#N/A	#N/A	#N/A	#N/A	#N/A	0.430417	0.651589	-0.221171	0.523665	0.737266	-0.213601	0	No	No	2
DRD1	0.145727	0.197635	-0.0519078	0.051143	0.0656662	-0.0145232	0.0679049	0.0863943	-0.0184894	0.0679049	0.0863943	-0.0184894	0.459044	0.812571	-0.353526	#N/A	#N/A	#N/A	0	No	No	1
DRD3	0.155018	0.54979	-0.394772	#N/A	#N/A	#N/A	0.37585	0.466535	-0.0906849	0.37585	0.466535	-0.0906849	0.365186	0.43051	-0.0653239	#N/A	#N/A	#N/A	0	No	No	1
DRD4	0.559222	0.359631	0.199591	0.296793	0.0718362	0.224957	#N/A	#N/A	#N/A	0.252498	0.14257	0.109928	0.707418	0.611264	0.0961535	0.912781	0.806971	0.10581	1	Yes	No	0
DRGX	0.25036	0.804082	-0.553722	#N/A	#N/A	#N/A	#N/A	#N/A	#N/A	0.223047	0.889621	-0.666574	0.341375	0.611983	-0.270608	#N/A	#N/A	#N/A	0	No	No	3
DSC1	0.484667	0.490804	-0.0061372	#N/A	#N/A	#N/A	0.519432	0.776345	-0.256914	0.519432	0.776345	-0.256914	0.301403	0.489646	-0.188242	#N/A	#N/A	#N/A	0	No	No	2
DSC2	0.486808	0.807368	-0.32056	0.203038	0.236547	-0.0335092	0.0421641	0.0585363	-0.0163722	0.0421641	0.0585363	-0.0163722	0.23059	0.311563	-0.0809725	#N/A	#N/A	#N/A	0	No	No	1
DSC3	0.354473	0.439393	-0.0849198	0.163488	0.0392869	0.124201	0.231356	0.12943	0.101927	0.265235	0.14794	0.117295	0.177249	0.142198	0.0350506	0.527744	0.868165	-0.340421	0	Yes	No	1
DSCAM	0.38981	0.593634	-0.203824	0.127801	0.172694	-0.0448931	0.0858642	0.0728541	0.01301	0.0948738	0.0762167	0.0186571	0.378938	0.69669	-0.317752	0.512203	0.928384	-0.416181	0	No	No	3
DSCAML1	0.391349	0.46366	-0.0723108	0.0871994	0.0928688	-0.00566938	#N/A	#N/A	#N/A	0.131318	0.0424379	0.0888804	0.623468	0.790028	-0.16656	0.407527	0.724622	-0.317095	0	Yes	No	1
DSCR4	0.426909	0.826531	-0.399622	0.52631	0.809374	-0.283064	0.432122	0.847953	-0.415831	0.479853	0.882744	-0.40289	0.348931	0.760542	-0.411611	0.431403	0.955692	-0.524289	0	No	No	6
DSCR6	0.581407	0.341296	0.240111	#N/A	#N/A	#N/A	0.00383535	0.0050001	-0.00116475	0.00383535	0.0050001	-0.00116475	0.279163	0.236973	0.0421902	0.157376	0.498289	-0.340913	1	No	No	1
DSCR8	0.421169	0.909352	-0.488183	0.554204	0.830977	-0.276773	#N/A	#N/A	#N/A	#N/A	#N/A	#N/A	0.425487	0.833034	-0.407547	#N/A	#N/A	#N/A	0	No	No	3
DSCR9	0.443828	0.447275	-0.00344768	0.617972	0.485719	0.132253	#N/A	#N/A	#N/A	#N/A	#N/A	#N/A	0.363316	0.642763	-0.279447	#N/A	#N/A	#N/A	0	No	No	1
DSG1	0.429273	0.803818	-0.374545	0.470881	0.870416	-0.399535	#N/A	#N/A	#N/A	#N/A	#N/A	#N/A	0.416872	0.859367	-0.442495	0.477492	0.838761	-0.361269	0	No	No	4
DSG2	0.876459	0.736904	0.139555	0.867176	0.20882	0.658357	#N/A	#N/A	#N/A	0.0109044	0.0184717	-0.00756734	0.351453	0.409829	-0.058376	0.794799	0.898111	-0.103312	1	No	No	0
DSG4	0.76204	0.947494	-0.185454	#N/A	#N/A	#N/A	0.456277	0.911606	-0.455329	0.456277	0.911606	-0.455329	0.537705	0.941382	-0.403678	#N/A	#N/A	#N/A	0	No	No	3
DTHD1	0.564897	0.749735	-0.184838	0.569688	0.764168	-0.19448	0.627616	0.880739	-0.253123	0.627616	0.880739	-0.253123	0.601699	0.814254	-0.212555	#N/A	#N/A	#N/A	0	No	No	3
DUSP21	0.614538	0.815956	-0.201418	0.734775	0.778312	-0.0435364	0.730486	0.921787	-0.191301	0.765458	0.915212	-0.149755	#N/A	#N/A	#N/A	0.63044	0.911611	-0.28117	0	No	No	2
DUSP22	0.470467	0.557699	-0.0872315	0.489867	0.453184	0.0366829	0.402839	0.47287	-0.0700305	0.402839	0.47287	-0.0700305	0.435093	0.678698	-0.243605	0.536083	0.813458	-0.277375	0	No	No	2
DUSP26	0.609549	0.791669	-0.18212	0.0486739	0.051319	-0.00264503	0.0800991	0.0928417	-0.0127426	0.0339506	0.0392238	-0.00527315	0.896967	0.948523	-0.0515552	0.578285	0.843005	-0.264721	0	No	No	1
DUSP27	0.674512	0.780854	-0.106342	0.498559	0.865463	-0.366904	#N/A	#N/A	#N/A	0.461005	0.827653	-0.366648	0.4685	0.491973	-0.0234724	0.169807	0.464068	-0.294261	0	No	No	3
DUXA	0.828041	0.927267	-0.0992258	0.677948	0.8423	-0.164351	#N/A	#N/A	#N/A	0.602409	0.890162	-0.287753	0.169875	0.612391	-0.442517	0.311839	0.850534	-0.538695	0	No	No	3
DYDC1	0.100354	0.114179	-0.0138258	0.0454812	0.0341662	0.011315	0.164088	0.19976	-0.0356725	#N/A	#N/A	#N/A	0.596638	0.883139	-0.2865	#N/A	#N/A	#N/A	0	No	No	1
DYDC2	0.353269	0.445712	-0.0924428	0.0736567	0.0473459	0.0263107	0.24847	0.268441	-0.0199712	0.0719309	0.0526488	0.0192821	0.328776	0.68181	-0.353033	0.606175	0.812437	-0.206262	0	No	No	2
DYM	0.326251	0.689791	-0.36354	0.0318226	0.0421169	-0.0102943	0.372541	0.367565	0.00497585	0.0659119	0.0831137	-0.0172018	0.907458	0.89628	0.0111783	0.880223	0.882452	-0.00222813	0	No	No	1
DYNC1H1	0.209102	0.227015	-0.0179126	0.0750434	0.083369	-0.00832558	0.0127117	0.0218915	-0.00917972	0.00985742	0.0164931	-0.00663567	0.814266	0.806773	0.00749228	0.632313	0.373061	0.259251	1	No	No	0
DYNC1I1	0.680473	0.78347	-0.102997	0.0495249	0.0487226	0.000802286	0.208853	0.361832	-0.152978	0.0153702	0.0392853	-0.0239151	0.343198	0.550755	-0.207558	0.76827	0.898185	-0.129915	0	No	No	1
DYNLRB1	0.314468	0.0718022	0.242665	0.0446175	0.0455527	-0.000935158	0.0462225	0.0456758	0.000546728	0.0462225	0.0456758	0.000546728	0.24844	0.231685	0.0167548	0.795593	0.583146	0.212447	2	No	No	0
DYNLRB2	0.035455	0.0463884	-0.0109334	0.0195896	0.0160417	0.00354791	0.00727774	0.00629008	0.000987657	0.00727774	0.00629008	0.000987657	0.422062	0.50435	-0.0822883	0.653232	0.939034	-0.285802	0	No	No	1
DYNLT3	0.341947	0.464726	-0.122779	0.209761	0.390068	-0.180307	0.191928	0.392832	-0.200904	0.174146	0.406521	-0.232375	0.249783	0.493097	-0.243314	0.648952	0.638377	0.0105749	0	No	No	3
DYRK1B	0.84724	0.629009	0.218231	0.20983	0.0393677	0.170462	0.257373	0.176821	0.0805522	0.163706	0.0463957	0.117311	0.92756	0.841189	0.0863704	0.83696	0.784552	0.0524084	1	No	No	0
DYRK4	0.435277	0.943109	-0.507832	0.380531	0.749169	-0.368638	0.197007	0.596836	-0.399829	#N/A	#N/A	#N/A	0.0444322	0.0986827	-0.0542505	#N/A	#N/A	#N/A	0	No	No	3
DYTN	0.729527	0.905467	-0.175939	#N/A	#N/A	#N/A	#N/A	#N/A	#N/A	#N/A	#N/A	#N/A	0.209867	0.490467	-0.2806	#N/A	#N/A	#N/A	0	No	No	1
E2F5	0.211063	0.277955	-0.0668922	0.021462	0.021828	-0.000365968	0.398671	0.785404	-0.386733	0.252586	0.300974	-0.0483887	0.413175	0.556919	-0.143743	#N/A	#N/A	#N/A	0	No	No	1
EAPP	0.390429	0.744269	-0.35384	#N/A	#N/A	#N/A	0.0435754	0.0476524	-0.00407694	0.0435754	0.0476524	-0.00407694	0.260588	0.251684	0.00890461	#N/A	#N/A	#N/A	0	No	No	1
EBF2	0.0375708	0.0792234	-0.0416526	0.106504	0.388166	-0.281662	#N/A	#N/A	#N/A	0.00712775	0.0185772	-0.0114494	0.470478	0.388266	0.0822118	#N/A	#N/A	#N/A	0	Yes	No	1
EBI3	0.193161	0.301679	-0.108518	0.0373151	0.0365863	0.00072889	#N/A	#N/A	#N/A	#N/A	#N/A	#N/A	0.319974	0.650954	-0.33098	0.613193	0.846971	-0.233777	0	No	No	2
EBPL	0.20732	0.414573	-0.207253	0.0313223	0.0358647	-0.00454235	#N/A	#N/A	#N/A	0.0402543	0.0502412	-0.00998694	0.655115	0.686149	-0.0310344	0.919007	0.93147	-0.0124629	0	No	No	1
ECE2	0.240463	0.253563	-0.0130999	0.0508684	0.0629185	-0.0120501	#N/A	#N/A	#N/A	0.00928695	0.0150652	-0.00577828	0.301218	0.344525	-0.0433065	0.402225	0.63703	-0.234806	0	Yes	No	1
ECEL1	0.553847	0.613923	-0.0600756	#N/A	#N/A	#N/A	0.153461	0.135128	0.0183326	#N/A	#N/A	#N/A	0.284712	0.378937	-0.0942251	0.360502	0.730426	-0.369924	0	No	No	1
ECHDC2	0.564101	0.64697	-0.0828689	0.0787904	0.0725939	0.00619657	0.0672933	0.0449644	0.0223289	0.0672933	0.0449644	0.0223289	0.560055	0.519025	0.0410293	0.638057	0.371015	0.267042	1	No	No	0
ECM1	0.85005	0.851081	-0.00103122	#N/A	#N/A	#N/A	0.379061	0.151809	0.227252	0.379061	0.151809	0.227252	0.668912	0.69972	-0.0308077	0.72989	0.74183	-0.0119398	2	No	No	0
EDA	0.234965	0.500476	-0.265511	0.239133	0.550072	-0.310939	0.404167	0.459964	-0.0557972	0.335639	0.440471	-0.104832	0.34209	0.564049	-0.221959	0.315316	0.517783	-0.202468	0	No	No	4
EDA2R	0.497208	0.856975	-0.359767	0.514064	0.766487	-0.252422	#N/A	#N/A	#N/A	0.63126	0.801359	-0.170099	0.262567	0.844429	-0.581862	0.481854	0.835851	-0.353997	0	No	No	4
EDAR	0.602731	0.711466	-0.108736	0.307598	0.342648	-0.0350499	0.649278	0.798633	-0.149355	0.136723	0.271056	-0.134333	0.258889	0.482431	-0.223542	0.749644	0.899852	-0.150208	0	No	No	1
EDARADD	0.28699	0.540409	-0.253419	0.0931369	0.160192	-0.0670546	0.208554	0.373165	-0.164611	0.194886	0.459753	-0.264867	0.221244	0.304636	-0.0833914	0.633131	0.896512	-0.263381	0	No	No	3
EDEM3	0.0486202	0.0514161	-0.00279591	0.0333866	0.043664	-0.0102775	0.00367395	0.00915184	-0.00547789	0.00367395	0.00915184	-0.00547789	0.391278	0.377186	0.0140926	0.553649	0.920534	-0.366885	0	No	No	1
EDN3	0.0674516	0.127783	-0.0603316	0.0635991	0.0603055	0.0032936	0.0618088	0.0447004	0.0171084	0.0618088	0.0447004	0.0171084	0.16383	0.449855	-0.286024	0.194849	0.718568	-0.523719	0	Yes	No	2
EEF1A2	0.290469	0.377765	-0.0872957	0.0344466	0.0147941	0.0196525	0.0492588	0.0690406	-0.0197818	0.0796405	0.124286	-0.0446457	0.37389	0.612132	-0.238242	0.134325	0.119889	0.0144358	0	Yes	No	1
EEF1AL7	#N/A	#N/A	#N/A	0.42681	0.911075	-0.484266	#N/A	#N/A	#N/A	#N/A	#N/A	#N/A	0.493527	0.584801	-0.0912738	#N/A	#N/A	#N/A	0	No	No	1
EEF2K	0.233029	0.228726	0.00430269	0.0291624	0.0371468	-0.00798439	0.306634	0.252809	0.0538245	0.0080412	0.0115605	-0.00351932	0.913609	0.907077	0.00653265	0.87552	0.53748	0.338041	1	No	No	0
EFCAB3	0.493449	0.748684	-0.255236	#N/A	#N/A	#N/A	0.477457	0.714106	-0.236649	0.802308	0.901327	-0.0990192	0.485453	0.731395	-0.245942	#N/A	#N/A	#N/A	0	No	No	3
EFCAB6	0.0415603	0.0445621	-0.0030018	0.0345139	0.0499229	-0.0154089	0.551632	0.594334	-0.0427019	#N/A	#N/A	#N/A	0.315002	0.382694	-0.0676921	0.360939	0.727728	-0.366789	0	No	No	1
EFCAB8	0.825943	0.793273	0.0326702	0.47842	0.669802	-0.191383	0.518734	0.603147	-0.0844125	#N/A	#N/A	#N/A	0.540792	0.792253	-0.251462	#N/A	#N/A	#N/A	0	No	No	1
EFCAB9	0.467347	0.600088	-0.132741	0.590266	0.892796	-0.302529	#N/A	#N/A	#N/A	0.463109	0.810672	-0.347563	0.790979	0.894583	-0.103604	#N/A	#N/A	#N/A	0	No	No	2
EFEMP1	0.139059	0.147252	-0.00819338	0.186307	0.0647177	0.121589	0.325099	0.121966	0.203134	0.3514	0.115985	0.235415	0.776996	0.825044	-0.0480481	#N/A	#N/A	#N/A	2	No	No	0
EFHB	0.252493	0.63969	-0.387197	0.605714	0.763362	-0.157648	0.297345	0.673669	-0.376324	0.230079	0.611274	-0.381195	0.113962	0.107612	0.00634999	#N/A	#N/A	#N/A	0	No	No	3
EFHD1	0.368125	0.432402	-0.0642773	0.0278211	0.0345211	-0.00669993	0.0136164	0.0267559	-0.0131395	0.187407	0.0543472	0.13306	0.258848	0.265121	-0.00627282	0.535897	0.905496	-0.369599	0	No	No	1
EFNB2	0.0296325	0.0421564	-0.0125239	0.046544	0.0574605	-0.0109165	#N/A	#N/A	#N/A	0.0655181	0.073059	-0.00754087	0.56112	0.528661	0.0324597	0.844358	0.605192	0.239166	1	No	No	0
EFTUD2	0.0721141	0.095959	-0.0238448	0.07586	0.093975	-0.0181151	0.166591	0.156956	0.00963457	0.0318356	0.0415585	-0.00972286	0.894594	0.830063	0.0645311	0.746526	0.480086	0.26644	1	No	No	0
EGF	0.647759	0.764002	-0.116242	0.0554048	0.0948125	-0.0394077	0.454272	0.669777	-0.215505	0.56099	0.760262	-0.199272	0.612639	0.627076	-0.0144364	0.931664	0.934213	-0.00254923	0	No	No	1
EGFL7	0.373641	0.588126	-0.214485	#N/A	#N/A	#N/A	0.264258	0.343961	-0.0797025	0.508344	0.716484	-0.20814	0.333728	0.596295	-0.262567	#N/A	#N/A	#N/A	0	No	No	3
EGFR	0.432254	0.21127	0.220984	#N/A	#N/A	#N/A	0.0189759	0.0302516	-0.0112757	0.0189759	0.0302516	-0.0112757	0.746368	0.713293	0.0330752	0.903898	0.902939	0.000958467	1	Yes	No	0
EGLN2	0.0595691	0.0700076	-0.0104385	0.0908801	0.0636302	0.0272499	0.293605	0.184043	0.109563	0.700145	0.56212	0.138024	0.628205	0.425715	0.202491	0.770951	0.617546	0.153405	1	No	No	0
EGR3	0.0541154	0.0547259	-0.000610465	0.0152139	0.0195341	-0.00432013	0.0293135	0.0194594	0.00985408	0.0366244	0.0368286	-0.000204228	0.509661	0.307871	0.20179	0.836208	0.77147	0.0647379	1	Yes	No	0
EGR4	0.123002	0.367896	-0.244894	#N/A	#N/A	#N/A	0.0335426	0.0384827	-0.00494009	0.0559708	0.0653346	-0.00936387	0.171864	0.153069	0.0187947	0.0407579	0.0971471	-0.0563892	0	Yes	No	1
EHD3	0.641445	0.705201	-0.0637554	0.0405971	0.0529928	-0.0123957	0.032796	0.0400903	-0.00729428	0.100325	0.0927765	0.00754801	0.757945	0.823187	-0.0652423	0.430111	0.666855	-0.236744	0	No	No	1
EHF	0.351689	0.659098	-0.307409	#N/A	#N/A	#N/A	0.470165	0.675029	-0.204864	#N/A	#N/A	#N/A	0.61049	0.71402	-0.103531	0.739309	0.884098	-0.144788	0	No	No	2
EIF2AK4	0.26331	0.557683	-0.294373	0.00330554	0.00416901	-0.000863475	#N/A	#N/A	#N/A	0.0472512	0.0569652	-0.00971398	0.595299	0.555448	0.0398516	#N/A	#N/A	#N/A	0	No	No	1
EIF2S3	0.0930249	0.128589	-0.0355637	0.156677	0.202342	-0.0456656	#N/A	#N/A	#N/A	0.120766	0.17541	-0.0546433	0.0344315	0.14438	-0.109948	0.54293	0.850351	-0.307421	0	No	No	1
EIF3IP1	0.429619	0.909381	-0.479762	0.562294	0.939884	-0.37759	#N/A	#N/A	#N/A	#N/A	#N/A	#N/A	#N/A	#N/A	#N/A	#N/A	#N/A	#N/A	0	No	No	2
EIF4EBP2	0.196361	0.24001	-0.0436484	0.0184206	0.0281159	-0.00969531	0.0132475	0.0222078	-0.00896032	0.0132475	0.0222078	-0.00896032	0.30947	0.344232	-0.0347613	0.928537	0.653048	0.275489	1	No	No	0
EIF5A2	0.472472	0.731646	-0.259174	0.0403438	0.0520848	-0.011741	0.0506842	0.0596311	-0.00894688	0.0432878	0.0655681	-0.0222803	0.559979	0.644818	-0.0848389	#N/A	#N/A	#N/A	0	No	No	1
EIF5AL1	0.765178	0.848209	-0.0830318	#N/A	#N/A	#N/A	#N/A	#N/A	#N/A	0.872155	0.652742	0.219413	#N/A	#N/A	#N/A	0.872155	0.652742	0.219413	2	No	No	0
ELANE	0.147696	0.33326	-0.185564	0.418683	0.771171	-0.352488	0.777585	0.963513	-0.185928	0.777585	0.963513	-0.185928	0.335414	0.541316	-0.205902	#N/A	#N/A	#N/A	0	No	No	2
ELAVL4	0.288102	0.793078	-0.504975	0.252957	0.496864	-0.243907	0.405206	0.432756	-0.0275499	0.405206	0.432756	-0.0275499	0.336185	0.618192	-0.282006	0.770385	0.894236	-0.123851	0	No	No	3
ELF1	0.775691	0.73393	0.0417611	0.374482	0.547968	-0.173487	0.612128	0.668556	-0.0564286	0.177268	0.474398	-0.29713	0.377978	0.350435	0.0275434	#N/A	#N/A	#N/A	0	Yes	No	1
ELFN1	0.792647	0.78377	0.00887707	0.728049	0.846464	-0.118415	0.479156	0.589073	-0.109917	0.768547	0.929012	-0.160465	0.896522	0.909242	-0.01272	0.552623	0.820386	-0.267763	0	No	No	1
ELFN2	0.334783	0.41164	-0.0768564	0.0628372	0.0876677	-0.0248305	0.283561	0.352313	-0.0687515	#N/A	#N/A	#N/A	0.681163	0.856071	-0.174908	0.619419	0.889141	-0.269722	0	No	No	1
ELK4	0.804361	0.849002	-0.0446416	0.622785	0.401409	0.221376	0.125967	0.133025	-0.00705808	0.0178331	0.0219308	-0.00409767	0.941616	0.912877	0.0287395	0.952547	0.89952	0.053027	1	No	No	0
ELMO1	0.307205	0.487235	-0.18003	0.184834	0.282533	-0.0976997	0.301667	0.552031	-0.250364	0.184154	0.340223	-0.156068	0.376942	0.683702	-0.30676	0.49633	0.924872	-0.428542	0	No	No	3
ELMO3	0.741775	0.576296	0.165479	0.712976	0.542607	0.170369	#N/A	#N/A	#N/A	0.778784	0.571908	0.206876	0.749411	0.682492	0.0669189	#N/A	#N/A	#N/A	1	No	No	0
ELMOD1	0.0994845	0.133491	-0.0340064	0.0514853	0.0707952	-0.0193098	0.170614	0.165475	0.00513887	0.0116792	0.0185807	-0.00690148	0.362957	0.571543	-0.208587	0.705438	0.806473	-0.101035	0	Yes	No	1
ELOVL2	0.502145	0.426476	0.0756689	#N/A	#N/A	#N/A	0.0071106	0.00909415	-0.00198355	0.0071106	0.00909415	-0.00198355	0.420587	0.59257	-0.171983	0.445994	0.745403	-0.299408	0	Yes	No	1
ELOVL7	0.844759	0.909744	-0.0649857	#N/A	#N/A	#N/A	0.234622	0.236777	-0.00215499	#N/A	#N/A	#N/A	0.170884	0.695203	-0.524319	0.51128	0.908456	-0.397176	0	No	No	2
ELP3	0.0366684	0.0463084	-0.00964001	0.0386449	0.0642213	-0.0255764	0.0280132	0.0301481	-0.00213494	0.0280132	0.0301481	-0.00213494	0.448056	0.439452	0.00860341	0.89317	0.592755	0.300414	1	No	No	0
ELSPBP1	#N/A	#N/A	#N/A	0.147794	0.199909	-0.0521145	0.492268	0.607383	-0.115115	0.144807	0.29993	-0.155123	0.709682	0.8782	-0.168518	0.253386	0.886395	-0.633009	0	No	No	1
ELTD1	0.495399	0.878085	-0.382686	0.51038	0.316369	0.194011	0.81441	0.204764	0.609647	0.81441	0.204764	0.609647	0.646619	0.529698	0.116921	#N/A	#N/A	#N/A	2	No	No	1
EMB	0.571228	0.61345	-0.0422221	0.0648638	0.0633795	0.00148428	0.0440413	0.0602189	-0.0161776	0.0440413	0.0602189	-0.0161776	0.421937	0.673288	-0.251351	#N/A	#N/A	#N/A	0	No	No	1
EMCN	0.301868	0.768476	-0.466608	#N/A	#N/A	#N/A	0.0607476	0.0390193	0.0217283	0.0607476	0.0390193	0.0217283	0.480229	0.818806	-0.338577	0.922594	0.91785	0.00474357	0	No	No	2
EMP3	0.331774	0.374903	-0.0431285	#N/A	#N/A	#N/A	0.0376406	0.080339	-0.0426984	0.0238786	0.0421587	-0.0182802	0.68563	0.463099	0.222531	0.796674	0.482981	0.313692	2	No	No	0
EMR1	#N/A	#N/A	#N/A	0.225148	0.859351	-0.634203	#N/A	#N/A	#N/A	#N/A	#N/A	#N/A	0.399361	0.741272	-0.341911	0.161383	0.657729	-0.496347	0	No	No	3
EMR2	0.161876	0.239158	-0.0772811	0.0663031	0.307744	-0.241441	0.0427912	0.0335696	0.00922159	#N/A	#N/A	#N/A	0.339015	0.517976	-0.178961	0.284007	0.818454	-0.534447	0	No	No	2
EMR3	0.417114	0.635452	-0.218338	0.0953644	0.669981	-0.574616	0.106631	0.790775	-0.684144	0.106631	0.790775	-0.684144	0.302933	0.764949	-0.462016	#N/A	#N/A	#N/A	0	No	No	5
EMR4P	0.475522	0.897143	-0.421621	0.163427	0.596223	-0.432795	#N/A	#N/A	#N/A	#N/A	#N/A	#N/A	0.104068	0.329058	-0.22499	#N/A	#N/A	#N/A	0	No	No	3
EMX2	0.0612485	0.0806587	-0.0194102	0.0308025	0.0493142	-0.0185118	0.0488153	0.0637115	-0.0148961	0.0488153	0.0637115	-0.0148961	0.225998	0.0884225	0.137575	0.546005	0.0577766	0.488228	1	No	No	0
EMX2OS	0.290112	0.0964617	0.193651	0.0358611	0.0416789	-0.00581782	#N/A	#N/A	#N/A	#N/A	#N/A	#N/A	0.345941	0.143255	0.202686	#N/A	#N/A	#N/A	1	No	No	0
EN2	0.0858771	0.0821175	0.00375951	#N/A	#N/A	#N/A	0.154773	0.0876159	0.0671576	0.164469	0.0895308	0.0749385	0.498856	0.188942	0.309914	0.324195	0.365021	-0.0408264	1	Yes	No	0
ENAM	#N/A	#N/A	#N/A	#N/A	#N/A	#N/A	#N/A	#N/A	#N/A	#N/A	#N/A	#N/A	0.616546	0.91932	-0.302774	0.500782	0.841991	-0.341209	0	No	No	2
ENDOG	0.236581	0.468658	-0.232077	0.0449077	0.0786632	-0.0337556	#N/A	#N/A	#N/A	0.0565534	0.0924502	-0.0358968	0.667126	0.62859	0.0385358	#N/A	#N/A	#N/A	0	No	No	1
ENKUR	0.0291223	0.0438606	-0.0147383	0.0120131	0.0153232	-0.00331008	0.0847033	0.0888393	-0.00413606	0.0847033	0.0888393	-0.00413606	0.780129	0.81514	-0.0350103	0.940246	0.555288	0.384958	1	No	No	0
ENPP3	0.801122	0.910211	-0.109089	#N/A	#N/A	#N/A	#N/A	#N/A	#N/A	0.622992	0.839472	-0.216479	0.543366	0.773731	-0.230365	#N/A	#N/A	#N/A	0	No	No	2
ENPP6	0.5695	0.88838	-0.31888	0.474062	0.857958	-0.383896	0.513387	0.616093	-0.102706	0.513387	0.616093	-0.102706	0.405458	0.553153	-0.147695	0.708738	0.907598	-0.198861	0	No	No	2
ENPP7	0.503175	0.843028	-0.339854	0.792836	0.902969	-0.110133	#N/A	#N/A	#N/A	0.596217	0.885437	-0.28922	0.576929	0.790174	-0.213245	0.396969	0.517984	-0.121015	0	No	No	3
ENSA	0.142696	0.219588	-0.0768922	0.0642413	0.0715485	-0.00730717	0.254993	0.313132	-0.0581396	0.254993	0.313132	-0.0581396	0.152682	0.14726	0.00542204	0.851317	0.648591	0.202726	1	No	No	0
ENTHD1	0.213815	0.682971	-0.469156	0.105631	0.640139	-0.534509	0.572094	0.820336	-0.248242	#N/A	#N/A	#N/A	0.526995	0.924346	-0.397352	0.258372	0.84583	-0.587458	0	No	No	5
ENTPD1	0.52091	0.744738	-0.223828	0.268222	0.586667	-0.318446	0.363637	0.450704	-0.087067	0.293331	0.381074	-0.0877434	0.383015	0.549804	-0.166789	0.906697	0.893621	0.0130762	0	No	No	2
ENTPD3	0.549986	0.589982	-0.0399959	0.156619	0.116632	0.0399864	0.109803	0.0722961	0.0375065	0.127032	0.0204348	0.106597	0.734348	0.899732	-0.165384	0.718545	0.948767	-0.230221	0	Yes	No	1
ENTPD8	0.274417	0.307002	-0.0325844	#N/A	#N/A	#N/A	0.210767	0.451574	-0.240806	0.0783754	0.0926242	-0.0142488	0.458075	0.549301	-0.0912261	0.617381	0.622451	-0.00507023	0	No	No	1
EPGN	#N/A	#N/A	#N/A	0.614348	0.849513	-0.235165	0.171487	0.472497	-0.301009	0.171487	0.472497	-0.301009	#N/A	#N/A	#N/A	#N/A	#N/A	#N/A	0	No	No	3
EPHA1	0.886062	0.701963	0.184099	0.52869	0.111604	0.417086	0.527814	0.102054	0.425759	0.631534	0.240428	0.391107	0.661153	0.653732	0.00742143	0.293474	0.445501	-0.152028	3	No	No	0
EPHA10	0.0608043	0.0995956	-0.0387913	0.205744	0.107214	0.0985299	0.0484332	0.0624752	-0.014042	0.0484332	0.0624752	-0.014042	0.279896	0.405502	-0.125605	0.396265	0.674258	-0.277993	0	Yes	No	1
EPHA6	0.0230239	0.0256449	-0.00262103	0.185637	0.249325	-0.0636877	0.690196	0.941751	-0.251555	0.205441	0.0920338	0.113407	0.572801	0.674192	-0.101391	0.814979	0.94464	-0.129662	0	No	No	1
EPHA8	0.258325	0.304456	-0.0461311	#N/A	#N/A	#N/A	0.0183785	0.010714	0.00766449	0.0183785	0.010714	0.00766449	0.360582	0.597704	-0.237122	0.200389	0.585275	-0.384886	0	No	No	2
EPHB6	0.0567739	0.0619779	-0.00520404	#N/A	#N/A	#N/A	0.517287	0.658549	-0.141262	0.0321418	0.0245959	0.00754584	0.632047	0.798069	-0.166022	0.454672	0.801883	-0.347211	0	No	No	1
EPHX3	0.812938	0.306374	0.506563	0.765524	0.287848	0.477676	0.689076	0.32273	0.366346	0.485316	0.320367	0.164949	0.408876	0.3655	0.0433756	0.601948	0.7236	-0.121652	3	No	No	0
EPS8L1	0.422601	0.565964	-0.143363	0.127374	0.173251	-0.0458772	#N/A	#N/A	#N/A	#N/A	#N/A	#N/A	0.280881	0.350498	-0.0696169	0.421669	0.201746	0.219923	1	No	No	0
EPS8L2	0.638558	0.426959	0.211599	0.0639665	0.0517549	0.0122116	0.25422	0.281019	-0.0267989	#N/A	#N/A	#N/A	0.334853	0.494	-0.159148	0.51449	0.536715	-0.0222247	1	No	No	0
EPX	0.772315	0.868308	-0.0959925	#N/A	#N/A	#N/A	0.562286	0.346576	0.21571	0.520097	0.327894	0.192203	0.621994	0.772299	-0.150306	0.253439	0.591184	-0.337746	1	No	No	1
ERAS	0.713447	0.750091	-0.0366442	0.454304	0.702047	-0.247743	0.471979	0.61203	-0.140051	0.50307	0.66825	-0.16518	#N/A	#N/A	#N/A	#N/A	#N/A	#N/A	0	No	No	1
ERBB4	0.0466661	0.0432788	0.00338725	0.0132514	0.0163915	-0.00314014	#N/A	#N/A	#N/A	0.0589511	0.0486779	0.0102732	0.375306	0.485251	-0.109945	0.474669	0.951784	-0.477115	0	Yes	No	1
ERC2	0.178052	0.200952	-0.0229002	#N/A	#N/A	#N/A	0.154288	0.363381	-0.209093	0.00642619	0.0125962	-0.00616996	0.522387	0.694252	-0.171865	0.638629	0.797489	-0.15886	0	No	No	1
ERLIN2	0.191072	0.185591	0.00548051	0.0200501	0.0331854	-0.0131352	0.0532937	0.0951977	-0.0419041	0.0358829	0.0530325	-0.0171496	0.405692	0.614	-0.208309	0.794177	0.771707	0.0224698	0	No	No	1
ERN2	0.294097	0.690659	-0.396561	0.524051	0.459112	0.0649382	0.145	0.179113	-0.0341129	0.116324	0.112096	0.00422782	0.371766	0.444882	-0.0731159	#N/A	#N/A	#N/A	0	No	No	1
ESM1	0.169891	0.553312	-0.383421	0.114845	0.431896	-0.317051	0.185003	0.64159	-0.456588	0.292696	0.609372	-0.316676	0.517159	0.95276	-0.435601	0.298266	0.847776	-0.549511	0	No	No	6
ESR2	0.150644	0.126815	0.0238295	0.0314367	0.0382036	-0.00676682	0.209185	0.248556	-0.0393713	0.0588567	0.0451797	0.013677	0.643447	0.871404	-0.227957	0.865916	0.930222	-0.0643052	0	No	No	1
ESRP2	0.428706	0.218297	0.210408	0.819782	0.176507	0.643275	0.761598	0.0129374	0.748661	0.766604	0.134227	0.632378	0.836536	0.544776	0.29176	0.562138	0.597631	-0.0354932	5	No	No	0
ESRRB	0.660483	0.875848	-0.215365	0.516805	0.736611	-0.219806	0.41155	0.515494	-0.103943	0.689997	0.865378	-0.175381	0.706857	0.871336	-0.164478	0.681134	0.9049	-0.223766	0	No	No	3
ESX1	0.337991	0.355036	-0.0170444	0.195414	0.317657	-0.122243	0.460612	0.35327	0.107342	0.460612	0.35327	0.107342	0.319327	0.431746	-0.112419	0.243666	0.716347	-0.472681	0	No	No	1
ETS2	0.158874	0.421603	-0.262729	0.00909549	0.00759596	0.00149954	0.0910263	0.128179	-0.0371532	0.0322969	0.042179	-0.00988206	0.855067	0.848481	0.00658537	0.530325	0.626163	-0.0958379	0	No	No	1
ETV1	0.0574133	0.082434	-0.0250207	0.0298337	0.0381962	-0.00836258	0.0590012	0.0718192	-0.0128179	0.0845085	0.0998547	-0.0153462	0.388897	0.602661	-0.213764	0.90378	0.918908	-0.0151282	0	No	No	1
ETV3L	0.58166	0.864936	-0.283277	0.484834	0.68779	-0.202956	0.663327	0.75127	-0.0879439	0.663327	0.75127	-0.0879439	0.788773	0.87079	-0.0820169	0.661609	0.788959	-0.12735	0	No	No	2
EVI2A	0.909815	0.921586	-0.0117711	0.611623	0.865189	-0.253566	0.526555	0.649039	-0.122484	#N/A	#N/A	#N/A	0.53536	0.736451	-0.201091	0.931637	0.941401	-0.0097644	0	No	No	2
EVI2B	0.651879	0.852908	-0.20103	#N/A	#N/A	#N/A	0.8557	0.887916	-0.0322158	#N/A	#N/A	#N/A	#N/A	#N/A	#N/A	#N/A	#N/A	#N/A	0	No	No	1
EVPL	0.67996	0.767794	-0.0878331	0.775553	0.531161	0.244393	0.786729	0.560475	0.226254	0.786729	0.560475	0.226254	0.672804	0.780598	-0.107794	0.426142	0.516681	-0.0905387	3	No	No	0
EVPLL	0.514372	0.69267	-0.178298	0.669273	0.817625	-0.148352	0.512124	0.734061	-0.221937	#N/A	#N/A	#N/A	0.486314	0.597883	-0.111569	0.589563	0.818759	-0.229196	0	No	No	2
EVX1	0.730983	0.341454	0.389529	0.596203	0.532443	0.0637594	0.324134	0.135881	0.188252	0.293839	0.13199	0.161848	0.534657	0.208344	0.326313	0.326486	0.077199	0.249287	3	Yes	No	0
EVX2	0.162559	0.16497	-0.00241124	0.44583	0.218432	0.227398	0.279896	0.334593	-0.0546975	0.276975	0.271201	0.00577367	0.286673	0.188171	0.0985016	#N/A	#N/A	#N/A	1	No	No	0
EXD2	0.896004	0.906665	-0.0106615	0.829605	0.871026	-0.0414205	0.879182	0.909046	-0.029864	#N/A	#N/A	#N/A	0.93342	0.870554	0.0628667	0.701837	0.489354	0.212483	1	No	No	0
EXOC1	0.516374	0.825295	-0.308921	0.0434638	0.0586177	-0.0151539	0.0458714	0.105984	-0.0601122	0.018226	0.0264512	-0.00822511	#N/A	#N/A	#N/A	#N/A	#N/A	#N/A	0	No	No	1
EXOC3L2	0.446016	0.352167	0.0938495	0.62931	0.425544	0.203766	0.638504	0.696814	-0.05831	#N/A	#N/A	#N/A	0.596676	0.533902	0.0627731	0.848539	0.810951	0.0375879	1	No	No	0
EXOG	0.362507	0.7532	-0.390693	0.0622772	0.0974342	-0.0351569	0.0435385	0.0737523	-0.0302139	0.0482624	0.0661038	-0.0178413	0.450284	0.491018	-0.0407338	0.679913	0.719692	-0.0397797	0	No	No	1
EXOSC10	0.0893022	0.292863	-0.203561	0.0247523	0.0313441	-0.00659179	0.016014	0.0251292	-0.00911514	0.0278568	0.0418724	-0.0140156	0.381297	0.347494	0.0338029	0.929935	0.931331	-0.00139563	0	No	No	1
EXOSC9	0.148251	0.482738	-0.334487	0.0155214	0.0243711	-0.00884967	0.0292397	0.0520426	-0.0228029	0.0257836	0.0389767	-0.0131932	0.0310924	0.0387597	-0.00766727	#N/A	#N/A	#N/A	0	No	No	1
EYA1	0.603018	0.79044	-0.187422	0.0733363	0.16303	-0.089694	0.214694	0.332818	-0.118124	0.0679612	0.134413	-0.0664519	0.94005	0.624593	0.315457	0.918475	0.937495	-0.0190194	1	No	No	0
EYS	#N/A	#N/A	#N/A	#N/A	#N/A	#N/A	0.480864	0.741779	-0.260915	#N/A	#N/A	#N/A	0.594927	0.821197	-0.22627	#N/A	#N/A	#N/A	0	No	No	2
EZH2	0.0654833	0.119823	-0.0543396	#N/A	#N/A	#N/A	0.419922	0.41281	0.00711162	0.0271507	0.0290874	-0.0019367	0.569595	0.571399	-0.00180424	0.569895	0.345296	0.224598	1	Yes	No	0
F11	0.491965	0.904995	-0.41303	0.592815	0.882117	-0.289302	0.16025	0.667756	-0.507506	0.16025	0.667756	-0.507506	0.317976	0.868327	-0.550352	0.243217	0.900154	-0.656937	0	No	No	6
F11R	0.378134	0.669763	-0.291629	0.099225	0.0729479	0.0262771	0.00390699	0.0131766	-0.0092696	0.00390699	0.0131766	-0.0092696	0.314719	0.409566	-0.0948477	0.354346	0.616448	-0.262102	0	No	No	2
F12	0.812012	0.892941	-0.0809289	0.853989	0.85133	0.00265863	0.84687	0.832323	0.0145461	0.836588	0.876985	-0.040397	0.185811	0.182369	0.00344193	0.954903	0.746985	0.207918	1	No	No	0
F13A1	0.428472	0.723307	-0.294834	0.102611	0.231966	-0.129355	0.261932	0.193834	0.0680985	0.0514482	0.095907	-0.0444588	0.427695	0.745587	-0.317892	0.25685	0.777107	-0.520257	0	No	No	3
F13B	0.451834	0.711661	-0.259827	#N/A	#N/A	#N/A	#N/A	#N/A	#N/A	#N/A	#N/A	#N/A	0.639735	0.840396	-0.200661	#N/A	#N/A	#N/A	0	No	No	2
F2RL1	0.250709	0.125242	0.125467	0.132931	0.0506213	0.0823095	0.243802	0.0663566	0.177445	0.243802	0.0663566	0.177445	0.816685	0.494807	0.321878	#N/A	#N/A	#N/A	1	No	No	0
F7	0.569427	0.753311	-0.183884	0.457375	0.578385	-0.121011	#N/A	#N/A	#N/A	#N/A	#N/A	#N/A	0.409754	0.574594	-0.164839	0.303795	0.791958	-0.488164	0	No	No	1
F9	0.580804	0.957817	-0.377013	0.212481	0.475685	-0.263203	#N/A	#N/A	#N/A	0.708287	0.932848	-0.224561	0.597583	0.575889	0.0216942	0.286158	0.768745	-0.482588	0	No	No	4
FA2H	0.09581	0.131569	-0.035759	0.00624144	0.00509961	0.00114183	0.0230964	0.0424263	-0.0193298	0.0230964	0.0424263	-0.0193298	0.458977	0.659026	-0.20005	0.569104	0.851807	-0.282703	0	No	No	2
FAAH	0.379776	0.685265	-0.305489	0.280759	0.271249	0.0095103	#N/A	#N/A	#N/A	#N/A	#N/A	#N/A	0.610267	0.605099	0.00516806	0.745686	0.801815	-0.0561293	0	No	No	1
FAAH2	0.20753	0.678916	-0.471386	0.111903	0.41112	-0.299217	0.0516236	0.30415	-0.252526	0.0516236	0.30415	-0.252526	0.338591	0.420045	-0.0814533	#N/A	#N/A	#N/A	0	No	No	4
FABP1	0.22519	0.859118	-0.633928	0.176343	0.312624	-0.136281	0.212503	0.345592	-0.133089	0.212503	0.345592	-0.133089	0.320673	0.902503	-0.58183	#N/A	#N/A	#N/A	0	No	No	2
FABP12	#N/A	#N/A	#N/A	#N/A	#N/A	#N/A	#N/A	#N/A	#N/A	#N/A	#N/A	#N/A	0.631271	0.870875	-0.239604	#N/A	#N/A	#N/A	0	No	No	1
FABP4	0.414881	0.898401	-0.48352	0.182167	0.260386	-0.0782195	#N/A	#N/A	#N/A	#N/A	#N/A	#N/A	#N/A	#N/A	#N/A	0.438579	0.941156	-0.502577	0	No	No	2
FABP7	0.665841	0.859129	-0.193289	0.423663	0.616643	-0.19298	0.376365	0.48721	-0.110845	0.376365	0.48721	-0.110845	0.312183	0.741593	-0.42941	#N/A	#N/A	#N/A	0	No	No	1
FABP9	0.138061	0.619118	-0.481057	0.322057	0.929411	-0.607354	#N/A	#N/A	#N/A	#N/A	#N/A	#N/A	0.232602	0.768566	-0.535964	#N/A	#N/A	#N/A	0	No	No	3
FADD	0.126341	0.459438	-0.333098	0.042057	0.0495402	-0.00748314	0.0261722	0.0326334	-0.00646117	0.0377309	0.0471237	-0.00939284	0.0569373	0.0677872	-0.0108499	0.733879	0.667974	0.0659045	0	No	No	1
FADS6	0.227217	0.235971	-0.00875401	0.0767941	0.0573561	0.019438	#N/A	#N/A	#N/A	0.0222511	0.0076677	0.0145834	0.184432	0.540435	-0.356003	0.292993	0.468436	-0.175443	0	Yes	No	1
FAIM3	0.593216	0.693393	-0.100177	0.329803	0.520227	-0.190423	0.580731	0.769254	-0.188522	0.415383	0.682849	-0.267466	0.317683	0.388626	-0.0709431	0.325	0.573926	-0.248925	0	No	No	2
FAM100B	0.102676	0.347751	-0.245074	0.0751176	0.0985246	-0.023407	0.00431489	0.0173239	-0.013009	0.036926	0.043825	-0.00689904	0.489238	0.487475	0.00176322	#N/A	#N/A	#N/A	0	No	No	1
FAM101A	0.669757	0.884346	-0.21459	0.505205	0.272789	0.232416	0.585414	0.602174	-0.0167594	0.390644	0.337489	0.0531555	0.903029	0.839942	0.0630865	0.819891	0.801414	0.0184777	1	No	No	1
FAM104B	0.305857	0.495251	-0.189395	0.29897	0.47695	-0.17798	0.196822	0.431879	-0.235058	0.211594	0.435375	-0.22378	0.230006	0.433505	-0.203499	0.543016	0.586173	-0.0431571	0	No	No	3
FAM107A	0.715661	0.659802	0.0558588	0.666615	0.57576	0.0908549	0.143619	0.125243	0.0183763	0.143619	0.125243	0.0183763	0.513196	0.730499	-0.217303	0.533557	0.499807	0.0337496	0	No	No	1
FAM107B	0.768602	0.745048	0.0235537	0.816695	0.880535	-0.0638399	0.694965	0.91754	-0.222575	0.610372	0.877033	-0.266661	0.599505	0.573533	0.0259719	0.891442	0.702918	0.188524	0	No	No	2
FAM117B	0.0315584	0.0390822	-0.00752385	0.0448074	0.0584958	-0.0136884	#N/A	#N/A	#N/A	0.10117	0.121028	-0.0198582	0.442602	0.467047	-0.0244452	0.42314	0.863562	-0.440421	0	No	No	1
FAM120C	0.335864	0.516638	-0.180773	0.04572	0.183847	-0.138127	0.500425	0.596917	-0.0964923	0.391385	0.507688	-0.116304	0.28637	0.50817	-0.2218	0.666644	0.691441	-0.0247967	0	No	No	1
FAM122B	0.181044	0.380825	-0.19978	0.139448	0.364922	-0.225473	0.266939	0.421563	-0.154624	0.174558	0.355685	-0.181127	0.492372	0.620583	-0.128212	#N/A	#N/A	#N/A	0	No	No	1
FAM123A	0.267771	0.427646	-0.159875	0.0470352	0.0632052	-0.01617	0.106338	0.080909	0.0254292	0.34821	0.377383	-0.0291736	0.614071	0.589865	0.0242062	0.488845	0.843625	-0.35478	0	No	No	1
FAM123B	0.349962	0.415234	-0.0652721	0.352512	0.492891	-0.140379	0.359349	0.448172	-0.0888229	0.405217	0.519721	-0.114503	0.660841	0.882002	-0.221161	0.745096	0.893097	-0.148001	0	No	No	1
FAM123C	0.17806	0.186169	-0.00810933	0.100447	0.0768738	0.0235734	0.148	0.241981	-0.0939816	0.141295	0.100324	0.0409705	0.288939	0.767326	-0.478387	0.324021	0.689273	-0.365252	0	No	No	2
FAM127C	0.388466	0.524691	-0.136225	0.110516	0.288556	-0.17804	0.312474	0.516539	-0.204065	0.27066	0.438566	-0.167906	#N/A	#N/A	#N/A	0.303719	0.421075	-0.117356	0	No	No	1
FAM129C	0.800357	0.817046	-0.0166891	0.0789064	0.182833	-0.103927	0.213852	0.501748	-0.287896	0.213852	0.501748	-0.287896	0.223597	0.367507	-0.14391	0.143825	0.251035	-0.10721	0	No	No	2
FAM12A	0.387434	0.913817	-0.526383	0.159024	0.60831	-0.449286	0.513549	0.918957	-0.405408	#N/A	#N/A	#N/A	0.252231	0.851815	-0.599584	0.197936	0.91228	-0.714344	0	No	No	5
FAM12B	#N/A	#N/A	#N/A	#N/A	#N/A	#N/A	0.266085	0.908147	-0.642062	#N/A	#N/A	#N/A	0.13421	0.833252	-0.699041	#N/A	#N/A	#N/A	0	No	No	2
FAM132A	0.19348	0.295158	-0.101678	0.00717859	0.00826835	-0.00108976	#N/A	#N/A	#N/A	0.061352	0.105888	-0.044536	0.487529	0.661268	-0.173739	0.612939	0.824563	-0.211624	0	No	No	1
FAM135B	0.171758	0.389912	-0.218155	0.139763	0.120597	0.0191656	0.192299	0.655015	-0.462716	#N/A	#N/A	#N/A	0.169839	0.580799	-0.41096	0.123535	0.877131	-0.753596	0	No	No	4
FAM136A	0.315624	0.631687	-0.316062	0.0483162	0.0470669	0.00124938	0.00761781	0.0136401	-0.00602227	0.00761781	0.0136401	-0.00602227	0.305525	0.319089	-0.0135641	0.861978	0.806748	0.0552297	0	No	No	1
FAM150A	0.214913	0.077978	0.136935	0.105432	0.0907051	0.0147264	0.188293	0.040991	0.147302	0.188293	0.040991	0.147302	0.136163	0.275904	-0.139741	0.143763	0.751307	-0.607544	0	No	No	1
FAM153A	#N/A	#N/A	#N/A	#N/A	#N/A	#N/A	0.389223	0.834628	-0.445405	#N/A	#N/A	#N/A	0.384553	0.908904	-0.524351	#N/A	#N/A	#N/A	0	No	No	2
FAM153B	0.395354	0.610132	-0.214778	#N/A	#N/A	#N/A	#N/A	#N/A	#N/A	#N/A	#N/A	#N/A	0.209667	0.655495	-0.445828	0.243434	0.818015	-0.574581	0	No	No	3
FAM153C	0.740953	0.408687	0.332267	#N/A	#N/A	#N/A	0.529162	0.821337	-0.292175	0.529162	0.821337	-0.292175	0.322569	0.740172	-0.417603	0.364344	0.8404	-0.476056	1	No	No	4
FAM155A	0.0532615	0.0429387	0.0103228	0.203899	0.199631	0.00426796	0.115325	0.0612962	0.0540288	0.0844774	0.0920478	-0.00757038	0.302903	0.741434	-0.438531	0.467688	0.862606	-0.394918	0	No	No	2
FAM155B	0.263685	0.452451	-0.188766	0.420789	0.567156	-0.146367	0.325701	0.508647	-0.182946	0.266599	0.452745	-0.186146	0.498796	0.725258	-0.226461	0.542888	0.853669	-0.31078	0	No	No	2
FAM157A	0.588453	0.820001	-0.231548	#N/A	#N/A	#N/A	#N/A	#N/A	#N/A	#N/A	#N/A	#N/A	0.381012	0.538983	-0.157971	0.193517	0.510232	-0.316715	0	No	No	2
FAM157B	0.623466	0.82477	-0.201304	#N/A	#N/A	#N/A	#N/A	#N/A	#N/A	#N/A	#N/A	#N/A	0.560412	0.718017	-0.157605	#N/A	#N/A	#N/A	0	No	No	1
FAM160A1	0.358482	0.252969	0.105513	0.0221357	0.0282365	-0.00610072	0.399591	0.661439	-0.261848	0.235481	0.476615	-0.241134	0.413624	0.79725	-0.383625	0.842707	0.918351	-0.0756444	0	No	No	3
FAM163B	0.380186	0.644735	-0.264549	0.14334	0.528575	-0.385235	#N/A	#N/A	#N/A	#N/A	#N/A	#N/A	0.529898	0.866694	-0.336797	#N/A	#N/A	#N/A	0	No	No	3
FAM166A	0.575557	0.785182	-0.209625	0.582589	0.615883	-0.0332939	#N/A	#N/A	#N/A	#N/A	#N/A	#N/A	0.672743	0.704463	-0.0317194	#N/A	#N/A	#N/A	0	No	No	1
FAM166B	#N/A	#N/A	#N/A	0.662716	0.365799	0.296916	0.347874	0.12655	0.221324	0.347874	0.12655	0.221324	0.754667	0.609797	0.14487	#N/A	#N/A	#N/A	3	No	No	0
FAM167A	0.0334901	0.0533735	-0.0198834	0.0433944	0.0473673	-0.00397295	0.392528	0.601596	-0.209069	0.0225628	0.0383461	-0.0157833	0.253169	0.514346	-0.261178	0.120458	0.627609	-0.507151	0	No	No	3
FAM167B	0.504098	0.790928	-0.286831	#N/A	#N/A	#N/A	#N/A	#N/A	#N/A	0.677468	0.733167	-0.0556995	0.466376	0.191823	0.274553	0.488507	0.144567	0.343941	2	No	No	1
FAM169B	0.735338	0.8743	-0.138962	0.60008	0.857999	-0.257919	0.488897	0.764287	-0.275391	0.186946	0.645368	-0.458422	#N/A	#N/A	#N/A	0.2933	0.793015	-0.499715	0	No	No	4
FAM170A	0.556057	0.899919	-0.343862	0.487507	0.844596	-0.35709	0.505463	0.885191	-0.379728	0.505463	0.885191	-0.379728	0.499059	0.902597	-0.403538	0.684369	0.906704	-0.222335	0	No	No	6
FAM171B	0.290739	0.321285	-0.0305459	0.0483205	0.0569634	-0.00864284	0.0125515	0.0236211	-0.0110695	0.0163378	0.0300617	-0.0137239	0.713828	0.74556	-0.0317322	0.88288	0.633134	0.249747	1	No	No	0
FAM180A	0.893471	0.895605	-0.00213422	0.19098	0.346568	-0.155588	0.12637	0.399079	-0.272708	0.12637	0.399079	-0.272708	0.418124	0.482451	-0.0643277	0.740166	0.690473	0.0496925	0	No	No	2
FAM181A	0.727355	0.880383	-0.153028	0.645702	0.867867	-0.222165	0.688372	0.871999	-0.183627	#N/A	#N/A	#N/A	0.733126	0.711199	0.0219271	0.657437	0.799172	-0.141735	0	No	No	1
FAM183B	0.798851	0.872896	-0.0740449	0.492679	0.708911	-0.216233	#N/A	#N/A	#N/A	#N/A	#N/A	#N/A	0.865816	0.910842	-0.0450265	#N/A	#N/A	#N/A	0	No	No	1
FAM186A	0.437787	0.811871	-0.374084	0.556377	0.79802	-0.241643	#N/A	#N/A	#N/A	0.949184	0.95897	-0.00978557	0.610365	0.646406	-0.0360412	#N/A	#N/A	#N/A	0	No	No	2
FAM187B	0.519202	0.821859	-0.302657	0.388163	0.748426	-0.360263	0.471568	0.891856	-0.420288	0.578742	0.867775	-0.289033	0.498028	0.629977	-0.131949	#N/A	#N/A	#N/A	0	No	No	4
FAM190A	0.165878	0.233903	-0.0680251	0.204216	0.405674	-0.201458	0.271539	0.404313	-0.132774	0.103306	0.102526	0.000779762	0.577634	0.821535	-0.243901	0.539161	0.75026	-0.2111	0	No	No	3
FAM193A	0.812889	0.839941	-0.0270524	0.613112	0.373193	0.23992	0.801973	0.720583	0.0813906	0.73663	0.621149	0.115481	0.712507	0.715839	-0.00333153	0.787919	0.766481	0.0214379	1	No	No	0
FAM193B	0.200242	0.424247	-0.224006	0.0295242	0.0382675	-0.0087433	0.519081	0.489901	0.0291798	0.0557039	0.102815	-0.0471109	0.702391	0.63772	0.0646707	0.810325	0.651228	0.159097	0	No	No	1
FAM194B	0.416088	0.469105	-0.0530175	0.0824989	0.0859156	-0.00341676	0.292867	0.577057	-0.28419	0.0227806	0.021233	0.00154763	0.819553	0.902327	-0.082774	0.719357	0.909158	-0.1898	0	No	No	1
FAM198A	0.609679	0.830596	-0.220917	0.196165	0.203218	-0.00705293	0.0470582	0.0373154	0.00974272	0.0470582	0.0373154	0.00974272	0.457903	0.47337	-0.0154668	0.609282	0.920595	-0.311314	0	No	No	2
FAM198B	0.322426	0.159831	0.162595	0.193582	0.0855958	0.107986	0.0862782	0.0811202	0.00515805	0.219243	0.0865893	0.132654	0.440384	0.699977	-0.259593	#N/A	#N/A	#N/A	0	No	No	1
FAM19A1	#N/A	#N/A	#N/A	0.430723	0.407751	0.0229713	0.553244	0.546944	0.00629972	0.674425	0.334683	0.339743	0.323895	0.475964	-0.15207	#N/A	#N/A	#N/A	1	No	No	0
FAM19A2	0.199792	0.416973	-0.217181	0.0385585	0.0365146	0.0020439	0.275315	0.452774	-0.177459	0.065557	0.0807555	-0.0151984	0.235036	0.471152	-0.236116	0.464027	0.905907	-0.44188	0	Yes	No	3
FAM19A5	0.234592	0.277435	-0.0428433	0.0252383	0.00578079	0.0194576	#N/A	#N/A	#N/A	0.119692	0.0729931	0.0466987	0.454562	0.692497	-0.237935	0.583109	0.907595	-0.324485	0	No	No	2
FAM22D	0.823078	0.841876	-0.0187982	#N/A	#N/A	#N/A	#N/A	#N/A	#N/A	0.724703	0.887492	-0.162789	0.905864	0.904405	0.00145877	0.686432	0.926544	-0.240112	0	No	No	1
FAM22F	#N/A	#N/A	#N/A	#N/A	#N/A	#N/A	#N/A	#N/A	#N/A	#N/A	#N/A	#N/A	0.445796	0.680146	-0.23435	#N/A	#N/A	#N/A	0	No	No	1
FAM23A	#N/A	#N/A	#N/A	#N/A	#N/A	#N/A	#N/A	#N/A	#N/A	#N/A	#N/A	#N/A	0.545565	0.874171	-0.328606	#N/A	#N/A	#N/A	0	No	No	1
FAM24A	0.341591	0.848622	-0.507031	0.163193	0.786988	-0.623795	0.0758927	0.213124	-0.137231	#N/A	#N/A	#N/A	0.392511	0.359783	0.0327284	#N/A	#N/A	#N/A	0	No	No	2
FAM26D	0.743865	0.831841	-0.0879761	0.339497	0.282976	0.0565211	0.445756	0.609918	-0.164161	0.592733	0.846633	-0.253899	0.177262	0.1747	0.00256237	0.84012	0.859302	-0.019182	0	No	No	1
FAM26E	#N/A	#N/A	#N/A	0.316898	0.330332	-0.0134337	#N/A	#N/A	#N/A	0.300955	0.39758	-0.0966248	0.137394	0.392243	-0.254849	0.650846	0.893868	-0.243022	0	No	No	2
FAM27L	0.395799	0.618494	-0.222695	0.449375	0.707985	-0.25861	#N/A	#N/A	#N/A	#N/A	#N/A	#N/A	0.525299	0.816183	-0.290884	#N/A	#N/A	#N/A	0	No	No	3
FAM32A	0.0791741	0.137192	-0.0580179	0.0430039	0.0557433	-0.0127394	#N/A	#N/A	#N/A	0.0493951	0.0544975	-0.00510245	0.268997	0.273595	-0.00459779	0.54306	0.793843	-0.250783	0	No	No	1
FAM3B	0.479731	0.719403	-0.239672	0.105486	0.0596829	0.045803	0.184672	0.00601093	0.178661	0.184672	0.00601093	0.178661	0.235775	0.384328	-0.148552	#N/A	#N/A	#N/A	0	No	No	1
FAM3C	0.0709224	0.202944	-0.132021	0.0132938	0.0210763	-0.00778247	0.422413	0.395877	0.0265363	#N/A	#N/A	#N/A	0.14478	0.437609	-0.292829	#N/A	#N/A	#N/A	0	No	No	1
FAM43A	0.382644	0.412281	-0.0296373	0.024347	0.0410775	-0.0167305	0.0518606	0.064452	-0.0125913	0.308933	0.131861	0.177072	#N/A	#N/A	#N/A	0.549172	0.2367	0.312472	1	Yes	No	0
FAM45B	0.408071	0.67694	-0.268869	0.109071	0.197434	-0.0883636	#N/A	#N/A	#N/A	#N/A	#N/A	#N/A	0.220318	0.208848	0.0114697	#N/A	#N/A	#N/A	0	No	No	1
FAM46D	0.420122	0.66921	-0.249088	0.164422	0.359867	-0.195445	0.229029	0.584511	-0.355482	0.29102	0.67035	-0.37933	#N/A	#N/A	#N/A	#N/A	#N/A	#N/A	0	No	No	3
FAM47A	#N/A	#N/A	#N/A	0.584426	0.69563	-0.111204	0.56808	0.790611	-0.22253	0.651492	0.918017	-0.266526	#N/A	#N/A	#N/A	#N/A	#N/A	#N/A	0	No	No	2
FAM47B	#N/A	#N/A	#N/A	0.655767	0.697027	-0.0412607	#N/A	#N/A	#N/A	0.554976	0.798189	-0.243213	#N/A	#N/A	#N/A	0.155719	0.570645	-0.414927	0	No	No	2
FAM53A	0.351423	0.470868	-0.119445	#N/A	#N/A	#N/A	0.680831	0.714155	-0.0333231	#N/A	#N/A	#N/A	0.759139	0.812836	-0.053697	0.509627	0.744255	-0.234627	0	No	No	1
FAM55A	0.753578	0.931076	-0.177498	#N/A	#N/A	#N/A	0.709496	0.801108	-0.0916122	#N/A	#N/A	#N/A	0.695441	0.921131	-0.22569	#N/A	#N/A	#N/A	0	No	No	1
FAM55B	0.280759	0.613973	-0.333214	0.205701	0.474539	-0.268838	0.11102	0.348162	-0.237141	0.11102	0.348162	-0.237141	#N/A	#N/A	#N/A	#N/A	#N/A	#N/A	0	No	No	4
FAM55D	0.63349	0.872201	-0.238711	0.629399	0.798765	-0.169367	0.613715	0.645661	-0.0319461	#N/A	#N/A	#N/A	0.682794	0.783217	-0.100422	#N/A	#N/A	#N/A	0	No	No	1
FAM58B	0.803777	0.875102	-0.0713255	0.31496	0.81418	-0.49922	#N/A	#N/A	#N/A	0.817678	0.906849	-0.089171	#N/A	#N/A	#N/A	0.836485	0.887002	-0.0505174	0	No	No	1
FAM66A	#N/A	#N/A	#N/A	#N/A	#N/A	#N/A	#N/A	#N/A	#N/A	#N/A	#N/A	#N/A	0.457477	0.75958	-0.302104	#N/A	#N/A	#N/A	0	No	No	1
FAM66B	0.696621	0.838341	-0.14172	0.0964408	0.106066	-0.00962526	#N/A	#N/A	#N/A	#N/A	#N/A	#N/A	0.464302	0.693481	-0.229179	#N/A	#N/A	#N/A	0	No	No	1
FAM66D	0.489582	0.567047	-0.077465	0.0631034	0.071799	-0.00869562	#N/A	#N/A	#N/A	#N/A	#N/A	#N/A	0.581892	0.814273	-0.232382	#N/A	#N/A	#N/A	0	No	No	1
FAM66E	#N/A	#N/A	#N/A	#N/A	#N/A	#N/A	#N/A	#N/A	#N/A	#N/A	#N/A	#N/A	0.31857	0.57734	-0.25877	#N/A	#N/A	#N/A	0	No	No	1
FAM69C	0.358905	0.301328	0.0575768	0.0556102	0.0240736	0.0315366	#N/A	#N/A	#N/A	#N/A	#N/A	#N/A	0.379511	0.402854	-0.0233434	0.521621	0.883453	-0.361832	0	No	No	1
FAM71A	0.843757	0.908575	-0.064818	0.624574	0.86135	-0.236776	0.65418	0.8361	-0.181919	0.667276	0.854772	-0.187496	#N/A	#N/A	#N/A	0.529347	0.780809	-0.251462	0	No	No	2
FAM71B	0.289517	0.771245	-0.481728	0.646331	0.858197	-0.211866	0.660998	0.854535	-0.193537	0.674387	0.873692	-0.199305	#N/A	#N/A	#N/A	0.323124	0.695873	-0.372748	0	No	No	3
FAM71C	0.629133	0.832772	-0.203639	#N/A	#N/A	#N/A	0.603978	0.859087	-0.255109	0.606947	0.858402	-0.251454	#N/A	#N/A	#N/A	0.452377	0.695996	-0.243618	0	No	No	4
FAM71D	0.835032	0.84636	-0.0113286	0.39792	0.469792	-0.0718722	0.370273	0.671171	-0.300898	0.370273	0.671171	-0.300898	0.859592	0.888956	-0.0293643	0.905421	0.931754	-0.0263329	0	No	No	2
FAM71E2	0.590821	0.843436	-0.252615	0.491288	0.443775	0.047513	0.655833	0.665273	-0.0094399	0.609959	0.687026	-0.0770669	0.534175	0.632138	-0.0979632	0.0447523	0.0471243	-0.00237197	0	No	No	1
FAM71F1	0.716155	0.712566	0.00358883	0.513919	0.561691	-0.0477716	#N/A	#N/A	#N/A	0.808936	0.680214	0.128721	0.651509	0.913602	-0.262093	0.87585	0.889747	-0.0138978	0	No	No	1
FAM74A3	0.450023	0.784375	-0.334352	#N/A	#N/A	#N/A	#N/A	#N/A	#N/A	#N/A	#N/A	#N/A	#N/A	#N/A	#N/A	#N/A	#N/A	#N/A	0	No	No	1
FAM75A1	#N/A	#N/A	#N/A	#N/A	#N/A	#N/A	#N/A	#N/A	#N/A	#N/A	#N/A	#N/A	0.383206	0.747112	-0.363906	#N/A	#N/A	#N/A	0	No	No	1
FAM75A2	#N/A	#N/A	#N/A	#N/A	#N/A	#N/A	#N/A	#N/A	#N/A	#N/A	#N/A	#N/A	0.383206	0.747112	-0.363906	#N/A	#N/A	#N/A	0	No	No	1
FAM75A3	0.494521	0.80709	-0.312569	#N/A	#N/A	#N/A	#N/A	#N/A	#N/A	#N/A	#N/A	#N/A	#N/A	#N/A	#N/A	#N/A	#N/A	#N/A	0	No	No	1
FAM75A5	0.665143	0.915332	-0.250189	#N/A	#N/A	#N/A	#N/A	#N/A	#N/A	#N/A	#N/A	#N/A	#N/A	#N/A	#N/A	#N/A	#N/A	#N/A	0	No	No	1
FAM75A6	0.320553	0.65886	-0.338307	#N/A	#N/A	#N/A	#N/A	#N/A	#N/A	#N/A	#N/A	#N/A	#N/A	#N/A	#N/A	#N/A	#N/A	#N/A	0	No	No	1
FAM75A7	0.665143	0.915332	-0.250189	#N/A	#N/A	#N/A	#N/A	#N/A	#N/A	#N/A	#N/A	#N/A	#N/A	#N/A	#N/A	#N/A	#N/A	#N/A	0	No	No	1
FAM75C1	0.492251	0.589783	-0.0975322	#N/A	#N/A	#N/A	#N/A	#N/A	#N/A	#N/A	#N/A	#N/A	0.490642	0.80633	-0.315689	#N/A	#N/A	#N/A	0	No	No	1
FAM78B	0.155915	0.175268	-0.0193528	0.0253098	0.0375017	-0.0121919	0.0430586	0.11889	-0.0758317	#N/A	#N/A	#N/A	0.335768	0.477897	-0.142129	0.50037	0.798442	-0.298072	0	No	No	1
FAM81B	0.576741	0.827286	-0.250545	#N/A	#N/A	#N/A	#N/A	#N/A	#N/A	#N/A	#N/A	#N/A	0.738024	0.641005	0.097019	#N/A	#N/A	#N/A	0	No	No	1
FAM83B	0.356131	0.387171	-0.0310397	0.0705928	0.0774655	-0.00687268	0.25986	0.473835	-0.213975	#N/A	#N/A	#N/A	0.496382	0.911907	-0.415525	#N/A	#N/A	#N/A	0	No	No	2
FAM83C	0.383834	0.628037	-0.244204	0.735538	0.62051	0.115028	0.887776	0.812049	0.0757267	0.927258	0.844329	0.0829288	0.52297	0.577353	-0.0543826	0.86565	0.87527	-0.00961993	0	No	No	1
FAM83F	0.233296	0.232818	0.000477787	0.129671	0.103744	0.0259265	0.11615	0.0234374	0.0927127	0.567951	0.379039	0.188912	0.512929	0.718437	-0.205508	0.977988	0.986434	-0.00844687	0	No	No	1
FAM83H	0.257584	0.182067	0.0755173	0.0555446	0.0508174	0.00472723	0.439372	0.482719	-0.0433471	0.133262	0.0321595	0.101102	0.707692	0.792984	-0.0852913	0.340749	0.740999	-0.40025	0	No	No	1
FAM90A1	0.621502	0.658031	-0.0365287	0.413327	0.521624	-0.108296	0.566545	0.748548	-0.182003	0.491784	0.552433	-0.060649	0.719536	0.889771	-0.170234	0.668394	0.882508	-0.214114	0	No	No	1
FAM90A10	0.478357	0.806164	-0.327808	#N/A	#N/A	#N/A	#N/A	#N/A	#N/A	#N/A	#N/A	#N/A	0.427182	0.873297	-0.446115	#N/A	#N/A	#N/A	0	No	No	2
FAM90A13	0.557049	0.850448	-0.293399	#N/A	#N/A	#N/A	#N/A	#N/A	#N/A	#N/A	#N/A	#N/A	0.535773	0.981272	-0.445499	#N/A	#N/A	#N/A	0	No	No	2
FAM90A14	0.557049	0.850448	-0.293399	#N/A	#N/A	#N/A	#N/A	#N/A	#N/A	#N/A	#N/A	#N/A	0.535773	0.981272	-0.445499	#N/A	#N/A	#N/A	0	No	No	2
FAM90A20	0.746024	0.968851	-0.222827	#N/A	#N/A	#N/A	#N/A	#N/A	#N/A	#N/A	#N/A	#N/A	0.492113	0.784755	-0.292642	#N/A	#N/A	#N/A	0	No	No	2
FAM90A5	0.178341	0.444688	-0.266347	#N/A	#N/A	#N/A	#N/A	#N/A	#N/A	#N/A	#N/A	#N/A	#N/A	#N/A	#N/A	#N/A	#N/A	#N/A	0	No	No	1
FAM90A7	0.459279	0.845231	-0.385952	#N/A	#N/A	#N/A	#N/A	#N/A	#N/A	#N/A	#N/A	#N/A	0.470137	0.770579	-0.300443	#N/A	#N/A	#N/A	0	No	No	2
FAM90A8	#N/A	#N/A	#N/A	#N/A	#N/A	#N/A	#N/A	#N/A	#N/A	#N/A	#N/A	#N/A	0.522784	0.857223	-0.33444	#N/A	#N/A	#N/A	0	No	No	1
FAM90A9	#N/A	#N/A	#N/A	#N/A	#N/A	#N/A	#N/A	#N/A	#N/A	#N/A	#N/A	#N/A	0.448176	0.781713	-0.333537	#N/A	#N/A	#N/A	0	No	No	1
FAM91A1	0.06621	0.0733489	-0.00713885	0.0370173	0.0506683	-0.0136511	0.375181	0.342881	0.0323008	0.375181	0.342881	0.0323008	0.509485	0.485651	0.0238345	0.649383	0.93032	-0.280937	0	No	No	1
FAM92A3	0.434411	0.871049	-0.436637	#N/A	#N/A	#N/A	#N/A	#N/A	#N/A	#N/A	#N/A	#N/A	0.218101	0.803887	-0.585786	#N/A	#N/A	#N/A	0	No	No	2
FAM98B	0.317264	0.5231	-0.205836	0.0392626	0.0413967	-0.00213407	0.0101806	0.0120503	-0.00186978	0.0101806	0.0120503	-0.00186978	0.404038	0.461117	-0.0570797	#N/A	#N/A	#N/A	0	No	No	1
FAM99A	0.669535	0.845836	-0.176301	0.633446	0.853249	-0.219803	#N/A	#N/A	#N/A	#N/A	#N/A	#N/A	#N/A	#N/A	#N/A	#N/A	#N/A	#N/A	0	No	No	1
FAM99B	0.663819	0.904366	-0.240547	0.461127	0.639806	-0.178678	#N/A	#N/A	#N/A	#N/A	#N/A	#N/A	0.649278	0.857042	-0.207765	#N/A	#N/A	#N/A	0	No	No	2
FAM9A	0.707528	0.86031	-0.152781	0.804388	0.887992	-0.083604	0.752017	0.888914	-0.136896	0.758559	0.893365	-0.134807	0.570723	0.807909	-0.237186	#N/A	#N/A	#N/A	0	No	No	1
FANCB	0.36709	0.457771	-0.0906809	0.26187	0.41695	-0.15508	0.50918	0.658009	-0.148829	0.293803	0.505256	-0.211453	0.856251	0.88157	-0.0253198	#N/A	#N/A	#N/A	0	No	No	1
FANCG	0.396541	0.717354	-0.320812	0.0461145	0.0421195	0.00399497	0.0603285	0.0601113	0.000217157	0.0603285	0.0601113	0.000217157	0.612292	0.618413	-0.00612065	#N/A	#N/A	#N/A	0	No	No	1
FANK1	0.252025	0.540152	-0.288127	0.257847	0.370233	-0.112386	0.419264	0.472026	-0.0527616	0.419264	0.472026	-0.0527616	0.55914	0.707154	-0.148014	0.804692	0.9496	-0.144908	0	No	No	1
FAR2	0.723001	0.944045	-0.221044	0.532387	0.884659	-0.352272	0.656974	0.847899	-0.190925	0.530509	0.897487	-0.366978	0.587754	0.344251	0.243503	0.71805	0.790233	-0.0721833	1	No	No	3
FARSA	0.215214	0.616806	-0.401592	0.0442515	0.0468603	-0.00260877	#N/A	#N/A	#N/A	0.0580402	0.0735016	-0.0154614	0.513966	0.505518	0.00844763	0.695967	0.857426	-0.16146	0	No	No	1
FASLG	0.69568	0.913423	-0.217743	0.786416	0.753587	0.0328287	0.650395	0.782879	-0.132484	0.811358	0.877706	-0.0663481	#N/A	#N/A	#N/A	0.798039	0.883301	-0.0852617	0	No	No	1
FASTKD5	0.320582	0.532165	-0.211583	0.088228	0.0926542	-0.00442618	0.157047	0.163141	-0.00609411	0.00493512	0.00964979	-0.00471467	0.820355	0.887363	-0.067008	0.844948	0.943592	-0.0986443	0	No	No	1
FAT2	0.493989	0.731157	-0.237168	0.753072	0.921925	-0.168853	#N/A	#N/A	#N/A	0.699572	0.942151	-0.242579	0.728326	0.87705	-0.148724	0.818242	0.684923	0.13332	0	No	No	2
FATE1	0.432048	0.681272	-0.249225	0.391569	0.552713	-0.161144	#N/A	#N/A	#N/A	0.364828	0.562343	-0.197515	0.316157	0.596403	-0.280246	0.248098	0.378778	-0.13068	0	No	No	2
FBL	0.45833	0.45488	0.00345008	0.043539	0.0533006	-0.00976155	#N/A	#N/A	#N/A	#N/A	#N/A	#N/A	0.418216	0.400839	0.0173779	0.84194	0.561	0.28094	1	No	No	0
FBLN2	0.472349	0.553199	-0.0808502	0.135132	0.207497	-0.072365	0.513406	0.57616	-0.0627543	0.497762	0.748695	-0.250933	0.701349	0.772335	-0.0709862	0.679678	0.828922	-0.149244	0	No	No	1
FBN3	0.117571	0.162935	-0.0453635	0.325723	0.424095	-0.0983719	0.235419	0.343828	-0.108409	0.204972	0.263062	-0.0580902	0.667404	0.795727	-0.128323	0.462554	0.763772	-0.301218	0	No	No	1
FBP2	#N/A	#N/A	#N/A	0.480612	0.663885	-0.183273	#N/A	#N/A	#N/A	0.65953	0.8199	-0.16037	0.580071	0.874217	-0.294145	#N/A	#N/A	#N/A	0	No	No	1
FBXO27	0.125512	0.357684	-0.232173	0.12578	0.214405	-0.088625	0.027961	0.0539988	-0.0260379	0.032162	0.0752446	-0.0430825	0.239007	0.236257	0.00275056	0.932824	0.932123	0.000700867	0	No	No	1
FBXO34	0.177461	0.188839	-0.0113775	0.0306261	0.0407908	-0.0101647	0.454585	0.478855	-0.0242696	0.0718722	0.102101	-0.0302288	#N/A	#N/A	#N/A	0.63629	0.880051	-0.243761	0	No	No	1
FBXO39	0.273915	0.273897	1.82564e-05	0.0914846	0.0720464	0.0194382	0.0965908	0.0605483	0.0360425	0.127367	0.0704764	0.0568902	0.134774	0.449965	-0.31519	0.696592	0.88159	-0.184999	0	Yes	No	1
FBXO4	0.118341	0.345107	-0.226766	0.0220896	0.0264609	-0.00437129	0.00618222	0.00990963	-0.00372741	0.0299267	0.0374276	-0.00750091	0.220015	0.229116	-0.00910108	#N/A	#N/A	#N/A	0	No	No	1
FBXO40	0.64469	0.920168	-0.275478	0.311888	0.247419	0.0644697	0.227829	0.232521	-0.00469207	0.227829	0.232521	-0.00469207	#N/A	#N/A	#N/A	0.605553	0.882061	-0.276508	0	No	No	2
FBXO41	0.201443	0.587935	-0.386492	0.505746	0.599029	-0.0932834	#N/A	#N/A	#N/A	#N/A	#N/A	#N/A	0.595315	0.514475	0.0808397	0.553266	0.608155	-0.0548891	0	No	No	1
FBXO46	0.151562	0.246889	-0.0953273	0.0505334	0.0584159	-0.00788248	0.230777	0.227999	0.00277747	#N/A	#N/A	#N/A	0.877216	0.813329	0.0638869	0.772481	0.427397	0.345084	1	No	No	0
FBXO8	0.566405	0.616993	-0.0505885	0.0778909	0.0688839	0.00900694	0.0404093	0.0449461	-0.00453679	0.038708	0.0429643	-0.00425629	0.380508	0.927567	-0.547059	#N/A	#N/A	#N/A	0	No	No	1
FBXW10	0.45459	0.732783	-0.278193	#N/A	#N/A	#N/A	0.321633	0.352108	-0.0304747	0.321633	0.352108	-0.0304747	0.856094	0.893415	-0.0373212	#N/A	#N/A	#N/A	0	No	No	1
FBXW12	0.662264	0.73092	-0.0686561	0.649044	0.838519	-0.189475	0.731004	0.895206	-0.164202	0.731004	0.895206	-0.164202	0.585713	0.874323	-0.28861	#N/A	#N/A	#N/A	0	No	No	1
FBXW7	0.249944	0.218528	0.0314154	0.0650189	0.0751008	-0.0100819	0.563574	0.534323	0.0292512	0.3598	0.238025	0.121776	0.611014	0.498598	0.112416	0.863409	0.467269	0.39614	1	No	No	0
FCAMR	0.709898	0.905691	-0.195793	#N/A	#N/A	#N/A	0.365454	0.703284	-0.33783	0.365454	0.703284	-0.33783	0.504598	0.692174	-0.187576	#N/A	#N/A	#N/A	0	No	No	2
FCAR	0.175905	0.546171	-0.370266	0.101104	0.459626	-0.358523	0.15923	0.817409	-0.658179	0.15923	0.817409	-0.658179	0.254235	0.388844	-0.134609	0.352483	0.781918	-0.429435	0	No	No	5
FCER1A	0.308961	0.89054	-0.581579	#N/A	#N/A	#N/A	0.321671	0.829473	-0.507802	#N/A	#N/A	#N/A	0.155596	0.362372	-0.206776	#N/A	#N/A	#N/A	0	No	No	3
[truncated: 5,114 more rows]
