# Supplementary material for: Genomic, Epigenomic, and Transcriptomic Profiling towards Identifying Omics Features and Specific Biomarkers That Distinguish Uterine Leiomyosarcoma and Leiomyoma at Molecular Levels
Source: Sarcoma. 2015 Dec 28;2015:412068. doi: 10.1155/2015/412068 (PMC4707342; doi:10.1155/2015/412068)
Supplement: Supplementary file 7 [file 412068.f7.xlsx]

## Sheet: TableS6A_TSS1500_hyper
Table S6A: full results of GREAT annotation for the hypermethylated regions in the TSS1500 category in LMS compared to NM
Ontology	# Term Name	Binom Rank	Binom Raw P-Value	Binom FDR Q-Val	Binom Fold Enrichment	Binom Observed Region Hits	Binom Region Set Coverage	Hyper Rank	Hyper FDR Q-Val	Hyper Fold Enrichment	Hyper Observed Gene Hits	Hyper Total Genes	Hyper Gene Set Coverage
GO Molecular Function	sequence-specific DNA binding	1	1.52013e-19	5.60625e-16	2.3234	137	12.67%	1	2.23639e-30	3.2324	130	697	12.49%
	nucleic acid binding transcription factor activity	2	6.37989e-19	1.17645e-15	2.0599	169	15.63%	2	6.67320e-28	2.6624	159	1035	15.27%
	sequence-specific DNA binding transcription factor activity	3	9.65894e-19	1.18741e-15	2.0566	168	15.54%	3	1.32048e-27	2.6482	158	1034	15.18%
	transcription regulatory region sequence-specific DNA binding	9	1.10250e-7	4.51780e-5	2.5828	40	3.70%	4	7.98547e-12	4.1263	40	168	3.84%
GO Biological Process	embryonic morphogenesis	4	1.15332e-11	3.01017e-8	2.0975	98	9.07%	11	3.40809e-20	3.1386	92	508	8.84%
	regionalization	12	2.81137e-10	2.44590e-7	2.3899	65	6.01%	22	2.81666e-14	3.4083	59	300	5.67%
	pattern specification process	21	2.15012e-9	1.06892e-6	2.0499	81	7.49%	19	1.03405e-15	3.0655	75	424	7.20%
	embryonic skeletal system morphogenesis	25	6.50397e-9	2.71606e-6	3.6256	29	2.68%	78	1.29374e-8	4.7265	24	88	2.31%
	embryonic organ morphogenesis	26	9.80720e-9	3.93797e-6	2.2808	59	5.46%	26	2.24648e-12	3.3879	52	266	5.00%
	anterior/posterior pattern specification	27	1.21620e-8	4.70266e-6	2.6529	44	4.07%	60	1.19830e-9	3.4661	39	195	3.75%
	embryonic skeletal system development	28	1.46774e-8	5.47257e-6	2.9873	36	3.33%	50	5.30745e-10	4.4437	30	117	2.88%
	skeletal system morphogenesis	31	4.06398e-8	1.36864e-5	2.5744	43	3.98%	68	2.32279e-9	3.4479	38	191	3.65%
	cell differentiation in spinal cord	74	1.85011e-6	2.61015e-4	3.5551	20	1.85%	93	1.38469e-7	5.8924	17	50	1.63%
	cell fate commitment	79	3.03393e-6	4.00940e-4	2.0236	51	4.72%	29	1.14806e-11	3.5589	46	224	4.42%
	hematopoietic stem cell differentiation	80	3.32845e-6	4.34362e-4	15.4905	6	0.56%	249	5.24456e-3	8.6652	5	10	0.48%
	dorsal/ventral pattern formation	84	4.30788e-6	5.35407e-4	2.8758	25	2.31%	115	2.69326e-6	4.0438	21	90	2.02%
	neuron fate commitment	94	8.28153e-6	9.19778e-4	3.0019	22	2.04%	104	7.17931e-7	5.0314	18	62	1.73%
	embryonic limb morphogenesis	97	1.34522e-5	1.44785e-3	2.4694	29	2.68%	71	2.69487e-9	4.2592	29	118	2.79%
	ossification	103	2.69449e-5	2.73111e-3	2.1980	34	3.15%	116	2.70462e-6	2.9031	33	197	3.17%
	cell fate specification	106	3.42465e-5	3.37296e-3	2.7288	22	2.04%	125	8.58658e-6	4.5326	17	65	1.63%
	limb development	113	6.43996e-5	5.94984e-3	2.0500	36	3.33%	37	7.89408e-11	4.0778	36	153	3.46%
	dorsal spinal cord development	114	8.84718e-5	8.10216e-3	5.1322	9	0.83%	151	1.18945e-4	7.0897	9	22	0.86%
	spinal cord development	115	9.94270e-5	9.02625e-3	2.4715	23	2.13%	117	3.91564e-6	4.1263	20	84	1.92%
	limb morphogenesis	116	1.06319e-4	9.56871e-3	2.0707	33	3.05%	51	5.33099e-10	4.0850	33	140	3.17%
Mouse Phenotype	thoracic vertebral transformation	1	4.76849e-11	3.77569e-7	7.8671	18	1.67%	110	1.10727e-4	4.4931	14	54	1.34%
	sacral vertebral transformation	2	2.45144e-10	9.70523e-7	19.1829	10	0.93%	161	3.97345e-4	6.9322	8	20	0.77%
	vertebral transformation	3	1.31675e-9	3.47534e-6	4.2995	26	2.41%	60	3.12344e-6	3.7962	23	105	2.21%
	abnormal rib development	4	1.35223e-8	2.67673e-5	7.4194	14	1.30%	159	3.92066e-4	5.4158	10	32	0.96%
	cervical vertebral transformation	6	2.96426e-8	3.91184e-5	6.3774	15	1.39%	104	7.18853e-5	5.0066	13	45	1.25%
	lumbar vertebral transformation	9	1.49067e-7	1.31146e-4	5.6158	15	1.39%	246	2.26320e-3	3.9716	11	48	1.06%
	abnormal rib attachment	11	1.76846e-7	1.27297e-4	3.4481	25	2.31%	42	5.75675e-7	4.1958	23	95	2.21%
	increased rib number	12	1.41557e-6	9.34039e-4	4.3950	16	1.48%	151	3.27252e-4	4.6215	12	45	1.15%
	abnormal femur morphology	13	2.65059e-6	1.61441e-3	2.5041	33	3.05%	57	1.98327e-6	3.2635	29	154	2.79%
	abnormal hindlimb stylopod morphology	14	2.78587e-6	1.57561e-3	2.4580	34	3.15%	48	1.08901e-6	3.2906	30	158	2.88%
	abnormal thoracic vertebrae morphology	17	8.60573e-6	4.00824e-3	2.8301	24	2.22%	86	2.41083e-5	3.4661	22	110	2.11%
	decreased primordial germ cell number	18	1.00993e-5	4.44257e-3	4.5158	13	1.20%	159	3.92066e-4	5.4158	10	32	0.96%
	abnormal ectoderm development	19	1.17548e-5	4.89864e-3	2.8505	23	2.13%	55	1.89237e-6	4.0561	22	94	2.11%
	abnormal presacral vertebrae morphology	21	2.04540e-5	7.71214e-3	2.1442	37	3.42%	62	3.93521e-6	2.8465	34	207	3.27%
	abnormal sacral vertebrae morphology	22	2.05445e-5	7.39415e-3	3.7227	15	1.39%	226	1.50885e-3	3.6338	13	62	1.25%
	abnormal primordial germ cell morphology	23	2.09038e-5	7.19635e-3	4.2079	13	1.20%	189	8.01058e-4	4.9516	10	35	0.96%
	abnormal rib morphology	27	2.83204e-5	8.30521e-3	2.0417	40	3.70%	64	4.61148e-6	2.6448	38	249	3.65%
	elongated metacarpal bones	31	3.67514e-5	9.38701e-3	22.3695	4	0.37%	639	4.12194e-2	17.3304	2	2	0.19%
	abnormal branchial pouch morphology	33	4.13479e-5	9.92099e-3	5.6774	9	0.83%	125	1.97219e-4	7.7024	8	18	0.77%
	distended abdomen	37	4.69233e-5	1.00416e-2	2.8296	20	1.85%	71	9.17840e-6	3.9840	20	87	1.92%
Disease Ontology	sensorineural hearing loss	1	4.63263e-6	1.03539e-2	5.2922	12	1.11%	29	7.85130e-4	4.4248	12	47	1.15%
	nevus	5	9.77190e-5	4.36804e-2	8.4256	6	0.56%	62	6.36282e-3	6.4989	6	16	0.58%
	inner ear disease	6	1.23274e-4	4.59195e-2	3.5205	13	1.20%	49	3.30584e-3	3.4661	13	65	1.25%
	cervical squamous cell carcinoma	7	1.43903e-4	4.59462e-2	6.3846	7	0.65%	67	1.01167e-2	5.0547	7	24	0.67%
MGI Expression: Detected	TS19_T2 vertebral cartilage condensation	1	1.75943e-16	1.64278e-12	196.5031	8	0.74%	528	4.64982e-5	11.5536	6	9	0.58%
	TS19_T3 vertebral cartilage condensation	1	1.75943e-16	1.64278e-12	196.5031	8	0.74%	528	4.64982e-5	11.5536	6	9	0.58%
	TS19_T4 vertebral cartilage condensation	3	4.68943e-16	1.45951e-12	173.7383	8	0.74%	586	9.96040e-5	10.3983	6	10	0.58%
	TS19_T5 vertebral cartilage condensation	3	4.68943e-16	1.45951e-12	173.7383	8	0.74%	586	9.96040e-5	10.3983	6	10	0.58%
	TS19_T6 vertebral cartilage condensation	3	4.68943e-16	1.45951e-12	173.7383	8	0.74%	586	9.96040e-5	10.3983	6	10	0.58%
	TS19_T7 vertebral cartilage condensation	3	4.68943e-16	1.45951e-12	173.7383	8	0.74%	586	9.96040e-5	10.3983	6	10	0.58%
	TS19_T8 vertebral cartilage condensation	3	4.68943e-16	1.45951e-12	173.7383	8	0.74%	586	9.96040e-5	10.3983	6	10	0.58%
	TS19_T9 vertebral cartilage condensation	3	4.68943e-16	1.45951e-12	173.7383	8	0.74%	586	9.96040e-5	10.3983	6	10	0.58%
	TS19_T10 vertebral cartilage condensation	3	4.68943e-16	1.45951e-12	173.7383	8	0.74%	586	9.96040e-5	10.3983	6	10	0.58%
	TS19_T11 vertebral cartilage condensation	3	4.68943e-16	1.45951e-12	173.7383	8	0.74%	586	9.96040e-5	10.3983	6	10	0.58%
	TS19_cervical vertebral cartilage condensation	11	4.52837e-15	3.84376e-12	130.6368	8	0.74%	586	9.96040e-5	10.3983	6	10	0.58%
	TS19_C7 vertebral cartilage condensation	12	7.82530e-15	6.08874e-12	213.0168	7	0.65%	637	1.76899e-4	12.3789	5	7	0.48%
	TS19_T1 vertebral cartilage condensation	13	1.91285e-14	1.37387e-11	187.3774	7	0.65%	692	4.13510e-4	10.8315	5	8	0.48%
	TS19_C6 vertebral cartilage condensation	14	6.50097e-13	4.33568e-10	213.9754	6	0.56%	854	1.64582e-3	11.5536	4	6	0.38%
	TS25_metanephros	17	6.64435e-12	3.64931e-9	3.1002	50	4.63%	83	2.81185e-13	3.7962	46	210	4.42%
	TS25_ureteric tip	18	4.94274e-11	2.56391e-8	15.3707	12	1.11%	293	1.26581e-7	11.9980	9	13	0.86%
	TS25_collecting duct	25	6.70510e-10	2.50422e-7	8.5119	15	1.39%	378	1.60380e-6	6.7086	12	31	1.15%
	TS25_renal-urinary system	28	1.33328e-9	4.44602e-7	2.6166	51	4.72%	108	3.46905e-12	3.4809	47	234	4.51%
	TS28_gonad	42	2.57757e-8	5.73018e-6	17.9165	8	0.74%	1462	2.16040e-2	3.4661	7	35	0.67%
	TS15_somite 13	47	5.30925e-8	1.05473e-5	118.0908	4	0.37%	1083	6.32221e-3	12.9978	3	4	0.29%
MSigDB Perturbation	Genes with high-CpG-density promoters (HCP) bearing the H3K27 tri-methylation (H3K27me3) mark in brain.	1	8.30231e-30	2.79290e-26	5.2941	73	6.75%	5	2.21066e-25	4.6303	70	262	6.72%
	Genes with high-CpG-density promoters (HCP) bearing histone H3 trimethylation mark at K27 (H3K27me3) in neural progenitor cells (NPC).	4	4.19896e-16	3.53133e-13	2.7831	82	7.59%	7	5.79803e-24	4.0316	77	331	7.40%
	Genes with high-CpG-density promoters (HCP) bearing the H3K27 tri-methylation (H3K27me3) mark in neural precursor cells (NPC).	6	9.92788e-14	5.56623e-11	5.2551	32	2.96%	9	2.60776e-12	6.0769	27	77	2.59%
	Genes up-regulated in ME-A cells (breast cancer) undergoing apoptosis in response to doxorubicin [PubChem=31703].	7	3.88574e-13	1.86738e-10	2.1967	101	9.34%	34	1.28788e-3	1.5342	98	1107	9.41%
	Genes with high-CpG-density promoters (HCP) that have no histone H3 methylation marks in neural precursor cells (NPC).	8	4.15202e-12	1.74592e-9	2.4799	73	6.75%	12	2.46031e-10	2.4709	72	505	6.92%
	Genes with high-CpG-density promoters (HCP) bearing histone H3 dimethylation mark at K4 (H3K4me2) and trimethylation mark at K27 (H3K27me3) in neural precursor cells (NPC).	10	2.22736e-11	7.49284e-9	2.4063	72	6.66%	8	1.92271e-18	3.5680	70	340	6.72%
	Genes up-regulated in ME-A cells (breast cancer, sensitive to apoptotic stimuli) exposed to doxorubicin [PubChem=31703] in the presence of medium concentrate (MC) from ME-C cells (breast cancer, resistant to apoptotic stimuli).	11	3.13333e-9	9.58228e-7	2.3167	61	5.64%	39	1.77581e-3	1.7388	60	598	5.76%
	Genes up-regulated in luminal-like breast cancer cell lines compared to the mesenchymal-like ones.	13	1.03585e-8	2.68046e-6	2.4810	50	4.63%	28	2.39737e-4	2.0267	49	419	4.71%
	Genes with hypermethylated DNA in lung cancer samples.	14	1.91417e-8	4.59949e-6	2.1383	65	6.01%	10	1.09023e-11	2.8884	62	372	5.96%
	Genes up-regulated in basal-like breast cancer cell lines as compared to the mesenchymal-like ones.	15	3.19802e-8	7.17208e-6	4.2269	22	2.04%	24	5.10104e-5	3.4042	22	112	2.11%
	Genes up-regulated in NB4 cells (acute promyelocytic leukemia, APL) in response to tretinoin [PubChem=444795]; based on Chip-seq data.	16	6.40216e-8	1.34605e-5	2.0161	69	6.38%	80	3.07319e-2	1.4867	67	781	6.44%
	Down-regulated genes that vary between HNSCC (head and neck squamous cell carcinoma) groups formed on the basis of their level of pathological differentiation: well vs poorly differentiated tumors.	21	5.20232e-7	8.33362e-5	2.3116	44	4.07%	30	3.86655e-4	2.0778	44	367	4.23%
	Genes up-regulated in glioma cell lines treated with both decitabine [PubChem=451668] and TSA [PubChem=5562].	22	7.57813e-7	1.15876e-4	3.9413	19	1.76%	71	1.88794e-2	2.4371	18	128	1.73%
	Genes down-regulated in NSCLC (non-small cell lung carcinoma) cell lines resistant to gefitinib [PubChem=123631] compared to the sensitive ones.	23	7.63741e-7	1.11705e-4	2.7058	32	2.96%	25	7.58778e-5	2.6159	32	212	3.07%
	Genes down-regulated in lymph nodes from patients with mantle cell lymphoma (MCL) compared to the non-malignant hyperplastic lymph nodes.	26	2.84035e-6	3.67497e-4	6.1499	11	1.02%	42	3.36670e-3	4.5606	10	38	0.96%
	Genes consistently down-regulated in mammary stem cells both in mouse and human species.	28	5.63723e-6	6.77273e-4	2.1470	42	3.89%	66	1.80860e-2	1.7372	42	419	4.03%
	Genes with high-CpG-density promoters (HCP) bearing the bivalent histone H3 trimethylation mark at K4 and K27 (H3K4me3 and H3K27me3) in neural progenitor cells (NPC).	35	1.59968e-5	1.53752e-3	2.0958	40	3.70%	15	8.75987e-8	3.1588	37	203	3.55%
	Genes associated with migration rate of 40 human bladder cancer cells.	37	2.45822e-5	2.23499e-3	2.2729	32	2.96%	21	8.46315e-6	2.9519	31	182	2.98%
	Genes bearing H3K27me3 mark or whose promoters are bound by the polycomb proteins SUZ12 or EED [GeneID=23512;8726]; their DNA is methylated de novo in cancer.	45	8.89241e-5	6.64757e-3	2.4907	23	2.13%	18	3.62694e-6	4.1357	21	88	2.02%
	Selected genes down-regulated in the TLX1 [GeneID=3195] Tet On iEBHX15-4 cells (pro-erythroblasts) at 6 h time point.	48	1.06872e-4	7.48997e-3	3.8149	12	1.11%	49	5.84373e-3	4.2269	10	41	0.96%
MSigDB Predicted Promoter Motifs	Motif KRCTCNNNNMANAGC (no known TF)	2	6.44217e-7	1.98097e-4	7.1880	11	1.02%	283	3.29667e-2	2.1937	10	79	0.96%
	Motif VNNVTCACCCYA (no known TF)	3	2.57803e-6	5.28497e-4	2.3938	36	3.33%	58	5.20018e-4	2.1490	31	250	2.98%
	Motif RGCAGSTG matches MYOG: myogenin (myogenic factor 4)	4	5.18127e-6	7.96620e-4	2.3509	35	3.24%	19	4.04184e-5	2.4450	34	241	3.27%
	Motif NNTTTCCN matches STAT1: signal transducer and activator of transcription 1, 91kDa	6	1.79740e-5	1.84233e-3	2.2437	34	3.15%	36	1.58610e-4	2.3011	32	241	3.07%
	Motif GRGGSTGGG (no known TF)	7	2.81904e-5	2.47673e-3	2.3287	30	2.78%	127	4.47438e-3	1.9422	26	232	2.50%
	Motif NRCCACGTGASN (no known TF)	8	4.08792e-5	3.14259e-3	2.3603	28	2.59%	176	1.02156e-2	1.8404	24	226	2.31%
	Motif CACGTGS matches MYC: v-myc myelocytomatosis viral oncogene homolog (avian)	9	5.09295e-5	3.48019e-3	2.8125	20	1.85%	186	1.09611e-2	1.9472	20	178	1.92%
	Motif NGGGACTTTCCA (no known TF)	12	1.39085e-4	7.12809e-3	2.0400	33	3.05%	101	2.30847e-3	1.9709	29	255	2.79%
	Motif CACSCCA matches SREBF1: sterol regulatory element binding transcription factor 1	13	1.87761e-4	8.88255e-3	2.0583	31	2.87%	84	1.73329e-3	2.0562	28	236	2.69%
	Motif NNRYCACGTGRYNN (no known TF)	14	2.29308e-4	1.00732e-2	2.1965	26	2.41%	315	4.79535e-2	1.5690	22	243	2.11%
	Motif TGACCTTTGNCCY matches PPARA: peroxisome proliferative activated receptor, alpha	17	3.73014e-4	1.34943e-2	2.0291	29	2.68%	133	5.33069e-3	1.8868	27	248	2.59%
	Motif GGGGAGGG matches MAZ: MYC-associated zinc finger protein (purine-binding transcription factor)	18	3.76398e-4	1.28603e-2	2.4094	20	1.85%	209	1.42098e-2	1.8837	20	184	1.92%
	Motif NNNNNRTCACGTGAYNNNNN matches ARNT: aryl hydrocarbon receptor nuclear translocator	19	4.28458e-4	1.38685e-2	2.1423	25	2.31%	303	4.21846e-2	1.5953	22	239	2.11%
	Motif CANTTCCS matches STAT1: signal transducer and activator of transcription 1, 91kDa	25	6.23885e-4	1.53476e-2	2.0515	26	2.41%	254	2.45142e-2	1.6637	24	250	2.31%
	Motif TTTNNANAGCYR (no known TF)	26	8.04791e-4	1.90364e-2	2.2116	21	1.94%	163	7.69142e-3	2.1221	18	147	1.73%
	Motif YRCCAKNNGNCGC (no known TF)	27	8.30985e-4	1.89280e-2	3.0247	12	1.11%	181	1.04416e-2	2.7509	10	63	0.96%
	Motif CASGYG (no known TF)	33	1.27918e-3	2.38393e-2	2.0860	22	2.04%	318	4.94777e-2	1.5626	22	244	2.11%
	Motif YGTCCTTGR (no known TF)	34	1.40406e-3	2.53969e-2	2.3320	17	1.57%	129	4.58179e-3	2.5811	14	94	1.34%
InterPro	Homeodomain, metazoa	1	1.27923e-30	1.20529e-26	10.5629	45	4.16%	3	3.33425e-23	7.7234	41	92	3.94%
	Homeobox, conserved site	2	5.17071e-27	2.43592e-23	4.9620	70	6.48%	1	1.26522e-29	5.9919	65	188	6.24%
	Homeobox domain	3	2.07109e-23	6.50462e-20	3.8785	78	7.22%	2	1.79701e-28	5.1349	72	243	6.92%
	Homeobox protein, antennapedia type, conserved site	4	8.33582e-23	1.96350e-19	112.9744	13	1.20%	5	4.38360e-6	9.5317	11	20	1.06%
	Homeodomain-like	5	3.53336e-19	6.65826e-16	3.1567	82	7.59%	4	6.53017e-23	4.0279	76	327	7.30%
	Homeobox protein, antennapedia type	6	2.73904e-17	4.30120e-14	98.7394	10	0.93%	6	7.55759e-5	11.5536	8	12	0.77%
	Helix-turn-helix motif	10	2.71074e-7	2.55406e-4	6.3163	13	1.20%	7	9.55223e-5	6.0891	13	37	1.25%
HGNC Gene Families	HOXL	1	4.75397e-28	2.27240e-25	24.1402	27	2.50%	1	6.18500e-14	7.9987	24	52	2.31%
	NKL	2	5.85069e-10	1.39832e-7	6.2715	19	1.76%	2	1.37767e-9	6.8600	19	48	1.83%
	PRD	5	1.64087e-6	1.56868e-4	4.9535	14	1.30%	3	2.60254e-4	4.7935	13	47	1.25%
	BHLH	7	3.08409e-4	2.10600e-2	2.5173	19	1.76%	4	1.97048e-2	2.8009	16	99	1.54%
MSigDB Oncogenic Signatures	Genes up-regulated in MCF-7 cells (breast cancer) over-expressing a mutant K112E form of CCND1 [Gene ID=595] gene.	2	2.93342e-5	2.74274e-3	2.6190	24	2.22%	4	1.18588e-2	2.1891	24	190	2.31%
	Genes down-regulated in NCI-60 panel of cell lines with mutated TP53 [Gene ID=7157].	4	4.53854e-5	2.12177e-3	2.1685	33	3.05%	1	1.87130e-5	2.8730	31	187	2.98%
	Genes up-regulated in myometrial cells over-expressing ATF2 [Gene ID=1386] gene.	6	6.97587e-5	2.17415e-3	2.4213	25	2.31%	8	1.92353e-2	2.0949	22	182	2.11%
	Genes down-regulated in retina cells from CRX [Gene ID=1406] knockout mice.	7	1.72059e-4	4.59643e-3	2.5637	20	1.85%	2	4.57074e-3	2.6869	20	129	1.92%
	Genes up-regulated in myometrial cells over-expressing a shortened splice form of ATF2 [Gene ID=1386] gene.	8	4.37292e-4	1.02217e-2	2.0377	28	2.59%	9	2.28426e-2	2.0498	22	186	2.11%
	Genes up-regulated in HUVEC cells (endothelium) by treatment with VEGFA [Gene ID=7422].	10	1.01267e-3	1.89369e-2	2.1256	22	2.04%	10	2.20629e-2	2.0389	22	187	2.11%
The test set of 1,081 genomic regions picked 1,041 genes (6%) of all 18,041 genes.
GO Molecular Function has 3,688 terms covering 15,090 (84%) of all 18,041 genes.	3,688 ontology terms were tested (100%) using an annotation count range of [1, Inf].
GO Biological Process has 10,440 terms covering 15,441 (86%) of all 18,041 genes.	10,440 ontology terms were tested (100%) using an annotation count range of [1, Inf].
Mouse Phenotype has 7,918 terms covering 7,524 (42%) of all 18,041 genes.	7,918 ontology terms were tested (100%) using an annotation count range of [1, Inf].
Disease Ontology has 2,235 terms covering 7,886 (44%) of all 18,041 genes.	2,235 ontology terms were tested (100%) using an annotation count range of [1, Inf].
MGI Expression: Detected has 9,337 terms covering 11,602 (64%) of all 18,041 genes.	9,337 ontology terms were tested (100%) using an annotation count range of [1, Inf].
MSigDB Perturbation has 3,364 terms covering 17,091 (95%) of all 18,041 genes.	3,364 ontology terms were tested (100%) using an annotation count range of [1, Inf].
MSigDB Predicted Promoter Motifs has 615 terms covering 11,991 (66%) of all 18,041 genes.	615 ontology terms were tested (100%) using an annotation count range of [1, Inf].
InterPro has 9,422 terms covering 17,343 (96%) of all 18,041 genes.	9,422 ontology terms were tested (100%) using an annotation count range of [1, Inf].
HGNC Gene Families has 478 terms covering 7,310 (41%) of all 18,041 genes.	478 ontology terms were tested (100%) using an annotation count range of [1, Inf].
MSigDB Oncogenic Signatures has 187 terms covering 10,315 (57%) of all 18,041 genes.	187 ontology terms were tested (100%) using an annotation count range of [1, Inf].
GREAT version 3.0.0
Species assembly: hg19
Association rule: Single nearest gene: 1000000 bp max extension, curated regulatory domains included

## Sheet: TableS6B_TSS200_hyper
Table S6B: full results of GREAT annotation for the hypermethylated regions in the TSS200 category in LMS compared to NM
Ontology	# Term Name	Binom Rank	Binom Raw P-Value	Binom FDR Q-Val	Binom Fold Enrichment	Binom Observed Region Hits	Binom Region Set Coverage	Hyper Rank	Hyper FDR Q-Val	Hyper Fold Enrichment	Hyper Observed Gene Hits	Hyper Total Genes	Hyper Gene Set Coverage
Placenta Disorders	Genes with SNPs significantly associated with pre-eclampsia	1	5.05779e-3	1.51734e-2	2.8567	9	1.45%	1	3.01834e-2	2.6772	8	90	1.34%
MGI Expression: Detected	TS19_C6 vertebral cartilage condensation	1	2.74308e-9	2.56122e-5	248.3171	4	0.64%	19	8.40966e-3	20.0790	4	6	0.67%
	TS19_C7 vertebral cartilage condensation	2	5.16263e-9	2.41017e-5	211.8897	4	0.64%	30	1.21004e-2	17.2106	4	7	0.67%
	TS19_T1 vertebral cartilage condensation	3	8.60530e-9	2.67826e-5	186.3860	4	0.64%	38	1.86033e-2	15.0593	4	8	0.67%
	TS19_T2 vertebral cartilage condensation	4	1.21188e-8	2.82883e-5	171.0305	4	0.64%	45	2.75340e-2	13.3860	4	9	0.67%
	TS19_T3 vertebral cartilage condensation	4	1.21188e-8	2.82883e-5	171.0305	4	0.64%	45	2.75340e-2	13.3860	4	9	0.67%
	TS19_T4 vertebral cartilage condensation	6	1.97833e-8	3.07861e-5	151.2167	4	0.64%	60	3.35142e-2	12.0474	4	10	0.67%
	TS19_T5 vertebral cartilage condensation	6	1.97833e-8	3.07861e-5	151.2167	4	0.64%	60	3.35142e-2	12.0474	4	10	0.67%
	TS19_T6 vertebral cartilage condensation	6	1.97833e-8	3.07861e-5	151.2167	4	0.64%	60	3.35142e-2	12.0474	4	10	0.67%
	TS19_T7 vertebral cartilage condensation	6	1.97833e-8	3.07861e-5	151.2167	4	0.64%	60	3.35142e-2	12.0474	4	10	0.67%
	TS19_T8 vertebral cartilage condensation	6	1.97833e-8	3.07861e-5	151.2167	4	0.64%	60	3.35142e-2	12.0474	4	10	0.67%
	TS19_T9 vertebral cartilage condensation	6	1.97833e-8	3.07861e-5	151.2167	4	0.64%	60	3.35142e-2	12.0474	4	10	0.67%
	TS19_T10 vertebral cartilage condensation	6	1.97833e-8	3.07861e-5	151.2167	4	0.64%	60	3.35142e-2	12.0474	4	10	0.67%
	TS19_T11 vertebral cartilage condensation	6	1.97833e-8	3.07861e-5	151.2167	4	0.64%	60	3.35142e-2	12.0474	4	10	0.67%
	TS19_cervical vertebral cartilage condensation	14	6.14623e-8	4.09910e-5	113.7024	4	0.64%	60	3.35142e-2	12.0474	4	10	0.67%
MSigDB Perturbation	Genes with high-CpG-density promoters (HCP) that have no histone H3 methylation marks in neural precursor cells (NPC).	1	1.87993e-13	6.32407e-10	3.1933	54	8.70%	1	1.37097e-9	3.1013	52	505	8.68%
	Genes up-regulated in NB4 cells (acute promyelocytic leukemia, APL) in response to tretinoin [PubChem=444795]; based on Chip-seq data.	3	2.45047e-8	2.74779e-5	2.4414	48	7.73%	23	3.50140e-2	1.7354	45	781	7.51%
	Genes with intermediate-CpG-density (ICP) promoters bearing histone H3 K4 trimethylation mark (H3K4me3) in embryonic stem cells (ES).	4	2.45433e-8	2.06409e-5	2.4996	46	7.41%	10	1.02738e-3	2.0586	46	673	7.68%
	Genes up-regulated in glioma cell lines treated with both decitabine [PubChem=451668] and TSA [PubChem=5562].	6	2.23137e-7	1.25106e-4	5.4164	15	2.42%	18	1.70124e-2	3.2942	14	128	2.34%
	Genes with high-CpG-density promoters (HCP) bearing the H3K27 tri-methylation (H3K27me3) mark in brain.	7	2.28278e-7	1.09704e-4	3.2823	26	4.19%	4	4.61996e-5	3.2188	28	262	4.67%
	Genes down-regulated in nsopharyngeal carcinoma relative to the normal tissue.	8	5.56870e-7	2.34164e-4	3.1280	26	4.19%	11	1.39679e-3	2.7682	25	272	4.17%
	Genes down-regulated in NSCLC (non-small cell lung carcinoma) cell lines resistant to gefitinib [PubChem=123631] compared to the sensitive ones.	11	8.01269e-6	2.45043e-3	3.0910	21	3.38%	13	2.16474e-3	2.9834	21	212	3.51%
	Genes with high-CpG-density promoters (HCP) with unmethylated histone H3 in MEF cells (embryonic fibroblast).	12	2.08337e-5	5.84039e-3	2.6639	24	3.86%	9	8.92245e-4	3.1255	22	212	3.67%
	Genes with hypermethylated DNA in lung cancer samples.	13	2.28314e-5	5.90807e-3	2.1188	37	5.96%	3	3.61324e-5	2.8337	35	372	5.84%
	Cluster 3 of aberrantly hypermethylated genes in blasts from AML (acute myeloid leukemia) patients.	15	2.85673e-5	6.40669e-3	3.4248	16	2.58%	24	3.57229e-2	2.8594	15	158	2.50%
	Genes up-regulated in the pancreatic cancer cell lines (AsPC1, Hs766T, MiaPaCa2, Panc1) but not in the non-neoplastic cells (HPDE) by decitabine (5-aza-2'-deoxycytidine) [PubChem=451668].	16	3.56018e-5	7.48527e-3	2.2493	31	4.99%	21	2.68029e-2	2.0846	29	419	4.84%
	Genes up-regulated in basal-like breast cancer cell lines as compared to the mesenchymal-like ones.	19	6.51372e-5	1.15327e-2	4.0134	12	1.93%	27	4.30012e-2	3.2270	12	112	2.00%
InterPro	Cadherin, N-terminal	1	7.31174e-13	6.88912e-9	7.5259	22	3.54%	5	1.19244e-2	5.2588	11	63	1.84%
	Homeobox protein, antennapedia type, conserved site	2	1.06946e-10	5.03824e-7	90.7657	6	0.97%	7	4.57838e-2	9.0356	6	20	1.00%
	Homeobox protein, antennapedia type	3	5.20970e-9	1.63619e-5	85.9399	5	0.81%	6	4.06552e-2	12.5494	5	12	0.83%
	Homeodomain, metazoa	4	4.68156e-8	1.10274e-4	6.1291	15	2.42%	4	1.89656e-5	5.5654	17	92	2.84%
	Homeobox, conserved site	7	1.16620e-5	1.56970e-2	2.8380	23	3.70%	2	3.45261e-6	4.1653	26	188	4.34%
	Homeobox domain	17	6.01769e-5	3.33522e-2	2.3370	27	4.35%	1	5.69439e-6	3.7183	30	243	5.01%
HGNC Gene Families	HOXL	1	2.74831e-8	1.31369e-5	14.0073	9	1.45%	1	4.70887e-5	6.9504	12	52	2.00%
	CLDN	2	1.34038e-5	3.20351e-3	12.0754	6	0.97%	2	1.10632e-2	8.6053	6	21	1.00%
The test set of 621 genomic regions picked 599 genes (3%) of all 18,041 genes.
Placenta Disorders has 3 terms covering 691 (4%) of all 18,041 genes.	3 ontology terms were tested (100%) using an annotation count range of [1, Inf].
MGI Expression: Detected has 9,337 terms covering 11,602 (64%) of all 18,041 genes.	9,337 ontology terms were tested (100%) using an annotation count range of [1, Inf].
MSigDB Perturbation has 3,364 terms covering 17,091 (95%) of all 18,041 genes.	3,364 ontology terms were tested (100%) using an annotation count range of [1, Inf].
InterPro has 9,422 terms covering 17,343 (96%) of all 18,041 genes.	9,422 ontology terms were tested (100%) using an annotation count range of [1, Inf].
HGNC Gene Families has 478 terms covering 7,310 (41%) of all 18,041 genes.	478 ontology terms were tested (100%) using an annotation count range of [1, Inf].
GREAT version 3.0.0
Species assembly: hg19
Association rule: Single nearest gene: 1000000 bp max extension, curated regulatory domains included

## Sheet: TableS6C_5'UTR_hyper
Table S6C: full results of GREAT annotation for the hypermethylated regions in the 5'UTR category in LMS compared to NM
Ontology	# Term Name	Binom Rank	Binom Raw P-Value	Binom FDR Q-Val	Binom Fold Enrichment	Binom Observed Region Hits	Binom Region Set Coverage	Hyper Rank	Hyper FDR Q-Val	Hyper Fold Enrichment	Hyper Observed Gene Hits	Hyper Total Genes	Hyper Gene Set Coverage
GO Biological Process	type I interferon-mediated signaling pathway	11	1.72790e-6	1.63993e-3	6.4818	11	1.05%	276	3.20867e-2	3.0370	11	64	1.08%
	cellular response to type I interferon	13	1.84574e-6	1.48227e-3	6.4368	11	1.05%	287	3.52768e-2	2.9903	11	65	1.08%
	response to type I interferon	14	2.05635e-6	1.53345e-3	6.3637	11	1.05%	299	3.85932e-2	2.9450	11	66	1.08%
	regulation of cell shape	30	2.09637e-5	7.29538e-3	3.1077	19	1.81%	115	1.10357e-3	3.0521	19	110	1.86%
	Fc receptor signaling pathway	47	1.57136e-4	3.49042e-2	2.0795	31	2.95%	125	1.75508e-3	2.3187	29	221	2.84%
	thyroid gland development	56	2.23772e-4	4.17176e-2	5.9332	7	0.67%	152	3.45425e-3	6.5100	7	19	0.69%
GO Cellular Component	focal adhesion	1	1.37093e-6	1.73423e-3	3.2598	23	2.19%	2	7.18161e-4	3.1024	23	131	2.25%
	cell-substrate adherens junction	2	1.93026e-6	1.22089e-3	3.1924	23	2.19%	3	8.21615e-4	3.0104	23	135	2.25%
	cell-substrate junction	3	2.63852e-6	1.11258e-3	2.9592	25	2.38%	1	4.70939e-4	3.1109	25	142	2.45%
	adherens junction	11	3.41728e-4	3.92987e-2	2.0400	29	2.76%	4	9.29534e-4	2.5621	29	200	2.84%
Mouse Phenotype	abnormal thyroid gland development	20	1.31738e-5	5.21550e-3	9.3771	7	0.67%	71	4.90697e-4	8.8350	7	14	0.69%
	abnormal megakaryocyte progenitor cell morphology	21	1.46757e-5	5.53342e-3	2.2662	34	3.24%	117	2.73562e-3	2.1127	33	276	3.23%
	abnormal platelet morphology	25	3.03486e-5	9.61202e-3	2.3187	30	2.86%	127	3.51105e-3	2.1993	29	233	2.84%
	abnormal thrombopoiesis	31	3.55234e-5	9.07335e-3	2.2983	30	2.86%	136	4.46501e-3	2.1621	29	237	2.84%
	abnormal megakaryocyte morphology	32	4.05094e-5	1.00236e-2	2.2123	32	3.05%	161	6.23067e-3	2.0439	31	268	3.04%
	abnormal sinus arrhythmia	45	1.55995e-4	2.74482e-2	5.3860	8	0.76%	109	2.42562e-3	6.8716	7	18	0.69%
	decreased heart rate variability	59	3.22552e-4	4.32876e-2	12.6478	4	0.38%	206	1.19522e-2	10.0971	4	7	0.39%
	abnormal platelet cell number	60	3.34120e-4	4.40927e-2	2.2211	24	2.29%	270	2.15962e-2	2.0735	23	196	2.25%
Disease Ontology	lung neoplasm	18	2.70389e-4	3.35734e-2	3.2418	13	1.24%	35	1.38108e-2	3.3131	12	64	1.18%
MGI Expression: Detected	TS19_cervical vertebral cartilage condensation	3	5.85069e-9	1.82093e-5	84.0586	5	0.48%	637	2.38377e-2	7.0680	4	10	0.39%
	TS20_T5 vertebral cartilage condensation	58	6.73712e-5	1.08456e-2	19.1080	4	0.38%	540	1.19724e-2	13.2524	3	4	0.29%
	TS20_T6 vertebral cartilage condensation	58	6.73712e-5	1.08456e-2	19.1080	4	0.38%	540	1.19724e-2	13.2524	3	4	0.29%
	TS20_T7 vertebral cartilage condensation	58	6.73712e-5	1.08456e-2	19.1080	4	0.38%	540	1.19724e-2	13.2524	3	4	0.29%
	TS20_T3 vertebral cartilage condensation	62	7.14795e-5	1.07646e-2	18.8152	4	0.38%	643	2.40756e-2	10.6020	3	5	0.29%
	TS20_T4 vertebral cartilage condensation	62	7.14795e-5	1.07646e-2	18.8152	4	0.38%	643	2.40756e-2	10.6020	3	5	0.29%
	TS23_oesophagus epithelium	64	8.28908e-5	1.20930e-2	3.6665	13	1.24%	437	5.37963e-3	3.2621	12	65	1.18%
	TS21_germ cell of testis	67	1.03026e-4	1.43575e-2	5.0278	9	0.86%	588	1.73874e-2	3.7200	8	38	0.78%
	TS23_pharynx epithelium	77	1.73931e-4	2.10909e-2	3.6158	12	1.14%	550	1.25565e-2	3.0852	11	63	1.08%
	TS23_oral epithelium	82	1.90630e-4	2.17063e-2	2.1845	27	2.57%	220	4.74789e-4	2.5382	26	181	2.55%
	TS23_4th ventricle lateral recess	84	1.95165e-4	2.16935e-2	3.5699	12	1.14%	681	2.86132e-2	2.8967	10	61	0.98%
	TS23_pelvic urethra of female	92	2.81040e-4	2.85225e-2	2.2057	25	2.38%	153	5.08584e-5	2.9848	25	148	2.45%
	TS23_naso-lacrimal duct	93	2.83823e-4	2.84953e-2	3.4233	12	1.14%	313	1.76012e-3	4.0494	11	48	1.08%
	TS15_axial skeleton	98	3.97409e-4	3.78634e-2	21.6760	3	0.29%	540	1.19724e-2	13.2524	3	4	0.29%
	TS23_urinary bladder trigone urothelium	103	5.24829e-4	4.75760e-2	2.3447	20	1.90%	459	6.31217e-3	2.3560	20	150	1.96%
MSigDB Perturbation	Transcripts depleted in pseudopodia of NIH/3T3 cells (fibroblast) in response to the chemotactic migration stimulus by lysophosphatidic acid (LPA) [PubChem=3988].	3	1.14508e-7	1.28401e-4	2.2906	50	4.76%	28	2.32335e-3	1.8806	48	451	4.70%
	Genes up-regulated in luminal-like breast cancer cell lines compared to the mesenchymal-like ones.	4	1.81954e-7	1.53023e-4	2.3499	46	4.38%	32	2.93953e-3	1.8977	45	419	4.41%
	Genes bound by ESR1 [GeneID=2099] and up-regulated by estradiol [PubChemID=5757] in MCF-7 cells (breast cancer) expressing constitutevly active form of AKT1 [GeneID=207].	5	2.05394e-7	1.38189e-4	2.6759	36	3.43%	43	6.03451e-3	2.0712	32	273	3.13%
	Genes with high-CpG-density promoters (HCP) that have no histone H3 methylation marks in neural precursor cells (NPC).	6	2.73870e-7	1.53550e-4	2.0635	59	5.62%	9	8.33732e-5	2.0294	58	505	5.68%
	Genes with high-CpG-density promoters (HCP) bearing the H3K27 tri-methylation (H3K27me3) mark in brain.	7	5.15629e-7	2.47796e-4	2.6132	35	3.33%	18	1.00887e-3	2.2930	34	262	3.33%
	Genes up-regulated in the pancreatic cancer cell lines (AsPC1, Hs766T, MiaPaCa2, Panc1) but not in the non-neoplastic cells (HPDE) by decitabine (5-aza-2'-deoxycytidine) [PubChem=451668].	8	1.68231e-6	7.07410e-4	2.1027	49	4.67%	20	1.00106e-3	1.9821	47	419	4.60%
	Genes whose expression peaked at 480 min after stimulation of HeLa cells with EGF [GeneID=1950].	12	6.32647e-6	1.77352e-3	2.8838	24	2.29%	50	8.93316e-3	2.3849	22	163	2.15%
	Up-regulated genes distinguishing in multiple myeloma (MM) samples with higher expression of TACI [GeneID=23495].	15	1.99341e-5	4.47055e-3	2.0127	43	4.10%	52	9.60373e-3	1.8249	41	397	4.02%
	Genes repressed in the time interval between two pulses of EGF [GeneID =1950] in 184A1 cells (mammary epithelium).	16	2.03021e-5	4.26852e-3	2.4128	29	2.76%	14	4.19888e-4	2.6278	29	195	2.84%
	Genes down-regulated in NSCLC (non-small cell lung carcinoma) cell lines resistant to gefitinib [PubChem=123631] compared to the sensitive ones.	17	2.34810e-5	4.64647e-3	2.4375	28	2.67%	31	2.79090e-3	2.3338	28	212	2.74%
	Genes with promoters occupied by PML-RARA fusion [GeneID=5371,5914] protein in acute promyelocytic leukemia(APL) cells NB4 and two APL primary blasts, based on Chip-seq data.	22	2.93865e-5	4.49346e-3	2.0170	41	3.90%	89	3.92614e-2	1.6709	40	423	3.92%
	Top genes up-regulated in mesenchyme stem cells (MSC) grown in a tumor conditioned medium, which leads to carcinoma-associated fibroblast phenotype.	25	4.02584e-5	5.41717e-3	7.8530	7	0.67%	70	1.70983e-2	4.9476	7	25	0.69%
	Genes up-regulated in basal-like breast cancer cell lines as compared to the mesenchymal-like ones.	31	7.41119e-5	8.04233e-3	3.1649	16	1.52%	75	2.50406e-2	2.5243	16	112	1.57%
	Amplification hot spot 8: colocolized fragile sites and cancer genes in the 9q11-34 region.	33	9.35594e-5	9.53738e-3	8.4932	6	0.57%	29	2.58341e-3	8.8350	6	12	0.59%
	Genes up-regulated by FOXP3 [GeneID=50943] in both ex vivo and hybridoma cells.	34	1.06105e-4	1.04981e-2	3.5749	13	1.24%	80	3.11020e-2	3.0852	11	63	1.08%
	Prmary innate immune response genes induced in 293T cells (embryonic kidney) by overexpression of STING (TMEM173) [GeneID=340061].	35	1.08705e-4	1.04481e-2	16.8607	4	0.38%	88	3.90450e-2	7.8533	4	9	0.39%
	Cluster 4 of method A: up-regulation of these genes in patients with non-small cell lung cancer (NSCLC) predicts good survival outcome.	39	1.71206e-4	1.47676e-2	2.1633	28	2.67%	34	3.16866e-3	2.3928	26	192	2.55%
	Set 'Set 'ES exp2': genes overexpressed in human embryonic stem cells according to a meta-analysis of 8 profiling studies.	42	2.09664e-4	1.67931e-2	5.1529	8	0.76%	95	4.63950e-2	3.6246	8	39	0.78%
	Genes enriched in oligodendrocytes in the adult mouse brain identified through correlation-based searches seeded with the oligodendrocyte cell-type specific gene expression patterns.	43	2.15278e-4	1.68417e-2	3.1474	14	1.33%	59	1.34774e-2	3.1042	13	74	1.27%
	Cluster P3 of genes with similar expression profiles in peripheral T lymphocytes after FOXP3 [GeneID=50943] loss of function (LOF).	44	2.16940e-4	1.65861e-2	2.3386	23	2.19%	38	4.98907e-3	2.5243	22	154	2.15%
MSigDB Predicted Promoter Motifs	Motif WGGAATGY matches TEAD1: TEA domain family member 1 (SV40 transcriptional enhancer factor)	2	4.07659e-6	1.25355e-3	2.0518	48	4.57%	17	1.54752e-5	2.2211	45	358	4.41%
	Motif GGGGAGGG matches MAZ: MYC-associated zinc finger protein (purine-binding transcription factor)	4	1.15822e-5	1.78076e-3	2.8526	23	2.19%	144	7.43156e-3	2.0167	21	184	2.06%
	Motif TTCYNRGAA matches STAT5B: signal transducer and activator of transcription 5B	7	2.94937e-5	2.59123e-3	2.0373	40	3.81%	33	2.36799e-4	2.0983	38	320	3.72%
	Motif GTTRYCATRR (no known TF)	8	8.22294e-5	6.32138e-3	2.6356	21	2.00%	259	3.89215e-2	1.8008	16	157	1.57%
	Motif NNGGGGCGGGGNN matches SP1: Sp1 transcription factor	9	8.68543e-5	5.93504e-3	2.1840	30	2.86%	94	2.56697e-3	1.9950	28	248	2.74%
	Motif NNNNKGGRAANTCCCN (no known TF)	10	1.02090e-4	6.27853e-3	2.1320	31	2.95%	28	1.28087e-4	2.3920	31	229	3.04%
	Motif GGCNKCCATNK (no known TF)	11	1.19293e-4	6.66956e-3	2.9144	17	1.62%	151	8.52029e-3	2.3048	15	115	1.47%
	Motif NGGGACTTTCCA (no known TF)	12	1.78689e-4	9.15781e-3	2.0366	32	3.05%	57	5.38356e-4	2.1481	31	255	3.04%
	Motif TTCCCGKAA (no known TF)	13	2.42804e-4	1.14865e-2	2.0842	29	2.76%	67	9.49802e-4	2.1263	29	241	2.84%
	Motif GGGRATTTCC matches RELA: v-rel reticuloendotheliosis viral oncogene homolog A, nuclear factor of kappa light polypeptide gene enhancer in B-cells 3, p65 (avian)	14	3.28037e-4	1.44102e-2	2.0453	29	2.76%	55	4.57966e-4	2.2377	29	229	2.84%
	Motif CASGYG (no known TF)	15	3.79998e-4	1.55799e-2	2.2452	23	2.19%	282	4.60439e-2	1.5932	22	244	2.15%
	Motif RYTGCNWTGGNR (no known TF)	21	8.47972e-4	2.48335e-2	2.4460	17	1.62%	206	2.03296e-2	2.1671	13	106	1.27%
	Motif NTGACGTCANYS (no known TF)	22	9.30754e-4	2.60188e-2	2.0258	25	2.38%	92	2.16444e-3	2.1968	23	185	2.25%
	Motif ACWTCCK matches ETV4: ets variant gene 4 (E1A enhancer binding protein, E1AF)	25	1.20633e-3	2.96758e-2	2.0563	23	2.19%	245	3.46585e-2	1.6387	23	248	2.25%
InterPro	Interferon regulatory factor DNA-binding domain	3	2.62260e-6	8.23670e-3	16.1534	6	0.57%	1	2.21122e-2	11.7799	6	9	0.59%
	Interferon regulatory factor, conserved site	3	2.62260e-6	8.23670e-3	16.1534	6	0.57%	1	2.21122e-2	11.7799	6	9	0.59%
	Interferon regulatory factor-3	6	7.96549e-6	1.25085e-2	19.2027	5	0.48%	3	3.44599e-2	12.6214	5	7	0.49%
MSigDB Oncogenic Signatures	Genes down-regulated in mouse fibroblasts over-expressing E2F1 [Gene ID=1869] gene.	1	1.94137e-4	3.63036e-2	2.1819	27	2.57%	1	1.58351e-3	2.5243	27	189	2.64%
MSigDB Immunologic Signatures	Genes up-regulated in comparison of macrophages exposed to 50 worms/well B. malayi versus macrophages exposed to M. tuberculosis.	1	8.29693e-7	1.58471e-3	3.1627	25	2.38%	9	2.36041e-2	2.2654	25	195	2.45%
	Genes up-regulated in comparison of adult thymic progenitors versus fetal thymic progenitors.	2	1.85696e-6	1.77340e-3	2.5467	33	3.14%	1	2.78487e-5	2.9903	33	195	3.23%
	Genes down-regulated in comparison of dendritic cells (DC) exposed to 50 worm/well B. malayi versus macrophages exposed to 50 worms/well B. malayi.	3	3.20322e-6	2.03939e-3	3.0058	24	2.29%	20	3.93343e-2	2.1204	24	200	2.35%
	Genes down-regulated in comparison of systemic lupus erythematosus B cells versus systemic lupus erythromatosus myeloid cells.	4	9.42364e-6	4.49979e-3	2.6213	27	2.57%	4	9.56635e-3	2.4095	27	198	2.64%
	Genes down-regulated in comparison of dendritic cells (DC) stimulated with LPS (TLR4 agonist) at 1 h versus DC cells stimulated with CpG DNA (TLR9 agonist) at 1 h.	10	1.01585e-4	1.94028e-2	2.3621	25	2.38%	13	3.28141e-2	2.2087	24	192	2.35%
	Genes down-regulated in comparison of CD4- [GeneID=920] CD8- thymocytes versus CD4- [GeneID=920] CD8+ thymocytes.	13	1.39777e-4	2.05365e-2	2.3605	24	2.29%	11	3.58090e-2	2.2203	24	191	2.35%
	Genes up-regulated in comparison of control dendritic cells (DC) at 24 h versus those stimulated with Pam3Csk4 (TLR1/2 agonist) at 24 h.	16	1.53904e-4	1.83723e-2	2.3450	24	2.29%	16	3.92896e-2	2.1527	24	197	2.35%
	Genes up-regulated in comparison of adult DN2 thymocytes versus fetal DN2 thymocytes.	21	2.16350e-4	1.96776e-2	2.1317	28	2.67%	2	1.31567e-2	2.4592	27	194	2.64%
	Genes up-regulated in comparison of macrophages versus Th2 cells.	27	4.42051e-4	3.12710e-2	2.0358	28	2.67%	2	1.31567e-2	2.4592	27	194	2.64%
	Genes up-regulated in comparison of dendritic cells (DC) versus central memory CD4 [GeneID=920] T cells.	28	4.85169e-4	3.30955e-2	2.1622	24	2.29%	16	3.92896e-2	2.1527	24	197	2.35%
	Genes up-regulated in comparison of CD4 [GeneID=920] CD8 thymocytes stimulated with anti-Valpha2 antibodies versus CD4 [GeneID=920] CD8 thymocytes stimulated with anti-beta5 antibodies.	36	6.78108e-4	3.59774e-2	2.1098	24	2.29%	14	3.85334e-2	2.1748	24	195	2.35%
	Genes up-regulated in comparison of splenic primary CD8 effector T cells at day 8 post-acute infection versus splenic primary CD8 effector T cells at day 8 post-chronic infection.	43	1.04277e-3	4.63184e-2	2.0798	23	2.19%	18	4.01520e-2	2.1733	23	187	2.25%
The test set of 1,050 genomic regions picked 1,021 genes (6%) of all 18,041 genes.
GO Biological Process has 10,440 terms covering 15,441 (86%) of all 18,041 genes.	10,440 ontology terms were tested (100%) using an annotation count range of [1, Inf].
GO Cellular Component has 1,265 terms covering 16,807 (93%) of all 18,041 genes.	1,265 ontology terms were tested (100%) using an annotation count range of [1, Inf].
Mouse Phenotype has 7,918 terms covering 7,524 (42%) of all 18,041 genes.	7,918 ontology terms were tested (100%) using an annotation count range of [1, Inf].
Disease Ontology has 2,235 terms covering 7,886 (44%) of all 18,041 genes.	2,235 ontology terms were tested (100%) using an annotation count range of [1, Inf].
MGI Expression: Detected has 9,337 terms covering 11,602 (64%) of all 18,041 genes.	9,337 ontology terms were tested (100%) using an annotation count range of [1, Inf].
MSigDB Perturbation has 3,364 terms covering 17,091 (95%) of all 18,041 genes.	3,364 ontology terms were tested (100%) using an annotation count range of [1, Inf].
MSigDB Predicted Promoter Motifs has 615 terms covering 11,991 (66%) of all 18,041 genes.	615 ontology terms were tested (100%) using an annotation count range of [1, Inf].
InterPro has 9,422 terms covering 17,343 (96%) of all 18,041 genes.	9,422 ontology terms were tested (100%) using an annotation count range of [1, Inf].
MSigDB Oncogenic Signatures has 187 terms covering 10,315 (57%) of all 18,041 genes.	187 ontology terms were tested (100%) using an annotation count range of [1, Inf].
MSigDB Immunologic Signatures has 1,910 terms covering 16,609 (92%) of all 18,041 genes.	1,910 ontology terms were tested (100%) using an annotation count range of [1, Inf].
GREAT version 3.0.0
Species assembly: hg19
Association rule: Single nearest gene: 1000000 bp max extension, curated regulatory domains included

## Sheet: TableS6D_1st-exon_hyper
Table S6D: full results of GREAT annotation for the hypermethylated regions in the 1st exon category in LMS compared to NM
Ontology	# Term Name	Binom Rank	Binom Raw P-Value	Binom FDR Q-Val	Binom Fold Enrichment	Binom Observed Region Hits	Binom Region Set Coverage	Hyper Rank	Hyper FDR Q-Val	Hyper Fold Enrichment	Hyper Observed Gene Hits	Hyper Total Genes	Hyper Gene Set Coverage
GO Molecular Function	RNA polymerase II distal enhancer sequence-specific DNA binding transcription factor activity	3	4.06131e-7	4.99271e-4	3.9111	20	3.36%	4	5.10012e-9	6.9685	20	91	3.51%
	DNA binding, bending	4	9.55461e-7	8.80935e-4	5.1719	14	2.35%	6	6.68881e-7	8.0707	14	55	2.46%
GO Biological Process	homophilic cell adhesion	1	1.04496e-17	1.09094e-13	4.3720	50	8.40%	1	6.56034e-15	7.2472	32	140	5.62%
	cell-cell adhesion	2	1.29182e-13	6.74328e-10	2.8557	64	10.76%	2	3.99549e-12	4.0179	46	363	8.08%
	calcium-dependent cell-cell adhesion	3	7.08915e-8	2.46703e-4	8.9800	11	1.85%	11	1.33184e-7	13.4143	11	26	1.93%
MSigDB Cancer Neighborhood	Neighborhood of LMO1	6	9.21241e-5	6.55616e-3	5.8104	8	1.34%	1	4.93408e-2	5.2844	8	48	1.41%
PANTHER Pathway	Cadherin signaling pathway	1	1.26016e-20	1.91544e-18	4.9489	52	8.74%	1	1.24685e-17	7.1392	34	151	5.98%
	Wnt signaling pathway	2	5.99023e-17	4.55258e-15	3.6656	58	9.75%	2	5.45197e-13	4.2847	40	296	7.03%
MSigDB Perturbation	Genes with high-CpG-density promoters (HCP) bearing the H3K27 tri-methylation (H3K27me3) mark in brain.	1	3.97863e-20	1.33841e-16	5.7973	44	7.39%	5	6.19166e-18	5.4458	45	262	7.91%
	Set 'Eed targets': genes identified by ChIP on chip as targets of the Polycomb protein EED [GeneID=8726] in human embryonic stem cells.	2	7.10605e-14	1.19524e-10	2.0534	117	19.66%	1	5.77900e-32	3.6597	116	1005	20.39%
	Genes up-regulated in NB4 cells (acute promyelocytic leukemia, APL) in response to tretinoin [PubChem=444795]; based on Chip-seq data.	3	3.21269e-11	3.60249e-8	2.8135	53	8.91%	14	1.75028e-4	2.0705	51	781	8.96%
	Genes with high-CpG-density promoters (HCP) that have no histone H3 methylation marks in neural precursor cells (NPC).	4	5.27037e-11	4.43238e-8	2.9625	48	8.07%	8	1.54621e-7	2.8253	45	505	7.91%
	Genes with hypermethylated DNA in lung cancer samples.	6	1.51724e-10	8.50664e-8	2.8688	48	8.07%	6	1.09740e-12	3.9207	46	372	8.08%
	Set 'PRC2 targets': Polycomb Repression Complex 2 (PRC) targets; identified by ChIP on chip on human embryonic stem cells as genes that: posess the trimethylated H3K27 mark in their promoters and are bound by SUZ12 [GeneID=23512] and EED [GeneID=8726] Polycomb proteins.	7	2.24892e-9	1.08076e-6	2.0364	79	13.28%	4	1.60095e-23	4.0344	78	613	13.71%
	Genes with high-CpG-density promoters (HCP) with unmethylated histone H3 in MEF cells (embryonic fibroblast).	10	2.79593e-8	9.40552e-6	3.3596	29	4.87%	9	2.71187e-7	4.0381	27	212	4.75%
	Genes with intermediate-CpG-density (ICP) promoters bearing histone H3 K4 trimethylation mark (H3K4me3) in embryonic stem cells (ES).	11	1.34718e-7	4.11991e-5	2.4387	43	7.23%	19	1.69627e-3	2.0258	43	673	7.56%
	Genes with high-CpG-density promoters (HCP) bearing histone H3 trimethylation mark at K27 (H3K27me3) in MEF cells (embryonic fibroblast).	12	1.94807e-7	5.46108e-5	2.0936	57	9.58%	7	6.54595e-12	3.1540	57	573	10.02%
	Genes up-regulated in basal-like breast cancer cell lines as compared to the mesenchymal-like ones.	14	3.38456e-7	8.13262e-5	5.2360	15	2.52%	15	5.29807e-4	4.2464	15	112	2.64%
	Genes up-regulated in glioma cell lines treated with both decitabine [PubChem=451668] and TSA [PubChem=5562].	15	7.58128e-7	1.70023e-4	5.2762	14	2.35%	26	6.80865e-3	3.4679	14	128	2.46%
	Genes up-regulated in the pancreatic cancer cell lines (AsPC1, Hs766T, MiaPaCa2, Panc1) but not in the non-neoplastic cells (HPDE) by decitabine (5-aza-2'-deoxycytidine) [PubChem=451668].	16	8.75432e-7	1.84060e-4	2.5747	34	5.71%	17	7.94474e-4	2.4215	32	419	5.62%
	Genes down-regulated in NSCLC (non-small cell lung carcinoma) cell lines resistant to gefitinib [PubChem=123631] compared to the sensitive ones.	18	1.41472e-5	2.64396e-3	3.0724	20	3.36%	20	2.24583e-3	2.9912	20	212	3.51%
	Genes with high-CpG-density promoters (HCP) bearing histone H3 dimethylation mark at K4 (H3K4me2) and trimethylation mark at K27 (H3K27me3) in neural precursor cells (NPC).	22	3.52100e-5	5.38392e-3	2.1252	35	5.88%	10	2.79652e-7	3.2639	35	340	6.15%
	Genes with high-CpG-density promoters (HCP) bearing histone H3 K27 trimethylation mark (H327me3) in embryonic stem cells (ES).	29	1.14632e-4	1.32974e-2	4.0708	11	1.85%	16	6.95546e-4	7.1340	9	40	1.58%
	Unmethylated germline-specific genes with high-CpG-density promoters (HCP) in primary fibroblasts.	30	1.21296e-4	1.36014e-2	5.5795	8	1.34%	22	3.69667e-3	6.5039	8	39	1.41%
	Genes with high-CpG-density promoters (HCP) bearing the H3K27 tri-methylation (H3K27me3) mark in neural precursor cells (NPC).	32	1.85340e-4	1.94838e-2	3.5803	12	2.02%	18	9.13801e-4	4.9413	12	77	2.11%
	Genes with high-CpG-density promoters (HCP) without H3 methylation marks at either H3K4 or H3K27 in MCV8.1 cells (induced pluripotent cells, iPS).	33	2.07155e-4	2.11173e-2	3.7978	11	1.85%	24	3.49258e-3	4.5891	11	76	1.93%
	Top genes down-regulated in metastatic (T24T) vs non-metastatic (T24) bladder cancer cell lines.	35	2.34452e-4	2.25342e-2	7.1428	6	1.01%	31	3.23751e-2	6.3413	6	30	1.05%
	Unmethylated germline-specific genes with high-CpG-density promoters (HCP) in sperm.	36	2.40003e-4	2.24270e-2	7.1113	6	1.01%	28	1.54703e-2	7.3169	6	26	1.05%
InterPro	Cadherin, N-terminal	1	2.78521e-37	2.62423e-33	15.7096	44	7.39%	1	6.02200e-19	13.0852	26	63	4.57%
	Cadherin conserved site	2	1.96395e-21	9.25216e-18	5.5257	49	8.24%	2	7.07213e-18	9.1009	31	108	5.45%
	Cadherin	3	7.49981e-21	2.35544e-17	5.3472	49	8.24%	3	2.79226e-17	8.6219	31	114	5.45%
	Cadherin-like	4	8.70149e-21	2.04964e-17	5.3277	49	8.24%	4	4.87336e-17	8.4009	31	117	5.45%
	Homeodomain, metazoa	5	6.43734e-11	1.21305e-7	7.6763	18	3.03%	6	9.41617e-8	6.5481	19	92	3.34%
	Homeobox domain	6	1.41124e-6	2.21612e-3	2.7102	30	5.04%	5	7.08474e-8	4.0449	31	243	5.45%
	Homeobox, conserved site	7	1.82807e-6	2.46059e-3	3.0908	24	4.03%	8	1.47576e-6	4.2163	25	188	4.39%
	Transcription factor, fork head	8	5.71667e-6	6.73281e-3	4.7513	13	2.18%	9	3.39578e-6	8.2437	13	50	2.28%
	Homeodomain-like	9	1.19478e-5	1.25080e-2	2.3080	33	5.55%	7	1.50947e-6	3.2967	34	327	5.98%
	Claudin, conserved site	10	1.23900e-5	1.16739e-2	12.2447	6	1.01%	13	4.43520e-2	8.2713	6	23	1.05%
	Transcription factor, fork head, conserved site	13	2.52572e-5	1.83056e-2	4.4348	12	2.02%	10	2.00897e-5	7.9266	12	48	2.11%
HGNC Gene Families	HOXL	1	1.91092e-8	9.13418e-6	14.6193	9	1.51%	2	1.03140e-3	6.0974	10	52	1.76%
	FOX	3	4.35079e-5	6.93225e-3	4.5484	11	1.85%	1	3.06729e-5	8.1110	11	43	1.93%
	NKL	4	5.95582e-5	7.11720e-3	5.3972	9	1.51%	3	2.58234e-3	5.9450	9	48	1.58%
	CLDN	5	1.35504e-4	1.29542e-2	10.5026	5	0.84%	5	3.92101e-2	7.5492	5	21	0.88%
MSigDB Oncogenic Signatures	Genes up-regulated in myometrial cells over-expressing ATF2 [Gene ID=1386] gene.	2	8.39930e-5	7.85334e-3	2.9913	17	2.86%	1	1.23877e-2	2.9616	17	182	2.99%
	Genes up-regulated in Sez-4 cells (T lymphocyte) that were first starved of IL2 [Gene ID=3558] and then stimulated with IL21 [Gene ID=59067].	3	2.09270e-4	1.30445e-2	2.9995	15	2.52%	3	3.73208e-2	2.6422	15	180	2.64%
The test set of 595 genomic regions picked 569 genes (3%) of all 18,041 genes.
GO Molecular Function has 3,688 terms covering 15,090 (84%) of all 18,041 genes.	3,688 ontology terms were tested (100%) using an annotation count range of [1, Inf].
GO Biological Process has 10,440 terms covering 15,441 (86%) of all 18,041 genes.	10,440 ontology terms were tested (100%) using an annotation count range of [1, Inf].
MSigDB Cancer Neighborhood has 427 terms covering 4,758 (26%) of all 18,041 genes.	427 ontology terms were tested (100%) using an annotation count range of [1, Inf].
PANTHER Pathway has 152 terms covering 2,197 (12%) of all 18,041 genes.	152 ontology terms were tested (100%) using an annotation count range of [1, Inf].
MSigDB Perturbation has 3,364 terms covering 17,091 (95%) of all 18,041 genes.	3,364 ontology terms were tested (100%) using an annotation count range of [1, Inf].
InterPro has 9,422 terms covering 17,343 (96%) of all 18,041 genes.	9,422 ontology terms were tested (100%) using an annotation count range of [1, Inf].
HGNC Gene Families has 478 terms covering 7,310 (41%) of all 18,041 genes.	478 ontology terms were tested (100%) using an annotation count range of [1, Inf].
MSigDB Oncogenic Signatures has 187 terms covering 10,315 (57%) of all 18,041 genes.	187 ontology terms were tested (100%) using an annotation count range of [1, Inf].
GREAT version 3.0.0
Species assembly: hg19
Association rule: Single nearest gene: 1000000 bp max extension, curated regulatory domains included

## Sheet: TableS6E_body_hyper
Table S6E: full results of GREAT annotation for the hypermethylated regions in the gene body category in LMS compared to NM
Ontology	# Term Name	Binom Rank	Binom Raw P-Value	Binom FDR Q-Val	Binom Fold Enrichment	Binom Observed Region Hits	Binom Region Set Coverage	Hyper Rank	Hyper FDR Q-Val	Hyper Fold Enrichment	Hyper Observed Gene Hits	Hyper Total Genes	Hyper Gene Set Coverage
GO Biological Process	negative regulation of transforming growth factor beta receptor signaling pathway	86	3.09392e-6	3.75588e-4	2.5873	31	0.97%	293	5.33999e-5	2.5215	27	66	0.92%
	negative regulation of toll-like receptor signaling pathway	88	3.29959e-6	3.91452e-4	5.4900	12	0.38%	549	5.28320e-3	3.2440	10	19	0.34%
	cellular component disassembly involved in execution phase of apoptosis	102	9.72624e-6	9.95510e-4	2.3987	32	1.00%	494	2.33556e-3	2.0304	28	85	0.96%
	regulation of toll-like receptor signaling pathway	104	1.08974e-5	1.09393e-3	3.9474	15	0.47%	694	2.51158e-2	2.3567	13	34	0.44%
	neuron fate commitment	105	1.43320e-5	1.42501e-3	2.0364	44	1.38%	104	1.04661e-12	3.6783	37	62	1.26%
	execution phase of apoptosis	107	1.50403e-5	1.46748e-3	2.2767	34	1.07%	715	2.79918e-2	1.6964	30	109	1.02%
	actin filament bundle assembly	115	2.03186e-5	1.84457e-3	3.1269	19	0.60%	425	9.87468e-4	2.8177	16	35	0.55%
	cell differentiation in spinal cord	117	2.30549e-5	2.05721e-3	2.1706	36	1.13%	124	2.95009e-11	3.8215	31	50	1.06%
	regulation of mitochondrial membrane permeability	122	3.53249e-5	3.02288e-3	4.6810	11	0.35%	782	4.66990e-2	2.6416	9	21	0.31%
	negative regulation of autophagy	141	9.45529e-5	7.00094e-3	3.6273	13	0.41%	670	1.89547e-2	2.8017	10	22	0.34%
	forebrain regionalization	155	2.03054e-4	1.36766e-2	2.6137	19	0.60%	160	1.62879e-9	5.2391	17	20	0.58%
	spinal cord association neuron differentiation	168	3.01288e-4	1.87229e-2	3.4084	12	0.38%	391	4.52617e-4	4.1091	10	15	0.34%
	cell-substrate junction assembly	175	3.43321e-4	2.04816e-2	2.7636	16	0.50%	766	4.12659e-2	2.2258	13	36	0.44%
	thyroid gland development	176	3.49906e-4	2.07558e-2	3.3510	12	0.38%	333	1.66950e-4	3.8928	12	19	0.41%
	T cell activation involved in immune response	188	5.05057e-4	2.80468e-2	2.7701	15	0.47%	454	1.32986e-3	2.9756	14	29	0.48%
	determination of heart left/right asymmetry	199	6.52915e-4	3.42534e-2	2.0213	27	0.85%	280	3.53440e-5	2.7394	24	54	0.82%
	heart trabecula morphogenesis	216	9.04047e-4	4.36956e-2	3.0011	12	0.38%	543	4.74152e-3	3.0818	11	22	0.38%
	dorsal spinal cord development	223	9.44605e-4	4.42228e-2	2.7079	14	0.44%	429	1.02871e-3	3.3620	12	22	0.41%
	cellular response to gonadotropin stimulus	227	1.07213e-3	4.93085e-2	3.1196	11	0.35%	638	1.50373e-2	3.0818	9	18	0.31%
GO Cellular Component	focal adhesion	24	1.16358e-5	6.13306e-4	2.0546	44	1.38%	17	2.35822e-3	1.8820	40	131	1.37%
	cell-substrate adherens junction	26	1.89613e-5	9.22542e-4	2.0121	44	1.38%	26	3.27268e-3	1.8263	40	135	1.37%
Mouse Phenotype	thoracic vertebral transformation	13	5.14961e-8	3.13651e-5	3.7062	25	0.78%	636	2.17862e-3	2.2828	20	54	0.68%
	absent arcus anterior	14	6.74695e-8	3.81588e-5	20.9975	7	0.22%	595	1.49164e-3	6.1636	5	5	0.17%
	absent heart	26	1.55574e-6	4.73784e-4	7.4403	10	0.31%	681	3.28897e-3	3.7930	8	13	0.27%
	abnormal rib development	27	1.66660e-6	4.88747e-4	3.5951	20	0.63%	532	7.24055e-4	2.8892	15	32	0.51%
	vertebral transformation	32	3.97218e-6	9.82868e-4	2.2436	40	1.26%	268	5.04228e-6	2.2894	39	105	1.33%
	sacral vertebral transformation	35	5.00340e-6	1.13191e-3	6.5066	10	0.31%	1005	1.83669e-2	2.7736	9	20	0.31%
	absent metanephros	45	1.43232e-5	2.52025e-3	4.7307	12	0.38%	607	1.65535e-3	4.1091	8	12	0.27%
	failure of somite differentiation	53	2.39566e-5	3.57903e-3	2.5465	26	0.82%	417	1.20911e-4	2.5072	24	59	0.82%
	abnormal thyroid gland development	57	2.55114e-5	3.54385e-3	4.8548	11	0.35%	421	1.24473e-4	4.4026	10	14	0.34%
	abnormal arcus anterior morphology	59	3.10693e-5	4.16960e-3	8.1989	7	0.22%	1294	4.85845e-2	3.4242	5	9	0.17%
	decreased caudal vertebrae number	70	5.05833e-5	5.72169e-3	3.2827	16	0.50%	676	3.17229e-3	2.7630	13	29	0.44%
	absent somites	71	5.15900e-5	5.75338e-3	2.7372	21	0.66%	508	4.83750e-4	2.6024	19	45	0.65%
	branchial arch hypoplasia	77	7.87613e-5	8.09912e-3	3.9529	12	0.38%	343	3.35097e-5	4.5200	11	15	0.38%
	decreased tympanic ring size	89	1.17404e-4	1.04450e-2	2.8234	18	0.56%	172	2.56972e-8	4.9309	16	20	0.55%
	decreased marginal zone B cell number	98	1.71906e-4	1.38893e-2	2.1727	28	0.88%	833	8.94916e-3	1.8288	27	91	0.92%
	abnormal GABAergic neuron morphology	105	2.28842e-4	1.72569e-2	2.7630	17	0.53%	551	9.64480e-4	3.0818	13	26	0.44%
	abnormal renal vein morphology	106	2.29385e-4	1.71346e-2	26.2037	3	0.09%	1142	2.95844e-2	6.1636	3	3	0.10%
	decreased renal tubule number	108	2.31719e-4	1.69885e-2	5.0847	8	0.25%	842	9.17625e-3	4.1091	6	9	0.20%
	abnormal pterygoid bone morphology	110	2.56890e-4	1.84914e-2	3.2679	13	0.41%	193	1.48093e-7	5.6895	12	13	0.41%
	abnormal sacral vertebrae morphology	111	2.57031e-4	1.83349e-2	2.1887	26	0.82%	337	3.11911e-5	2.5848	26	62	0.89%
Disease Ontology	Hodgkin's lymphoma	7	7.75086e-6	2.47474e-3	2.5585	29	0.91%	85	1.14750e-3	2.2332	25	69	0.85%
	fibroid tumor	19	1.20660e-4	1.41934e-2	2.1858	29	0.91%	133	1.27852e-2	1.9024	25	81	0.85%
	uterine corpus soft tissue neoplasm	24	1.46595e-4	1.36517e-2	2.0982	31	0.97%	117	6.73846e-3	1.9351	27	86	0.92%
	uterine fibroid	25	1.65357e-4	1.47830e-2	2.1442	29	0.91%	135	1.53694e-2	1.8792	25	82	0.85%
	herpes simplex	28	2.41024e-4	1.92389e-2	2.0948	29	0.91%	131	1.21858e-2	1.8360	28	94	0.96%
MSigDB Cancer Neighborhood	Neighborhood of AP3D1	7	5.48279e-8	3.34450e-6	2.6362	41	1.29%	1	4.12060e-2	1.8298	38	128	1.30%
MSigDB Pathway	Beta1 integrin cell surface interactions	2	7.89457e-6	5.21042e-3	2.3866	33	1.04%	2	6.42005e-5	2.7083	29	66	0.99%
	Genes involved in TGF-beta receptor signaling activates SMADs	19	3.39308e-4	2.35730e-2	3.0140	14	0.44%	33	2.54572e-2	2.8250	11	24	0.38%
	Genes involved in NCAM signaling for neurite out-growth	25	4.03091e-4	2.12832e-2	2.0887	27	0.85%	12	3.54224e-3	2.3114	24	64	0.82%
	Signaling events mediated by VEGFR1 and VEGFR2	27	4.78443e-4	2.33905e-2	2.1338	25	0.78%	30	1.59338e-2	2.0545	23	69	0.79%
	Genes involved in Downregulation of TGF-beta receptor signaling	30	5.83934e-4	2.56931e-2	2.9902	13	0.41%	36	2.84391e-2	2.9351	10	21	0.34%
	Genes involved in Signaling by TGF-beta Receptor Complex	33	7.18758e-4	2.87503e-2	2.1915	22	0.69%	65	4.57550e-2	1.9518	19	60	0.65%
	Integrin-linked kinase signaling	34	7.46992e-4	2.90009e-2	2.4085	18	0.56%	44	3.80728e-2	2.1915	16	45	0.55%
	Notch signaling pathway	43	1.03155e-3	3.16662e-2	2.4869	16	0.50%	63	4.48138e-2	2.0983	16	47	0.55%
	Genes involved in Smooth Muscle Contraction	44	1.05482e-3	3.16447e-2	3.1261	11	0.35%	55	4.42007e-2	2.6798	10	23	0.34%
	Regulation of Androgen receptor activity	48	1.24560e-3	3.42540e-2	2.0226	24	0.75%	13	3.87600e-3	2.4422	21	53	0.72%
	How does salmonella hijack a cell	55	1.61626e-3	3.87902e-2	4.2260	7	0.22%	61	4.39600e-2	3.3189	7	13	0.24%
	Telomeres, Telomerase, Cellular Aging, and Immortality	56	1.70850e-3	4.02717e-2	2.9381	11	0.35%	39	3.11027e-2	3.0818	9	18	0.31%
	NFAT and Hypertrophy of the heart (Transcription in the broken heart)	61	1.91691e-3	4.14806e-2	2.0241	22	0.69%	19	9.01798e-3	2.3259	20	53	0.68%
MGI Expression: Detected	TS19_C7 vertebral cartilage condensation	18	1.45104e-11	7.52687e-9	72.2533	7	0.22%	1527	1.07765e-2	4.4026	5	7	0.17%
	TS19_cervical vertebral cartilage condensation	19	2.36513e-11	1.16227e-8	44.3108	8	0.25%	1585	1.23961e-2	3.6982	6	10	0.20%
	TS19_T1 vertebral cartilage condensation	24	3.51995e-11	1.36941e-8	63.5566	7	0.22%	1771	2.14628e-2	3.8523	5	8	0.17%
	TS19_T2 vertebral cartilage condensation	28	6.37045e-11	2.12432e-8	58.3205	7	0.22%	2021	3.66824e-2	3.4242	5	9	0.17%
	TS19_T3 vertebral cartilage condensation	28	6.37045e-11	2.12432e-8	58.3205	7	0.22%	2021	3.66824e-2	3.4242	5	9	0.17%
	TS19_C6 vertebral cartilage condensation	64	2.99455e-8	4.36877e-6	60.4820	5	0.16%	1985	3.70026e-2	4.1091	4	6	0.14%
	TS28_brain ventricular zone	81	5.72411e-7	6.59827e-5	2.0083	61	1.91%	322	5.72256e-11	2.5878	55	131	1.88%
	TS21_tail paraxial mesenchyme	101	9.11129e-6	8.42298e-4	3.6123	17	0.53%	1169	1.96974e-3	3.0818	11	22	0.38%
	TS21_tail	108	1.58260e-5	1.36822e-3	2.1835	37	1.16%	472	8.23716e-8	3.0296	29	59	0.99%
	TS21_tail mesenchyme	110	1.61986e-5	1.37497e-3	2.7322	24	0.75%	889	2.69686e-4	2.9005	16	34	0.55%
	TS24_molar enamel organ	122	2.94032e-5	2.25031e-3	4.3898	12	0.38%	896	3.06550e-4	4.2671	9	13	0.31%
	TS26_testis	132	4.99221e-5	3.53123e-3	2.0204	39	1.22%	1109	1.38892e-3	1.8545	34	113	1.16%
	TS10_primitive streak	136	5.32290e-5	3.65441e-3	2.3774	27	0.85%	627	4.06966e-6	2.7630	26	58	0.89%
	TS14_embryo ectoderm	156	1.42544e-4	8.53160e-3	2.6894	19	0.60%	1115	1.43972e-3	2.6416	15	35	0.51%
	TS24_lower jaw molar epithelium	173	2.26193e-4	1.22079e-2	2.4527	21	0.66%	923	3.97173e-4	2.6416	18	42	0.61%
	TS23_maturing nephron parietal epithelium	176	2.42517e-4	1.28658e-2	5.0499	8	0.25%	1771	2.14628e-2	3.8523	5	8	0.17%
	TS19_forelimb bud ectoderm	186	3.17676e-4	1.59470e-2	3.1946	13	0.41%	1468	7.73701e-3	2.8017	10	22	0.34%
	TS25_collecting duct	187	3.31572e-4	1.65556e-2	2.8872	15	0.47%	1325	4.21474e-3	2.5848	13	31	0.44%
	TS23_ulna	202	4.98738e-4	2.30530e-2	2.2549	22	0.69%	1494	8.48076e-3	1.9883	20	62	0.68%
	TS12_future midbrain floor plate	203	5.04590e-4	2.32086e-2	19.9705	3	0.09%	1795	2.21951e-2	6.1636	3	3	0.10%
MSigDB Perturbation	Genes with high-CpG-density promoters (HCP) bearing the H3K27 tri-methylation (H3K27me3) mark in brain.	1	2.41834e-26	8.13531e-23	3.0502	124	3.89%	6	1.00969e-20	2.5878	110	262	3.76%
	Genes within amplicon 17q21-q25 identified in a copy number alterations study of 191 breast tumor samples.	9	1.98493e-12	7.41923e-10	2.4167	81	2.54%	201	1.44946e-2	1.4239	73	316	2.49%
	The 'MLL signature 1': genes up-regulated in pediatric AML (acute myeloid leukemia) with rearranged MLL [GeneID=4297] compared to all AML cases with the intact gene.	11	2.54793e-11	7.79202e-9	2.1809	90	2.82%	245	2.01723e-2	1.3697	82	369	2.80%
	Genes whose expression peaked at 480 min after stimulation of HeLa cells with EGF [GeneID=1950].	15	4.07729e-10	9.14399e-8	2.4545	62	1.95%	26	1.35329e-6	2.1176	56	163	1.91%
	Genes bound by ESR1 [GeneID=2099] and up-regulated by estradiol [PubChemID=5757] in MCF-7 cells (breast cancer) expressing constitutevly active form of AKT1 [GeneID=207].	25	7.33543e-9	9.87056e-7	2.0081	82	2.57%	75	5.27857e-4	1.6256	72	273	2.46%
	Genes within amplicon 7p22 identified in a copy number alterations study of 191 breast tumor samples.	30	3.59846e-8	4.03507e-6	4.8525	19	0.60%	59	2.91265e-4	3.0818	17	34	0.58%
	Genes down-regulated after knockdown of RALA or RALB [GeneiD=5898;5899], which were also differentially expressed in bladder cancer compared to normal bladder urothelium tissue.	35	9.30248e-8	8.94102e-6	4.8077	18	0.56%	53	2.08344e-4	3.5955	14	24	0.48%
	Genes down-regulated in T98G cells (glioma, express MGMT [GeneID=4255]) by carmustine [PubChem=2578] at 48 h.	36	1.02363e-7	9.56521e-6	2.3433	49	1.54%	270	2.73659e-2	1.5504	41	163	1.40%
	Genes whose reduced expression in nasopharyngeal carinoma (NPC) correlated most with the increased expression of EBNA1 [GeneID=3783774], a latent gene of Epstein-Barr virus (EBV).	45	4.19716e-7	3.13761e-5	2.5350	38	1.19%	322	4.04695e-2	1.5517	36	143	1.23%
	Genes down-regulated in reverted NIH3T3 cells (fibroblasts transformed by activated KRAS [GeneID=3845] which then reverted to normal cells upon stable over-expression of a dominant negative form of CDC25 [GeneID=5923]) vs normal fibroblasts.	47	5.21509e-7	3.73267e-5	2.1923	50	1.57%	128	3.33931e-3	1.7274	44	157	1.50%
	Cluster 9: genes up-regulated in SW260 cells (colon cancer) by sodium butyrate and TSA [PubChem=5222465;5562] with the same kinetics with which each alters the level of histone H4 acetylation.	57	3.46467e-6	2.04476e-4	2.5725	31	0.97%	111	2.16647e-3	2.1066	27	79	0.92%
	Genes up-regulated by forced expression of APC [GeneID=324] in the APC-deficient SW480 cell line (colon cancer).	58	3.53727e-6	2.05162e-4	2.8513	26	0.82%	159	6.87255e-3	2.0012	25	77	0.85%
	Genes down-regulated during pubertal mammary gland development between week 5 and 6.	59	3.87428e-6	2.20899e-4	2.0054	52	1.63%	31	4.86157e-6	2.2151	46	128	1.57%
	Genes up-regulated in normal bone marrow plasma cells (BMPC) compared to polyclonal plasmablasts (PPC) that also distinguished multiple myeloma (MM) samples by expression of levels of TACI (TNFRSF13B) [GeneID=23495].	69	1.05488e-5	5.14294e-4	2.5156	29	0.91%	176	8.93827e-3	1.9308	26	83	0.89%
	Genes down-regulated in the influenza-specific CD8+ [GeneID=925] T lymphocytes from bronchoalveolar lavage (BAL) compared to those from spleen.	92	4.72219e-5	1.72668e-3	3.4662	15	0.47%	221	1.69644e-2	2.5505	12	29	0.41%
	Oxidative stress genes down-regulated in ARPE-19 cells (retinal pigmented epithelium) in response to HNE and tBH [PubChem=5283344;6410].	103	9.99718e-5	3.26510e-3	2.2863	27	0.85%	77	5.48519e-4	2.4250	24	61	0.82%
	ECM related genes up-regulated early (within 30 min) in dermal fibroblasts after addition of TGFB1 [GeneID=7040].	109	1.50847e-4	4.65551e-3	2.2275	27	0.85%	186	9.11765e-3	2.0877	21	62	0.72%
	Genes down-regulated in C2AS12 cells (myoblast) by IGF1 [GeneID=3479] vs PDGFB [GeneID=5155].	117	1.88009e-4	5.40566e-3	2.4875	21	0.66%	66	3.86102e-4	2.7394	20	45	0.68%
	Genes from cluster 4: down-regulated in group D of tumors arising from overexpression of BCL2L1 and MYC [GeneID=598;4609] in plasma cells.	120	1.96807e-4	5.51717e-3	3.0360	15	0.47%	293	3.40953e-2	2.1573	14	40	0.48%
	Genes whose expression peaked at 120 min after stimulation of HeLa cells with EGF [GeneID=1950].	127	2.42352e-4	6.41947e-3	2.3292	23	0.72%	246	2.14545e-2	1.9319	21	67	0.72%
MSigDB Predicted Promoter Motifs	Motif GGGGAGGG matches MAZ: MYC-associated zinc finger protein (purine-binding transcription factor)	2	1.22114e-10	3.75500e-8	2.5335	62	1.95%	108	6.78424e-5	1.7754	53	184	1.81%
	Motif GGGGCGGGGC matches SP1: Sp1 transcription factor	5	2.11934e-7	2.60679e-5	2.1005	59	1.85%	265	4.43146e-3	1.4564	56	237	1.91%
	Motif ATGCCCATATATGGWNNT matches SRF: serum response factor (c-fos serum response element-binding transcription factor)	28	1.66075e-4	3.64772e-3	2.8416	17	0.53%	290	7.32932e-3	2.0126	16	49	0.55%
	Motif GATGKMRGCG (no known TF)	30	1.93881e-4	3.97455e-3	2.6235	19	0.60%	396	3.69736e-2	1.6372	17	64	0.58%
MSigDB miRNA Motifs	Targets of MicroRNA ACCAATC,MIR-509	3	3.95242e-5	2.91162e-3	2.7901	21	0.66%	101	3.15931e-2	1.8360	14	47	0.48%
InterPro	Homeodomain, metazoa	1	9.28920e-26	8.75228e-22	5.1752	65	2.04%	4	7.19172e-18	3.6848	55	92	1.88%
	Homeobox, conserved site	2	1.04129e-21	4.90553e-18	2.7891	116	3.64%	1	3.03596e-29	3.3441	102	188	3.48%
	Homeobox domain	3	4.44095e-18	1.39475e-14	2.2938	136	4.27%	2	3.26632e-29	3.0184	119	243	4.07%
	Helix-turn-helix motif	7	1.58960e-9	2.13960e-6	4.2848	26	0.82%	5	2.68548e-4	3.3317	20	37	0.68%
HGNC Gene Families	HOXL	1	5.16101e-20	2.46696e-17	9.4012	31	0.97%	2	1.22868e-7	3.3189	28	52	0.96%
	NKL	2	1.94170e-14	4.64067e-12	4.4784	40	1.26%	1	3.30731e-12	4.1091	32	48	1.09%
MSigDB Oncogenic Signatures	Genes up-regulated in MCF-7 cells (breast cancer) over-expressing a mutant K112E form of CCND1 [Gene ID=595] gene.	2	1.13970e-8	1.06561e-6	2.2578	61	1.91%	7	3.46362e-3	1.6545	51	190	1.74%
	Genes up-regulated in small intenstine in PRKCA [Gene ID=5578] knockout mice.	3	6.63890e-7	4.13825e-5	2.3071	44	1.38%	16	2.56708e-2	1.5504	41	163	1.40%
	Genes up-regulated in retina cells from CRX and NRL [Gene ID=1406, 4901] double knockout mice.	4	6.59699e-6	3.08409e-4	2.1041	44	1.38%	8	6.39332e-3	1.7479	38	134	1.30%
MSigDB Immunologic Signatures	Genes down-regulated in comparison of monocytes treated with anti-TREM1 [GeneID=54210] and 5000 ng/ml LPS (TLR4 agonist) versus monocytes treated with vehicle (control).	1	3.45207e-16	6.59346e-13	3.5296	60	1.88%	18	1.42366e-2	1.6436	52	195	1.78%
	Genes down-regulated in comparison of monocytes treated with 1 ng/ml LPS (TLR4 agonist) versus monocytes treated with vehicle.	4	4.32499e-11	2.06518e-8	2.8916	52	1.63%	129	5.13474e-2	1.4767	46	192	1.57%
	Genes up-regulated in comparison of dendritic cells (DC) stimulated with R848 at 2 h versus DCs stimulatd with R848 for 8 h.	8	1.18555e-8	2.83050e-6	2.3303	57	1.79%	17	1.40326e-2	1.6659	50	185	1.71%
	Genes up-regulated in comparison of T follicular helper (Tfh) cells versus Th2 cells.	11	4.20067e-8	7.29389e-6	2.3442	52	1.63%	55	2.71749e-2	1.5654	48	189	1.64%
	Genes down-regulated in comparison of macrophages exposed to L. donovani versus macrophages exposed to 50 worms/well B. malayi.	12	6.31149e-8	1.00458e-5	2.2518	55	1.73%	110	4.81251e-2	1.4793	48	200	1.64%
	Genes up-regulated in comparison of peripheral blood mononuclear cells (PBMC) from healthy donors versus PBMC from patients with acute E. coli infection.	13	8.54299e-8	1.25516e-5	2.4635	45	1.41%	26	1.34183e-2	1.6912	45	164	1.54%
	Genes up-regulated in comparison of control thymocytes versus thymocytes treated with dexamethasone [PubChem=5743].	14	9.41641e-8	1.28467e-5	2.1703	58	1.82%	70	2.74877e-2	1.5409	49	196	1.67%
	Genes up-regulated in IL7R [GeneID=3575] low effector CD8 T cells versus IL7R [GeneID=3575] high effector CD8 T cells.	15	1.68709e-7	2.14823e-5	2.1312	58	1.82%	7	7.81325e-3	1.7157	54	194	1.84%
	Genes up-regulated in comparison of naive CD4 [GeneID=920] T cells versus stimulated CD4 [GeneID=920] Th1 cells at 48 h.	16	2.63387e-7	3.14418e-5	2.0437	62	1.95%	4	6.11085e-3	1.7610	54	189	1.84%
	Genes up-regulated in comparison of CD4 [GeneID=920] thymocytes versus thymic stromal cells.	17	3.40328e-7	3.82369e-5	2.1861	52	1.63%	58	2.88146e-2	1.5659	47	185	1.61%
	Genes up-regulated in comparison of naive CD4 [GeneID=920] CD8 T cells versus naive B cells.	18	4.07441e-7	4.32340e-5	2.0724	58	1.82%	57	2.65243e-2	1.5568	49	194	1.67%
	Genes up-regulated in comparison of naive CD4 [GeneID=920] T cells versus stimulated CD4 [GeneID=920] Th2 cells at 12 h.	19	6.08437e-7	6.11639e-5	2.0915	55	1.73%	14	1.32403e-2	1.6721	51	188	1.74%
	Genes up-regulated in comparison of memory CD8 T cells versus effector CD8 T cells.	20	6.84201e-7	6.53412e-5	2.0995	54	1.69%	27	1.39646e-2	1.6287	51	193	1.74%
	Genes up-regulated in comparison of naive CD8 T cells versus effector CD8 T cells KLRG1 high [GeneID=10219].	22	9.73401e-7	8.45089e-5	2.0286	57	1.79%	21	1.35914e-2	1.6458	51	191	1.74%
	Genes up-regulated in comparison of CD2+ plasmacytoid dendritic cells (DC) versus CD2- cells.	27	1.89190e-6	1.33834e-4	2.0584	52	1.63%	31	1.35601e-2	1.6306	50	189	1.71%
	Genes up-regulated in comparison of naive CD4 [GeneID=920] T cells versus stimulated CD4 [GeneID=920] Th2 cells at 48 h.	29	2.15009e-6	1.41610e-4	2.0031	55	1.73%	116	4.60537e-2	1.4923	46	190	1.57%
	Genes up-regulated in comparison of untreated CD8+ dendritic cells (DC) at 4 h versus those treated with IFNG [GeneID=3458] at 4 h.	30	2.21725e-6	1.41165e-4	2.0156	54	1.69%	111	4.79383e-2	1.4856	47	195	1.61%
	Genes down-regulated in comparison of dendritic cells (DC) stimulated with poly(I:C) (TLR3 agonist) at 4 h versus those stimulated at 24 h.	33	2.80953e-6	1.62612e-4	2.0137	53	1.66%	101	3.38504e-2	1.5095	48	196	1.64%
The test set of 3,187 genomic regions picked 2,927 genes (16%) of all 18,041 genes.
GO Biological Process has 10,440 terms covering 15,441 (86%) of all 18,041 genes.	10,440 ontology terms were tested (100%) using an annotation count range of [1, Inf].
GO Cellular Component has 1,265 terms covering 16,807 (93%) of all 18,041 genes.	1,265 ontology terms were tested (100%) using an annotation count range of [1, Inf].
Mouse Phenotype has 7,918 terms covering 7,524 (42%) of all 18,041 genes.	7,918 ontology terms were tested (100%) using an annotation count range of [1, Inf].
Disease Ontology has 2,235 terms covering 7,886 (44%) of all 18,041 genes.	2,235 ontology terms were tested (100%) using an annotation count range of [1, Inf].
MSigDB Cancer Neighborhood has 427 terms covering 4,758 (26%) of all 18,041 genes.	427 ontology terms were tested (100%) using an annotation count range of [1, Inf].
MSigDB Pathway has 1,320 terms covering 8,117 (45%) of all 18,041 genes.	1,320 ontology terms were tested (100%) using an annotation count range of [1, Inf].
MGI Expression: Detected has 9,337 terms covering 11,602 (64%) of all 18,041 genes.	9,337 ontology terms were tested (100%) using an annotation count range of [1, Inf].
MSigDB Perturbation has 3,364 terms covering 17,091 (95%) of all 18,041 genes.	3,364 ontology terms were tested (100%) using an annotation count range of [1, Inf].
MSigDB Predicted Promoter Motifs has 615 terms covering 11,991 (66%) of all 18,041 genes.	615 ontology terms were tested (100%) using an annotation count range of [1, Inf].
MSigDB miRNA Motifs has 221 terms covering 7,064 (39%) of all 18,041 genes.	221 ontology terms were tested (100%) using an annotation count range of [1, Inf].
InterPro has 9,422 terms covering 17,343 (96%) of all 18,041 genes.	9,422 ontology terms were tested (100%) using an annotation count range of [1, Inf].
HGNC Gene Families has 478 terms covering 7,310 (41%) of all 18,041 genes.	478 ontology terms were tested (100%) using an annotation count range of [1, Inf].
MSigDB Oncogenic Signatures has 187 terms covering 10,315 (57%) of all 18,041 genes.	187 ontology terms were tested (100%) using an annotation count range of [1, Inf].
MSigDB Immunologic Signatures has 1,910 terms covering 16,609 (92%) of all 18,041 genes.	1,910 ontology terms were tested (100%) using an annotation count range of [1, Inf].
GREAT version 3.0.0
Species assembly: hg19
Association rule: Single nearest gene: 1000000 bp max extension, curated regulatory domains included

## Sheet: TableS6F_3'UTR_hyper
Table S6F: full results of GREAT annotation for hypermethylated regions in the 3'UTR category in LMS compared to NM
Ontology	# Term Name	Binom Rank	Binom Raw P-Value	Binom FDR Q-Val	Binom Fold Enrichment	Binom Observed Region Hits	Binom Region Set Coverage	Hyper Rank	Hyper FDR Q-Val	Hyper Fold Enrichment	Hyper Observed Gene Hits	Hyper Total Genes	Hyper Gene Set Coverage
GO Molecular Function	sequence-specific DNA binding	3	8.57329e-12	1.05394e-8	2.3176	78	12.64%	1	1.91024e-16	3.2569	76	697	12.58%
	sequence-specific DNA binding transcription factor activity	4	1.86731e-11	1.72166e-8	2.0589	96	15.56%	2	7.59638e-16	2.7154	94	1034	15.56%
	nucleic acid binding transcription factor activity	5	2.35537e-11	1.73732e-8	2.0501	96	15.56%	3	5.40574e-16	2.7128	94	1035	15.56%
	transcription regulatory region DNA binding	10	4.77976e-6	1.76278e-3	2.2210	39	6.32%	7	7.75587e-7	3.0699	37	360	6.13%
	regulatory region DNA binding	12	7.40310e-6	2.27522e-3	2.1785	39	6.32%	8	1.15368e-6	3.0113	37	367	6.13%
	transcription regulatory region sequence-specific DNA binding	14	4.37443e-5	1.15235e-2	2.6020	23	3.73%	10	7.88750e-5	3.7337	21	168	3.48%
GO Biological Process	pattern specification process	8	3.83873e-8	5.00954e-5	2.3056	52	8.43%	1	2.06976e-11	3.5928	51	424	8.44%
	embryonic organ morphogenesis	10	7.31231e-8	7.63405e-5	2.6415	39	6.32%	2	1.94725e-10	4.2670	38	266	6.29%
	regionalization	15	2.56340e-7	1.78413e-4	2.5123	39	6.32%	3	6.00761e-9	3.7834	38	300	6.29%
	neuron fate commitment	17	4.03412e-7	2.47742e-4	4.3031	18	2.92%	5	2.53899e-8	8.1899	17	62	2.81%
	embryonic organ development	39	1.26947e-5	3.39828e-3	2.0373	43	6.97%	7	4.42486e-8	3.2003	42	392	6.95%
	transcription from RNA polymerase II promoter	40	1.34945e-5	3.52205e-3	2.0740	41	6.65%	51	3.61441e-5	2.4202	41	506	6.79%
	negative regulation of neural precursor cell proliferation	41	1.45770e-5	3.71180e-3	11.8949	6	0.97%	142	6.90915e-3	9.9564	5	15	0.83%
	embryonic skeletal system development	48	3.05802e-5	6.65118e-3	2.9077	20	3.24%	40	1.71987e-5	4.5953	18	117	2.98%
	cell fate commitment	49	3.28591e-5	7.00099e-3	2.2246	32	5.19%	4	1.05246e-8	4.2670	32	224	5.30%
	mitochondrion organization	52	4.46510e-5	8.96455e-3	2.9234	19	3.08%	164	1.52071e-2	2.5001	19	227	3.15%
	regulation of apoptotic signaling pathway	54	5.99749e-5	1.15951e-2	2.9607	18	2.92%	153	1.08771e-2	2.6616	18	202	2.98%
	embryonic skeletal system morphogenesis	57	7.92168e-5	1.45092e-2	3.2856	15	2.43%	85	1.54004e-4	4.7519	14	88	2.32%
	nucleocytoplasmic transport	59	9.29171e-5	1.64416e-2	2.8578	18	2.92%	183	2.19659e-2	2.4776	18	217	2.98%
	skeletal muscle organ development	60	9.75857e-5	1.69799e-2	2.9545	17	2.76%	114	1.90544e-3	3.5559	15	126	2.48%
	apoptotic mitochondrial changes	62	1.05441e-4	1.77550e-2	5.6971	8	1.30%	157	1.34431e-2	4.8766	8	49	1.32%
	cell differentiation in spinal cord	69	1.25822e-4	1.90374e-2	3.7372	12	1.94%	43	1.63689e-5	7.1686	12	50	1.99%
	regulation of histone deacetylation	71	1.29897e-4	1.91003e-2	7.9799	6	0.97%	198	2.84209e-2	7.1117	5	21	0.83%
	skeletal muscle tissue development	72	1.40975e-4	2.04414e-2	2.9795	16	2.59%	125	3.71711e-3	3.5140	14	119	2.32%
	regulation of intrinsic apoptotic signaling pathway	73	1.43648e-4	2.05437e-2	4.7969	9	1.46%	209	3.95296e-2	3.6327	9	74	1.49%
	nuclear transport	75	1.54662e-4	2.15290e-2	2.7405	18	2.92%	193	2.73573e-2	2.4218	18	222	2.98%
GO Cellular Component	transcription factor complex	10	2.90777e-5	3.67833e-3	2.3515	29	4.70%	2	1.09861e-4	2.9767	29	291	4.80%
Disease Ontology	granulosa cell tumor	1	2.02696e-7	4.53025e-4	84.1666	4	0.65%	2	4.17339e-2	29.8692	3	3	0.50%
MGI Expression: Detected	TS28_head	4	3.63710e-8	8.48991e-5	2.0750	65	10.53%	2	3.24978e-14	3.4401	63	547	10.43%
	TS28_dorsal root ganglion	6	6.32438e-7	9.84179e-4	2.3886	40	6.48%	30	3.37942e-10	3.7577	39	310	6.46%
	TS28_cranial ganglion	13	1.94064e-6	1.39383e-3	2.0927	48	7.78%	47	1.02579e-8	2.9126	47	482	7.78%
	TS13_lateral plate mesenchyme	14	2.76460e-6	1.84379e-3	4.4073	15	2.43%	103	2.18956e-6	6.4334	14	65	2.32%
	TS21_olfactory lobe	17	3.46164e-6	1.90125e-3	2.2816	38	6.16%	52	3.79231e-8	3.2892	37	336	6.13%
	TS19_limb mesenchyme	20	4.98586e-6	2.32765e-3	2.0019	49	7.94%	77	2.70708e-7	2.5694	48	558	7.95%
	TS28_peripheral nervous system	30	1.46632e-5	4.56367e-3	2.0248	43	6.97%	43	6.99067e-9	3.1921	42	393	6.95%
	TS13_trunk mesenchyme	31	1.47499e-5	4.44257e-3	2.6565	25	4.05%	68	2.05805e-7	4.1717	25	179	4.14%
	TS15_1st branchial arch	35	1.96675e-5	5.24673e-3	2.0843	39	6.32%	57	4.48127e-8	3.1973	38	355	6.29%
	TS17_limb mesenchyme	36	2.24398e-5	5.82001e-3	2.0277	41	6.65%	87	8.03581e-7	2.7529	40	434	6.62%
	TS12_embryo ectoderm	40	2.98004e-5	6.95616e-3	2.2036	33	5.35%	33	3.67688e-10	4.4456	32	215	5.30%
	TS21_optic chiasma	42	3.67145e-5	8.16199e-3	13.9007	5	0.81%	260	6.35093e-4	19.9128	4	6	0.66%
	TS15_optic stalk	54	8.32604e-5	1.43963e-2	6.9713	7	1.13%	246	4.70666e-4	10.5421	6	17	0.99%
	TS12_future prosencephalon	59	1.10996e-4	1.75657e-2	3.0438	16	2.59%	63	9.47013e-8	7.5939	15	59	2.48%
	TS18_venous system	62	1.26924e-4	1.91144e-2	16.1736	4	0.65%	407	8.14501e-3	17.9215	3	5	0.50%
	TS20_ureteric tip	65	1.67504e-4	2.40613e-2	4.2425	10	1.62%	327	2.64025e-3	4.8004	9	56	1.49%
	TS17_diencephalon	69	2.00278e-4	2.71014e-2	2.0682	30	4.86%	56	3.93573e-8	3.8624	30	232	4.97%
	TS21_optic stalk	73	2.39346e-4	3.06133e-2	7.1159	6	0.97%	344	3.60825e-3	9.3341	5	16	0.83%
	TS13_trophoblast giant cells	78	3.08158e-4	3.68881e-2	12.7911	4	0.65%	433	1.07129e-2	9.9564	4	12	0.66%
	TS12_neural ectoderm	82	3.33898e-4	3.80196e-2	2.0333	29	4.70%	49	2.78966e-8	4.1817	28	200	4.64%
MSigDB Perturbation	Genes with high-CpG-density promoters (HCP) bearing the H3K27 tri-methylation (H3K27me3) mark in brain.	1	2.59557e-20	8.73150e-17	5.7177	45	7.29%	2	1.05235e-15	5.0162	44	262	7.28%
	Genes up-regulated in fibroblasts expressing mutant forms of ERCC3 [GeneID=2071] after UV irradiation.	2	1.43041e-11	2.40595e-8	5.2996	26	4.21%	12	9.92497e-3	2.4563	25	304	4.14%
	Genes up-regulated in ITNK cells (T-lymphocyte progenitors (DN3 cells) reprogrammed to natural killer (NK) cells by ablation of BCL11B [GeneID=64919] gene), compared to the parental DN3 cells.	8	1.35746e-6	5.70813e-4	3.1471	24	3.89%	13	1.46871e-2	2.4383	24	294	3.97%
	Genes with promoters occupied by PML-RARA fusion [GeneID=5371,5914] protein in acute promyelocytic leukemia(APL) cells NB4 and two APL primary blasts, based on Chip-seq data.	10	2.29082e-6	7.70633e-4	2.5953	31	5.02%	16	2.05069e-2	2.1184	30	423	4.97%
	Genes with high-CpG-density promoters (HCP) bearing histone H3 dimethylation mark at K4 (H3K4me2) and trimethylation mark at K27 (H3K27me3) in neural precursor cells (NPC).	21	3.25578e-5	5.21546e-3	2.1080	36	5.83%	7	2.22804e-5	2.8991	33	340	5.46%
	Genes with high-CpG-density promoters (HCP) that have no histone H3 methylation marks in neural precursor cells (NPC).	25	5.27007e-5	7.09141e-3	2.0832	35	5.67%	15	2.13018e-2	2.0110	34	505	5.63%
	Genes with high-CpG-density promoters (HCP) bearing the H3K27 tri-methylation (H3K27me3) mark in neural precursor cells (NPC).	26	6.62024e-5	8.56557e-3	3.7404	13	2.11%	10	3.01075e-3	4.6549	12	77	1.99%
	Genes selected in supervised analyses to discriminate cells expressing E2F3 [GeneID=1871] from control cells expressing GFP.	34	1.27804e-4	1.26451e-2	2.4763	22	3.57%	11	9.96316e-3	2.7272	21	230	3.48%
MSigDB Predicted Promoter Motifs	Motif KNNNKAGGGGNAA (no known TF)	2	2.68224e-4	8.24788e-2	2.3455	22	3.57%	14	3.39439e-3	2.6433	20	226	3.31%
	Motif GGGKNARNRRGGWSA matches VDR: vitamin D (1,25- dihydroxyvitamin D3) receptor	3	3.32378e-4	6.81374e-2	2.3633	21	3.40%	21	4.67108e-3	2.5796	19	220	3.15%
	Motif RGAGGKAGG matches GTF2A1: general transcription factor IIA, 1, 19/37kDa&lt;br&gt; GTF2A2: general transcription factor IIA, 2, 12kDa	7	4.23109e-4	3.71732e-2	2.3192	21	3.40%	10	2.74399e-3	2.8376	19	200	3.15%
	Motif NNNNNRTCACGTGAYNNNNN matches ARNT: aryl hydrocarbon receptor nuclear translocator	8	5.17053e-4	3.97485e-2	2.5523	17	2.76%	94	4.47212e-2	1.9996	16	239	2.65%
	Motif NSGGGGGGGGMCN (no known TF)	9	7.13697e-4	4.87693e-2	2.4031	18	2.92%	27	6.99943e-3	2.5242	18	213	2.98%
	Motif NNNNCAAGNRNN matches TITF1: thyroid transcription factor 1	10	7.51637e-4	4.62257e-2	2.0855	24	3.89%	20	4.18500e-3	2.4695	21	254	3.48%
	Motif WGARYCAGCTGYGGNCNK matches TFAP4: transcription factor AP-4 (activating enhancer binding protein 4)	11	7.60706e-4	4.25304e-2	2.0475	25	4.05%	4	6.33717e-4	2.8560	24	251	3.97%
InterPro	Homeodomain, metazoa	1	1.99769e-14	1.88223e-10	9.0476	22	3.57%	4	5.42997e-9	6.8180	21	92	3.48%
	Homeobox, conserved site	2	1.11904e-12	5.27182e-9	4.3467	35	5.67%	3	1.39426e-11	5.2430	33	188	5.46%
	Homeobox domain	3	1.52738e-12	4.79699e-9	3.6590	42	6.81%	1	5.01703e-13	4.9167	40	243	6.62%
	Homeodomain-like	4	9.39400e-12	2.21276e-8	3.1700	47	7.62%	2	3.02233e-12	4.1104	45	327	7.45%
	Myc-type, basic helix-loop-helix (bHLH) domain	5	2.90602e-7	5.47611e-4	3.9989	20	3.24%	5	2.87757e-5	4.7690	19	119	3.15%
	Helix-turn-helix motif	6	4.50040e-7	7.06714e-4	8.5125	10	1.62%	6	3.86934e-2	6.4582	8	37	1.32%
HGNC Gene Families	NKL	1	5.15561e-11	2.46438e-8	9.2529	16	2.59%	1	1.54361e-7	8.7119	14	48	2.32%
	HOXL	2	1.62839e-9	3.89185e-7	15.6645	10	1.62%	3	1.16356e-3	5.7441	10	52	1.66%
	BHLH	3	1.33647e-7	2.12944e-5	4.4104	19	3.08%	2	1.04411e-6	5.4308	18	99	2.98%
The test set of 617 genomic regions picked 604 genes (3%) of all 18,041 genes.
GO Molecular Function has 3,688 terms covering 15,090 (84%) of all 18,041 genes.	3,688 ontology terms were tested (100%) using an annotation count range of [1, Inf].
GO Biological Process has 10,440 terms covering 15,441 (86%) of all 18,041 genes.	10,440 ontology terms were tested (100%) using an annotation count range of [1, Inf].
GO Cellular Component has 1,265 terms covering 16,807 (93%) of all 18,041 genes.	1,265 ontology terms were tested (100%) using an annotation count range of [1, Inf].
Disease Ontology has 2,235 terms covering 7,886 (44%) of all 18,041 genes.	2,235 ontology terms were tested (100%) using an annotation count range of [1, Inf].
MGI Expression: Detected has 9,337 terms covering 11,602 (64%) of all 18,041 genes.	9,337 ontology terms were tested (100%) using an annotation count range of [1, Inf].
MSigDB Perturbation has 3,364 terms covering 17,091 (95%) of all 18,041 genes.	3,364 ontology terms were tested (100%) using an annotation count range of [1, Inf].
MSigDB Predicted Promoter Motifs has 615 terms covering 11,991 (66%) of all 18,041 genes.	615 ontology terms were tested (100%) using an annotation count range of [1, Inf].
InterPro has 9,422 terms covering 17,343 (96%) of all 18,041 genes.	9,422 ontology terms were tested (100%) using an annotation count range of [1, Inf].
HGNC Gene Families has 478 terms covering 7,310 (41%) of all 18,041 genes.	478 ontology terms were tested (100%) using an annotation count range of [1, Inf].
GREAT version 3.0.0
Species assembly: hg19
Association rule: Single nearest gene: 1000000 bp max extension, curated regulatory domains included

## Sheet: TableS6G_TSS1500_hypo
Table S6G: full results of GREAT annotation for hypomethylated regions in the TSS1500 category in LMS compared to NM
Ontology	# Term Name	Binom Rank	Binom Raw P-Value	Binom FDR Q-Val	Binom Fold Enrichment	Binom Observed Region Hits	Binom Region Set Coverage	Hyper Rank	Hyper FDR Q-Val	Hyper Fold Enrichment	Hyper Observed Gene Hits	Hyper Total Genes	Hyper Gene Set Coverage
GO Molecular Function	olfactory receptor activity	1	4.57421e-121	1.68697e-117	6.2292	272	4.44%	1	5.69075e-46	2.2139	253	382	4.69%
	G-protein coupled receptor activity	2	2.38622e-50	4.40018e-47	2.1180	474	7.73%	5	4.49242e-40	1.7512	428	817	7.93%
	serine-type endopeptidase activity	6	1.78049e-14	1.09441e-11	2.7456	77	1.26%	11	2.78830e-4	1.6274	74	152	1.37%
	antigen binding	7	2.34737e-13	1.23673e-10	4.4471	37	0.60%	22	1.05162e-2	1.8505	31	56	0.57%
	peptidase regulator activity	8	3.39309e-13	1.56421e-10	2.1228	115	1.88%	18	4.08722e-3	1.4635	88	201	1.63%
	chemokine receptor binding	10	6.67010e-11	2.45993e-8	3.9984	33	0.54%	33	3.07256e-2	1.7594	30	57	0.56%
	chemokine activity	11	4.22272e-10	1.41576e-7	4.0190	30	0.49%	29	2.59914e-2	1.8419	27	49	0.50%
	serine hydrolase activity	14	2.97672e-9	7.84153e-7	2.0370	84	1.37%	16	1.57925e-3	1.5281	80	175	1.48%
	serine-type peptidase activity	16	3.79608e-9	8.74997e-7	2.0355	83	1.35%	15	1.54293e-3	1.5353	79	172	1.46%
	serine-type endopeptidase inhibitor activity	23	3.11369e-8	4.99273e-6	2.3077	55	0.90%	14	1.39991e-3	1.7425	49	94	0.91%
GO Biological Process	detection of chemical stimulus involved in sensory perception of smell	1	4.57421e-121	4.77548e-117	6.2292	272	4.44%	1	1.61094e-45	2.2139	253	382	4.69%
	detection of chemical stimulus involved in sensory perception	2	7.07955e-120	3.69552e-116	5.8978	282	4.60%	2	2.52721e-44	2.1572	262	406	4.85%
	sensory perception of chemical stimulus	3	5.41207e-104	1.88340e-100	4.7140	301	4.91%	5	7.09250e-40	2.0231	279	461	5.17%
	sensory perception of smell	4	2.56658e-103	6.69878e-100	5.0047	282	4.60%	3	1.31738e-43	2.1413	262	409	4.85%
	detection of chemical stimulus	5	1.44075e-98	3.00828e-95	4.5165	298	4.86%	4	2.25053e-43	2.0902	277	443	5.13%
	detection of stimulus involved in sensory perception	6	5.37669e-92	9.35544e-89	4.3263	291	4.75%	6	1.04891e-39	2.0403	271	444	5.02%
	detection of stimulus	7	4.93984e-67	7.36742e-64	2.7967	374	6.10%	7	2.23655e-36	1.8287	343	627	6.36%
	keratinization	16	5.54269e-19	3.61660e-16	7.0455	36	0.59%	12	2.92391e-7	2.5257	34	45	0.63%
	defense response to bacterium	18	1.99983e-14	1.15990e-11	2.5543	87	1.42%	15	3.15659e-4	1.6201	79	163	1.46%
	defense response to fungus	26	3.79081e-11	1.52216e-8	7.4538	19	0.31%	16	5.66335e-4	2.6464	19	24	0.35%
	response to fungus	51	3.98303e-7	8.15349e-5	3.3176	25	0.41%	24	5.02166e-3	2.1683	24	37	0.44%
	acute-phase response	89	2.13693e-5	2.50670e-3	2.4661	28	0.46%	20	2.45200e-3	2.1728	26	40	0.48%
	chemokine-mediated signaling pathway	105	7.15244e-5	7.11157e-3	2.6048	22	0.36%	27	2.71692e-2	2.1566	20	31	0.37%
GO Cellular Component	keratin filament	1	1.12548e-56	1.42373e-53	14.4938	72	1.17%	8	5.28516e-14	2.3434	68	97	1.26%
	intermediate filament	2	1.16988e-43	7.39951e-41	4.9326	119	1.94%	7	4.91334e-15	1.9714	115	195	2.13%
	intermediate filament cytoskeleton	3	1.09436e-32	4.61454e-30	3.4348	133	2.17%	9	3.88750e-13	1.8208	128	235	2.37%
	hemoglobin complex	6	7.84645e-11	1.65429e-8	14.8111	12	0.20%	20	4.00331e-2	2.5714	10	13	0.19%
	cornified envelope	22	1.16027e-4	6.67156e-3	3.0536	16	0.26%	18	1.76076e-2	2.3399	14	20	0.26%
Disease Ontology	bacterial infectious disease	3	6.11731e-18	4.55740e-15	2.0250	181	2.95%	3	1.65410e-3	1.4031	136	324	2.52%
MSigDB Cancer Neighborhood	Neighborhood of HPN	1	1.09114e-16	4.65918e-14	3.5002	63	1.03%	4	2.37459e-2	1.4941	59	132	1.09%
	Neighborhood of HPX	2	1.22139e-16	2.60766e-14	3.4501	64	1.04%	3	1.32840e-2	1.5217	61	134	1.13%
	Neighborhood of LCAT	3	2.86070e-16	4.07173e-14	3.6520	58	0.95%	6	2.50726e-2	1.4947	55	123	1.02%
	Neighborhood of SPRR1B	8	5.22697e-8	2.78990e-6	5.6860	16	0.26%	5	2.00931e-2	2.2792	15	22	0.28%
	Neighborhood of IGFBP1	9	1.35122e-7	6.41080e-6	2.5173	42	0.69%	1	1.88966e-4	2.0892	35	56	0.65%
	Neighborhood of HPX	10	1.44085e-7	6.15243e-6	2.3686	47	0.77%	2	5.64482e-4	1.8775	41	73	0.76%
	Neighborhood of IGFBP1	26	1.57108e-4	2.58019e-3	2.3536	24	0.39%	7	2.62315e-2	1.9663	20	34	0.37%
MSigDB Pathway	Genes involved in Olfactory Signaling Pathway	1	3.66183e-111	4.83362e-108	6.7507	234	3.82%	2	1.18556e-42	2.2739	217	319	4.02%
	Olfactory transduction	2	1.10630e-102	7.30156e-100	5.2059	270	4.41%	1	9.35213e-45	2.1907	251	383	4.65%
	Graft-versus-host disease	7	1.17039e-17	2.20703e-15	5.9855	38	0.62%	5	4.05195e-7	2.6200	29	37	0.54%
	Genes involved in Defensins	8	2.37883e-16	3.92506e-14	5.4409	38	0.62%	6	7.04086e-5	2.1830	32	49	0.59%
	Genes involved in Beta defensins	10	1.31327e-12	1.73352e-10	5.1292	30	0.49%	14	7.06752e-3	2.0057	24	40	0.44%
	Genes involved in Immunoregulatory interactions between a Lymphoid and a non-Lymphoid cell	11	5.05758e-12	6.06909e-10	3.6685	41	0.67%	11	2.77412e-3	1.8632	34	61	0.63%
	Allograft rejection	15	2.55172e-9	2.24551e-7	3.9293	28	0.46%	13	5.57887e-3	2.1012	22	35	0.41%
	Type I diabetes mellitus	19	2.63346e-8	1.82956e-6	3.1850	32	0.52%	10	1.21239e-3	2.1198	26	41	0.48%
	Genes involved in Chemokine receptors bind chemokines	23	1.43413e-7	8.23068e-6	2.9492	32	0.52%	15	1.03924e-2	1.8233	30	55	0.56%
MSigDB Perturbation	List of genomically imprinted genes.	1	2.79618e-31	9.40635e-28	4.1785	100	1.63%	16	1.72059e-2	1.8130	32	59	0.59%
	Inflammatory cytokines, chemokines and their cognate receptors up-regulated in THP-1 cells (monocyte) after treatment with PSMD4 [GeneID=5710].	5	1.33464e-16	8.97946e-14	4.1443	51	0.83%	7	1.18305e-5	2.0832	43	69	0.80%
	Cluster d: genes identifying an intrinsic group in head and neck squamous cell carcinoma (HNSCC).	22	8.16777e-8	1.24893e-5	3.7404	24	0.39%	8	1.16122e-3	2.3298	23	33	0.43%
	Genes representing epithelial differentiation module in sputum during asthma exacerbations.	32	1.09056e-6	1.14645e-4	2.5084	36	0.59%	18	1.94419e-2	1.7792	33	62	0.61%
	Genes with low-CpG-density promoters (LCP) bearing the tri-methylation mark at H3K27 (H3K27me3) in MCV6 cells (embryonic fibroblasts trapped in a differentiated state).	33	1.09298e-6	1.11418e-4	3.8623	19	0.31%	17	1.70914e-2	2.2285	18	27	0.33%
	Genes up-regulated in spleen interferon-producing dendritic cells (IKDC) compared to plasmacytoid dendritic cells (PDC) and conventional dendritic cells (cDC).	45	2.11655e-5	1.58224e-3	4.9597	11	0.18%	22	3.05905e-2	2.7857	10	12	0.19%
InterPro	Olfactory receptor	1	3.80212e-121	3.58235e-117	6.2342	272	4.44%	1	6.91324e-46	2.2197	253	381	4.69%
	GPCR, rhodopsin-like, 7TM	2	1.13294e-73	5.33726e-70	2.7623	419	6.84%	2	1.49165e-44	1.8875	380	673	7.04%
	G protein-coupled receptor, rhodopsin-like	3	3.39655e-71	1.06674e-67	2.7292	413	6.74%	3	1.73532e-43	1.8794	375	667	6.95%
	High sulphur keratin-associated protein	4	9.87454e-52	2.32595e-48	27.0719	49	0.80%	4	1.83277e-11	2.6862	45	56	0.83%
	Small proline-rich protein/late cornified envelope protein	7	7.00187e-25	9.42451e-22	19.9029	26	0.42%	10	1.27613e-6	2.8652	24	28	0.44%
	DAPIN domain	8	1.11286e-20	1.31067e-17	8.6556	34	0.55%	29	1.36785e-2	2.4311	16	22	0.30%
	Peptidase S1A, chymotrypsin-type	10	3.77988e-17	3.56140e-14	3.4970	65	1.06%	11	1.28111e-6	1.9369	62	107	1.15%
	Peptidase S1	11	6.24277e-17	5.34722e-14	3.3456	68	1.11%	13	7.28739e-6	1.8414	65	118	1.20%
	Intermediate filament protein, conserved site	12	9.24541e-17	7.25919e-14	6.1618	35	0.57%	25	4.54683e-3	1.8871	35	62	0.65%
	Trypsin-like cysteine/serine peptidase domain	13	9.99390e-17	7.24327e-14	3.2783	69	1.13%	14	2.09391e-5	1.7937	66	123	1.22%
	Peptidase S1, trypsin family, active site	14	1.45152e-16	9.76873e-14	3.5210	62	1.01%	12	5.29033e-6	1.9148	59	103	1.09%
	Intermediate filament protein	15	3.50997e-16	2.20473e-13	4.9625	41	0.67%	19	1.31112e-3	1.8775	41	73	0.76%
	Late cornified envelope protein	16	2.92670e-14	1.72346e-11	20.4725	14	0.23%	24	4.56026e-3	2.7529	14	17	0.26%
	Keratin, type I	17	1.77737e-13	9.85078e-11	7.7130	23	0.38%	20	1.30095e-3	2.3298	23	33	0.43%
	Keratin-associated protein, PMG type	18	1.79524e-12	9.39711e-10	17.4002	13	0.21%	23	1.96448e-3	3.0856	12	13	0.22%
	Immunoglobulin C1-set	19	2.46252e-12	1.22115e-9	4.8352	31	0.51%	26	1.31248e-2	2.0383	25	41	0.46%
	Beta-defensin	20	3.93956e-12	1.85592e-9	6.6027	23	0.38%	37	1.99580e-2	2.1901	19	29	0.35%
	C-type lectin	24	1.58570e-10	6.22519e-8	2.6712	56	0.91%	9	1.11919e-6	2.0601	53	86	0.98%
	Chemokine interleukin-8-like domain	26	2.38446e-10	8.64090e-8	4.1203	30	0.49%	30	1.46097e-2	1.9621	27	46	0.50%
	CC chemokine, conserved site	28	3.55552e-10	1.19643e-7	6.5045	19	0.31%	28	1.40079e-2	2.3678	17	24	0.31%
TreeFam	KRTAP1-1, KRTAP1-3, KRTAP1-5, KRTAP10-1, KRTAP10-10, ...	1	1.76002e-31	1.43019e-27	32.9958	27	0.44%	1	7.38707e-5	2.6337	26	33	0.48%
	CEACAM1, CEACAM16, CEACAM21, CEACAM3, CEACAM4, ...	6	2.26430e-9	3.06662e-6	6.6211	17	0.28%	2	1.68231e-2	2.7857	15	18	0.28%
HGNC Gene Families	KRTAP	1	4.34609e-58	2.07743e-55	16.5387	69	1.13%	1	1.60453e-13	2.3877	65	91	1.20%
	OR2	2	2.75277e-30	6.57913e-28	8.9453	50	0.82%	4	1.83296e-7	2.1953	44	67	0.82%
	OR6	3	1.03131e-21	1.64321e-19	12.8938	28	0.46%	2	3.83444e-8	2.8971	26	30	0.48%
	OR51	4	4.13057e-20	4.93603e-18	19.2590	21	0.34%	6	1.66526e-6	2.9068	20	23	0.37%
	OR5	5	1.81064e-19	1.73097e-17	7.8879	34	0.55%	5	1.31586e-6	2.3471	33	47	0.61%
	OR10	7	2.44653e-18	1.67063e-16	9.0227	29	0.47%	3	2.01144e-7	2.6742	28	35	0.52%
	LCE	8	3.98176e-15	2.37910e-13	20.3170	15	0.24%	8	2.47398e-4	2.7857	15	18	0.28%
	OR52	9	1.82463e-13	9.69081e-12	10.2137	19	0.31%	9	2.21092e-3	2.3678	17	24	0.31%
	DEFB	10	1.60139e-11	7.65464e-10	5.1407	27	0.44%	12	7.15706e-3	1.9876	22	37	0.41%
	OR8	11	7.94529e-11	3.45259e-9	10.0166	15	0.24%	20	2.95030e-2	2.1728	13	20	0.24%
	KLK	12	1.77482e-10	7.06972e-9	19.9080	10	0.16%	13	7.35594e-3	2.7857	10	12	0.19%
	WFDC	14	7.98842e-9	2.72748e-7	11.2444	11	0.18%	17	1.83059e-2	2.4514	11	15	0.20%
	BPIF	15	1.13300e-8	3.61049e-7	9.4490	12	0.20%	10	3.35527e-3	2.8285	11	13	0.20%
	RNASE	16	1.96831e-8	5.88032e-7	12.0711	10	0.16%	13	7.35594e-3	2.7857	10	12	0.19%
	VSET	17	2.22113e-7	6.24530e-6	3.1576	28	0.46%	21	2.93233e-2	1.7441	24	46	0.44%
	SERPIN	19	3.53814e-7	8.90121e-6	3.2462	26	0.42%	7	1.88572e-4	2.3298	23	33	0.43%
	GIMAP	22	1.37727e-6	2.99243e-5	10.5536	8	0.13%	15	6.81388e-3	3.3428	7	7	0.13%
	CLEC	23	1.63143e-6	3.39055e-5	3.7559	19	0.31%	11	6.68440e-3	2.1171	19	30	0.35%
	OR4	24	2.05462e-5	4.09212e-4	2.3849	30	0.49%	16	9.51192e-3	1.8051	27	50	0.50%
	DEFA	27	7.89698e-5	1.39806e-3	8.7783	6	0.10%	18	1.89959e-2	3.3428	6	6	0.11%
The test set of 6,129 genomic regions picked 5,397 genes (30%) of all 18,041 genes.
GO Molecular Function has 3,688 terms covering 15,090 (84%) of all 18,041 genes.	3,688 ontology terms were tested (100%) using an annotation count range of [1, Inf].
GO Biological Process has 10,440 terms covering 15,441 (86%) of all 18,041 genes.	10,440 ontology terms were tested (100%) using an annotation count range of [1, Inf].
GO Cellular Component has 1,265 terms covering 16,807 (93%) of all 18,041 genes.	1,265 ontology terms were tested (100%) using an annotation count range of [1, Inf].
Disease Ontology has 2,235 terms covering 7,886 (44%) of all 18,041 genes.	2,235 ontology terms were tested (100%) using an annotation count range of [1, Inf].
MSigDB Cancer Neighborhood has 427 terms covering 4,758 (26%) of all 18,041 genes.	427 ontology terms were tested (100%) using an annotation count range of [1, Inf].
MSigDB Pathway has 1,320 terms covering 8,117 (45%) of all 18,041 genes.	1,320 ontology terms were tested (100%) using an annotation count range of [1, Inf].
MSigDB Perturbation has 3,364 terms covering 17,091 (95%) of all 18,041 genes.	3,364 ontology terms were tested (100%) using an annotation count range of [1, Inf].
InterPro has 9,422 terms covering 17,343 (96%) of all 18,041 genes.	9,422 ontology terms were tested (100%) using an annotation count range of [1, Inf].
TreeFam has 8,126 terms covering 13,550 (75%) of all 18,041 genes.	8,126 ontology terms were tested (100%) using an annotation count range of [1, Inf].
HGNC Gene Families has 478 terms covering 7,310 (41%) of all 18,041 genes.	478 ontology terms were tested (100%) using an annotation count range of [1, Inf].
GREAT version 3.0.0
Species assembly: hg19
Association rule: Single nearest gene: 1000000 bp max extension, curated regulatory domains included

## Sheet: TableS6H_TSS200_hypo
Table S6H: full results of GREAT annotation for hypomethylated regions in the TSS200 category in LMS compared to NM
Ontology	# Term Name	Binom Rank	Binom Raw P-Value	Binom FDR Q-Val	Binom Fold Enrichment	Binom Observed Region Hits	Binom Region Set Coverage	Hyper Rank	Hyper FDR Q-Val	Hyper Fold Enrichment	Hyper Observed Gene Hits	Hyper Total Genes	Hyper Gene Set Coverage
GO Molecular Function	olfactory receptor activity	1	9.55988e-75	3.52568e-71	8.0241	136	5.72%	1	1.32845e-26	2.8759	128	382	6.09%
	G-protein coupled receptor activity	2	3.87571e-30	7.14682e-27	2.4060	209	8.79%	2	6.98610e-21	2.0590	196	817	9.32%
	serine-type endopeptidase activity	6	5.14563e-13	3.16285e-10	3.8582	42	1.77%	8	2.16630e-4	2.2586	40	152	1.90%
	serine-type peptidase activity	7	4.48768e-10	2.36437e-7	2.9064	46	1.93%	7	1.61135e-4	2.1956	44	172	2.09%
	serine hydrolase activity	8	6.34484e-10	2.92497e-7	2.8738	46	1.93%	9	2.10978e-4	2.1580	44	175	2.09%
	peptidase inhibitor activity	11	2.06459e-7	6.92201e-5	2.4382	43	1.81%	14	9.23963e-3	1.9530	38	167	1.81%
	fucose binding	14	7.93395e-7	2.09003e-4	19.9365	6	0.25%	22	1.94220e-2	7.1523	5	6	0.24%
	endopeptidase inhibitor activity	16	2.33324e-6	5.37812e-4	2.3215	39	1.64%	19	1.58633e-2	1.9191	36	161	1.71%
	hormone activity	17	2.66579e-6	5.78319e-4	2.6539	30	1.26%	13	9.60422e-3	2.1833	29	114	1.38%
	endopeptidase regulator activity	18	4.18280e-6	8.57009e-4	2.2629	39	1.64%	25	2.32130e-2	1.8613	36	166	1.71%
	cytokine receptor activity	31	1.33703e-4	1.59063e-2	2.4286	23	0.97%	24	2.33406e-2	2.2750	22	83	1.05%
GO Biological Process	detection of chemical stimulus involved in sensory perception of smell	1	9.55988e-75	9.98051e-71	8.0241	136	5.72%	2	1.88030e-26	2.8759	128	382	6.09%
	detection of chemical stimulus involved in sensory perception	2	1.25934e-73	6.57376e-70	7.5433	140	5.88%	3	4.60730e-26	2.7905	132	406	6.28%
	sensory perception of smell	3	1.15277e-66	4.01165e-63	6.4925	142	5.97%	1	2.11363e-26	2.8120	134	409	6.37%
	sensory perception of chemical stimulus	4	1.66704e-66	4.35098e-63	6.0521	150	6.31%	4	1.33178e-25	2.6437	142	461	6.76%
	detection of chemical stimulus	5	8.85274e-61	1.84845e-57	5.6617	145	6.09%	6	5.60741e-25	2.6543	137	443	6.52%
	detection of stimulus involved in sensory perception	6	3.07699e-58	5.35396e-55	5.4771	143	6.01%	7	7.71460e-24	2.6096	135	444	6.42%
	detection of stimulus	7	5.99959e-47	8.94797e-44	3.5255	183	7.69%	5	1.94808e-25	2.3681	173	627	8.23%
	sensory perception	9	1.40892e-29	1.63435e-26	2.3939	207	8.70%	8	1.09633e-20	2.0376	198	834	9.42%
	keratinization	13	5.18880e-14	4.16700e-11	10.0840	20	0.84%	19	3.06590e-3	3.2424	17	45	0.81%
	defense response to bacterium	14	1.38171e-12	1.03036e-9	3.4794	46	1.93%	12	1.69352e-5	2.3695	45	163	2.14%
	defense response to fungus	29	8.85399e-9	3.18744e-6	11.1176	11	0.46%	25	1.27893e-2	3.9338	11	24	0.52%
	leukocyte chemotaxis	78	1.01457e-4	1.35796e-2	2.2824	27	1.13%	20	3.13802e-3	2.5073	26	89	1.24%
GO Cellular Component	keratin filament	1	1.63357e-39	2.06646e-36	21.2632	41	1.72%	9	4.28473e-10	3.3623	38	97	1.81%
	intermediate filament	2	6.22309e-39	3.93610e-36	7.6888	72	3.03%	6	2.65425e-15	2.9930	68	195	3.24%
	intermediate filament cytoskeleton	3	3.39466e-27	1.43142e-24	4.8570	73	3.07%	8	2.20673e-11	2.5200	69	235	3.28%
Mouse Phenotype	abnormal epigenetic regulation of gene expression	4	4.32800e-17	8.56728e-14	4.4898	48	2.02%	3	2.87435e-2	2.6595	22	71	1.05%
Human Phenotype	X-linked inheritance	3	3.29628e-28	6.75298e-25	3.2889	119	5.00%	1	3.54211e-35	4.2047	97	198	4.61%
	Gonosomal inheritance	11	1.10450e-25	6.17111e-23	3.0670	119	5.00%	2	4.49449e-34	4.0810	97	204	4.61%
	X-linked recessive inheritance	27	6.56019e-20	1.49329e-17	3.7274	70	2.94%	3	3.85151e-24	4.6887	59	108	2.81%
	X-linked dominant inheritance	77	1.36889e-10	1.09263e-8	3.7781	34	1.43%	4	3.75944e-7	3.7377	27	62	1.28%
Disease Ontology	Angelman syndrome	1	2.35662e-24	5.26705e-21	18.8915	26	1.09%	58	3.40188e-2	5.3642	5	8	0.24%
	Mycobacterium infectious disease	4	1.15786e-14	6.46955e-12	3.1352	63	2.65%	15	6.89293e-3	1.9299	38	169	1.81%
	primary Actinomycetales infectious disease	5	2.18299e-14	9.75795e-12	3.0899	63	2.65%	24	9.49982e-3	1.8637	38	175	1.81%
	bacterial infectious disease	8	1.55220e-12	4.33647e-10	2.3923	83	3.49%	50	2.48956e-2	1.5364	58	324	2.76%
	parasitic infectious disease	16	1.39415e-7	1.94745e-5	2.5746	40	1.68%	10	1.45067e-3	2.1171	37	150	1.76%
	parasitic protozoa infectious disease	22	2.37549e-6	2.41328e-4	2.4509	35	1.47%	13	3.42383e-3	2.1457	32	128	1.52%
	psoriasis	23	3.26327e-6	3.17105e-4	2.1017	47	1.98%	28	1.02029e-2	1.7845	42	202	2.00%
	upper respiratory tract disease	25	8.50297e-6	7.60166e-4	2.0600	45	1.89%	52	2.86856e-2	1.6677	41	211	1.95%
	Apicomplexa infectious disease	28	3.23169e-5	2.57958e-3	2.4026	28	1.18%	27	9.54054e-3	2.1457	26	104	1.24%
	malaria	29	3.45199e-5	2.66041e-3	2.4882	26	1.09%	36	1.28912e-2	2.1457	24	96	1.14%
	Wegener's granulomatosis	34	5.94582e-5	3.90850e-3	6.2165	8	0.34%	55	3.13899e-2	3.6138	8	19	0.38%
	pneumoconiosis	36	7.85392e-5	4.87597e-3	3.4837	14	0.59%	31	1.04761e-2	3.2185	12	32	0.57%
	vasculitis	37	8.98543e-5	5.42769e-3	2.1267	32	1.35%	35	1.25851e-2	1.9421	31	137	1.47%
	allergic rhinitis	38	1.03986e-4	6.11600e-3	2.2789	27	1.13%	42	1.54423e-2	2.1019	24	98	1.14%
	rhinitis	41	1.22585e-4	6.68239e-3	2.2554	27	1.13%	47	1.90382e-2	2.0599	24	100	1.14%
	nose disease	43	1.47450e-4	7.66398e-3	2.1920	28	1.18%	48	2.20277e-2	2.0053	25	107	1.19%
	periodontitis	51	2.60017e-4	1.13949e-2	2.0833	29	1.22%	57	3.25208e-2	1.9073	26	117	1.24%
	mucocutaneous lymph node syndrome	55	4.53703e-4	1.84368e-2	2.5976	17	0.71%	46	1.83778e-2	2.4968	16	55	0.76%
	spondyloarthropathy	64	8.07122e-4	2.81862e-2	2.1703	22	0.92%	73	4.47915e-2	2.1163	18	73	0.86%
	leishmaniasis	70	9.32763e-4	2.97818e-2	3.1740	11	0.46%	16	6.58203e-3	4.0870	10	21	0.48%
MSigDB Pathway	Genes involved in Olfactory Signaling Pathway	1	7.00797e-73	9.25051e-70	9.0675	122	5.13%	2	5.60597e-27	3.0672	114	319	5.42%
	Olfactory transduction	2	9.69689e-67	6.39995e-64	6.8053	137	5.76%	1	1.57385e-27	2.8908	129	383	6.14%
	Genes involved in GPCR downstream signaling	3	7.15470e-29	3.14807e-26	2.3876	203	8.53%	3	7.03896e-22	2.0912	192	788	9.13%
	Genes involved in Signaling by GPCR	4	3.55287e-26	1.17245e-23	2.1717	222	9.33%	4	4.94328e-21	1.9880	208	898	9.90%
	Genes involved in Defensins	7	1.01503e-10	1.91405e-8	7.0087	19	0.80%	6	1.04243e-3	3.1529	18	49	0.86%
	Genes involved in Beta defensins	8	3.59444e-10	5.93083e-8	7.4882	17	0.71%	5	1.15870e-3	3.4331	16	40	0.76%
	Graft-versus-host disease	9	1.20945e-9	1.77386e-7	6.8986	17	0.71%	7	1.35294e-3	3.4795	15	37	0.71%
	Genes involved in Immunoregulatory interactions between a Lymphoid and a non-Lymphoid cell	10	3.57797e-8	4.72292e-6	4.6104	20	0.84%	10	5.19659e-3	2.6733	19	61	0.90%
	Allograft rejection	12	2.39110e-7	2.63021e-5	5.4230	15	0.63%	8	2.87127e-3	3.4331	14	35	0.67%
	Genes involved in Chemokine receptors bind chemokines	24	8.92753e-6	4.91014e-4	3.7990	16	0.67%	14	3.56632e-2	2.4968	16	55	0.76%
MSigDB Perturbation	Genes up-regulated in NB4 cells (acute promyelocytic leukemia, APL) in response to tretinoin [PubChem=444795]; based on Chip-seq data.	2	5.78637e-23	9.73267e-20	2.2969	173	7.27%	3	6.71048e-10	1.7473	159	781	7.56%
	Inflammatory cytokines, chemokines and their cognate receptors up-regulated in THP-1 cells (monocyte) after treatment with PSMD4 [GeneID=5710].	11	3.09429e-10	9.46289e-8	5.0244	24	1.01%	6	9.53160e-4	2.8609	23	69	1.09%
	Top 200 genes with high histone H3 trimethylation mark at K27 (H3K27me3) in PC3 cells (prostate cancer), by ChIP-chip assay on an 88K microarray (all promoters).	16	1.10214e-8	2.31724e-6	2.1192	70	2.94%	1	1.19296e-9	2.6935	59	188	2.81%
	Genes with low-CpG-density promoters (LCP) bearing the tri-methylation mark at H3K27 (H3K27me3) in MCV6 cells (embryonic fibroblasts trapped in a differentiated state).	19	1.20490e-7	2.13330e-5	6.8081	13	0.55%	8	1.21716e-3	4.1324	13	27	0.62%
	Cluster d: genes identifying an intrinsic group in head and neck squamous cell carcinoma (HNSCC).	21	3.91475e-7	6.27106e-5	5.6212	14	0.59%	10	2.59038e-3	3.6412	14	33	0.67%
	Liver selective genes	23	6.85814e-7	1.00308e-4	2.0799	55	2.31%	15	4.97973e-3	1.7939	51	244	2.43%
	Genes up-regulated at 3 months of age in lungs from LIPA [GeneID=3988] knockout mice, which display pulmonary pathology.	25	3.83260e-6	5.15715e-4	3.5299	19	0.80%	11	3.05490e-3	2.9120	19	56	0.90%
	Cluster e: genes identifying an intrinsic group in head and neck squamous cell carcinoma (HNSCC).	27	8.55428e-6	1.06580e-3	2.5927	28	1.18%	9	1.45040e-3	2.6167	25	82	1.19%
	Unmethylated germline-specific genes with intermediate-CpG-density promoters (ICP) in sperm.	31	2.77959e-5	3.01631e-3	4.4138	12	0.50%	12	2.82633e-3	5.1497	9	15	0.43%
	Genes up-regulated in colorectal adenoma compared to normal mucosa samples.	32	2.93218e-5	3.08245e-3	2.0932	38	1.60%	16	4.95479e-3	2.1291	32	129	1.52%
	Genes up-regulated at 6 months of age in lungs from LIPA [GeneID=3988] knockout mice, which display pulmonary pathology.	37	5.82674e-5	5.29761e-3	2.6384	22	0.92%	13	2.81811e-3	2.6595	22	71	1.05%
	Genes with unmethylated DNA in lung cancer samples.	43	1.15973e-4	9.07283e-3	3.1897	15	0.63%	5	1.77398e-4	4.2914	15	30	0.71%
	Cluster c: genes identifying an intrinsic group in head and neck squamous cell carcinoma (HNSCC).	45	1.29882e-4	9.70941e-3	2.0076	35	1.47%	17	5.95361e-3	2.1637	30	119	1.43%
	Germline-specific genes with intermediate-CpG-density promoters (ICP) that are methylated in primary fibroblasts.	47	1.67432e-4	1.19839e-2	3.2347	14	0.59%	14	4.45481e-3	4.1048	11	23	0.52%
	Genes with high-CpG-density promoters (HCP) without H3 methylation marks at K4 and K27 in embryonic stem cells (ES).	48	1.80087e-4	1.26211e-2	2.3779	23	0.97%	22	7.74023e-3	2.6302	19	62	0.90%
	Genes specifically up-regulated in pediatric acute lymphoblastic leukemia (ALL) patients by high-dose methotrexate (HDMTX) [PubChem=4112].	56	4.54830e-4	2.73223e-2	3.7464	10	0.42%	21	7.54812e-3	4.0870	10	21	0.48%
InterPro	Olfactory receptor	1	8.68115e-75	8.17938e-71	8.0306	136	5.72%	1	2.53735e-26	2.8835	128	381	6.09%
	G protein-coupled receptor, rhodopsin-like	2	4.54983e-43	2.14342e-39	3.2177	189	7.94%	2	1.55702e-23	2.2776	177	667	8.42%
	GPCR, rhodopsin-like, 7TM	3	2.12882e-42	6.68592e-39	3.1931	188	7.90%	3	9.31657e-23	2.2445	176	673	8.37%
	High sulphur keratin-associated protein	6	1.53914e-28	2.41696e-25	34.1609	24	1.01%	14	7.16991e-5	3.3718	22	56	1.05%
	Peptidase S1A, chymotrypsin-type	7	3.22360e-18	4.33896e-15	5.6828	41	1.72%	7	2.96163e-8	3.1283	39	107	1.86%
	Trypsin-like cysteine/serine peptidase domain	8	7.49927e-18	8.83227e-15	5.2634	43	1.81%	11	1.48149e-7	2.8609	41	123	1.95%
	Peptidase S1	9	1.21535e-17	1.27233e-14	5.3236	42	1.77%	10	1.51989e-7	2.9094	40	118	1.90%
	Peptidase S1, trypsin family, active site	10	1.83930e-17	1.73299e-14	5.7061	39	1.64%	9	1.21784e-7	3.0831	37	103	1.76%
	DAPIN domain	11	4.15324e-16	3.55744e-13	13.1172	20	0.84%	17	7.06078e-4	4.6815	12	22	0.57%
	Small proline-rich protein/late cornified envelope protein	12	5.12488e-16	4.02388e-13	27.6100	14	0.59%	32	4.97853e-2	3.3718	11	28	0.52%
	Intermediate filament protein	13	1.47511e-15	1.06911e-12	8.1074	26	1.09%	16	1.99812e-4	2.9393	25	73	1.19%
	NACHT nucleoside triphosphatase	14	6.04634e-15	4.06919e-12	13.6670	18	0.76%	28	2.60372e-2	3.9013	10	22	0.48%
	Intermediate filament protein, conserved site	15	3.62713e-14	2.27832e-11	9.5248	21	0.88%	18	1.86351e-3	2.9071	21	62	1.00%
	Keratin-associated protein, PMG type	16	8.75096e-13	5.15322e-10	34.4831	10	0.42%	13	6.71399e-5	6.6021	10	13	0.48%
	Immunoglobulin V-set domain	17	6.83933e-12	3.79060e-9	2.8651	57	2.40%	8	3.95932e-8	2.6369	51	166	2.43%
	Transcription elongation factor A-like/Brain expressed X-linked-like	18	1.31493e-11	6.88292e-9	20.8788	11	0.46%	12	1.07098e-5	6.7436	11	14	0.52%
	Keratin, type I	20	2.92927e-11	1.37998e-8	12.0953	14	0.59%	20	3.62762e-3	3.6412	14	33	0.67%
	Transcription elongation factor A, SII-related	22	7.50860e-10	3.21573e-7	28.4318	8	0.34%	15	1.70153e-4	7.6291	8	9	0.38%
	Beta-defensin	23	2.25922e-9	9.25494e-7	9.6147	13	0.55%	26	1.69120e-2	3.5515	12	29	0.57%
	Proteinase inhibitor I25, cystatin	27	3.79844e-8	1.32551e-5	11.2291	10	0.42%	27	2.46181e-2	4.2914	9	18	0.43%
TreeFam	KIR2DL1, KIR2DL3, KIR2DL4, KIR3DL1, KIR3DL2, ...	2	1.46935e-11	5.96996e-8	47.0655	8	0.34%	3	4.24398e-2	7.3567	6	7	0.29%
	CD33, MAG, SIGLEC10, SIGLEC11, SIGLEC14, ...	4	3.62682e-11	7.36788e-8	30.4106	9	0.38%	1	6.82221e-2	6.6755	7	9	0.33%
	KRTAP11-1, KRTAP13-1, KRTAP13-2, KRTAP13-3, KRTAP13-4, ...	5	7.11614e-9	1.15652e-5	29.2874	7	0.29%	1	6.82221e-2	6.6755	7	9	0.33%
	TCEAL1, TCEAL2, TCEAL3, TCEAL4, TCEAL5, ...	6	2.32388e-7	3.14731e-4	24.6650	6	0.25%	3	4.24398e-2	7.3567	6	7	0.29%
HGNC Gene Families	KRTAP	1	6.49059e-44	3.10250e-41	25.9356	42	1.77%	1	2.36143e-11	3.6783	39	91	1.86%
	OR2	2	1.52840e-19	3.65288e-17	11.9838	26	1.09%	2	1.17625e-5	3.2025	25	67	1.19%
	NLR	3	1.48221e-15	2.36165e-13	14.8588	18	0.76%	6	2.19555e-3	4.2914	10	20	0.48%
	LCE	4	7.79528e-13	9.31536e-11	34.8950	10	0.42%	8	4.21515e-3	4.2914	9	18	0.43%
	OR51	5	3.40220e-11	3.25251e-9	23.6271	10	0.42%	16	2.05662e-2	3.3585	9	23	0.43%
	OR8	6	3.68995e-11	2.93966e-9	18.9241	11	0.46%	11	8.51610e-3	3.8622	9	20	0.43%
	OR52	7	3.52887e-10	2.40971e-8	15.2341	11	0.46%	7	2.09131e-3	3.9338	11	24	0.52%
	DEFB	8	6.05149e-10	3.61577e-8	7.8483	16	0.67%	3	1.14316e-3	3.4795	15	37	0.71%
	OR10	9	8.73690e-10	4.64027e-8	10.4203	13	0.55%	9	4.60133e-3	3.1879	13	35	0.62%
	OR1	10	1.10652e-9	5.28918e-8	13.6352	11	0.46%	14	1.39871e-2	3.3011	10	26	0.48%
	IL	11	1.52605e-8	6.63138e-7	5.4322	18	0.76%	10	8.87163e-3	2.7392	15	47	0.71%
	OR6	12	2.28810e-8	9.11426e-7	11.8636	10	0.42%	18	3.97516e-2	2.8609	10	30	0.48%
	OR5	13	2.68409e-8	9.86920e-7	7.7700	13	0.55%	23	4.50107e-2	2.3740	13	47	0.62%
	BPIF	14	5.52877e-8	1.88768e-6	16.2289	8	0.34%	5	2.39904e-3	5.2817	8	13	0.38%
	OR7	15	3.93749e-7	1.25475e-5	22.5156	6	0.25%	15	2.17128e-2	4.6815	6	11	0.29%
	VSET	16	7.19048e-7	2.14816e-5	4.6485	16	0.67%	21	3.98453e-2	2.4256	13	46	0.62%
	SCGB	17	1.13690e-6	3.19670e-5	13.7180	7	0.29%	12	1.36876e-2	5.1497	6	10	0.29%
	PRSS	19	2.21076e-6	5.56181e-5	4.8379	14	0.59%	4	1.47278e-3	3.7192	13	30	0.62%
	OR3	20	3.32026e-6	7.93541e-5	41.5046	4	0.17%	20	3.77543e-2	8.5828	3	3	0.14%
	GIMAP	21	1.43408e-5	3.26423e-4	16.9932	5	0.21%	13	1.34698e-2	6.1306	5	7	0.24%
MSigDB Oncogenic Signatures	Genes down-regulated in Sez-4 cells (T lymphocyte) that were first starved of IL2 [Gene ID=3558] and then stimulated with IL15 [Gene ID=3600].	1	2.65433e-8	4.96360e-6	2.2519	58	2.44%	11	2.50847e-2	1.6612	36	186	1.71%
The test set of 2,379 genomic regions picked 2,102 genes (12%) of all 18,041 genes.
GO Molecular Function has 3,688 terms covering 15,090 (84%) of all 18,041 genes.	3,688 ontology terms were tested (100%) using an annotation count range of [1, Inf].
GO Biological Process has 10,440 terms covering 15,441 (86%) of all 18,041 genes.	10,440 ontology terms were tested (100%) using an annotation count range of [1, Inf].
GO Cellular Component has 1,265 terms covering 16,807 (93%) of all 18,041 genes.	1,265 ontology terms were tested (100%) using an annotation count range of [1, Inf].
Mouse Phenotype has 7,918 terms covering 7,524 (42%) of all 18,041 genes.	7,918 ontology terms were tested (100%) using an annotation count range of [1, Inf].
Human Phenotype has 6,146 terms covering 2,822 (16%) of all 18,041 genes.	6,146 ontology terms were tested (100%) using an annotation count range of [1, Inf].
Disease Ontology has 2,235 terms covering 7,886 (44%) of all 18,041 genes.	2,235 ontology terms were tested (100%) using an annotation count range of [1, Inf].
MSigDB Pathway has 1,320 terms covering 8,117 (45%) of all 18,041 genes.	1,320 ontology terms were tested (100%) using an annotation count range of [1, Inf].
MSigDB Perturbation has 3,364 terms covering 17,091 (95%) of all 18,041 genes.	3,364 ontology terms were tested (100%) using an annotation count range of [1, Inf].
InterPro has 9,422 terms covering 17,343 (96%) of all 18,041 genes.	9,422 ontology terms were tested (100%) using an annotation count range of [1, Inf].
TreeFam has 8,126 terms covering 13,550 (75%) of all 18,041 genes.	8,126 ontology terms were tested (100%) using an annotation count range of [1, Inf].
HGNC Gene Families has 478 terms covering 7,310 (41%) of all 18,041 genes.	478 ontology terms were tested (100%) using an annotation count range of [1, Inf].
MSigDB Oncogenic Signatures has 187 terms covering 10,315 (57%) of all 18,041 genes.	187 ontology terms were tested (100%) using an annotation count range of [1, Inf].
GREAT version 3.0.0
Species assembly: hg19
Association rule: Single nearest gene: 1000000 bp max extension, curated regulatory domains included

## Sheet: TableS6I_5'UTR_hypo
Table S6I: full results of GREAT annotation for hypomethylated regions in the 5'UTR category in LMS compared to NM
Ontology	# Term Name	Binom Rank	Binom Raw P-Value	Binom FDR Q-Val	Binom Fold Enrichment	Binom Observed Region Hits	Binom Region Set Coverage	Hyper Rank	Hyper FDR Q-Val	Hyper Fold Enrichment	Hyper Observed Gene Hits	Hyper Total Genes	Hyper Gene Set Coverage
GO Molecular Function	endoribonuclease activity, producing 3'-phosphomonoesters	1	3.23977e-8	1.19483e-4	11.4269	10	0.38%	21	2.62599e-2	3.8451	9	17	0.36%
	cytokine receptor activity	4	2.07977e-6	1.91755e-3	2.7439	29	1.09%	17	1.89733e-2	2.1876	25	83	1.01%
	peptidase inhibitor activity	7	7.48518e-6	3.94362e-3	2.1339	42	1.58%	24	4.10891e-2	1.7396	40	167	1.61%
	sodium ion transmembrane transporter activity	8	8.15472e-6	3.75933e-3	2.2238	38	1.43%	1	2.13804e-3	2.2622	38	122	1.53%
	chemokine receptor activity	9	1.06695e-5	4.37211e-3	4.8747	12	0.45%	25	5.10296e-2	3.0728	11	26	0.44%
	solute:cation symporter activity	15	4.16226e-5	1.02336e-2	2.5127	25	0.94%	10	2.06676e-2	2.2416	25	81	1.01%
	symporter activity	19	7.82857e-5	1.51957e-2	2.0169	37	1.39%	19	1.78004e-2	1.9292	34	128	1.37%
	organic acid transmembrane transporter activity	29	3.04698e-4	3.87492e-2	2.0346	30	1.13%	26	4.95794e-2	1.9610	27	100	1.09%
GO Biological Process	keratinization	1	2.49552e-19	2.60532e-15	11.7465	26	0.98%	1	5.33246e-7	4.0349	25	45	1.01%
	inflammatory response	4	3.35675e-13	8.76112e-10	2.2068	104	3.92%	2	7.00985e-6	1.8251	97	386	3.90%
	keratinocyte differentiation	6	6.43212e-9	1.11919e-5	3.2351	34	1.28%	4	1.11951e-4	2.6631	33	90	1.33%
	cellular defense response	7	1.37602e-8	2.05223e-5	4.8946	20	0.75%	45	4.13405e-2	2.3792	19	58	0.76%
	eosinophil chemotaxis	8	1.08922e-6	1.42144e-3	10.8890	8	0.30%	21	1.29051e-2	5.6489	7	9	0.28%
	eosinophil migration	9	1.36642e-6	1.58505e-3	10.5579	8	0.30%	33	2.40987e-2	5.0840	7	10	0.28%
	leukocyte chemotaxis	10	3.06217e-6	3.19690e-3	2.4997	33	1.24%	10	1.45908e-3	2.4482	30	89	1.21%
	negative regulation of dendritic cell differentiation	11	4.42205e-6	4.19693e-3	21.7323	5	0.19%	28	1.83861e-2	7.2629	5	5	0.20%
	dendritic cell migration	17	2.07643e-5	1.27517e-2	5.5028	10	0.38%	41	3.80749e-2	3.8451	9	17	0.36%
	chemokine-mediated signaling pathway	21	2.93651e-5	1.45986e-2	3.8265	14	0.53%	40	2.93830e-2	3.0457	13	31	0.52%
GO Cellular Component	cornified envelope	3	4.79300e-6	2.02105e-3	5.2869	12	0.45%	11	2.23366e-4	4.3577	12	20	0.48%
	sodium channel complex	7	1.94529e-4	3.51542e-2	4.6200	9	0.34%	19	9.95541e-3	3.8451	9	17	0.36%
Mouse Phenotype	decreased inflammatory response	4	1.50655e-9	2.98221e-6	2.3299	64	2.41%	65	1.88159e-3	1.7209	59	249	2.38%
	abnormal eosinophil physiology	5	1.54363e-9	2.44449e-6	8.0225	15	0.56%	85	4.51288e-3	3.2558	13	29	0.52%
	increased immunoglobulin level	8	1.02970e-8	1.01915e-5	2.0299	78	2.94%	8	6.25829e-5	1.8603	73	285	2.94%
	abnormal eosinophil morphology	20	3.76511e-8	1.49061e-5	2.9454	35	1.32%	56	1.29041e-3	2.1926	32	106	1.29%
	decreased acute inflammation	23	5.81091e-8	2.00047e-5	2.3872	49	1.85%	92	5.84351e-3	1.7762	45	184	1.81%
	decreased IgG level	25	6.55524e-8	2.07618e-5	2.0225	70	2.64%	11	5.83510e-5	1.9269	65	245	2.62%
	decreased IgG2a level	27	7.56760e-8	2.21927e-5	2.8593	35	1.32%	15	6.14281e-5	2.6114	32	89	1.29%
	decreased susceptibility to experimental autoimmune encephalomyelitis	31	1.36047e-7	3.47491e-5	3.0793	30	1.13%	40	4.08677e-4	2.4491	29	86	1.17%
	abnormal eosinophil cell number	36	3.78421e-7	8.32315e-5	2.8127	32	1.21%	97	6.50890e-3	2.0649	29	102	1.17%
	decreased susceptibility to autoimmune disorder	39	5.73358e-7	1.16406e-4	2.2463	47	1.77%	116	8.45345e-3	1.7463	44	183	1.77%
	increased IgE level	40	6.62118e-7	1.31066e-4	3.1312	26	0.98%	76	3.32285e-3	2.3555	24	74	0.97%
	abnormal interleukin-5 secretion	57	4.11155e-6	5.71145e-4	3.5132	19	0.72%	176	3.40733e-2	2.3241	16	50	0.64%
	decreased interleukin-5 secretion	61	8.64381e-6	1.12200e-3	4.2836	14	0.53%	129	1.47384e-2	3.0053	12	29	0.48%
	increased IgM level	62	9.77359e-6	1.24818e-3	2.2326	37	1.39%	75	3.35558e-3	2.0016	35	127	1.41%
	decreased IgM level	67	1.69698e-5	2.00548e-3	2.2309	35	1.32%	74	2.80425e-3	2.0662	33	116	1.33%
	abnormal chemokine secretion	68	1.85544e-5	2.16050e-3	3.0383	20	0.75%	78	3.31596e-3	2.6537	19	52	0.76%
	abnormal transitional stage B cell morphology	71	2.26831e-5	2.52964e-3	2.5538	26	0.98%	49	9.16964e-4	2.5218	25	72	1.01%
	abnormal monocyte morphology	73	2.94749e-5	3.19701e-3	2.0285	41	1.54%	104	6.91262e-3	1.8393	39	154	1.57%
	abnormal hypersensitivity reaction	76	3.36381e-5	3.50456e-3	2.0578	39	1.47%	160	2.50783e-2	1.7431	36	150	1.45%
	abnormal spleen marginal zone morphology	77	3.51590e-5	3.61544e-3	2.1243	36	1.36%	162	2.62754e-2	1.7531	35	145	1.41%
Human Phenotype	X-linked inheritance	1	6.14578e-17	3.77719e-13	2.5507	103	3.88%	1	5.76243e-23	3.2646	89	198	3.58%
	Gonosomal inheritance	2	4.93309e-15	1.51594e-11	2.3787	103	3.88%	2	4.05916e-22	3.1686	89	204	3.58%
	X-linked recessive inheritance	3	2.38646e-14	4.88905e-11	3.0536	64	2.41%	3	4.49153e-16	3.6314	54	108	2.17%
	X-linked dominant inheritance	5	1.81232e-5	2.22770e-2	2.5888	26	0.98%	4	5.68284e-3	2.6943	23	62	0.93%
Disease Ontology	ulcerative colitis	10	9.84263e-8	2.19983e-5	2.2988	51	1.92%	50	4.62069e-3	1.7240	47	198	1.89%
	nose disease	16	5.81783e-6	8.12679e-4	2.3850	34	1.28%	26	3.42562e-4	2.2400	33	107	1.33%
	upper respiratory tract disease	17	6.69256e-6	8.79875e-4	2.0099	49	1.85%	79	1.39038e-2	1.6178	47	211	1.89%
	allergic rhinitis	18	8.09060e-6	1.00458e-3	2.4202	32	1.21%	27	3.56610e-4	2.2974	31	98	1.25%
	rhinitis	19	9.89955e-6	1.16450e-3	2.3952	32	1.21%	30	5.11897e-4	2.2515	31	100	1.25%
	parasitic infectious disease	20	1.11848e-5	1.24991e-3	2.1916	38	1.43%	52	4.73379e-3	1.8399	38	150	1.53%
	eczematous skin disease	23	1.33976e-5	1.30190e-3	2.0807	42	1.58%	32	6.07077e-4	1.9852	41	150	1.65%
	periodontitis	24	1.39192e-5	1.29623e-3	2.2529	35	1.32%	43	1.64970e-3	2.0485	33	117	1.33%
	Crohn's disease	26	1.90406e-5	1.63676e-3	2.0486	42	1.58%	97	3.22656e-2	1.6186	39	175	1.57%
	periodontal disease	28	1.97315e-5	1.57500e-3	2.0874	40	1.51%	33	7.09707e-4	2.0513	37	131	1.49%
	autoimmune disease of gastrointestinal tract	29	2.12812e-5	1.64012e-3	2.0007	44	1.66%	129	4.80069e-2	1.5429	41	193	1.65%
	peptic ulcer	36	4.35917e-5	2.70631e-3	3.3242	16	0.60%	130	4.91298e-2	2.0751	16	56	0.64%
	parasitic protozoa infectious disease	40	5.25051e-5	2.93372e-3	2.1334	34	1.28%	49	4.18287e-3	1.9292	34	128	1.37%
	pulmonary alveolar proteinosis	43	6.85954e-5	3.56536e-3	7.2169	7	0.26%	106	3.54182e-2	3.9616	6	11	0.24%
	migraine	50	2.88712e-4	1.29054e-2	2.1346	27	1.02%	53	4.80090e-3	2.2826	22	70	0.89%
	Fabry disease	51	3.29762e-4	1.44514e-2	6.7135	6	0.23%	133	4.99026e-2	3.6314	6	12	0.24%
	hemangioma of skin	53	3.48958e-4	1.47155e-2	3.8784	10	0.38%	80	1.38196e-2	3.1578	10	23	0.40%
	sarcoidosis	57	4.74490e-4	1.86050e-2	2.3143	21	0.79%	102	3.45719e-2	1.9554	21	78	0.85%
	inborn errors carbohydrate metabolism	70	9.23972e-4	2.95011e-2	2.3620	18	0.68%	64	8.12242e-3	2.4694	17	50	0.68%
	intermediate coronary syndrome	73	9.71388e-4	2.97404e-2	3.3872	10	0.38%	67	1.06326e-2	3.3013	10	22	0.40%
MSigDB Cancer Neighborhood	Neighborhood of CEBPA	1	7.03848e-11	3.00543e-8	6.7113	20	0.75%	40	1.71628e-2	2.0751	18	63	0.72%
	Neighborhood of TST	2	7.67634e-11	1.63890e-8	4.9591	26	0.98%	53	4.84881e-2	1.6923	24	103	0.97%
	Neighborhood of SPRR1B	4	6.65313e-10	7.10222e-8	10.6648	13	0.49%	4	9.73754e-5	4.2917	13	22	0.52%
	Neighborhood of HCK	5	7.64874e-10	6.53202e-8	4.1478	28	1.05%	23	6.34215e-4	2.1867	28	93	1.13%
	Neighborhood of CYP2B6	9	2.45667e-8	1.16555e-6	6.0062	16	0.60%	54	4.91452e-2	2.0336	14	50	0.56%
	Neighborhood of CARD15	10	3.92867e-7	1.67754e-5	3.4163	24	0.90%	13	2.75555e-4	2.5262	24	69	0.97%
	Neighborhood of IGFBP1	11	9.69817e-7	3.76465e-5	4.0750	18	0.68%	1	3.08228e-5	3.8451	18	34	0.72%
	Neighborhood of CASP1	12	6.05695e-6	2.15526e-4	2.7009	27	1.02%	55	4.92803e-2	1.6658	25	109	1.01%
	Neighborhood of EGFR	13	1.73238e-5	5.69022e-4	3.5959	16	0.60%	3	8.70858e-5	3.7486	16	31	0.64%
	Neighborhood of CDKN1C	16	6.96218e-5	1.85803e-3	4.0047	12	0.45%	25	7.00663e-4	3.4862	12	25	0.48%
	Neighborhood of MMP11	17	1.18625e-4	2.97957e-3	2.9245	17	0.64%	12	2.91549e-4	3.0867	17	40	0.68%
	Neighborhood of CD33	18	1.90284e-4	4.51395e-3	2.8072	17	0.64%	38	1.36795e-2	2.2347	16	52	0.64%
	Neighborhood of CD1D	21	5.75745e-4	1.17068e-2	2.8529	14	0.53%	43	2.13422e-2	2.2596	14	45	0.56%
	Neighborhood of TIMP2	22	6.76816e-4	1.31364e-2	2.5046	17	0.64%	24	6.52853e-4	2.8061	17	44	0.68%
	Neighborhood of KISS1	23	7.14087e-4	1.32572e-2	2.4921	17	0.64%	29	1.04861e-3	2.6841	17	46	0.68%
	Neighborhood of PTPN4	24	1.23762e-3	2.20193e-2	2.5286	15	0.56%	48	3.70736e-2	2.1183	14	48	0.56%
	Neighborhood of CD14	26	1.41851e-3	2.32963e-2	3.0092	11	0.41%	52	4.70869e-2	2.2826	11	35	0.44%
MSigDB Perturbation	Genes up-regulated in NB4 cells (acute promyelocytic leukemia, APL) in response to tretinoin [PubChem=444795]; based on Chip-seq data.	1	2.97332e-17	1.00022e-13	2.0224	170	6.40%	11	4.26572e-5	1.4786	159	781	6.40%
	Genes whose expression negatively correlated with that of SMARCA2 [GeneID=6595] in prostate cancer samples.	3	1.61143e-10	1.80695e-7	2.0416	96	3.62%	6	4.32799e-6	1.8544	84	329	3.38%
	Top 200 marker genes down-regulated in the 'proliferation' subclass of hepatocellular carcinoma (HCC); characterized by increased proliferation, high levels of serum AFP [GeneID=174], and chromosomal instability.	4	2.39992e-9	2.01833e-6	2.5917	51	1.92%	23	1.93206e-3	1.8892	45	173	1.81%
	Inflammatory cytokines, chemokines and their cognate receptors up-regulated in THP-1 cells (monocyte) after treatment with PSMD4 [GeneID=5710].	5	1.17997e-8	7.93882e-6	4.3145	23	0.87%	67	3.73530e-2	2.1052	20	69	0.81%
	Genes up-regulated in pulpal tissue extracted from carious teeth.	6	2.82465e-8	1.58368e-5	2.1654	63	2.37%	14	4.04834e-5	1.9244	62	234	2.50%
	Genes up-regulated at 3 months of age in lungs from LIPA [GeneID=3988] knockout mice, which display pulmonary pathology.	8	3.80324e-7	1.59926e-4	3.6624	22	0.83%	21	1.27555e-3	2.7236	21	56	0.85%
	Genes down-regulated in liver samples of liver-specific knockout of HNF4A [GeneID=3172].	10	5.02438e-7	1.69020e-4	2.3853	42	1.58%	35	6.88734e-3	1.8924	37	142	1.49%
	Genes up-regulated in kidney biopsies from patients with acute transplant rejection compared to the biopsies from patients with well functioning kidneys more than 1-year post transplant.	12	6.73625e-7	1.88840e-4	2.9089	29	1.09%	20	1.11982e-3	2.3647	28	86	1.13%
	Cluster e: genes identifying an intrinsic group in head and neck squamous cell carcinoma (HNSCC).	14	1.26281e-6	3.03436e-4	2.6551	32	1.21%	18	4.34446e-4	2.4800	28	82	1.13%
	Genes up-regulated at 6 months of age in lungs from LIPA [GeneID=3988] knockout mice, which display pulmonary pathology.	15	1.67813e-6	3.76349e-4	2.9015	27	1.02%	17	2.31282e-4	2.6596	26	71	1.05%
	Genes representing epithelial differentiation module in sputum during asthma exacerbations.	17	2.40497e-6	4.75902e-4	3.3779	21	0.79%	29	5.52181e-3	2.4600	21	62	0.85%
	Genes down-regulated in CD34+ [GeneID=947] hematopoetic cells by expression of NUP98-HOXA9 fusion [GeneID=4928;3205] off a retroviral vector at 10 days after transduction.	19	2.76756e-6	4.90003e-4	2.0973	48	1.81%	4	3.46685e-6	2.4390	45	134	1.81%
	Genes with high-CpG-density promoters (HCP) without H3 methylation marks at K4 and K27 in embryonic stem cells (ES).	20	3.10161e-6	5.21691e-4	2.6865	29	1.09%	16	1.96199e-4	2.8114	24	62	0.97%
	Genes up-regulated in lung tissue upon LPS aspiration with mechanical ventilation (MV) compared to control (PBS aspiration without MV).	27	7.16318e-6	8.92479e-4	2.3271	35	1.32%	53	3.01875e-2	1.8157	32	128	1.29%
	Genes down-regulated in nasopharyngeal carcinoma (NPC) positive for LMP1 [GeneID=9260], a latent gene of Epstein-Barr virus (EBV).	28	9.27281e-6	1.11406e-3	2.0007	48	1.81%	15	1.18357e-4	2.1086	45	155	1.81%
	Up-regulated genes defining rejection of mammary carcinoma (MMC) tumors.	31	2.36929e-5	2.57106e-3	2.8919	21	0.79%	38	7.04320e-3	2.5090	19	55	0.76%
	Genes with intermediate-CpG-density promoters (ICP) bearing the tri-methylation mark at H3K27 (H3K27me3) in MCV6 cells (embryonic fibroblasts trapped in a differentiated state).	34	4.02379e-5	3.98119e-3	2.7854	21	0.79%	48	2.88105e-2	2.1482	21	71	0.85%
	Genes whose expression significantly and negatively correlated with oligodendrocyte density in layer VI of BA9 brain region in patients with bipolar disorder.	35	4.24043e-5	4.07566e-3	2.4095	27	1.02%	41	1.34741e-2	2.1113	25	86	1.01%
	Genes down-regulated in hepatocellular carcinoma (HCC) cells with hepatic stem cell properties.	37	5.02111e-5	4.56514e-3	2.3415	28	1.05%	39	7.13455e-3	2.2347	24	78	0.97%
	Genes representing Th1 / cytotoxic module in sputum during asthma exacerbations.	48	1.92928e-4	1.35210e-2	2.0922	30	1.13%	69	3.75105e-2	1.8487	28	110	1.13%
InterPro	Small proline-rich protein/late cornified envelope protein	1	2.54200e-24	2.39507e-20	35.3426	20	0.75%	3	2.54747e-7	4.9284	19	28	0.76%
	Late cornified envelope protein	2	7.08461e-16	3.33756e-12	40.5087	12	0.45%	15	1.15059e-3	4.6995	11	17	0.44%
	Ribonuclease A-domain	3	1.69866e-12	5.33493e-9	25.3472	11	0.41%	16	2.19337e-3	4.8419	10	15	0.40%
	Ribonuclease A	4	3.09368e-10	7.28717e-7	23.7734	9	0.34%	28	2.89642e-2	4.4695	8	13	0.32%
	S100/CaBP-9k-type, calcium binding, subdomain	5	3.26466e-10	6.15192e-7	11.3216	13	0.49%	19	5.51241e-3	3.6314	13	26	0.52%
	CD20-like	6	3.34369e-10	5.25071e-7	8.9954	15	0.56%	5	3.60269e-5	4.7367	15	23	0.60%
	Transcription elongation factor A-like/Brain expressed X-linked-like	7	7.86442e-10	1.05855e-6	17.0076	10	0.38%	14	9.54008e-4	5.1878	10	14	0.40%
	NACHT nucleoside triphosphatase	8	6.02031e-9	7.09042e-6	8.8445	13	0.49%	17	4.22481e-3	3.9616	12	22	0.48%
	C-type lectin	9	8.88315e-9	9.29968e-6	3.4135	31	1.17%	9	1.78977e-4	2.6180	31	86	1.25%
	Interleukin-1 receptor antagonist / Interleukin-36	10	1.00508e-8	9.46985e-6	27.8381	7	0.26%	23	1.71466e-2	6.2253	6	7	0.24%
	C-type lectin-like	11	1.22605e-8	1.05017e-5	3.1488	34	1.28%	10	2.11765e-4	2.4694	34	100	1.37%
	Butyrophylin-like	12	1.92144e-8	1.50865e-5	4.0431	24	0.90%	32	4.96561e-2	2.2764	21	67	0.85%
	C-type lectin fold	13	3.13282e-8	2.27057e-5	2.9683	35	1.32%	11	4.79406e-4	2.3537	35	108	1.41%
	DAPIN domain	14	3.26567e-8	2.19779e-5	7.6399	13	0.49%	17	4.22481e-3	3.9616	12	22	0.48%
	Serpin family	15	4.19919e-8	2.63765e-5	5.0747	18	0.68%	12	6.52640e-4	3.5277	17	35	0.68%
	Serpin domain	15	4.19919e-8	2.63765e-5	5.0747	18	0.68%	12	6.52640e-4	3.5277	17	35	0.68%
	Alpha-1B-glycoprotein/leukocyte immunoglobulin-like receptor	17	4.23600e-8	2.34774e-5	33.0476	6	0.23%	30	4.64070e-2	5.4472	6	8	0.24%
	Immunoglobulin V-set domain	18	1.00764e-7	5.27446e-5	2.2970	51	1.92%	6	5.44644e-5	2.1876	50	166	2.01%
	C-type lectin, conserved site	19	1.16306e-7	5.76757e-5	4.0962	21	0.79%	8	7.37987e-5	3.4664	21	44	0.85%
	Ribonuclease A, active site	22	3.10876e-7	1.33140e-4	23.4580	6	0.23%	30	4.64070e-2	5.4472	6	8	0.24%
TreeFam	MS4A1, MS4A12, MS4A15, MS4A18, MS4A2, ...	1	7.63668e-11	6.20557e-7	21.7230	10	0.38%	1	1.88593e-4	6.6026	10	11	0.40%
	CEACAM1, CEACAM16, CEACAM21, CEACAM3, CEACAM4, ...	2	2.87449e-8	1.16791e-4	9.8901	11	0.41%	2	1.67459e-2	4.4384	11	18	0.44%
HGNC Gene Families	LCE	1	4.25091e-17	2.03194e-14	40.6477	13	0.49%	1	1.79057e-4	4.8419	12	18	0.48%
	RNASE	2	1.94598e-10	4.65090e-8	25.0792	9	0.34%	4	4.50172e-3	4.8419	8	12	0.32%
	NLR	3	2.20196e-8	3.50845e-6	8.8761	12	0.45%	3	2.65501e-3	3.9946	11	20	0.44%
	SERPIN	4	1.60128e-7	1.91352e-5	4.8997	17	0.64%	2	4.31858e-4	3.5214	16	33	0.64%
	IL	5	3.82915e-7	3.66067e-5	4.5971	17	0.64%	7	2.36807e-2	2.4725	16	47	0.64%
	GIMAP	6	1.30856e-6	1.04249e-4	18.2720	6	0.23%	5	4.00147e-3	6.2253	6	7	0.24%
	SH2D	10	7.01673e-5	3.35400e-3	2.5408	23	0.87%	6	9.54929e-3	2.3813	20	61	0.81%
MSigDB Oncogenic Signatures	Genes down-regulated in four lineages of epithelial cell lines over-expressing an oncogenic form of KRAS [Gene ID=3845] gene.	1	3.64646e-8	6.81888e-6	3.9041	24	0.90%	1	3.25300e-6	3.5507	22	45	0.89%
	Genes down-regulated in four lineages of epithelial cell lines over-expressing an oncogenic form of KRAS [Gene ID=3845].	2	1.58417e-7	1.48120e-5	2.3796	46	1.73%	3	9.60400e-5	2.1361	40	136	1.61%
	Genes down-regulated in epithelial kidney cancer cell lines over-expressing an oncogenic form of KRAS [Gene ID=3845] gene.	5	4.97246e-5	1.85970e-3	2.0636	37	1.39%	16	5.29320e-3	1.8021	33	133	1.33%
MSigDB Immunologic Signatures	Genes down-regulated in comparison of healthy B cells versus healthy myeloid cells.	1	1.60042e-8	3.05680e-5	2.3481	55	2.07%	4	5.22628e-3	1.8341	50	198	2.01%
	Genes up-regulated in comparison of peripheral blood mononuclear cells (PBMC) from infancts with acute RSV infection versus PBMCs from infants with acute influenza infection.	2	4.01130e-7	3.83079e-4	2.2534	48	1.81%	6	5.38693e-3	1.9185	42	159	1.69%
	Genes up-regulated in comparison of untreated CD4 [GeneID=920] T cells at 0 h versus the cells treated with IL4 [GeneID=3565] and anti-IL12 at 0.5 h.	10	9.35747e-5	1.78728e-2	2.0206	36	1.36%	11	3.27193e-2	1.8284	36	143	1.45%
The test set of 2,655 genomic regions picked 2,484 genes (14%) of all 18,041 genes.
GO Molecular Function has 3,688 terms covering 15,090 (84%) of all 18,041 genes.	3,688 ontology terms were tested (100%) using an annotation count range of [1, Inf].
GO Biological Process has 10,440 terms covering 15,441 (86%) of all 18,041 genes.	10,440 ontology terms were tested (100%) using an annotation count range of [1, Inf].
GO Cellular Component has 1,265 terms covering 16,807 (93%) of all 18,041 genes.	1,265 ontology terms were tested (100%) using an annotation count range of [1, Inf].
Mouse Phenotype has 7,918 terms covering 7,524 (42%) of all 18,041 genes.	7,918 ontology terms were tested (100%) using an annotation count range of [1, Inf].
Human Phenotype has 6,146 terms covering 2,822 (16%) of all 18,041 genes.	6,146 ontology terms were tested (100%) using an annotation count range of [1, Inf].
Disease Ontology has 2,235 terms covering 7,886 (44%) of all 18,041 genes.	2,235 ontology terms were tested (100%) using an annotation count range of [1, Inf].
MSigDB Cancer Neighborhood has 427 terms covering 4,758 (26%) of all 18,041 genes.	427 ontology terms were tested (100%) using an annotation count range of [1, Inf].
MSigDB Perturbation has 3,364 terms covering 17,091 (95%) of all 18,041 genes.	3,364 ontology terms were tested (100%) using an annotation count range of [1, Inf].
InterPro has 9,422 terms covering 17,343 (96%) of all 18,041 genes.	9,422 ontology terms were tested (100%) using an annotation count range of [1, Inf].
TreeFam has 8,126 terms covering 13,550 (75%) of all 18,041 genes.	8,126 ontology terms were tested (100%) using an annotation count range of [1, Inf].
HGNC Gene Families has 478 terms covering 7,310 (41%) of all 18,041 genes.	478 ontology terms were tested (100%) using an annotation count range of [1, Inf].
MSigDB Oncogenic Signatures has 187 terms covering 10,315 (57%) of all 18,041 genes.	187 ontology terms were tested (100%) using an annotation count range of [1, Inf].
MSigDB Immunologic Signatures has 1,910 terms covering 16,609 (92%) of all 18,041 genes.	1,910 ontology terms were tested (100%) using an annotation count range of [1, Inf].
GREAT version 3.0.0
Species assembly: hg19
Association rule: Single nearest gene: 1000000 bp max extension, curated regulatory domains included

## Sheet: TableS6J_1st-exon_hypo
Table S6J: full results of GREAT annotation for hypomethylated regions in the 1st exon category in LMS compared to NM
Ontology	# Term Name	Binom Rank	Binom Raw P-Value	Binom FDR Q-Val	Binom Fold Enrichment	Binom Observed Region Hits	Binom Region Set Coverage	Hyper Rank	Hyper FDR Q-Val	Hyper Fold Enrichment	Hyper Observed Gene Hits	Hyper Total Genes	Hyper Gene Set Coverage
GO Molecular Function	olfactory receptor activity	1	2.26025e-308	8.33581e-305	21.5019	322	15.32%	1	7.21646e-222	7.2206	307	382	15.29%
	G-protein coupled receptor activity	2	5.54918e-171	1.02327e-167	5.3809	413	19.65%	2	7.49100e-163	4.3328	394	817	19.62%
	transmembrane signaling receptor activity	3	1.49347e-119	1.83598e-116	3.3700	470	22.36%	3	2.12692e-136	3.4006	447	1181	22.26%
	signaling receptor activity	4	3.75091e-112	3.45834e-109	3.1038	490	23.31%	4	1.25880e-133	3.2601	463	1276	23.06%
	receptor activity	5	1.95932e-104	1.44519e-101	2.8078	524	24.93%	5	2.86685e-127	2.9928	497	1492	24.75%
	signal transducer activity	6	1.91367e-84	1.17627e-81	2.5233	507	24.12%	6	1.98419e-104	2.7192	480	1586	23.90%
	peptidase inhibitor activity	7	2.41703e-9	1.27343e-6	2.8237	44	2.09%	7	1.71037e-5	2.3672	44	167	2.19%
	endopeptidase inhibitor activity	8	5.20292e-9	2.39854e-6	2.8295	42	2.00%	8	4.13073e-5	2.3438	42	161	2.09%
	endopeptidase regulator activity	9	1.05545e-8	4.32500e-6	2.7581	42	2.00%	9	9.19687e-5	2.2732	42	166	2.09%
	peptidase regulator activity	10	5.05045e-8	1.86261e-5	2.4758	46	2.19%	10	5.01122e-4	2.0562	46	201	2.29%
	cytokine receptor activity	17	2.38751e-6	5.17948e-4	2.9877	25	1.19%	19	1.49810e-2	2.3815	22	83	1.10%
	cysteine-type endopeptidase inhibitor activity	19	5.00267e-6	9.71044e-4	3.6111	18	0.86%	11	8.23137e-4	3.3005	18	49	0.90%
	cytokine activity	21	7.47382e-6	1.31254e-3	2.1101	43	2.05%	21	2.78193e-2	1.7716	42	213	2.09%
GO Biological Process	detection of chemical stimulus involved in sensory perception of smell	1	2.26025e-308	2.35970e-304	21.5019	322	15.32%	1	2.04284e-221	7.2206	307	382	15.29%
	detection of chemical stimulus involved in sensory perception	2	1.15028e-301	6.00445e-298	19.8799	326	15.51%	3	4.09913e-213	6.8823	311	406	15.49%
	sensory perception of smell	3	4.27827e-282	1.48884e-278	16.9731	328	15.60%	2	3.72668e-214	6.8757	313	409	15.59%
	sensory perception of chemical stimulus	4	5.06264e-279	1.32135e-275	15.4802	339	16.13%	4	1.78901e-202	6.3145	324	461	16.14%
	detection of chemical stimulus	5	1.56664e-264	3.27115e-261	14.6275	331	15.75%	5	1.59223e-200	6.4089	316	443	15.74%
	detection of stimulus involved in sensory perception	6	1.78699e-259	3.10936e-256	14.2618	329	15.65%	6	2.18092e-197	6.3539	314	444	15.64%
	detection of stimulus	7	5.44492e-200	8.12070e-197	7.8711	361	17.17%	7	5.50913e-165	4.9437	345	627	17.18%
	sensory perception	8	3.16124e-150	4.12542e-147	5.0522	386	18.36%	8	2.23515e-135	3.9644	368	834	18.33%
	G-protein coupled receptor signaling pathway	9	7.38464e-133	8.56619e-130	3.9312	437	20.79%	9	3.73775e-131	3.4870	418	1077	20.82%
	neurological system process	10	1.84362e-65	1.92474e-62	2.3195	464	22.07%	10	1.94886e-85	2.5670	442	1547	22.01%
	system process	11	5.29942e-54	5.02964e-51	2.0162	510	24.26%	11	8.41519e-73	2.2415	487	1952	24.25%
	inflammatory response	25	1.27481e-8	5.32359e-6	2.0370	76	3.62%	21	1.84767e-3	1.6992	73	386	3.64%
	negative regulation of peptidase activity	31	4.82644e-6	1.62542e-3	2.1492	43	2.05%	23	1.71549e-2	1.8664	43	207	2.14%
	acute-phase response	35	1.42876e-5	4.26180e-3	3.8521	15	0.71%	26	2.40387e-2	3.1446	14	40	0.70%
GO Cellular Component	intermediate filament	1	1.49985e-60	1.89732e-57	10.8775	90	4.28%	7	2.83887e-31	4.0546	88	195	4.38%
	keratin filament	2	3.99105e-53	2.52434e-50	28.7609	49	2.33%	9	7.32884e-19	4.4460	48	97	2.39%
	intermediate filament cytoskeleton	3	1.45297e-47	6.12669e-45	7.0785	94	4.47%	8	5.66349e-27	3.5174	92	235	4.58%
	MHC class II protein complex	11	3.39382e-9	3.90290e-7	14.5580	10	0.48%	14	7.56967e-3	4.2558	9	19	0.45%
	MHC protein complex	12	5.39979e-8	5.69228e-6	9.2793	11	0.52%	16	3.18367e-2	3.3276	10	27	0.50%
Human Phenotype	X-linked inheritance	1	6.43905e-22	3.95744e-18	3.0967	99	4.71%	1	1.09695e-26	3.8570	85	198	4.23%
	Gonosomal inheritance	2	7.13410e-20	2.19231e-16	2.8878	99	4.71%	2	7.48540e-26	3.7436	85	204	4.23%
	X-linked recessive inheritance	3	7.08662e-18	1.45181e-14	3.7364	62	2.95%	3	9.24812e-18	4.2427	51	108	2.54%
Disease Ontology	bacterial infectious disease	1	1.61189e-7	3.60257e-4	2.0551	63	3.00%	5	1.16703e-2	1.6915	61	324	3.04%
	Mycobacterium infectious disease	4	3.46788e-6	1.93768e-3	2.2529	40	1.90%	3	1.24613e-2	2.0202	38	169	1.89%
	malaria	5	4.29372e-6	1.91929e-3	2.8161	26	1.24%	1	2.63999e-2	2.4333	26	96	1.29%
	primary bacterial infectious disease	6	4.36971e-6	1.62772e-3	2.0240	50	2.38%	16	2.79024e-2	1.6846	48	256	2.39%
	primary Actinomycetales infectious disease	7	4.84861e-6	1.54809e-3	2.2204	40	1.90%	6	1.41977e-2	1.9509	38	175	1.89%
	parasitic infectious disease	9	6.63162e-6	1.64685e-3	2.4039	33	1.57%	12	1.70969e-2	1.9766	33	150	1.64%
	Apicomplexa infectious disease	11	1.00179e-5	2.03546e-3	2.6221	27	1.28%	4	1.04876e-2	2.3325	27	104	1.34%
	parasitic protozoa infectious disease	13	2.07152e-5	3.56142e-3	2.3776	30	1.43%	8	1.54719e-2	2.1058	30	128	1.49%
	tuberculosis	19	4.92326e-5	5.79131e-3	2.1388	34	1.62%	14	2.98097e-2	1.9296	32	149	1.59%
	amyloidosis	20	4.99409e-5	5.58089e-3	3.2837	16	0.76%	15	2.78824e-2	2.7504	15	49	0.75%
	nose disease	30	2.76423e-4	2.05935e-2	2.2150	25	1.19%	17	3.09118e-2	2.0992	25	107	1.25%
	sickle cell anemia	38	6.61934e-4	3.89322e-2	3.1116	12	0.57%	10	1.68337e-2	3.6604	11	27	0.55%
	autoimmune disease of the nervous system	39	6.73590e-4	3.86019e-2	2.4290	18	0.86%	2	1.77715e-2	2.9404	18	55	0.90%
	intrahepatic cholestasis	44	9.25770e-4	4.70249e-2	4.1043	8	0.38%	18	4.50716e-2	3.9931	8	18	0.40%
MSigDB Cancer Neighborhood	Neighborhood of HCK	7	5.34381e-8	3.25972e-6	4.1164	22	1.05%	5	3.86194e-2	2.1254	22	93	1.10%
	Neighborhood of CARD15	9	6.01984e-6	2.85608e-4	3.4161	19	0.90%	2	2.87456e-2	2.4740	19	69	0.95%
	Neighborhood of CD33	11	4.14227e-5	1.60795e-3	3.3372	16	0.76%	1	4.60025e-2	2.7645	16	52	0.80%
	Neighborhood of CD1D	12	5.51142e-5	1.96115e-3	3.6035	14	0.67%	4	2.68938e-2	2.7952	14	45	0.70%
	Neighborhood of IGFBP1	16	2.82428e-4	7.53729e-3	3.4313	12	0.57%	3	2.60400e-2	3.1710	12	34	0.60%
MSigDB Pathway	Genes involved in Olfactory Signaling Pathway	1	2.05630e-276	2.71432e-273	23.4688	279	13.27%	2	1.28035e-201	7.5200	267	319	13.30%
	Olfactory transduction	2	8.77862e-275	5.79389e-272	17.6530	314	14.94%	1	2.83505e-209	7.0141	299	383	14.89%
	Genes involved in GPCR downstream signaling	3	1.91498e-130	8.42589e-128	4.7521	357	16.98%	3	5.74469e-122	3.8880	341	788	16.98%
	Genes involved in Signaling by GPCR	4	1.28287e-117	4.23345e-115	4.1186	372	17.70%	4	6.12273e-113	3.5518	355	898	17.68%
	Asthma	5	2.10633e-13	5.56070e-11	15.3339	15	0.71%	6	8.29786e-5	4.4923	14	28	0.70%
	Autoimmune thyroid disease	8	1.79127e-10	2.95560e-8	6.7675	19	0.90%	8	5.67435e-4	3.2344	18	50	0.90%
	Retinol metabolism	11	1.09249e-9	1.31099e-7	4.9097	23	1.09%	17	3.68074e-2	2.3865	17	64	0.85%
	Graft-versus-host disease	12	1.51724e-9	1.66896e-7	7.3484	16	0.76%	10	5.35743e-4	3.6424	15	37	0.75%
	Allograft rejection	15	7.52190e-9	6.61927e-7	6.5468	16	0.76%	7	3.29681e-4	3.8505	15	35	0.75%
	Genes involved in Biological oxidations	16	7.64337e-9	6.30578e-7	3.1436	35	1.67%	15	3.64462e-2	1.9158	29	136	1.44%
	Cytokine-cytokine receptor interaction	20	7.31078e-7	4.82511e-5	2.0739	55	2.62%	12	7.86445e-3	1.7226	51	266	2.54%
	Genes involved in Peptide ligand-binding receptors	24	3.46518e-6	1.90585e-4	2.1352	45	2.14%	11	4.95068e-4	2.0508	42	184	2.09%
	Intestinal immune network for IgA production	27	8.40101e-6	4.10716e-4	4.0340	15	0.71%	13	2.55809e-2	2.7952	14	45	0.70%
	Type I diabetes mellitus	29	1.53290e-5	6.97735e-4	4.0629	14	0.67%	14	3.18380e-2	2.8488	13	41	0.65%
MSigDB Perturbation	Genes up-regulated in NB4 cells (acute promyelocytic leukemia, APL) in response to tretinoin [PubChem=444795]; based on Chip-seq data.	1	2.27655e-25	7.65832e-22	2.4793	165	7.85%	2	9.36999e-11	1.8061	157	781	7.82%
	Inflammatory cytokines, chemokines and their cognate receptors up-regulated in THP-1 cells (monocyte) after treatment with PSMD4 [GeneID=5710].	2	1.08026e-13	1.81700e-10	6.3973	27	1.28%	8	7.48314e-5	3.1251	24	69	1.20%
	Top 200 genes with high histone H3 trimethylation mark at K27 (H3K27me3) in PC3 cells (prostate cancer), by ChIP-chip assay on an 88K microarray (all promoters).	3	1.04654e-9	1.17352e-6	2.2957	67	3.19%	1	3.57775e-14	3.1064	65	188	3.24%
	Genes up-regulated in pulpal tissue extracted from carious teeth.	4	8.78104e-9	7.38486e-6	2.3878	55	2.62%	9	2.80661e-4	1.9966	52	234	2.59%
	Genes with low-CpG-density promoters (LCP) bearing the tri-methylation mark at H3K27 (H3K27me3) in MCV6 cells (embryonic fibroblasts trapped in a differentiated state).	6	2.94452e-8	1.65089e-5	7.7053	13	0.62%	11	5.25518e-4	4.3259	13	27	0.65%
	Genes with high-CpG-density promoters (HCP) with unmethylated histone H3 in MEF cells (embryonic fibroblast).	7	1.35061e-7	6.49066e-5	2.0659	63	3.00%	5	9.13872e-8	2.4157	57	212	2.84%
	Genes down-regulated in pulpal tissue extracted from carious teeth.	8	1.36585e-7	5.74339e-5	2.1738	56	2.66%	7	6.20740e-5	2.0885	53	228	2.64%
	Cluster e: genes identifying an intrinsic group in head and neck squamous cell carcinoma (HNSCC).	9	2.78059e-7	1.03932e-4	3.0392	29	1.38%	6	6.37761e-5	2.9583	27	82	1.34%
	Liver selective genes	10	9.64544e-7	3.24473e-4	2.1400	50	2.38%	15	6.46409e-3	1.8043	49	244	2.44%
	Genes down-regulated in liver samples of liver-specific knockout of HNF4A [GeneID=3172].	12	9.01178e-6	2.52630e-3	2.3672	33	1.57%	23	2.50396e-2	1.9614	31	142	1.54%
	Genes up-regulated at 3 months of age in lungs from LIPA [GeneID=3988] knockout mice, which display pulmonary pathology.	13	1.02853e-5	2.66152e-3	3.5745	17	0.81%	22	1.22322e-2	2.7275	17	56	0.85%
	A biomarker of plasma signaling proteins that predicts clinical Alzheimer's diagnosis.	15	1.36957e-5	3.07150e-3	9.3316	7	0.33%	24	2.73973e-2	4.8378	7	13	0.35%
	Up-regulated genes defining rejection of mammary carcinoma (MMC) tumors.	22	1.03631e-4	1.58462e-2	2.9570	17	0.81%	28	2.68827e-2	2.6137	16	55	0.80%
	Genes with unmethylated DNA in lung cancer samples.	24	1.10431e-4	1.54787e-2	3.3694	14	0.67%	10	3.70511e-4	4.1928	14	30	0.70%
	Genes up-regulated specifically in human liver tissue.	26	1.56530e-4	2.02525e-2	2.7545	18	0.86%	18	1.16042e-2	2.7770	17	55	0.85%
	Genes with high-CpG-density promoters (HCP) without H3 methylation marks at K4 and K27 in embryonic stem cells (ES).	30	2.18143e-4	2.44611e-2	2.4572	21	1.00%	13	1.80668e-3	2.8982	20	62	1.00%
	Genes up-regulated at 6 months of age in lungs from LIPA [GeneID=3988] knockout mice, which display pulmonary pathology.	31	2.36664e-4	2.56819e-2	2.5789	19	0.90%	27	2.52912e-2	2.4043	19	71	0.95%
InterPro	Olfactory receptor	1	1.76308e-308	1.66118e-304	21.5192	322	15.32%	1	4.00409e-222	7.2395	307	381	15.29%
	GPCR, rhodopsin-like, 7TM	2	2.34118e-214	1.10293e-210	7.5929	395	18.79%	2	1.13925e-183	5.0196	376	673	18.73%
	G protein-coupled receptor, rhodopsin-like	3	5.65595e-209	1.77634e-205	7.4953	389	18.51%	3	3.26400e-179	4.9839	370	667	18.43%
	High sulphur keratin-associated protein	4	3.91639e-43	9.22506e-40	51.5501	32	1.52%	4	1.77973e-12	4.9736	31	56	1.54%
	Intermediate filament protein	5	7.63854e-21	1.43941e-17	10.5875	30	1.43%	6	7.21307e-8	3.6923	30	73	1.49%
	Keratin-associated protein, PMG type	6	4.55490e-20	7.15271e-17	54.6381	14	0.67%	5	7.32296e-10	8.9846	13	13	0.65%
	Intermediate filament protein, conserved site	7	1.98812e-18	2.67601e-15	12.3200	24	1.14%	13	1.17892e-5	3.4779	24	62	1.20%
	Keratin, type I	8	8.33226e-17	9.81332e-14	17.6004	18	0.86%	11	1.09123e-6	4.9007	18	33	0.90%
	Keratin-associated protein, type6/8/16/19/20	9	2.64047e-15	2.76428e-12	29.3119	13	0.62%	10	1.08923e-6	7.1876	12	15	0.60%
	Proteinase inhibitor I25, cystatin	10	1.84890e-13	1.74203e-10	17.7924	14	0.67%	7	1.14584e-7	6.9880	14	18	0.70%
	7TM GPCR, olfactory receptor/chemoreceptor Srsx	11	5.55776e-12	4.76047e-9	37.6623	9	0.43%	19	3.05170e-3	6.9880	7	9	0.35%
	Keratin, type II	12	4.50697e-11	3.53873e-8	18.5610	11	0.52%	29	1.61172e-2	3.8012	11	26	0.55%
	Peptidase S1A, chymotrypsin-type	13	4.63074e-11	3.35622e-8	4.5492	29	1.38%	16	2.19605e-3	2.4351	29	107	1.44%
	Peptidase S1, trypsin family, active site	14	6.48976e-11	4.36761e-8	4.6365	28	1.33%	18	2.67736e-3	2.4424	28	103	1.39%
	Peptidase S1	15	3.51559e-10	2.20826e-7	4.1602	29	1.38%	27	1.00600e-2	2.2081	29	118	1.44%
	Trypsin-like cysteine/serine peptidase domain	16	7.65117e-10	4.50559e-7	4.0175	29	1.38%	31	1.98238e-2	2.1183	29	123	1.44%
	CC chemokine, conserved site	17	8.26340e-10	4.57987e-7	11.9783	12	0.57%	25	7.46386e-3	4.1179	11	24	0.55%
	MHC class II, alpha/beta chain, N-terminal	20	1.47482e-9	6.94787e-7	19.8302	9	0.43%	32	2.13799e-2	4.7918	8	15	0.40%
	Immunoglobulin C1-set	21	1.74016e-9	7.80753e-7	7.2767	16	0.76%	33	2.33148e-2	3.0679	14	41	0.70%
	Cystatin	22	1.05463e-8	4.51668e-6	15.7522	9	0.43%	15	2.60186e-4	6.7384	9	12	0.45%
TreeFam	KRTAP1-1, KRTAP1-3, KRTAP1-5, KRTAP10-1, KRTAP10-10, ...	1	2.64553e-30	2.14976e-26	71.2659	20	0.95%	1	1.00317e-6	5.1729	19	33	0.95%
	KRTAP11-1, KRTAP13-1, KRTAP13-2, KRTAP13-3, KRTAP13-4, ...	2	1.87317e-12	7.61069e-9	42.6174	9	0.43%	2	1.04820e-5	8.9846	9	9	0.45%
	OR6A2, OR6B1, OR6B2, OR6B3, OR6F1, ...	3	3.27458e-12	8.86976e-9	39.9978	9	0.43%	4	3.83371e-4	7.9863	8	9	0.40%
	OR5AC2, OR5H1, OR5H14, OR5H15, OR5H2, ...	4	5.89020e-12	1.19659e-8	28.3287	10	0.48%	3	6.29079e-5	8.0861	9	10	0.45%
	CEACAM1, CEACAM16, CEACAM21, CEACAM3, CEACAM4, ...	5	2.70431e-9	4.39505e-6	12.4920	11	0.52%	5	7.76089e-4	5.4906	11	18	0.55%
	MS4A1, MS4A12, MS4A15, MS4A18, MS4A2, ...	6	5.52060e-9	7.47673e-6	21.9504	8	0.38%	6	3.80898e-3	6.5342	8	11	0.40%
	OR10K1, OR10K2, OR10R2, OR10T2, OR10Z1	9	3.99256e-7	3.60483e-4	35.6752	5	0.24%	7	1.97411e-2	8.9846	5	5	0.25%
	BEX1, BEX2, BEX4, BEX5, NGFRAP1	12	3.32551e-6	2.25192e-3	23.0530	5	0.24%	7	1.97411e-2	8.9846	5	5	0.25%
	OR12D2, OR4D1, OR4D2, OR4M1, OR4M2, ...	13	6.54960e-6	4.09400e-3	10.4739	7	0.33%	9	3.91001e-2	6.7384	6	8	0.30%
HGNC Gene Families	KRTAP	1	2.83279e-74	1.35408e-71	41.9334	60	2.85%	2	9.11155e-31	5.7264	58	91	2.89%
	OR2	2	5.20691e-55	1.24445e-52	27.1259	52	2.47%	3	2.19913e-30	6.5708	49	67	2.44%
	OR5	3	5.20058e-47	8.28626e-45	29.0878	43	2.05%	1	2.55044e-32	8.0288	42	47	2.09%
	OR10	4	7.76952e-37	9.28457e-35	29.9372	33	1.57%	4	1.53684e-27	8.4712	33	35	1.64%
	OR6	5	1.33947e-32	1.28053e-30	36.2530	27	1.28%	6	1.95396e-19	7.7866	26	30	1.29%
	OR51	6	1.33066e-29	1.06009e-27	56.1555	21	1.00%	8	5.93441e-15	7.8127	20	23	1.00%
	OR52	7	6.07083e-28	4.14551e-26	36.0507	23	1.09%	10	8.28032e-13	7.1128	19	24	0.95%
	OR8	8	9.12773e-27	5.45382e-25	40.8887	21	1.00%	7	8.66634e-16	8.5353	19	20	0.95%
	OR4	9	3.38519e-25	1.79791e-23	9.2717	40	1.90%	5	4.83399e-26	7.0080	39	50	1.94%
	OR1	10	2.19816e-22	1.05072e-20	28.0582	20	0.95%	9	4.91677e-13	6.9112	20	26	1.00%
	OR7	11	4.87979e-12	2.12049e-10	38.2240	9	0.43%	11	4.99748e-6	7.3510	9	11	0.45%
	BPIF	12	2.15725e-8	8.59306e-7	18.3675	8	0.38%	14	6.09222e-4	5.5290	8	13	0.40%
	KLK	13	3.11180e-8	1.14418e-6	34.8285	6	0.29%	20	2.29706e-2	4.4923	6	12	0.30%
	TAAR	14	1.11910e-7	3.82091e-6	46.2542	5	0.24%	18	1.85164e-2	7.1876	4	5	0.20%
	CLEC	16	3.08388e-7	9.21310e-6	6.9167	12	0.57%	16	1.31839e-3	3.5938	12	30	0.60%
	OR56	17	5.93278e-7	1.66816e-5	32.8936	5	0.24%	13	6.25282e-4	8.9846	5	5	0.25%
	OR14	18	1.68917e-6	4.48569e-5	26.5218	5	0.24%	18	1.85164e-2	7.1876	4	5	0.20%
	NLR	19	1.92303e-6	4.83794e-5	8.4084	9	0.43%	17	3.86046e-3	4.0431	9	20	0.45%
	VSET	20	3.86096e-6	9.22769e-5	4.6034	14	0.67%	21	2.61126e-2	2.5391	13	46	0.65%
	OR9	21	9.90811e-6	2.25527e-4	12.7787	6	0.29%	15	1.38000e-3	6.7384	6	8	0.30%
MSigDB Oncogenic Signatures	Genes up-regulated in HEK293 cells (kidney fibroblasts) upon knockdown of TP53 [Gene ID=7157] gene by RNAi.	1	3.51166e-5	6.56681e-3	2.1489	35	1.67%	9	1.49777e-2	1.8336	30	147	1.49%
	Genes down-regulated in epithelial lung cancer cell lines over-expressing an oncogenic form of KRAS [Gene ID=3845] gene.	4	1.62845e-4	7.61302e-3	2.0294	33	1.57%	1	1.76954e-3	2.1962	33	135	1.64%
	Genes down-regulated in four lineages of epithelial cell lines over-expressing an oncogenic form of KRAS [Gene ID=3845].	5	2.60255e-4	9.73355e-3	2.0255	31	1.47%	4	3.44360e-3	2.0480	31	136	1.54%
	Genes down-regulated in epithelial kidney cancer cell lines over-expressing an oncogenic form of KRAS [Gene ID=3845] gene.	7	3.52304e-4	9.41155e-3	2.0429	29	1.38%	7	7.45732e-3	1.9590	29	133	1.44%
The test set of 2,102 genomic regions picked 2,008 genes (11%) of all 18,041 genes.
GO Molecular Function has 3,688 terms covering 15,090 (84%) of all 18,041 genes.	3,688 ontology terms were tested (100%) using an annotation count range of [1, Inf].
GO Biological Process has 10,440 terms covering 15,441 (86%) of all 18,041 genes.	10,440 ontology terms were tested (100%) using an annotation count range of [1, Inf].
GO Cellular Component has 1,265 terms covering 16,807 (93%) of all 18,041 genes.	1,265 ontology terms were tested (100%) using an annotation count range of [1, Inf].
Human Phenotype has 6,146 terms covering 2,822 (16%) of all 18,041 genes.	6,146 ontology terms were tested (100%) using an annotation count range of [1, Inf].
Disease Ontology has 2,235 terms covering 7,886 (44%) of all 18,041 genes.	2,235 ontology terms were tested (100%) using an annotation count range of [1, Inf].
MSigDB Cancer Neighborhood has 427 terms covering 4,758 (26%) of all 18,041 genes.	427 ontology terms were tested (100%) using an annotation count range of [1, Inf].
MSigDB Pathway has 1,320 terms covering 8,117 (45%) of all 18,041 genes.	1,320 ontology terms were tested (100%) using an annotation count range of [1, Inf].
MSigDB Perturbation has 3,364 terms covering 17,091 (95%) of all 18,041 genes.	3,364 ontology terms were tested (100%) using an annotation count range of [1, Inf].
InterPro has 9,422 terms covering 17,343 (96%) of all 18,041 genes.	9,422 ontology terms were tested (100%) using an annotation count range of [1, Inf].
TreeFam has 8,126 terms covering 13,550 (75%) of all 18,041 genes.	8,126 ontology terms were tested (100%) using an annotation count range of [1, Inf].
HGNC Gene Families has 478 terms covering 7,310 (41%) of all 18,041 genes.	478 ontology terms were tested (100%) using an annotation count range of [1, Inf].
MSigDB Oncogenic Signatures has 187 terms covering 10,315 (57%) of all 18,041 genes.	187 ontology terms were tested (100%) using an annotation count range of [1, Inf].
GREAT version 3.0.0
Species assembly: hg19
Association rule: Single nearest gene: 1000000 bp max extension, curated regulatory domains included

[truncated: 2 more sheets: TableS6K_body_hypo, TableS6L_3'UTR_hypo]
