# Supplementary material for: Genomic, Epigenomic, and Transcriptomic Profiling towards Identifying Omics Features and Specific Biomarkers That Distinguish Uterine Leiomyosarcoma and Leiomyoma at Molecular Levels
Source: Sarcoma. 2015 Dec 28;2015:412068. doi: 10.1155/2015/412068 (PMC4707342; doi:10.1155/2015/412068)
Supplement: Supplementary file 8 [file 412068.f8.xlsx]

## Sheet: TableS7a
Table S7a: β values of 133 CpG probes in the TSS200 regions of the 37 PcG target gene loci hypermethylated (Δβ > 0.2) in LMS compared to NM
TargetID	NM1_β	NM2_β	NM3_β	LM1_β	LM2_β	LM3_β	LMS1_β	LMS2_β	LMS3_β
cg20303399	0.221247	0.236519	0.222185	0.412438	0.527054	0.494148	0.321894	0.821398	0.737852
cg23008606	0.297947	0.300025	0.21602	0.513211	0.627391	0.568028	0.125686	0.870359	0.706498
cg02174634	0.221691	0.258116	0.228374	0.784836	0.690183	0.443896	0.106762	0.70757	0.87093
cg23460057	0.273771	0.262772	0.294188	0.799654	0.78653	0.614956	0.127149	0.687112	0.748947
cg12117658	0.0862505	0.0972107	0.20117	0.582617	0.424653	0.446188	0.174003	0.684962	0.355363
cg00751332	0.76762	0.774509	0.720743	0.716804	0.840054	0.847056	0.874282	0.939088	0.913784
cg05384868	0.188225	0.251651	0.193868	0.516616	0.405582	0.454538	0.568026	0.573676	0.582292
cg13313047	0.765902	0.681819	0.711022	0.638175	0.77881	0.841063	0.784843	0.754877	0.870925
cg19476622	0.254801	0.300594	0.285665	0.51371	0.476469	0.483511	0.665958	0.535786	0.627731
cg20759047	0.656924	0.684263	0.635515	0.570129	0.760815	0.747137	0.429854	0.384511	0.829405
cg20786131	0.377583	0.371168	0.404008	0.670637	0.640616	0.579233	0.791365	0.713523	0.669599
cg24964110	0.787092	0.715005	0.736591	0.61727	0.801299	0.883219	0.66428	0.365279	0.883549
cg01971122	0.123161	0.152642	0.165233	0.202148	0.203407	0.177419	0.149368	0.804214	0.673943
cg02077276	0.195068	0.210924	0.241768	0.300544	0.205066	0.441854	0.283706	0.865329	0.835148
cg17072805	0.142828	0.138513	0.174939	0.219013	0.12986	0.157905	0.141071	0.788172	0.809465
cg24117998	0.177792	0.197703	0.224722	0.282633	0.161532	0.234671	0.242393	0.858384	0.813689
cg25943588	0.0560378	0.0626798	0.1414	0.114161	0.137901	0.113192	0.170056	0.796079	0.795697
cg27413462	0.117176	0.100252	0.164361	0.186728	0.114294	0.150597	0.107305	0.719274	0.75233
cg14844588	0.0836338	0.149427	0.175238	0.575519	0.41372	0.509896	0.187294	0.615605	0.133454
cg23847109	0.0389112	0.0585892	0.0456755	0.870262	0.765537	0.674003	0.767258	0.964922	0.124575
cg26011014	0.0272904	0.0187604	0.00402905	0.551936	0.285749	0.487683	0.246264	0.809368	0.0141078
cg26710722	0.0715029	0.0855518	0.0902025	0.294947	0.217525	0.283719	0.420813	0.52156	0.106317
cg20684180	0.0968233	0.109654	0.093155	0.719525	0.740692	0.495733	0.0713872	0.872088	0.11871
cg23881725	0.167132	0.170698	0.127641	0.692084	0.686769	0.441286	0.0988066	0.825157	0.154741
cg00152008	0.0653748	0.0881575	0.0880233	0.0736252	0.064864	0.0787406	0.0759496	0.639528	0.353896
cg11448896	0.162303	0.153765	0.173143	0.169818	0.14292	0.136785	0.149403	0.886121	0.644927
cg13210260	0.0462032	0.0507994	0.0611321	0.0368748	0.106693	0.0379116	0.0285952	0.0337034	0.266623
cg00556112	0.0695261	0.0720934	0.133455	0.0736529	0.0969256	0.083577	0.823986	0.053565	0.0643399
cg06825142	0.0687629	0.0580287	0.137882	0.0504546	0.0703839	0.060178	0.746209	0.0388768	0.046172
cg12928379	0.0116277	0.0550698	0.0739606	0.0138432	0.0654926	0.0200851	0.846002	0.0188657	0.0163675
cg20931042	0.0628924	0.0387275	0.0800088	0.0454011	0.169518	0.0845258	0.828378	0.0429184	0.0358396
cg07363855	0.187707	0.250437	0.219074	0.222491	0.253092	0.489094	0.492228	0.835998	0.618028
cg11229543	0.144573	0.270174	0.170923	0.124997	0.206722	0.259867	0.503627	0.925083	0.386497
cg04158367	0.0355191	0.0676302	0.106514	0.27522	0.319378	0.189043	0.0664323	0.522538	0.770628
cg09022720	0.053844	0.050543	0.0493275	0.0515622	0.0801627	0.0871885	0.0607183	0.0650283	0.0408708
cg13107975	0.0595386	0.0661141	0.0666434	0.0619762	0.0689014	0.0990725	0.0789877	0.0615626	0.0612742
cg16297569	0.173277	0.194117	0.18906	0.401019	0.617481	0.376748	0.249284	0.836319	0.822386
cg17858328	0.0305547	0.0634644	0.04589	0.305194	0.61593	0.206828	0.0631481	0.860486	0.857201
cg18182148	0.156362	0.224168	0.21455	0.416007	0.590642	0.32305	0.110066	0.824642	0.834905
cg22488998	0	0.00120628	0.0255718	0.0241026	0.00520758	0.0160048	0.006545	0.0087347	0
cg22628500	0.0759927	0.073006	0.0678775	0.0660351	0.100106	0.0881195	0.0855037	0.0690063	0.0572347
cg24683414	0.259108	0.315831	0.213977	0.60834	0.617346	0.596484	0.336803	0.819907	0.872957
cg26027669	0.058448	0.085958	0.10532	0.303075	0.55222	0.276853	0.0555544	0.598267	0.882741
cg27432653	0.0295175	0.0322708	0.0515526	0.172052	0.274357	0.0942829	0.0314161	0.237545	0.84999
cg02357751	0.687782	0.683265	0.699373	0.781141	0.904971	0.848036	0.753919	0.915962	0.883683
cg03263514	0.5968	0.511916	0.571809	0.448485	0.56944	0.876188	0.772391	0.770949	0.88885
cg14130977	0.415418	0.347891	0.376356	0.285042	0.33773	0.687093	0.656495	0.494495	0.758878
cg16210718	0.56781	0.46115	0.518526	0.391754	0.652311	0.818634	0.712721	0.653093	0.855808
cg16627786	0.605606	0.535255	0.550513	0.45666	0.558693	0.811889	0.744978	0.604332	0.882412
cg23787873	0.700237	0.655192	0.666533	0.767078	0.833069	0.827411	0.75244	0.896445	0.853955
cg16811108	0.354164	0.384419	0.412595	0.82086	0.787105	0.724117	0.759371	0.830899	0.401139
cg25587223	0.125125	0.17201	0.172952	0.466354	0.359301	0.438906	0.20437	0.589669	0.126122
cg25046571	0.0412944	0.590382	0.0328797	0.0424077	0.0385371	0.610921	0.0524431	0.905698	0.747992
cg01370449	0.484652	0.635705	0.525989	0.865106	0.813326	0.73749	0.816403	0.916893	0.929111
cg04863892	0.401728	0.62423	0.480073	0.87077	0.870494	0.840297	0.796608	0.936852	0.900732
cg12128839	0.202368	0.371454	0.247711	0.537286	0.481296	0.420802	0.738112	0.683234	0.745794
cg19759481	0.450977	0.625428	0.483833	0.81638	0.85705	0.807206	0.8145	0.934336	0.933441
cg03529432	0.278207	0.332241	0.314142	0.714444	0.726672	0.518227	0.481954	0.872505	0.505713
cg04265576	0.218394	0.294467	0.240533	0.705855	0.738688	0.403981	0.505253	0.817458	0.402768
cg12810523	0.185808	0.227683	0.197481	0.687995	0.748618	0.388368	0.313781	0.835434	0.40713
cg14044640	0.188698	0.254806	0.223882	0.737561	0.827595	0.508177	0.331325	0.870663	0.576513
cg17994139	0.155272	0.22798	0.201177	0.662328	0.701914	0.453279	0.357775	0.811697	0.466408
cg22469274	0.105462	0.166778	0.158711	0.575788	0.621293	0.375937	0.182512	0.753296	0.326846
cg10505324	0.0139	0.0141551	0.0204252	0.0248783	0.0239858	0.0231312	0.013109	0.0158878	0.656657
cg25116388	0.128024	0.148296	0.147437	0.500424	0.341863	0.385288	0.160719	0.120745	0.799286
cg27294582	0.268318	0.273557	0.267364	0.351091	0.626263	0.901756	0.247501	0.766954	0.842218
cg27464311	0.0509321	0.0589511	0.0767939	0.0662027	0.0924316	0.0963475	0.0655618	0.0584815	0.755753
cg02694427	0.319014	0.405674	0.343763	0.849703	0.652607	0.175893	0.722035	0.930524	0.934761
cg03874199	0.213862	0.285501	0.232281	0.567638	0.256767	0.148378	0.588487	0.756531	0.723346
cg11754318	0.431096	0.465998	0.408969	0.834945	0.727414	0.320983	0.691005	0.843159	0.827556
cg12268637	0.410285	0.469016	0.362554	0.854659	0.597956	0.267219	0.645232	0.878572	0.859384
cg18022224	0.169788	0.22552	0.1416	0.777644	0.211478	0.112155	0.451045	0.19213	0.808502
cg04843067	0.615075	0.483129	0.60397	0.833195	0.834915	0.764656	0.736321	0.851755	0.699849
cg21011616	0.593488	0.49298	0.624019	0.910451	0.91432	0.882702	0.771137	0.902586	0.713596
cg05436064	0.265814	0.280934	0.285181	0.158554	0.555163	0.301419	0.535207	0.34538	0.806748
cg07816687	0.466521	0.493258	0.475274	0.415742	0.803428	0.515489	0.73902	0.593179	0.914159
cg09030672	0.396639	0.38535	0.372016	0.395315	0.6157	0.408756	0.619131	0.486413	0.752308
cg18705279	0.315239	0.352131	0.342474	0.375337	0.709288	0.3906	0.613515	0.421924	0.788438
cg00318756	0.244221	0.294188	0.323608	0.725106	0.484466	0.568878	0.556334	0.916404	0.828132
cg01356829	0.711779	0.735004	0.693917	0.808279	0.737721	0.863367	0.68293	0.784447	0.878296
cg06952660	0.327469	0.342271	0.37302	0.614818	0.414604	0.478711	0.561851	0.537816	0.791332
cg11132246	0.619239	0.64103	0.576127	0.876294	0.758271	0.729861	0.705528	0.853931	0.825509
cg19745415	0.707505	0.684371	0.651877	0.932835	0.866021	0.824271	0.72997	0.928759	0.913275
cg09232937	0.16842	0.154421	0.317545	0.164453	0.316552	0.201646	0.686473	0.211007	0.426532
cg24678862	0.0512133	0.121238	0.400405	0.047842	0.126738	0.171395	0.791873	0.0483516	0.783068
cg09408768	0.108561	0.130272	0.14752	0.287801	0.13671	0.274784	0.393195	0.724683	0.777942
cg11856810	0.0683216	0.0684345	0.159086	0.0843657	0.100447	0.12053	0.122312	0.111158	0.566312
cg25534294	0.242835	0.268936	0.247033	0.270621	0.161984	0.268652	0.0936633	0.54071	0.383947
cg04920649	0.290084	0.369017	0.242278	0.362778	0.239844	0.400167	0.118407	0.776353	0.627095
cg07216112	0.170978	0.224373	0.150029	0.216987	0.0799568	0.327996	0.0633385	0.871146	0.501811
cg06755413	0.0325897	0.0372861	0.0363991	0.0373273	0.146985	0.279215	0.0433897	0.805706	0.0236741
cg23393521	0.0286583	0.0185062	0.0150639	0.0119462	0.176797	0.267909	0.0207832	0.510491	0.00512928
cg24071726	0.0463147	0.06759	0.0609367	0.0552654	0.104304	0.264422	0.0662018	0.753032	0.0366724
cg02548364	0.1667	0.311209	0.210062	0.535381	0.523044	0.442408	0.541851	0.834092	0.202965
cg09424526	0.0125811	0.0233851	0.0586696	0.0275639	0.0369071	0.0359831	0.0178419	0.315626	0.74415
cg15133719	0.141374	0.159312	0.238341	0.202077	0.149501	0.204021	0.181152	0.80093	0.567047
cg15703632	0.127915	0.122335	0.183226	0.138035	0.13762	0.158845	0.112392	0.0792106	0.602322
cg20584905	0.127619	0.145559	0.209779	0.411565	0.346945	0.147454	0.100241	0.834075	0.509249
cg23655970	0.183509	0.205633	0.159277	0.178588	0.273116	0.196068	0.280216	0.862522	0.426698
cg02022733	0.272147	0.380572	0.350872	0.528857	0.476829	0.701385	0.798437	0.906725	0.881433
cg03640756	0.0754329	0.124794	0.126935	0.233392	0.294128	0.343106	0.633403	0.858338	0.777127
cg15361590	0.234703	0.340918	0.319096	0.443688	0.425417	0.580855	0.714024	0.885945	0.848051
cg15949044	0.146344	0.244334	0.240097	0.426883	0.367003	0.576714	0.783003	0.942395	0.885406
cg23445461	0.217047	0.320259	0.29082	0.565375	0.494341	0.683966	0.783007	0.950656	0.906096
cg22379213	0.491946	0.45324	0.449851	0.728479	0.740968	0.598307	0.478218	0.81375	0.746454
cg02191312	0.00331056	0.013822	0.0166418	0.197885	0.0329738	0.0113712	0.00868202	0.00800253	0.777518
cg17929687	0.0309902	0.0502531	0.0876555	0.348255	0.105342	0.0386544	0.0198123	0.0156019	0.884875
cg18242103	0.175932	0.1753	0.267941	0.295211	0.198364	0.181171	0.126341	0.120239	0.865234
cg24089118	0.053194	0.0963882	0.169819	0.172897	0.116812	0.0868976	0.0421818	0.0448158	0.797504
cg24989962	0.083616	0.144317	0.215444	0.220285	0.159483	0.124495	0.0785106	0.0242266	0.867734
cg04927931	0.0495525	0.0665633	0.133264	0.0495176	0.253174	0.0525864	0.476731	0.0377746	0.812844
cg08133486	0.207149	0.266213	0.279415	0.213307	0.905387	0.225082	0.349605	0.32546	0.850046
cg11471772	0.101058	0.13527	0.194838	0.141304	0.197954	0.0818109	0.416837	0.0149957	0.555111
cg11891393	0.148706	0.129535	0.231433	0.262477	0.208696	0.143012	0.368	0.206808	0.371499
cg21063722	0.0564062	0.0965584	0.153067	0.0891254	0.248454	0.0783222	0.394644	0.0904289	0.891576
cg22478310	0.221301	0.236488	0.278808	0.224248	0.302804	0.1919	0.448442	0.536955	0.695011
cg12377139	0.116564	0.142881	0.312473	0.128622	0.276988	0.151687	0.498189	0.598823	0.746835
cg12610471	0.122321	0.117204	0.32445	0.146356	0.190108	0.146273	0.350233	0.549981	0.681252
cg18247055	0.0641268	0.0622548	0.372495	0.0725987	0.196598	0.0429563	0.646192	0.802466	0.711985
cg23016129	0.0909258	0.109021	0.290053	0.0882619	0.217661	0.0780576	0.624334	0.826647	0.694565
cg04346113	0.0345057	0.0345692	0.0442094	0.0459194	0.0928529	0.0645427	0.0481079	0.593484	0.0262729
cg21263122	0.0507048	0.0581431	0.0595477	0.104036	0.0889238	0.138088	0.0422587	0.872652	0.0443085
cg19797376	0.224612	0.236435	0.300937	0.259012	0.283149	0.259108	0.596143	0.914161	0.908204
cg05940231	0.234913	0.315717	0.239162	0.613925	0.629714	0.604534	0.793013	0.932514	0.841397
cg12664119	0.505764	0.534317	0.469518	0.778947	0.844646	0.853637	0.755193	0.864461	0.806232
cg25340966	0.15191	0.269822	0.15275	0.611039	0.686338	0.608665	0.805225	0.935466	0.866388
cg26272623	0.361687	0.412963	0.360599	0.65216	0.742716	0.691415	0.72337	0.872102	0.66782
cg04527918	0.237606	0.251618	0.257255	0.312439	0.429446	0.322375	0.589634	0.180186	0.433513
cg05113927	0.417139	0.375502	0.422871	0.590295	0.773265	0.583419	0.909382	0.70031	0.91418
cg05231308	0.28998	0.294154	0.303477	0.431372	0.583116	0.337672	0.673631	0.302689	0.660295
cg13833437	0.38122	0.347328	0.370875	0.469727	0.589626	0.522975	0.841905	0.344814	0.829988
cg21752601	0.512688	0.473915	0.459208	0.578983	0.792095	0.658073	0.91157	0.667921	0.8629
cg22129545	0.579045	0.44987	0.464327	0.730819	0.932678	0.748083	0.952328	0.874184	0.94467

## Sheet: TableS7b
Table S7b: Z-scores of 133 CpG probes in the TSS200 regions of the 37 PcG target gene loci hypermethylated (Δβ > 0.2) in LMS compared to NM
TargetID	Average of β values	Standard deviation of β values	NM1_ Zscore	NM2_ Zscore	NM3_ Zscore	LM1_ Zscore	LM2_ Zscore	LM3_ Zscore	LMS1_ Zscore	LMS2_ Zscore	LMS3_ Zscore
cg20303399	0.443859	0.209753	-1.06131	-0.988499	-1.05683	-0.149802	0.396631	0.239751	-0.581472	1.79992	1.40161
cg23008606	0.469463	0.234288	-0.732074	-0.723203	-1.08176	0.186731	0.674081	0.4207	-1.46733	1.71113	1.01173
cg02174634	0.479151	0.271128	-0.949589	-0.815243	-0.92494	1.12746	0.77835	-0.13003	-1.37348	0.842477	1.445
cg23460057	0.510564	0.251644	-0.940987	-0.984695	-0.859853	1.14881	1.09665	0.414838	-1.52364	0.701578	0.947301
cg12117658	0.339157	0.201852	-1.25293	-1.19864	-0.683606	1.20613	0.423558	0.530241	-0.818195	1.71316	0.0802831
cg00751332	0.821549	0.0762678	-0.707103	-0.616766	-1.32174	-1.37338	0.242627	0.334441	0.691427	1.54113	1.20936
cg05384868	0.414942	0.154765	-1.46491	-1.05509	-1.42845	0.656961	-0.0604743	0.255849	0.989146	1.02565	1.08132
cg13313047	0.758604	0.0693162	0.105289	-1.10774	-0.68645	-1.73739	0.291499	1.1896	0.378544	-0.0537724	1.62042
cg19476622	0.460469	0.140599	-1.4628	-1.13711	-1.24328	0.378669	0.113799	0.16388	1.46153	0.535681	1.18964
cg20759047	0.633173	0.140678	0.168837	0.363173	0.0166498	-0.448142	0.907338	0.810106	-1.44527	-1.76759	1.3949
cg20786131	0.579748	0.148316	-1.36308	-1.40632	-1.18491	0.612806	0.410394	-0.00346948	1.4268	0.90196	0.605812
cg24964110	0.717065	0.150631	0.46489	-0.0136737	0.129632	-0.662509	0.559206	1.10305	-0.350428	-2.33541	1.10524
cg01971122	0.294615	0.240734	-0.712214	-0.58975	-0.537448	-0.384106	-0.378874	-0.48683	-0.603352	2.11686	1.57572
cg02077276	0.397712	0.252056	-0.803965	-0.741056	-0.618687	-0.385503	-0.7643	0.175128	-0.452305	1.85521	1.73547
cg17072805	0.300196	0.267757	-0.587729	-0.603843	-0.467801	-0.303196	-0.63616	-0.531422	-0.59429	1.82246	1.90198
cg24117998	0.354835	0.259644	-0.68187	-0.605185	-0.501122	-0.278084	-0.744495	-0.462805	-0.433064	1.93938	1.76724
cg25943588	0.265245	0.285682	-0.732309	-0.709059	-0.433508	-0.528853	-0.445754	-0.532245	-0.3332	1.85813	1.8568
cg27413462	0.268035	0.251592	-0.599616	-0.666885	-0.412071	-0.323171	-0.611073	-0.46678	-0.63885	1.79353	1.92492
cg14844588	0.315976	0.198802	-1.16871	-0.837761	-0.707932	1.30553	0.491661	0.975443	-0.647287	1.50717	-0.918112
cg23847109	0.478859	0.376569	-1.16831	-1.11605	-1.15034	1.03939	0.76129	0.518215	0.765858	1.29077	-0.940821
cg26011014	0.271687	0.274232	-0.891206	-0.922311	-0.976029	1.02194	0.0512756	0.787637	-0.0927095	1.96068	-0.939277
cg26710722	0.23246	0.152552	-1.0551	-0.963002	-0.932516	0.409609	-0.0978994	0.336013	1.23468	1.89509	-0.826882
cg20684180	0.368641	0.316022	-0.860122	-0.819522	-0.87173	1.11032	1.17729	0.402161	-0.94061	1.59307	-0.790864
cg23881725	0.373813	0.274003	-0.754303	-0.741286	-0.89843	1.16156	1.14217	0.24625	-1.00366	1.64723	-0.799525
cg00152008	0.169795	0.187425	-0.557132	-0.435576	-0.436292	-0.513113	-0.559858	-0.485819	-0.500711	2.50624	0.982261
cg11448896	0.29102	0.260163	-0.494757	-0.527574	-0.45309	-0.465872	-0.569261	-0.592842	-0.54434	2.28741	1.36032
cg13210260	0.0742818	0.0715032	-0.39269	-0.328411	-0.183904	-0.523152	0.453291	-0.508652	-0.638945	-0.567504	2.68997
cg00556112	0.163458	0.234554	-0.400469	-0.389524	-0.127916	-0.382875	-0.283654	-0.340564	2.8161	-0.468518	-0.42258
cg06825142	0.141883	0.215386	-0.339484	-0.389321	-0.0185753	-0.424486	-0.331958	-0.379342	2.80577	-0.47824	-0.444369
cg12928379	0.12459	0.256073	-0.441135	-0.271488	-0.197717	-0.432483	-0.230785	-0.408108	2.81721	-0.41287	-0.422625
cg20931042	0.154246	0.241525	-0.378234	-0.478285	-0.307366	-0.450654	0.0632347	-0.288664	2.79115	-0.460934	-0.490242
cg07363855	0.396461	0.212714	-0.981384	-0.686482	-0.833924	-0.817861	-0.673997	0.435482	0.450215	2.06633	1.04162
cg11229543	0.332496	0.238704	-0.787264	-0.261085	-0.676876	-0.869271	-0.526904	-0.304263	0.716917	2.48252	0.226225
cg04158367	0.261434	0.232586	-0.971317	-0.833256	-0.666075	0.0592769	0.24913	-0.311243	-0.838406	1.12262	2.18928
cg09022720	0.0599162	0.0143366	-0.423541	-0.653792	-0.738573	-0.582701	1.41223	1.90229	0.0559501	0.35658	-1.32844
cg13107975	0.0693412	0.0118828	-0.824938	-0.271574	-0.227038	-0.619803	-0.037011	2.50205	0.811804	-0.654608	-0.678879
cg16297569	0.428855	0.25169	-1.01545	-0.932645	-0.952735	-0.110593	0.749437	-0.207027	-0.713456	1.61891	1.56355
cg17858328	0.338744	0.3281	-0.939315	-0.839011	-0.892575	-0.102254	0.844821	-0.402061	-0.839975	1.59019	1.58018
cg18182148	0.410488	0.262409	-0.968435	-0.71004	-0.746691	0.0210322	0.686541	-0.333212	-1.14486	1.57828	1.61739
cg22488998	0.00970809	0.00937188	-1.03587	-0.907161	1.6927	1.53592	-0.480214	0.671877	-0.337508	-0.103863	-1.03587
cg22628500	0.0758757	0.0124429	0.00940095	-0.230631	-0.642792	-0.790854	1.9473	0.983991	0.77377	-0.552072	-1.49812
cg24683414	0.515639	0.229599	-1.1173	-0.870248	-1.31386	0.403752	0.442975	0.352111	-0.778906	1.32521	1.55627
cg26027669	0.324271	0.276732	-0.960579	-0.861169	-0.791201	-0.0765945	0.82372	-0.17135	-0.971035	0.990117	2.01809
cg27432653	0.196998	0.246972	-0.678136	-0.666988	-0.588915	-0.101008	0.313227	-0.415899	-0.670449	0.164176	2.64399
cg02357751	0.795348	0.0896949	-1.19924	-1.24961	-1.07002	-0.158395	1.22218	0.587414	-0.461894	1.34471	0.984842
cg03263514	0.667425	0.152824	-0.462135	-1.01758	-0.625664	-1.43264	-0.641168	1.36604	0.686844	0.67741	1.44889
cg14130977	0.484377	0.164135	-0.420136	-0.831549	-0.658127	-1.21446	-0.893453	1.23505	1.04863	0.0616401	1.6724
cg16210718	0.625756	0.147516	-0.392813	-1.11585	-0.726909	-1.58628	0.180014	1.3075	0.589526	0.185313	1.5595
cg16627786	0.638926	0.13374	-0.249144	-0.775168	-0.661084	-1.36284	-0.59992	1.29327	0.792964	-0.258666	1.82058
cg23787873	0.772485	0.0811891	-0.889873	-1.44468	-1.30499	-0.0665854	0.746216	0.67652	-0.24689	1.52681	1.00347
cg16811108	0.608297	0.199684	-1.27267	-1.12116	-0.980057	1.0645	0.895457	0.580018	0.756568	1.11477	-1.03743
cg25587223	0.294979	0.162155	-1.04748	-0.758341	-0.752532	1.05686	0.396672	0.887592	-0.55878	1.81733	-1.04133
cg25046571	0.340284	0.344519	-0.867847	0.725935	-0.892271	-0.864615	-0.87585	0.785552	-0.835487	1.64117	1.18341
cg01370449	0.747186	0.154683	-1.69724	-0.720708	-1.43	0.762332	0.427585	-0.0626835	0.447474	1.09713	1.17611
cg04863892	0.746865	0.184676	-1.86888	-0.664054	-1.44465	0.670932	0.669435	0.505925	0.269354	1.02876	0.833172
cg12128839	0.492006	0.190579	-1.51978	-0.632558	-1.28186	0.237589	-0.0561984	-0.37362	1.29136	1.0034	1.33167
cg19759481	0.747017	0.17212	-1.71996	-0.706417	-1.52908	0.402995	0.639282	0.349694	0.39207	1.08831	1.08311
cg03529432	0.527123	0.194957	-1.27677	-0.999612	-1.09245	0.960832	1.02355	-0.0456309	-0.231686	1.77158	-0.109818
cg04265576	0.480822	0.211972	-1.23803	-0.879152	-1.13359	1.06162	1.21651	-0.362506	0.115259	1.58812	-0.368229
cg12810523	0.443589	0.235981	-1.09238	-0.91493	-1.04291	1.03571	1.2926	-0.234006	-0.550077	1.66049	-0.154499
cg14044640	0.502135	0.251384	-1.24685	-0.983869	-1.10689	0.936515	1.29467	0.0240322	-0.679478	1.46599	0.29587
cg17994139	0.448648	0.222663	-1.31758	-0.991043	-1.11142	0.959658	1.13744	0.0207982	-0.408119	1.63049	0.0797641
cg22469274	0.362958	0.222346	-1.15809	-0.882317	-0.918603	0.957204	1.16186	0.0583717	-0.811557	1.75554	-0.162415
cg10505324	0.0895699	0.200543	-0.377325	-0.376053	-0.344788	-0.322582	-0.327033	-0.331294	-0.38127	-0.367413	2.82776
cg25116388	0.303565	0.217502	-0.807075	-0.713871	-0.71782	0.905092	0.176081	0.375734	-0.656753	-0.840543	2.27915
cg27294582	0.505003	0.26045	-0.908754	-0.888639	-0.912418	-0.590945	0.465582	1.52334	-0.988682	1.00577	1.29475
cg27464311	0.146828	0.215775	-0.444427	-0.407263	-0.324572	-0.373656	-0.252099	-0.233951	-0.376626	-0.40944	2.82203
cg02694427	0.592664	0.271432	-1.00817	-0.688903	-0.916993	0.946973	0.220842	-1.53545	0.476626	1.24473	1.26034
cg03874199	0.419199	0.224028	-0.916572	-0.596791	-0.834351	0.662591	-0.725051	-1.20887	0.755656	1.50576	1.35763
cg11754318	0.616792	0.196897	-0.943112	-0.765852	-1.05549	1.10796	0.56183	-1.50235	0.376914	1.14968	1.07043
cg12268637	0.593875	0.219018	-0.838244	-0.570087	-1.05618	1.1907	0.0186311	-1.49146	0.234487	1.29988	1.21227
cg18022224	0.343318	0.25712	-0.6749	-0.458143	-0.784529	1.6892	-0.512756	-0.899049	0.418976	-0.588007	1.80921
cg04843067	0.713652	0.118445	-0.83226	-1.94625	-0.926019	1.00928	1.0238	0.430616	0.19139	1.16598	-0.116529
cg21011616	0.756142	0.149628	-1.08706	-1.75878	-0.883009	1.03128	1.05714	0.845828	0.100213	0.978722	-0.284343
cg05436064	0.392711	0.189645	-0.66913	-0.589402	-0.567007	-1.23471	0.856612	-0.481385	0.751382	-0.24958	2.18322
cg07816687	0.601786	0.165087	-0.819354	-0.657396	-0.766333	-1.12694	1.22143	-0.522737	0.831288	-0.0521312	1.89217
cg09030672	0.492403	0.12927	-0.74081	-0.828139	-0.931287	-0.75105	0.953798	-0.647073	0.980338	-0.0463419	2.01057
cg18705279	0.478772	0.16675	-0.980709	-0.759468	-0.817378	-0.6203	1.38241	-0.528765	0.808058	-0.340916	1.85707
cg00318756	0.549038	0.225376	-1.35248	-1.13078	-1.00024	0.781221	-0.286505	0.0880337	0.0323759	1.63002	1.23835
cg01356829	0.766193	0.0675075	-0.80605	-0.462018	-1.07064	0.623426	-0.421771	1.43945	-1.2334	0.2704	1.6606
cg06952660	0.493543	0.141991	-1.16961	-1.06537	-0.848811	0.854097	-0.555947	-0.104463	0.481073	0.311795	2.09724
cg11132246	0.731754	0.100617	-1.11825	-0.90168	-1.54673	1.43653	0.263539	-0.0188202	-0.260657	1.21428	0.931795
cg19745415	0.80432	0.105728	-0.915705	-1.13451	-1.44185	1.21552	0.583582	0.188697	-0.703225	1.17697	1.03052
cg09232937	0.294117	0.163338	-0.769549	-0.855252	0.143433	-0.793833	0.137356	-0.566127	2.40211	-0.508818	0.810681
cg24678862	0.282458	0.288661	-0.801096	-0.55851	0.4086	-0.812775	-0.539457	-0.384754	1.76475	-0.811009	1.73425
cg09408768	0.331274	0.241482	-0.922277	-0.83237	-0.760945	-0.180026	-0.805711	-0.23393	0.256422	1.62914	1.84969
cg11856810	0.155663	0.147701	-0.591338	-0.590574	0.0231724	-0.482713	-0.373838	-0.237862	-0.2258	-0.301315	2.78027
cg25534294	0.275376	0.120203	-0.270717	-0.0535714	-0.235789	-0.0395584	-0.943337	-0.0559349	-1.51171	2.20739	0.903232
cg04920649	0.380669	0.192671	-0.470157	-0.060479	-0.718278	-0.0928575	-0.730909	0.101198	-1.3612	2.05368	1.279
cg07216112	0.289624	0.241046	-0.492214	-0.270699	-0.579123	-0.301342	-0.869823	0.159191	-0.938766	2.4125	0.880278
cg06755413	0.160286	0.24155	-0.528653	-0.50921	-0.512882	-0.509039	-0.0550646	0.492357	-0.483941	2.67199	-0.565562
cg23393521	0.117254	0.163941	-0.540412	-0.602337	-0.623335	-0.642351	0.363201	0.91896	-0.588448	2.39866	-0.683933
cg24071726	0.161638	0.21907	-0.526421	-0.429305	-0.459675	-0.485564	-0.261715	0.469184	-0.435642	2.69957	-0.570436
cg02548364	0.418635	0.204915	-1.22946	-0.524246	-1.01785	0.56973	0.509526	0.116014	0.601305	2.02747	-1.05248
cg09424526	0.141412	0.231249	-0.557109	-0.510388	-0.357806	-0.492318	-0.451915	-0.45591	-0.534359	0.753359	2.60645
cg15133719	0.293751	0.21762	-0.700194	-0.617768	-0.254617	-0.421255	-0.66285	-0.412324	-0.517407	2.33057	1.25584
cg15703632	0.184656	0.150164	-0.377856	-0.415018	-0.00951944	-0.310463	-0.313231	-0.17188	-0.481234	-0.702198	2.7814
cg20584905	0.314721	0.227694	-0.821721	-0.742933	-0.460889	0.425327	0.141524	-0.734609	-0.941965	2.28093	0.854339
cg23655970	0.307292	0.211066	-0.586464	-0.481645	-0.701272	-0.609781	-0.161921	-0.526961	-0.128282	2.6306	0.565727
cg02022733	0.588584	0.226004	-1.40014	-0.920391	-1.0518	-0.264274	-0.494481	0.499111	0.928536	1.40768	1.29577
cg03640756	0.385184	0.279414	-1.10857	-0.931913	-0.924251	-0.543252	-0.325882	-0.150595	0.888356	1.69338	1.40273
cg15361590	0.532522	0.223623	-1.33179	-0.856815	-0.954398	-0.397248	-0.478953	0.216136	0.81164	1.58044	1.41098
cg15949044	0.512464	0.280842	-1.30365	-0.954738	-0.969823	-0.30473	-0.517948	0.228776	0.963313	1.53086	1.32794
cg23445461	0.579063	0.255194	-1.4186	-1.01415	-1.12951	-0.0536388	-0.331993	0.411073	0.799175	1.45612	1.28151
cg22379213	0.611246	0.138633	-0.86055	-1.13975	-1.16419	0.845639	0.935726	-0.0933298	-0.95957	1.46072	0.975298
cg02191312	0.118912	0.239969	-0.481734	-0.43793	-0.42618	0.329097	-0.358121	-0.448144	-0.45935	-0.462181	2.74454
cg17929687	0.175715	0.268907	-0.538199	-0.466565	-0.327474	0.641634	-0.261703	-0.509697	-0.579766	-0.595424	2.63719
cg18242103	0.267304	0.218272	-0.418616	-0.421511	0.00292159	0.127857	-0.315844	-0.394612	-0.645812	-0.673767	2.73938
cg24089118	0.175612	0.224671	-0.544878	-0.352623	-0.0257844	-0.0120861	-0.261716	-0.394865	-0.593893	-0.582169	2.76802
cg24989962	0.213123	0.239122	-0.541597	-0.287748	0.00970534	0.0299503	-0.224323	-0.37064	-0.562947	-0.789961	2.73756
cg04927931	0.214668	0.25136	-0.656887	-0.589212	-0.323853	-0.657026	0.153192	-0.644817	1.04259	-0.703744	2.37976
cg08133486	0.402407	0.258432	-0.755548	-0.527004	-0.475917	-0.731722	1.94628	-0.686157	-0.204317	-0.297748	1.73214
cg11471772	0.204353	0.162823	-0.634399	-0.424282	-0.0584388	-0.387225	-0.0393015	-0.752611	1.305	-1.16297	2.15423
cg11891393	0.230019	0.0852338	-0.95399	-1.17891	0.0165893	0.380817	-0.250169	-1.02079	1.61886	-0.272315	1.65991
cg21063722	0.233176	0.254129	-0.695591	-0.537592	-0.315229	-0.566841	0.0601208	-0.609351	0.63538	-0.561711	2.59081
cg22478310	0.34844	0.163709	-0.77661	-0.683846	-0.425336	-0.758612	-0.278757	-0.956207	0.610855	1.15152	2.11699
cg12377139	0.33034	0.218667	-0.977635	-0.85728	-0.0817113	-0.92249	-0.243987	-0.817008	0.767601	1.22781	1.9047
cg12610471	0.29202	0.192841	-0.879992	-0.906525	0.168171	-0.755357	-0.528473	-0.755785	0.301872	1.33768	2.01841
cg18247055	0.330186	0.294343	-0.903908	-0.910268	0.143739	-0.875125	-0.453849	-0.975832	1.0736	1.60452	1.29712
cg23016129	0.335503	0.280484	-0.871982	-0.807467	-0.162042	-0.881479	-0.420138	-0.91786	1.02976	1.75106	1.28015
cg04346113	0.109385	0.172169	-0.434917	-0.434549	-0.378556	-0.368624	-0.0960222	-0.260455	-0.355913	2.81177	-0.482736
cg21263122	0.162074	0.253017	-0.440164	-0.410766	-0.405215	-0.229381	-0.289111	-0.0947991	-0.473546	2.80843	-0.465444
cg19797376	0.442418	0.271952	-0.800898	-0.757421	-0.520242	-0.674404	-0.585652	-0.674053	0.565265	1.73466	1.71275
cg05940231	0.578321	0.246592	-1.39262	-1.06493	-1.37538	0.144386	0.208412	0.106302	0.870635	1.43635	1.06685
cg12664119	0.712524	0.152398	-1.35671	-1.16935	-1.59454	0.435851	0.866956	0.925946	0.279983	0.996976	0.614889
cg25340966	0.565289	0.285241	-1.44923	-1.03585	-1.44629	0.160389	0.424375	0.152065	0.84117	1.29777	1.0556
cg26272623	0.609426	0.174354	-1.4209	-1.1268	-1.42714	0.245102	0.764483	0.470246	0.65352	1.50657	0.334918
cg04527918	0.334897	0.120454	-0.807706	-0.691376	-0.644579	-0.186443	0.784943	-0.103956	2.11482	-1.28441	0.818705
cg05113927	0.631818	0.194645	-1.10293	-1.31684	-1.07348	-0.213327	0.726694	-0.248654	1.426	0.351881	1.45065
cg05231308	0.430709	0.154429	-0.911294	-0.884265	-0.823891	0.00429281	0.986905	-0.60246	1.57303	-0.828995	1.48667
cg13833437	0.522051	0.185312	-0.759966	-0.942856	-0.815791	-0.282354	0.364655	0.00498774	1.72603	-0.956425	1.66172
cg21752601	0.657484	0.158158	-0.915516	-1.16067	-1.25366	-0.496347	0.851122	0.003728	1.60654	0.0659919	1.29881
cg22129545	0.741778	0.190992	-0.85204	-1.52838	-1.45269	-0.0573815	0.999519	0.0330134	1.1024	0.693251	1.0623

## Sheet: TableS7c
Table S7c: β values of 47 CpG probes in the TSS200 regions of the 15 protocadherin gene loci hypermethylated (Δβ > 0.2) in LMS compared to NM
TargetID	NM1_β	NM2_β	NM3_β	LM1_β	LM2_β	LM3_β	LMS1_β	LMS2_β	LMS3_β
cg09852127	0.205295	0.279481	0.227007	0.303814	0.189452	0.169796	0.567837	0.563129	0.526675
cg14557699	0.193256	0.235542	0.255797	0.258043	0.314815	0.217922	0.423695	0.529037	0.609345
cg10553103	0.232923	0.376875	0.391399	0.715053	0.60738	0.639749	0.520975	0.574425	0.888254
cg25010500	0.302357	0.260285	0.286177	0.742071	0.462685	0.514416	0.427331	0.437971	0.864742
cg01311360	0.174424	0.190445	0.251133	0.265092	0.29171	0.205108	0.688283	0.880673	0.839227
cg10917547	0.256084	0.308215	0.317999	0.605568	0.363107	0.469241	0.677811	0.886773	0.861385
cg22847228	0.0990854	0.0893898	0.143499	0.126062	0.132543	0.103834	0.66739	0.300317	0.806576
cg26826004	0.182902	0.205455	0.272725	0.270965	0.27446	0.21206	0.640125	0.830232	0.668894
cg03892308	0.70188	0.690047	0.705037	0.651795	0.593548	0.773985	0.889472	0.929303	0.912606
cg17857974	0.195942	0.219847	0.245535	0.183169	0.210721	0.204695	0.589559	0.693322	0.568632
cg18118262	0.21606	0.264017	0.237583	0.226101	0.252857	0.609356	0.704016	0.91147	0.632828
cg26647197	0.220526	0.236007	0.249279	0.302501	0.301181	0.213979	0.618975	0.879574	0.576376
cg07730329	0.370017	0.310358	0.381021	0.238979	0.535456	0.181439	0.79407	0.904232	0.717549
cg12304520	0.226133	0.176366	0.308398	0.210301	0.529714	0.140253	0.882874	0.947172	0.814025
cg21627409	0.0725993	0.128961	0.170897	0.0563826	0.117418	0.0672754	0.684211	0.902374	0.575125
cg23082339	0.0678861	0.0319385	0.124038	0.0163734	0.08662	0.042599	0.272363	0.702946	0.463921
cg07870307	0.0231133	0.0293058	0.0608796	0.0591602	0.0346287	0.0277774	0.501745	0.294533	0.80898
cg14738170	0.159293	0.149894	0.180126	0.151882	0.235342	0.243895	0.324253	0.396041	0.83223
cg17451176	0.151655	0.201845	0.210663	0.197029	0.106382	0.155673	0.617202	0.36682	0.873036
cg06757585	0.182274	0.200563	0.288558	0.118907	0.334988	0.240617	0.696131	0.486883	0.77811
cg07717903	0.34216	0.318444	0.42185	0.179192	0.634237	0.495382	0.84699	0.535139	0.824679
cg08616061	0.207733	0.253354	0.3301	0.144959	0.279855	0.260435	0.639274	0.519262	0.767168
cg18054674	0.37421	0.433555	0.469892	0.247892	0.586588	0.648728	0.80979	0.738547	0.901014
cg12459904	0.191588	0.247143	0.265151	0.149715	0.155985	0.146648	0.537223	0.509001	0.885019
cg21908557	0.139906	0.150999	0.163894	0.0891278	0.09703	0.0966999	0.439418	0.280173	0.673494
cg23348764	0.187105	0.233186	0.247278	0.255165	0.1403	0.218397	0.693431	0.529585	0.895419
cg26337998	0.0876214	0.0917238	0.126057	0.108615	0.0960793	0.137773	0.215594	0.510189	0.727386
cg00911351	0.140492	0.137985	0.241309	0.130584	0.114134	0.172754	0.519654	0.605153	0.387332
cg07125905	0.108057	0.0992398	0.162144	0.281449	0.16016	0.171674	0.199164	0.408351	0.534574
cg19734465	0.138154	0.135021	0.224777	0.226125	0.14612	0.162831	0.411326	0.331323	0.770829
cg22648135	0.142314	0.157916	0.19982	0.136894	0.480991	0.164559	0.452712	0.321138	0.654131
cg03608712	0.0786874	0.0927866	0.150565	0.206814	0.11596	0.141836	0.147684	0.203707	0.293434
cg04553690	0.144204	0.14385	0.240272	0.133489	0.133614	0.160814	0.529204	0.549426	0.365801
cg08491188	0.159958	0.171917	0.256591	0.142472	0.180387	0.218362	0.625754	0.514131	0.62153
cg24954590	0.137149	0.164706	0.215397	0.253508	0.153829	0.216504	0.295259	0.509344	0.668293
cg09465698	0.0575532	0.066334	0.115059	0.0467012	0.237248	0.0710334	0.612262	0.60661	0.700425
cg10435816	0.0306816	0.0369991	0.0828189	0.0253182	0.0469979	0.0468882	0.285849	0.373331	0.303349
cg13933262	0.0137196	0.0387972	0.0808443	0.022434	0.12848	0.0360491	0.26681	0.495864	0.0594488
cg14011639	0.066296	0.0827489	0.142034	0.059851	0.0703823	0.104116	0.43952	0.224425	0.404244
cg05670472	0.231211	0.271731	0.291069	0.200228	0.248191	0.22355	0.772984	0.889199	0.731175
cg14681511	0.351799	0.438108	0.371825	0.190915	0.279414	0.62066	0.836916	0.628765	0.929074
cg16316394	0.357268	0.416893	0.387448	0.323844	0.423928	0.237266	0.840888	0.93192	0.903175
cg02022733	0.272147	0.380572	0.350872	0.528857	0.476829	0.701385	0.798437	0.906725	0.881433
cg03640756	0.0754329	0.124794	0.126935	0.233392	0.294128	0.343106	0.633403	0.858338	0.777127
cg15361590	0.234703	0.340918	0.319096	0.443688	0.425417	0.580855	0.714024	0.885945	0.848051
cg15949044	0.146344	0.244334	0.240097	0.426883	0.367003	0.576714	0.783003	0.942395	0.885406
cg23445461	0.217047	0.320259	0.29082	0.565375	0.494341	0.683966	0.783007	0.950656	0.906096

## Sheet: TableS7d
Table S7d: Z-scores of 47 CpG probes in the TSS200 regions of the 15 protocadherin gene loci hypermethylated (Δβ > 0.2) in LMS compared to NM
TargetID	Average of β values	Standard deviation of β values	NM1_ Zscore	NM2_ Zscore	NM3_ Zscore	LM1_ Zscore	LM2_ Zscore	LM3_ Zscore	LMS1_ Zscore	LMS2_ Zscore	LMS3_ Zscore
cg09852127	0.336943	0.157755	-0.834511	-0.364249	-0.696877	-0.210004	-0.934938	-1.05954	1.46363	1.43379	1.2027
cg14557699	0.337495	0.140246	-1.02847	-0.726958	-0.582535	-0.566521	-0.161712	-0.852591	0.614637	1.36576	1.93839
cg10553103	0.54967	0.185624	-1.70639	-0.930884	-0.852645	0.890955	0.310893	0.485272	-0.15459	0.133361	1.82403
cg25010500	0.477559	0.194387	-0.901306	-1.11774	-0.98454	1.36074	-0.0765211	0.189603	-0.258393	-0.203659	1.99181
cg01311360	0.420677	0.276505	-0.890592	-0.832652	-0.613168	-0.562685	-0.46642	-0.77962	0.967814	1.66361	1.51372
cg10917547	0.527354	0.227378	-1.19303	-0.963762	-0.920736	0.343982	-0.722352	-0.255576	0.661705	1.58071	1.46906
cg22847228	0.2743	0.256395	-0.683377	-0.721192	-0.510154	-0.578162	-0.552884	-0.664858	1.53315	0.101475	2.076
cg26826004	0.395313	0.231847	-0.916171	-0.818895	-0.528748	-0.536337	-0.521263	-0.790405	1.05592	1.87589	1.18001
cg03892308	0.760853	0.115283	-0.511545	-0.614194	-0.484165	-0.946	-1.45125	0.113918	1.11569	1.46119	1.31636
cg17857974	0.345713	0.195171	-0.767385	-0.644904	-0.513287	-0.832834	-0.691664	-0.722541	1.24939	1.78105	1.14217
cg18118262	0.450476	0.249384	-0.939982	-0.747681	-0.853676	-0.89972	-0.79243	0.637089	1.01666	1.84853	0.731209
cg26647197	0.399822	0.222297	-0.806558	-0.73692	-0.677213	-0.437795	-0.443735	-0.836008	0.985855	2.15815	0.794223
cg07730329	0.492569	0.24372	-0.502837	-0.747623	-0.457689	-1.0405	0.175968	-1.27658	1.23708	1.68908	0.923106
cg12304520	0.470582	0.310566	-0.78711	-0.947356	-0.522221	-0.838086	0.190402	-1.06364	1.32755	1.53459	1.10586
cg21627409	0.30836	0.303684	-0.776336	-0.590744	-0.452654	-0.829736	-0.628752	-0.793867	1.23764	1.95603	0.878428
cg23082339	0.200965	0.223769	-0.594714	-0.75536	-0.343779	-0.824918	-0.510994	-0.707719	0.319068	2.2433	1.17512
cg07870307	0.204458	0.264005	-0.686899	-0.663443	-0.543848	-0.55036	-0.643281	-0.669232	1.12607	0.341187	2.28981
cg14738170	0.296995	0.205201	-0.671061	-0.716862	-0.569534	-0.707177	-0.300453	-0.258771	0.132837	0.482677	2.60834
cg17451176	0.320034	0.244582	-0.688436	-0.483229	-0.447176	-0.502919	-0.873537	-0.672006	1.215	0.191291	2.26101
cg06757585	0.36967	0.220648	-0.849297	-0.766409	-0.367608	-1.13648	-0.157184	-0.584882	1.47955	0.531221	1.85109
cg07717903	0.510897	0.213678	-0.789675	-0.900665	-0.416735	-1.55236	0.577221	-0.0726087	1.57289	0.113452	1.46848
cg08616061	0.378016	0.201178	-0.846426	-0.619657	-0.238174	-1.15846	-0.487928	-0.584461	1.29864	0.702096	1.93436
cg18054674	0.578913	0.203296	-1.00692	-0.715008	-0.536267	-1.62827	0.0377564	0.343418	1.13567	0.78523	1.5844
cg12459904	0.343053	0.23761	-0.637451	-0.403643	-0.327854	-0.813677	-0.787288	-0.826586	0.817183	0.698407	2.28091
cg21908557	0.236749	0.187579	-0.516277	-0.457143	-0.388397	-0.786982	-0.744855	-0.746615	1.08045	0.231498	2.32832
cg23348764	0.377763	0.249836	-0.763133	-0.578689	-0.522284	-0.490715	-0.950475	-0.637884	1.26351	0.607687	2.07199
cg26337998	0.233449	0.215347	-0.677172	-0.658122	-0.498691	-0.579687	-0.637896	-0.444287	-0.0829095	1.28509	2.29368
cg00911351	0.272155	0.175306	-0.751045	-0.76535	-0.175956	-0.807564	-0.901399	-0.567013	1.41181	1.89952	0.657001
cg07125905	0.23609	0.13852	-0.924296	-0.987946	-0.533827	0.327451	-0.548154	-0.465034	-0.266573	1.24357	2.1548
cg19734465	0.282945	0.194211	-0.745535	-0.761669	-0.299511	-0.292568	-0.704519	-0.618475	0.661038	0.249098	2.51214
cg22648135	0.301164	0.176999	-0.897465	-0.809314	-0.572566	-0.928081	1.01598	-0.771781	0.856208	0.11285	1.99417
cg03608712	0.159053	0.0628384	-1.27892	-1.05455	-0.135069	0.76006	-0.685772	-0.273986	-0.180917	0.710626	2.13852
cg04553690	0.266742	0.161977	-0.756513	-0.758701	-0.163415	-0.822666	-0.821892	-0.653968	1.62037	1.74522	0.611569
cg08491188	0.321233	0.192925	-0.835948	-0.773963	-0.335064	-0.926588	-0.73006	-0.533222	1.57844	0.999857	1.55655
cg24954590	0.290443	0.170342	-0.899922	-0.738145	-0.440563	-0.216831	-0.802	-0.434063	0.0282691	1.28507	2.21819
cg09465698	0.279247	0.261638	-0.847333	-0.813772	-0.62754	-0.88881	-0.160525	-0.79581	1.27281	1.25121	1.60977
cg10435816	0.136915	0.132754	-0.800225	-0.752637	-0.40749	-0.840626	-0.677319	-0.678145	1.12188	1.78085	1.25371
cg13933262	0.126938	0.14986	-0.755499	-0.588159	-0.307583	-0.697349	0.0102857	-0.606497	0.933347	2.46181	-0.450353
cg14011639	0.177069	0.13967	-0.7931	-0.675302	-0.250838	-0.839244	-0.763844	-0.522318	1.87908	0.339058	1.62651
cg05670472	0.428815	0.264897	-0.745966	-0.593	-0.519998	-0.862929	-0.681867	-0.774886	1.29925	1.73797	1.14142
cg14681511	0.516386	0.23869	-0.689543	-0.327949	-0.605647	-1.36358	-0.992805	0.436858	1.34287	0.470815	1.72897
cg16316394	0.535848	0.258099	-0.691905	-0.460887	-0.574972	-0.821401	-0.43363	-1.15685	1.18187	1.53457	1.4232
cg02022733	0.588584	0.226004	-1.40014	-0.920391	-1.0518	-0.264274	-0.494481	0.499111	0.928536	1.40768	1.29577
cg03640756	0.385184	0.279414	-1.10857	-0.931913	-0.924251	-0.543252	-0.325882	-0.150595	0.888356	1.69338	1.40273
cg15361590	0.532522	0.223623	-1.33179	-0.856815	-0.954398	-0.397248	-0.478953	0.216136	0.81164	1.58044	1.41098
cg15949044	0.512464	0.280842	-1.30365	-0.954738	-0.969823	-0.30473	-0.517948	0.228776	0.963313	1.53086	1.32794
cg23445461	0.579063	0.255194	-1.4186	-1.01415	-1.12951	-0.0536388	-0.331993	0.411073	0.799175	1.45612	1.28151
